# Supplementary material for: Genetic architecture of natural variation in cuticular hydrocarbon composition in Drosophila melanogaster
Source: eLife. 2015 Nov 14;4:e09861. doi: 10.7554/eLife.09861 (PMC4749392; doi:10.7554/eLife.09861)
Supplement: Supplementary file 1. — (A) DGRP females. (B) DGRP males. (C) DGRP and African females. (D) DGRP and African males. DOI: http://dx.doi.org/10.7554/eLife.09861.040 [file elife-09861-supp1.xlsx]

## Sheet: A
DGRP Line	n-C21 (1)	n-C22 (4)	7,11-C23:2 (5)	2-Me-C22 (6)	9-C23:1 (8)	7-C23:1 (9)	6-C23:1 (10)	5-C23:1 (11)	x-C23:1 (12)	n-C23 (13)	11- & 9-Me-C23 (14)	7,11-C24:2 (15)	x,y-C24:2 (16)	3-Me-C23 & 9-C24:1 (17)	6-C24:1 (19)	NI (20)	5-C24:1 (21)	n-C24 (22)	9,13-C25:2 (23)	7,11-C25:2 (24)	2-Me-C24 (25)	6,10-C25:2 (26)	5,9-C25:2 & 9-C25:1 (27)	8-C25:1 (28)	7-C25:1 (29)	5-C25:1 (31)	n-C25 (32)	NI (33)	NI (34)	13- & 11-Me-C25 (35)	5-Me-C25 (36)	8,12-C26:2 (37)	7,11-C26:2 (38)	2-Me-C25 (39)	6,10-C26:2 (40)	3-Me-C25 & 9-C26:1 (41)	7-C26:1 (42)	n-C26 (44)	9,13-C27:2 (45)	7,11-C27:2 & 2-Me-C26 (46)	5,9-C27:2 & 9-C27:1 (47)	7-C27:1 (48)	5-C27:1 (49)	n-C27 (50)	8,12-C28:2 (51)	7,11-C28:2 & 2-Me-C27 (52)	3-Me-C27 & 6,10-C28:2 & 9-C28:1 (53)	NI (54)	n-C28 (55)
DGRP_21	0.0034159	0.00750571	0.00311722	0.00417324	0.00149497	0.00673021	0.00242139	0.00230418	0.000131938	0.0583929	0.000376807	0.000331354	0.000455502	0.0010176	0.00191552	0	0.000421422	0.0132361	0.00172751	0.0150351	0.01977	0.00176228	0.0259665	0.00298497	0.0140203	0.00194671	0.063567	0.00039043	0	0.000366055	0.000459087	0.000726274	0.00480187	0.000851568	0.00166206	0.00227766	0.0016204	0.00996127	0.00395819	0.309819	0.0343866	0.0264553	0.00280159	0.0473175	0.00499642	0.00755107	0.00415989	0.00277718	0.00334345
DGRP_26	0.00291365	0.00740221	0.00269137	0.00260906	0.00137295	0.00545438	0.0033587	0.00075851	0.00065527	0.0572179	0.000814114	0.000634676	0.000357062	0.000864884	0.00158008	0.00026362	0.000337774	0.0132978	0.00310581	0.00897056	0.0138245	0.00169682	0.0188954	0.00580493	0.00595799	0.00177021	0.0610037	0.000492552	0.00028735	0.000849072	0.00100978	0.000882312	0.00274556	0.00221846	0.00221261	0.00331598	0.00229488	0.0130322	0.00501599	0.292882	0.0466259	0.0188102	0.003173	0.0602718	0.00590265	0.00704148	0.00581341	0.00497113	0.00551998
DGRP_28	0.00168234	0.00465603	0.000469289	0.00185725	0.000542864	0.00581316	0.00177378	0.000721338	0.000350303	0.0491352	0.00033938	0.000142961	0.000197176	0.00050974	0.00150355	0.000490982	0.000925922	0.0131545	0.000430738	0.00282307	0.0137141	0.00161067	0.0250803	0	0.0190825	0.00323765	0.0658448	0.000216518	0.000278297	0.000399649	0.000519537	0.000183598	0	0.00326925	0.00106664	0.00299554	0.00288034	0.012001	0.00104518	0.213343	0.0595056	0.0558353	0.00566615	0.0610554	0.00270035	0.00656166	0.0054846	0.00568756	0.00467123
DGRP_31	0.000849071	0.00233789	0.000865924	0.00150519	0.000954197	0.00243935	0.00178591	0.00132141	0.00045544	0.0343404	0.000188589	0.000176307	0.000326594	0.000531002	0.000912418	9.3941e-05	0.000322262	0.00849414	0.00208125	0.00447183	0.012715	0.00105886	0.0354824	0	0.00495787	0.0110271	0.07322	0.00043918	0.000124973	0.000163987	0.000445314	0.000548091	0.00213074	0.00243893	0.00199651	0.0058782	0.00169238	0.0114881	0.00589053	0.23676	0.187362	0.0145088	0.0125858	0.0571743	0.00360468	0.00627287	0.00636791	0.00113961	0.00304544
DGRP_38	0.00221561	0.00432734	0.00127539	0.00194618	0.00211599	0.00502551	0.00222188	0.00194767	0.000378465	0.0404151	0.000333088	1.28829e-05	0.000392554	0.000766821	0.0015303	0.000615216	0.000324439	0.00846228	9.85411e-05	0.00855653	0.0150441	0.00131947	0.0469146	0	0.0143236	0.00835043	0.0497242	0.000311312	0.000127718	0.000338429	0.000535873	0.000118088	0.00113634	0.00214256	0.00150855	0.00661319	0.00298358	0.0098156	0.000199389	0.193938	0.24898	0.0362958	0.0119755	0.0487294	0.000610241	0.00413991	0.0101432	0.00178334	0.00344591
DGRP_40	0.0024098	0.00772437	0.00164728	0.00165909	0.00153146	0.00449859	0.00250667	0.00170197	0.000243299	0.0597374	0.00029916	0.000286919	0.000293776	0.000719015	0.00162099	0.000210316	0.000394811	0.0155601	0.00153254	0.00822232	0.00990857	0.00104783	0.0215497	0.00238999	0.00921455	0.00167912	0.0648913	0.000250724	0	0.000350874	0.000429502	0.000477409	0.0014642	0.00170738	0.00101583	0.00250041	0.0025283	0.0137756	0.00262095	0.17569	0.0484533	0.0289934	0.00422398	0.0666679	0.00505088	0.00865021	0.0069465	0.00429005	0.00627743
DGRP_41	0.00463518	0.00792011	0.00289327	0.00361982	0.00197098	0.00975741	0.00464543	0.00132391	0.00161004	0.112427	0.000438587	0.000348718	0.000501443	0.000750598	0.00164907	5.49317e-05	0.000324078	0.0113825	0.005598	0.0264468	0.0271179	0.00457184	0.029868	0.00544614	0.0116778	0.00176838	0.0772374	0.000290287	0	0.000501983	0.000506406	0.00102675	0.00331826	0.0029255	0.00182952	0.00202835	0.00121362	0.00773019	0.00527773	0.350426	0.024646	0.010332	0.00253692	0.0550139	0.00236866	0.00381816	0.000424806	0.00488926	0.00270768
DGRP_42	0.0026904	0.00736951	0.00196351	0.0052822	0.00105259	0.0070329	0.00319952	0.00122451	0.000598553	0.0753867	0.000317397	0.000386197	0.000789809	0.000706474	0.00188632	0	0.00067412	0.0142439	0.00348818	0.0152773	0.0407194	0.00344629	0.027647	0.00363351	0.011811	0.00210204	0.0709374	0.000375616	0	0.000288152	0.000385694	0.000970746	0.0029008	0.00396715	0.00413456	0.00224163	0.00120682	0.00817938	0.00620345	0.417524	0.0280787	0.0194768	0.00214841	0.0335768	0.0045995	0.00509644	0.00415685	0.00171877	0.00199533
DGRP_45	0.00100954	0.00315797	0.000872254	0.00139121	0.000593173	0.00333569	0.00163343	0.00120004	0.000163687	0.0307266	0.000446638	0.000155618	0.000265131	0.000629464	0.000935391	8.5225e-05	0.00032837	0.00916358	0.00101236	0.005477	0.011326	0.00102172	0.0192958	0.00370838	0.00861155	0.00187254	0.0783663	0.000386223	0.00073572	0.0007398	0.000734437	0.000525125	0.00270725	0.00198563	0.00205807	0.0029725	0.00202863	0.0174168	0.00345542	0.297275	0.0414055	0.0216685	0.0033502	0.0792249	0.00466072	0.00702636	0.0039927	0.005826	0.00564721
DGRP_48	0.00107623	0.00180526	0.000776453	0.000936781	0.00109092	0.00175827	0.00101733	0.00256642	0.000301267	0.029774	0.000373313	0	0.000245583	0.000897639	0.000374238	0.000200437	0.000367981	0.00654878	0.000877153	0.00277557	0.0101778	0.000971705	0.0671327	0	0.0056621	0.023934	0.0699569	0.000493281	0.000205805	0.000263503	0.000481707	0.000259997	0.00160053	0.00156578	0.00263825	0.00698058	0.000621473	0.00997572	0.00327261	0.190672	0.250451	0.0138715	0.0219578	0.0611475	0.00163016	0.00397048	0.00683585	0.00145626	0.00307246
DGRP_49	0.00314882	0.00591062	0.00244518	0.00223324	0.00243826	0.00626151	0.00305321	0.000538343	0.00105248	0.0696149	0.000515726	0.000387914	0.000250977	0.00057904	0.00106954	0.000105675	0.000210523	0.00824071	0.00505781	0.0128369	0.0114513	0.00228678	0.0210093	0.00382184	0.00847802	0.000937387	0.0560886	0.000344513	0.000138776	0.000457071	0.000465179	0.000719181	0.00276665	0.00235226	0.00103358	0.00211599	0.00180542	0.00884287	0.00608555	0.286307	0.0452455	0.0166865	0.00312356	0.0656477	0.00348309	0.00775911	0.00253777	0.00391695	0.00389674
DGRP_57	0.00452043	0.0124444	0.00586334	0.00225554	0.00342987	0.0103552	0.00436394	0.00158817	0.000884237	0.0882557	0.000675506	0.00129576	0.000579743	0.00133287	0.00268581	0.000126323	0.000653667	0.0192234	0.0058485	0.0301985	0.0220538	0.00382095	0.0375821	0.00561119	0.0112921	0.00196839	0.0667304	0.000327147	2.32022e-05	0.000872297	0.000865495	0.00217934	0.00518523	0.000391864	0.00523763	0.00320596	0.00136301	0.0101229	0.00573949	0.345869	0.023712	0.011205	0.00220456	0.0454836	0.00469671	0.0036764	0.00489212	0.00325001	0.00327673
DGRP_59	0.00178338	0.00452989	0.00119094	0.00198694	0.00089246	0.00432368	0.00252103	0.00117057	0.000356858	0.064275	0.000436141	0.000168287	0.000266547	0.000712091	0.00125068	4.20003e-05	0.000357672	0.0118892	0.00202027	0.00611075	0.0126676	0.00128095	0.0198596	0.0036126	0.00980845	0.00196835	0.0921382	0.000350124	0.000215036	0.000622944	0.000738521	0.000432309	0.00222593	0.0025259	0.00135914	0.00286923	0.00163156	0.0128416	0.00452125	0.273063	0.0415324	0.0294628	0.00343066	0.076451	0.00362376	0.00657015	0.0039563	0.00472471	0.00441287
DGRP_69	0.00269794	0.0051525	0.00162613	0.00287752	0.000735661	0.00463536	0.00266272	0.0010294	0.000382124	0.0566025	0.000394519	0.000271616	0.00024664	0.000559002	0.00094798	0.000101547	0.0002411	0.00822618	0.00285706	0.00829169	0.0101104	0.0014197	0.0126557	0.00366392	0.00614372	0.0012037	0.0506332	0.000326693	0.000141045	0.000574771	0.000549028	0.000508044	0.00124954	0.00307537	0.00131919	0.00206007	0.00137373	0.0101744	0.00390028	0.265073	0.0400444	0.0165211	0.00335878	0.0728733	0.00297759	0.00680592	0.00387968	0.00499893	0.00522653
DGRP_73	0.00240298	0.0061799	0.00262915	0.00329223	0.0015085	0.0057147	0.00307079	0.00142734	0.000382226	0.0525475	0.000993086	0.000489154	0.000814231	0.000904969	0.00143647	0.000136634	0.000524596	0.0113574	0.00268703	0.00912828	0.0347126	0.00146871	0.0169407	0.00338464	0.0113164	0.00173013	0.0578415	0.000601825	0.000479923	0.00115639	0.00105658	0.000635505	0.0033703	0.00315039	0.00231714	0.00449186	0.00148283	0.00911118	0.00486509	0.356444	0.0448673	0.027665	0.00405108	0.0487565	0.00454192	0.00665571	0.0060674	0.00675693	0.00314546
DGRP_75	0.00190024	0.00432768	0.00227003	0.0020903	0.00114542	0.00508233	0.00323179	0.000547777	0.000633023	0.0516733	0.000899112	0.000493616	0.000274495	0.000800901	0.00133389	0.000181625	0.000376549	0.00829787	0.00408482	0.0112283	0.0111326	0.00207519	0.0293527	0.00473591	0.00799407	0.00174348	0.0550593	0.000486457	0.000325959	0.000973279	0.000844319	0.000894009	0.00451429	0.00116807	0.00341581	0.00284701	0.00171197	0.00779114	0.00669603	0.351608	0.0412179	0.0157322	0.00304225	0.0566738	0.00549025	0.00655897	0.0037561	0.00452864	0.00321782
DGRP_83	0.00157169	0.00392208	0.00101443	0.00174151	0.000513055	0.00269897	0.00198124	0.000671435	0.000266048	0.0264295	0.000403144	0.000178252	0.000152332	0.000499907	0.000987746	0.000222225	0.000178218	0.00939424	0.00134324	0.00450031	0.00739476	0.00094248	0.012015	0.00498362	0.00503543	0.00144853	0.0553229	0.000389942	0.000398407	0.000782728	0.000713387	0.000348307	0.0018985	0.000936232	0.000943108	0.002314	0.00311746	0.0172546	0.00678889	0.242671	0.0627695	0.0266129	0.00376192	0.064526	0.00897848	0.00644732	0.00866476	0.00374907	0.00648868
DGRP_85	0.0021736	0.0055492	0.0020868	0.00178924	0.00125882	0.00436321	0.00253918	0.000714979	0.000427617	0.0492133	0.000619993	0.000459086	0.000173084	0.000576998	0.00102873	0.000247772	0.000367039	0.0110546	0.00246669	0.00785213	0.00674495	0.00165524	0.0156233	0.00241458	0.0077555	0.00111902	0.0606349	0.000340236	0.000345719	0.00084197	0.000616817	0.000512174	0.00200984	0.00173521	0.00120462	0.00251777	0.00224842	0.0172651	0.00401434	0.234049	0.0518016	0.0267918	0.00422663	0.0865007	0.00435346	0.00731243	0.00586092	0.00734308	0.00674405
DGRP_88	0.00377891	0.00566276	0.00116816	0.00131758	0.00117814	0.00614944	0.00146383	0.00271139	0.00015088	0.0866315	0.000173953	0.000117824	0.000130423	0.000434441	0.000693199	0.000407521	0.000440976	0.0100774	0.000659432	0.0056142	0.00575768	0.000781235	0.0164156	0.00134464	0.0186429	0.00250785	0.0974836	0.000156254	9.2387e-05	0.000288015	0.000191175	0.000207229	0.00142573	0.00099816	0.000563306	0.00120969	0.00127828	0.0181416	0.00106541	0.158404	0.040943	0.0313362	0.00832057	0.173719	0.00101313	0.0045091	0.00113564	0.00369892	0.00954966
DGRP_91	0.00344723	0.00617755	0.00271837	0.00441845	0.00180994	0.00712203	0.00373739	0.000831419	0.000990084	0.0779008	0.000755798	0.000436575	0.00076804	0.00114873	0.00160459	0.000110281	0.000254096	0.0119014	0.00711897	0.0196975	0.0346311	0.0030732	0.0322264	0.00891242	0.00771298	0.00126426	0.0865167	0.000583257	0.000195125	0.000811994	0.0010358	0.00131832	0.0033731	0.00289962	0.00321745	0.00289401	0.00150529	0.00974971	0.00802804	0.397692	0.0198055	0.00705209	0.0016809	0.0557086	0.00309228	0.00353711	0.000805917	0.0042857	0.0028927
DGRP_93	0.00130852	0.00305146	0.000666816	0.00152093	0.000703879	0.00437597	0.00212306	0.000825789	0.000355649	0.0498012	0.000179262	7.35547e-05	0.000161875	0.000401085	0.000675838	0.000382249	0.000330198	0.00734824	0.00131538	0.00539426	0.00914718	0.00152289	0.0200751	0.00116528	0.0153638	0.00299389	0.0698714	0.000154032	0.000108191	0.000267825	0.000345809	0.000237129	0.00169457	0.00176017	0.000853442	0.00173266	0.00139698	0.00927277	0.00303452	0.245616	0.0439703	0.0421284	0.00507066	0.0829242	0.00240466	0.00634652	0.00271898	0.00271943	0.00460588
DGRP_100	0.000188135	0.000182293	0	0.000827783	0.000100216	0.000416128	0.000594359	0.000311553	0.000147319	0.00460483	0	0	0.000452211	0.000244424	0.000273725	0.000395654	0.000109398	0.00428365	0	0.000387126	0.0218503	0.000421681	0.0277752	0	0.00843042	0.00642615	0.0797643	0.000453208	0.000309124	0.000225876	0.000310614	0.000166127	0.00174383	0.00223072	0.00345822	0.00900994	0.00358877	0.0152578	0.000466968	0.222723	0.323219	0.0250284	0.00808786	0.0599999	0.000863127	0.00380955	0.0115581	0	0.00275883
DGRP_101	0.00172829	0.0045626	0.00152609	0.000842912	0.00188742	0.00848936	0.00168433	0.00145453	8.89847e-05	0.0414444	0.000449459	0.000301264	5.5329e-05	0.000736854	0.00245674	0.000540119	0.000845247	0.011133	0.000985771	0.00555333	0.00355347	0.00135346	0.0284976	0	0.0206731	0.00310682	0.0483008	0.00027487	0.000160972	0.000394705	0.000541788	0.000383922	0.00182371	0.000400068	0.000821911	0.00225604	0.00346014	0.0120186	0.00162661	0.148313	0.0450319	0.0704056	0.0054289	0.0747981	0.00416913	0.00732298	0.00508243	0.00361542	0.00884309
DGRP_105	0.000332726	0.000454448	0.000239035	0.00105696	0.000114684	0.000799922	0.000637095	0.000270287	0.00011793	0.00899551	0	8.27233e-05	0.000156748	0.000217175	0.000173444	8.94141e-05	9.03034e-05	0.00438577	0.00023413	0.00190333	0.0124209	0.000635757	0.00888577	0.00414622	0.00556494	0.0015104	0.141349	0.000339658	0.000153264	0.00017736	0.000232404	0.000109221	0.000929143	0.00291984	0.0004128	0.00179989	0.00167728	0.0216009	0.00311358	0.213738	0.0509743	0.0197924	0.00449763	0.166724	0.00144725	0.00567565	0.00257838	0.00281841	0.00619798
DGRP_109	0.00199158	0.00539894	0.00155413	0.00214316	0.000975537	0.00474705	0.00215149	0.000606778	0.000425342	0.0636781	0.000135176	0.000326693	0.000219615	0.000691142	0.00126762	0	0.0002569	0.0106628	0.00248566	0.00779	0.00902077	0.00135111	0.0197916	0.00487761	0.00798918	0.00167636	0.0788389	0.000121608	2.37711e-05	0.000437104	0.000657069	0.000596921	0.00387549	0.000658649	0.00173362	0.00243464	0.00164708	0.0136737	0.00509784	0.276172	0.0397391	0.0218174	0.00268155	0.0909004	0.00446783	0.0070628	0.00310633	0.00336002	0.00642354
DGRP_129	0.00657388	0.0125901	0.00932088	0.0036405	0.0111778	0.0175552	0.00617579	0.00116034	0.00172574	0.11251	0.000251408	0.000580313	0.00166083	0.000915218	0.00262692	0.000919154	0.000323365	0.00967029	0.00163715	0.14572	0.00610618	0.0073266	0.0270579	0	0.0230726	0.000926944	0.0726433	0.000230741	0	0.000361464	0.000162355	0.000784691	0.0025953	0.002935	0.00195024	0.00139502	0.00146172	0.00767396	0.000623055	0.252281	0.0156975	0.00716711	0.00142795	0.053784	0.00053129	0.00319544	0.000180769	0.00263482	0.0024833
DGRP_136	0.000389183	0.00118364	5.61985e-05	0.00116826	0.000388059	0.00108731	0.000491177	0.00159959	0.00010056	0.0115722	0.000181143	0	0.000357291	0.000388824	0.000458458	0.000185206	0.000204201	0.0055372	6.06428e-05	0.000266046	0.0191963	0.000357858	0.0245823	0	0.00652876	0.0183682	0.0642504	0.000562249	0.000413049	0.000276941	0.000553663	6.60767e-05	0	0.00250346	0.000860175	0.00778344	0.00284087	0.0131534	0.000507235	0.146618	0.33724	0.0524897	0.0271059	0.0538618	0.000891126	0.00308961	0.011478	0.00160552	0.00292947
DGRP_138	0.00230446	0.00473836	0.00114393	0.00173838	0.000708509	0.00493122	0.00297294	0.000684749	0.000505587	0.0566575	0.000310216	0.000201706	0.00026214	0.000413489	0.00123114	0	0.000301388	0.00848	0.00206459	0.00846522	0.0104341	0.00189233	0.0187889	0.00316895	0.00967303	0.00132651	0.0551053	0.000323121	0.000117174	0.000406143	0.000408187	0.00048995	0.00290853	0.00222173	0.00143862	0.00169602	0.00138639	0.00824953	0.00365201	0.333775	0.0392876	0.0220885	0.00291965	0.0577556	0.00409749	0.00713753	0.00327256	0.00313471	0.00287749
DGRP_142	0.00342559	0.0056066	0.00220697	0.00190641	0.00165879	0.00643498	0.00327326	0.000703427	0.000667646	0.0774144	0.000420418	0.000302753	0.000340684	0.000699419	0.00125985	0	0.000193175	0.00951247	0.00325652	0.0135805	0.0163294	0.00235951	0.0273915	0.00608409	0.00855593	0.00183448	0.0761759	0.000386325	0.000153921	0.000340169	0.000631778	0.000712242	0.00429505	0.000975328	0.00186454	0.00223779	0.00121979	0.00760407	0.00502404	0.353046	0.0332481	0.0146102	0.00282455	0.0610186	0.00292917	0.00488656	0.00141447	0.00312713	0.00266426
DGRP_149	0.0022763	0.00423541	0.00187851	0.00253938	0.00154751	0.00481695	0.0028612	0.000578422	0.000755549	0.0651596	0.000662669	0.000262171	0.000427563	0.000686206	0.00118884	0	0.000224542	0.0110673	0.00254983	0.00873549	0.0269334	0.00165513	0.0232526	0.00410751	0.00916499	0.00191795	0.0857586	0.000612266	0.000127175	0.000429581	0.000649463	0.000491161	0.00212021	0.00303732	0.00108876	0.00274105	0.00111105	0.00841967	0.00440485	0.334706	0.0288154	0.0178858	0.00218097	0.0518128	0.00313367	0.0059759	0.00171338	0.00341499	0.00273502
DGRP_153	0.00287729	0.0053279	0.00189731	0.00277375	0.00294067	0.00930587	0.00365811	0.0011827	0.000535043	0.0692515	0.000290588	3.75663e-05	0.00046308	0.000966294	0.00223411	0.000903538	0.00027044	0.00993444	0.000109452	0.0118455	0.0207776	0.00270755	0.037531	0	0.0308864	0.00168198	0.0827098	0.000266103	2.78139e-05	0.000381839	0.000471395	0.000129007	0.00194968	0.00308897	0.00168365	0.00271257	0.00280026	0.00859629	0.000462793	0.293573	0.0386402	0.0437721	0.00311561	0.0566297	0.000858564	0.00511177	0.0031925	0.00445676	0.0029301
DGRP_158	0.0031428	0.00741961	0.00288017	0.00265046	0.00149906	0.00627891	0.00353793	0.000973834	0.000423325	0.0586812	0.000266465	0.000638661	0.000317523	0.000706816	0.00170451	6.38075e-05	0.000339532	0.012284	0.00385198	0.0117948	0.013592	0.00259032	0.0237102	0.0053307	0.00910923	0.00179408	0.050656	0.000346903	0	0.000423925	0.000447326	0.000862234	0.00450308	0.000966732	0.00270164	0.00218704	0.0018388	0.0091477	0.00529258	0.340761	0.0427433	0.0198655	0.00320376	0.0556022	0.0058567	0.00594424	0.0039923	0.00325298	0.00438262
DGRP_161	0.00543036	0.0115793	0.00594373	0.00192167	0.00358452	0.00982495	0.00340409	0.00135615	0.000710762	0.073003	0.000370797	0.00120392	0.00043119	0.00110976	0.00252151	0	0.000603923	0.0116176	0.00462208	0.0218664	0.00938441	0.00319623	0.0304567	0.00333938	0.012213	0.00226442	0.0357046	0.000144984	0	0.000402659	0.000523896	0.00130971	0.00798842	0	0.00417302	0.00191662	0.00137959	0.00667574	0.00362113	0.363272	0.0283148	0.0160886	0.0029499	0.04879	0.0055008	0.007318	0.00193195	0.00403477	0.00478136
DGRP_176	0.00267769	0.00544446	0.00150448	0.00285509	0.00137675	0.00611913	0.00357935	0.00150415	0.000522716	0.0590142	0.000194943	0.000247205	0.000371937	0.000742943	0.00138781	0	0.000431914	0.00860017	0.00212573	0.0136849	0.0166616	0.00213965	0.025433	0.00286504	0.0125767	0.00210369	0.0513733	0.000277382	4.69253e-05	0.000607147	0.000549045	0.000600232	0.0033146	0.00157294	0.00214084	0.00226185	0.00121948	0.00674322	0.00331995	0.324544	0.0394852	0.0225387	0.00359499	0.0483063	0.0031248	0.00651733	0.00321411	0.00333229	0.00285255
DGRP_177	0.00345545	0.0113215	0.00489016	0.00301299	0.00388215	0.0104859	0.00282728	0.00187203	0.00068684	0.097537	0.000367545	0.00153625	0.00132898	0.00154242	0.00263934	0	0.000552374	0.0151603	0.00741378	0.05051	0.0291008	0.00343745	0.0357242	0.00612811	0.0110427	0.00152063	0.0769984	0.000325118	0	0.000543197	0.000841438	0.00252014	0.00638766	0.000926494	0.00382735	0.00289117	0.00137578	0.011445	0.00549466	0.315772	0.0197196	0.00900541	0.0017783	0.0655582	0.00374159	0.00458744	0.00103953	0.00417249	0.00446178
DGRP_181	0.00282071	0.00540243	0.00229711	0.0022806	0.00170305	0.0055994	0.00341488	0.000850814	0.000572221	0.0756016	0.00114752	0.000329846	0.000248308	0.000889485	0.0012176	0	0.000259398	0.0113476	0.00287316	0.00866159	0.0122547	0.00179358	0.0201702	0.00465314	0.00824237	0.00159382	0.0896976	0.000644849	0.000551342	0.0012061	0.000997418	0.000460103	0.00295449	0.0014928	0.00119996	0.00342006	0.00145654	0.0110762	0.00469534	0.273508	0.041461	0.0212583	0.00346345	0.0766803	0.00296316	0.0055017	0.00217986	0.0072099	0.00346884
DGRP_189	0.000488846	0.001026	0.000259385	0.000734622	0.000150668	0.000980321	0.00126652	0.000484034	3.69043e-05	0.010349	5.32943e-05	3.23283e-05	9.45977e-05	0.000204598	0.000398362	7.49763e-05	8.38342e-05	0.00336288	0.000615716	0.00143223	0.00573308	0.000625062	0.00859262	0.00502632	0.00353841	0.00115586	0.0497095	0.000461336	0.000178357	0.000326215	0.000299909	0.00011983	0.00275392	0.00217124	0.000689265	0.00158555	0.00166687	0.0104803	0.00568776	0.302978	0.066118	0.0226408	0.0036241	0.0725944	0.00521258	0.010118	0.00457798	0.00170206	0.00372998
DGRP_195	0.00387163	0.00714639	0.0017533	0.00189075	0.00154681	0.00880391	0.00331501	0.00144059	0.000729596	0.0871827	0.000470099	0.000313999	0.000275168	0.000805912	0.00202484	0.000157553	0.000604293	0.0118061	0.00260061	0.0155081	0.0145194	0.0035532	0.041155	0.00366158	0.018436	0.0030455	0.0733525	0.000330073	9.223e-05	0.000385404	0.000471064	0.000836167	0.00466598	0	0.00257634	0.00228405	0.00153264	0.00768023	0.00395296	0.317075	0.0341543	0.0240418	0.00303704	0.0560114	0.00342627	0.00475504	0.00246224	0.00328824	0.00318182
DGRP_208	0.00207607	0.00626286	0.00150508	0.0017805	0.0011311	0.00427344	0.00296347	0.000567915	0.000630357	0.0562854	0.000734059	0.000408869	0.000212574	0.000746911	0.0015789	0.000177817	0.000101109	0.0162035	0.00196145	0.00567174	0.0111266	0.00133588	0.0173174	0.00552159	0.00536835	0.00151547	0.0777432	0.000486096	0.000262185	0.000782256	0.000945733	0.000638826	0.00198854	0.00186846	0.000826253	0.00312918	0.00245788	0.0159023	0.00423009	0.232995	0.0389839	0.0168895	0.00305514	0.07865	0.00703125	0.00710902	0.00308196	0.0051524	0.00688308
DGRP_217	0.000383555	0.000788106	5.58017e-05	0.00192405	4.5195e-05	0.00136754	0.000343745	0.000487958	5.38833e-05	0.00874181	0	0	0.000254603	0.000199094	0.000233172	0.000170769	0.00014787	0.00360358	4.33297e-05	0.00116859	0.0121899	0.000300458	0.00777714	0.000622337	0.00889582	0.0027333	0.0697111	0.000340372	8.43123e-05	0.000152572	0.000176204	3.44147e-05	0.000328065	0.00376508	0.000408763	0.00191967	0.00243466	0.014356	0.0013165	0.229622	0.057739	0.0606324	0.00799886	0.099005	0.00226187	0.00854475	0.00418798	0.00213944	0.00509675
DGRP_223	0.00629711	0.0144317	0.0178923	0.00434592	0.0153378	0.018715	0.00303118	0.00310187	0.000582504	0.0900795	0.000583426	0.00270898	0.00210609	0.00137454	0.00143765	0.000638057	0.000846262	0.00846403	0.0153959	0.222154	0	0.00382571	0.0230958	0	0.0179572	0.00155523	0.0383275	0.000368468	0	0.000469943	0.000448433	0.00303525	0.00464808	0.00270626	0.0034493	0.00181409	0.000259372	0.00420312	0.00410135	0.302587	0.0154466	0.00662146	0.00110989	0.021314	0.00192441	0.00262527	0.000850158	0.00307348	0.00273353
DGRP_227	0.00285438	0.00726589	0.00232981	0.00157271	0.00405126	0.0144861	0.0025044	0.00163038	0.000464294	0.0753144	0.000911302	0.000428915	0.000179019	0.00123193	0.00308329	0.00086869	0.000839829	0.0119116	0.00175626	0.011332	0.00734385	0.00178451	0.0426941	0	0.0331837	0.0046088	0.0602424	0.000392385	0.000278281	0.00066254	0.000810985	0.000700075	0.00330867	0.000541894	0.00114331	0.00271613	0.00241606	0.00790693	0.00225951	0.218774	0.0366814	0.0501459	0.00493555	0.0622458	0.00348566	0.00629438	0.00187923	0.00507491	0.00446081
DGRP_228	0.0031533	0.00762834	0.00474971	0.00147904	0.00223763	0.0075491	0.00332927	0.0016638	0.000538523	0.0668593	0.000591648	0.000663399	5.55235e-05	0.000925577	0.00152197	6.74662e-05	0.000395738	0.0108321	0.00489222	0.0184225	0.00823403	0.00231667	0.0323299	0.0032782	0.0102816	0.00177513	0.0431437	0.000483166	0	0.000569134	0.000548121	0.000853999	0.00615559	0.000473678	0.00380399	0.00214928	0.000979562	0.00681328	0.00421856	0.372839	0.0354373	0.0166205	0.00326484	0.0486969	0.00367223	0.0058288	0.00109714	0.00863245	0.00407242
DGRP_229	0.002061	0.00713407	0.00438384	0.00265909	0.00230226	0.0085628	0.00309672	0.00115034	0.000550475	0.0474603	0.000383983	0.00108404	0.000599481	0.000933366	0.00263681	0	0.000719133	0.0111132	0.00468338	0.0211076	0.0163844	0.00278558	0.0315546	0.00269734	0.0119222	0.00185348	0.0358912	0.000332751	0	0.000302526	0.000434756	0.00169885	0.00535706	0.00227247	0.00405753	0.00247978	0.00185595	0.00741328	0.00478099	0.347445	0.031913	0.0179007	0.00270586	0.0389994	0.00611531	0.00997206	0.00539134	0.00334349	0.00408075
DGRP_233	0.00256683	0.00420132	0.00196157	0.00208189	0.00137258	0.00469643	0.00182561	0.000531549	0.000356973	0.0558488	0.000257378	0.000117376	0.000103632	0.000429387	0.000609673	0.000293439	0.000192454	0.00791884	0.00125503	0.00884273	0.0094411	0.000870384	0.0167953	0.00227235	0.0117944	0.00199995	0.0798191	0.000343023	3.58183e-05	0.000234198	0.000313112	0.000278713	0.00229729	0.00154334	0.000664614	0.00177852	0.00167892	0.0103664	0.00325923	0.260682	0.0453524	0.0388854	0.00445517	0.0840887	0.00279437	0.00569929	0.00236296	0.0027725	0.00408732
DGRP_235	0.000252008	0.000245894	0	0.00110831	0.000300219	0.00105698	0.000132798	0.0069555	0	0.00344715	0	0	0.000102389	0.000377962	0.000160936	7.42538e-05	0.000330254	0.00218857	8.3881e-06	0.000140397	0.00637318	0.000776733	0.0223912	0	0.0049955	0.0535728	0.0692338	0.000278968	0.000299286	0.000210557	0.000397041	3.07763e-05	0	0.00177043	0.000629226	0.00562843	0.000896553	0.0144492	0.000713336	0.103269	0.222223	0.0297273	0.0767241	0.108871	0.000507419	0.00354034	0.00567569	0.00183241	0.00392806
DGRP_237	0.00233839	0.00550215	0.00265453	0.00185635	0.00173458	0.0142523	0.00217728	0.00137879	0.000301656	0.0533235	0.000516182	0.000488268	0.000223499	0.000748699	0.00279673	0.000681142	0.00112482	0.00992555	0.00170322	0.0116478	0.00771382	0.00205103	0.0358971	0	0.0284583	0.00419167	0.0446769	0.000337704	6.06138e-05	0.000289777	0.000343013	0.000649965	0.00298734	0.000800659	0.00148523	0.00221672	0.0030146	0.00750103	0.00224448	0.242139	0.041398	0.0620848	0.00457649	0.044648	0.00398691	0.00692764	0.00449185	0.00195936	0.00355078
DGRP_239	0.00274717	0.0080174	0.00531603	0.00191362	0.00419423	0.00996763	0.003537	0.00197966	0.00051633	0.0621708	0.00137866	0.00128176	0.000611445	0.00137133	0.00273202	0	0.000672786	0.0123181	0.00589441	0.0344981	0.0197436	0.00512972	0.0469749	0.00439194	0.0140093	0.00251773	0.0517447	0.000585385	0.000344479	0.000655935	0.000823851	0.00259095	0.00707178	0	0.00534692	0.00295777	0.00153168	0.00721936	0.00606002	0.389395	0.0261833	0.0130696	0.00242462	0.0465	0.00497083	0.0042909	0.00143761	0.00436712	0.00252949
DGRP_256	0.00427195	0.0103232	0.00463797	0.00287077	0.00391275	0.0130554	0.00397691	0.00117789	0.00100094	0.0814121	0.000509013	0.00154632	0.000548024	0.00146752	0.00317866	0	0.000485375	0.0130458	0.00692121	0.0369004	0.0186724	0.00505902	0.0445869	0.00679343	0.013738	0.0015429	0.0576842	0.000375183	0	0.000545778	0.000736104	0.00296196	0.00610865	0	0.00347868	0.00253934	0.00211846	0.00914312	0.00738933	0.357012	0.0243971	0.0118645	0.00249693	0.0611489	0.00472526	0.00330978	0.000998994	0.00287384	0.00393206
DGRP_280	0.00222313	0.00569968	0.00203538	0.00171879	0.00244864	0.0138372	0.00242197	0.00236576	0.000547206	0.092832	0.00017727	0.00029803	0.000477345	0.00080458	0.00165432	0.000834749	0.000913585	0.0139436	0.0016546	0.0174283	0.0244403	0.00201515	0.0390563	0	0.0367715	0.00427355	0.10545	0.000261269	0	0.00014428	0.000252596	0.000726426	0.00507077	0.00085509	0.00197697	0.00168152	0.00131994	0.00979571	0.00257129	0.315076	0.0253474	0.0272113	0.00327658	0.0585846	0.00179362	0.00384722	0.000777314	0.002459	0.00245862
DGRP_287	0.0029801	0.00853207	0.00261379	0.00253301	0.00131148	0.00589706	0.0030182	0.000547727	0.000691631	0.0636479	0.0011126	0.000649482	0.00032057	0.000946256	0.00159772	0.000115781	0.000542727	0.012404	0.00435245	0.0162136	0.0123072	0.00256879	0.0212894	0.00380745	0.00905124	0.00158088	0.0524072	0.000459568	0.000396563	0.000978533	0.00105262	0.00118477	0.00473409	0.00136063	0.00522844	0.00352684	0.0018849	0.0116762	0.00576336	0.387227	0.0344594	0.0137935	0.00242223	0.0516984	0.00539427	0.00511927	0.00278026	0.00946709	0.00398974
DGRP_301	0.0011105	0.00435189	0.000616799	0.00115388	0.000765973	0.00288321	0.00199832	0.00067944	0.000448023	0.0541305	0.000234974	0.000192255	0.000131199	0.000491832	0.0012088	0.000200334	0.000214291	0.011764	0.00175136	0.00449127	0.00542069	0.00126766	0.023425	0.00395218	0.0067891	0.00208633	0.0882472	0.000162965	0.000102692	0.000255541	0.000327072	0.000409458	0.00202948	0.0013899	0.000976164	0.00179807	0.00174533	0.0175724	0.00452038	0.202654	0.0491886	0.0187069	0.00345007	0.113895	0.00479806	0.00802917	0.00327392	0.00386136	0.00916057
DGRP_303	0.00342499	0.00790468	0.000552438	0.00349413	0.00051533	0.00317313	0.00423719	0.000589817	0.000850685	0.12491	0.00067669	0	0.000600683	0.000788508	0.000888445	0.000392043	0.000452288	0.0245732	0	0.00220472	0.0376929	0.000655501	0.0140152	0	0.0161154	0.00108034	0.220389	0.000724335	0.000336146	0.000582644	0.000612839	0	0	0.00447753	0.000773228	0.00464179	0.00239233	0.0217011	0.000287674	0.226878	0.0328511	0.0223159	0.0019485	0.0846337	0.000593725	0.00254099	0.00219365	0.00702448	0.00279369
DGRP_304	0.000354938	0.00168075	0.00058723	0.00126585	9.4842e-05	0.00100949	0.00106865	0.00104881	0.000163413	0.0146879	0	0	0.000235766	0.000440252	0.000261007	0.000173312	0.000163677	0.00595393	0.000609908	0.00155109	0.0150818	0.00086617	0.0127607	0.00333514	0.00649987	0.00177493	0.0836916	0.000365533	9.33553e-05	0.000187621	0.000315423	0.000137004	0.00165765	0.0026847	0.00120296	0.00190277	0.00147733	0.0152373	0.0052176	0.28256	0.0519346	0.0252076	0.00402368	0.0888666	0.00349762	0.00627211	0.00361689	0.00341932	0.00528005
DGRP_306	0.000754336	0.00261288	0.000392553	0.00185438	0.00029852	0.00215863	0.00159778	0.000653715	0.000164418	0.0318274	9.74279e-05	0.000101437	0.000214649	0.000343252	0.000964116	0.000101877	0.000309216	0.0112739	0.000803264	0.00248608	0.0122861	0.00102045	0.0151323	0.00331149	0.00891186	0.00200443	0.102262	0.000423438	0.000132109	0.00027032	0.000315205	0.00033292	0.00205948	0.00198004	0.00171374	0.00213747	0.00301261	0.0217742	0.00425431	0.262832	0.0496798	0.0342627	0.00339639	0.0878373	0.00528217	0.00641233	0.00539813	0.00209329	0.00563709
DGRP_307	0.00311727	0.00647041	0.00303758	0.00237449	0.00255295	0.00753624	0.00292841	0.00126807	0.000647598	0.0773204	0.000389851	0.000426201	0.00030668	0.000785083	0.00111255	0.00037506	0.000411737	0.00893611	0.00354555	0.0164754	0.0122067	0.0018432	0.0249499	0.00258712	0.0117622	0.00173889	0.0551398	0.000220132	0	0.000344139	0.000352254	0.000592632	0.00303457	0.00247466	0.00129197	0.00187893	0.00101875	0.00645862	0.00338722	0.299998	0.0370431	0.0189392	0.00357223	0.0510783	0.00270698	0.00770599	0.00309485	0.00401981	0.00303501
DGRP_309	0.00228468	0.00417251	0.00147809	0.00152375	0.00336193	0.00648792	0.00169449	0.0103061	0.000208809	0.0436548	0.000490254	0.000157197	0.000366428	0.00140503	0.000897869	0.000743349	0.0011075	0.00860401	0.00206189	0.00801742	0.0138466	0.000502357	0.0971429	0.00158161	0.0131827	0.0223732	0.0591977	0.000485822	0.000252794	0.000489854	0.000804624	0.000598495	0.00160014	0.00210403	0.00445999	0.00656331	0.00134571	0.0104549	0.00448539	0.190629	0.177824	0.0192472	0.0182972	0.0553401	0.00190259	0.00406872	0.00669088	0.00536567	0.00368521
DGRP_310	0.00280068	0.00702141	0.00273308	0.00207546	0.00305057	0.0105747	0.00237707	0.00168543	0.000449419	0.0922698	0.000237501	0.0004772	0.000620359	0.00100091	0.00143782	0.000658033	0.000588381	0.0147719	0.00314853	0.0166027	0.0241005	0.00292091	0.037283	0.00310566	0.0166989	0.00274999	0.0928048	0.000128919	3.08361e-05	0.000318557	0.000428639	0.000872201	0.00352381	0.00328763	0.00240722	0.00221044	0.00109926	0.00963418	0.00379628	0.311512	0.0211407	0.0163137	0.00179968	0.0549745	0.00285199	0.00602826	0.000642541	0.00772228	0.00337541
DGRP_313	0.000471806	0.00121755	0.000148771	0.00113514	7.46825e-05	0.000438672	0.000714289	0.000494526	0.00055731	0.010651	0	4.9043e-05	0.000147764	0.000295976	0.00022815	0.000181464	0.000103972	0.00531125	0.000458522	0.00211495	0.00619838	0.000684861	0.00886427	0.00373286	0.00616875	0.0011909	0.0887229	0.000263272	7.6998e-05	0.000382302	0.000339019	0.000265207	0.00368963	0.000933186	0.00197049	0.0018763	0.00270777	0.0254198	0.00533421	0.281886	0.0522045	0.0218418	0.00371636	0.132081	0.00484994	0.00645145	0.00470177	0.00329884	0.00950197
DGRP_315	0.000888232	0.00254739	0.000476139	0.00161936	0.000520561	0.00264155	0.00208566	0.000446908	0.000308923	0.0462667	0.000183099	4.29319e-05	0.000262261	0.000386304	0.000408557	0.00043608	0.000269536	0.00865456	0.00168362	0.00503019	0.0171362	0.00165335	0.0196217	0.00402507	0.0161491	0.00196919	0.0999909	0.000253691	0.000148996	0.00028843	0.000297307	0.000330633	0.00453066	0.00326261	0.00216113	0.00199801	0.00153052	0.0105525	0.00587937	0.407897	0.0443953	0.0220441	0.00344978	0.0719359	0.00289269	0.00488953	0.00178115	0.00221316	0.00233605
DGRP_318	0.00288916	0.00914578	0.00239562	0.00284911	0.00154063	0.0053244	0.00309171	0.000507785	0.000743944	0.0673693	0.00126415	0.000506347	0.000600658	0.00111879	0.00160077	0.000233422	0.000319927	0.0207541	0.00355922	0.00996137	0.0353915	0.00171174	0.020642	0.00578708	0.00704107	0.00193916	0.0844245	0.000817921	0.000471346	0.00205014	0.00182928	0.000986046	0.00346245	0.0033137	0.00326628	0.00719649	0.00218889	0.0137997	0.00656269	0.379302	0.0428932	0.0140589	0.00278102	0.0372996	0.0060916	0.00418823	0.00375962	0.0071516	0.00228445
DGRP_320	0.00271183	0.00530816	0.00290153	0.00172505	0.00217761	0.00527368	0.00260292	0.000879321	0.000431974	0.0599717	0.000411388	0.000318565	0.000304564	0.000754009	0.00150757	0	0.00028259	0.0116137	0.0025585	0.0128656	0.0146463	0.00170485	0.0250935	0.00349528	0.0105414	0.0016818	0.0719335	0.000413378	3.13317e-05	0.000331656	0.00040611	0.000481689	0.00237594	0.00193628	0.000815346	0.00187528	0.00120473	0.00940674	0.00475042	0.264188	0.0414265	0.0240466	0.00346205	0.0578044	0.00450415	0.00671765	0.00378475	0.00402508	0.00330555
DGRP_321	0.000667436	0.00230163	0.00068685	0.00176493	0.000695573	0.00241475	0.00166588	0.000490516	0.000282757	0.0237898	0.000300053	0.000231138	0.000176517	0.000550064	0.0012483	0.000159102	0.000193816	0.00706952	0.00156975	0.00382179	0.00895064	0.00108866	0.0184928	0.00267507	0.00829132	0.00198582	0.0547815	0.000367749	0.0002637	0.000491941	0.000541088	0.000488054	0.00232518	0.00189788	0.000980985	0.00258783	0.00292464	0.0120881	0.00535597	0.258222	0.0580834	0.0317293	0.00455907	0.0730451	0.00653172	0.00761405	0.00370233	0.00359892	0.00634408
DGRP_324	0.00205653	0.00533657	0.00219277	0.00173162	0.00160658	0.00485741	0.00318784	0.000756805	0.00074673	0.0609827	0.000817674	0.000515224	0.000393251	0.00088641	0.00158785	6.76675e-05	0.000438647	0.01297	0.00349786	0.010242	0.0125392	0.00170687	0.0252568	0.0030062	0.00846251	0.00175425	0.0737074	0.000528153	0.000344252	0.000788952	0.00089401	0.000814892	0.00344956	0.00242189	0.00231376	0.00328996	0.00185768	0.0117103	0.00527719	0.275962	0.0400399	0.0165908	0.00281816	0.0638419	0.00440675	0.00943631	0.0048263	0.00585142	0.00410844
DGRP_332	0.000881569	0.00189821	0.00055932	0.00127564	0.000440955	0.00192473	0.0019389	0.000726467	0.000281679	0.0259568	0.000169809	0.000100109	0.000167652	0.000335757	0.000698757	0.000207786	8.24011e-05	0.0070074	0.0014153	0.00260623	0.00802738	0.000823106	0.0138718	0.00558106	0.00380288	0.00145339	0.0703627	0.00023564	0.000202695	0.00027078	0.000378193	0.000308352	0.00184096	0.00185004	0.0011587	0.00210526	0.00215157	0.0129413	0.00641533	0.257036	0.055386	0.0171344	0.00320756	0.0808538	0.00624017	0.00744385	0.0050351	0.00270161	0.0057783
DGRP_335	0.00408154	0.00949247	0.00464776	0.00223866	0.00210783	0.0147428	0.00294585	0.00201695	0.000345108	0.0722213	0.00072271	0.000777177	0.000528361	0.00115043	0.00224161	0.000801768	0.00107392	0.0130647	0.00350158	0.0307003	0.0171137	0.00392227	0.0396036	0.00271054	0.0237573	0.00230405	0.0479799	0.00037968	7.57851e-05	0.000608056	0.000676853	0.00160783	0.00650458	0	0.00399527	0.00256661	0.00114502	0.00658484	0.00362747	0.345025	0.0269966	0.0226126	0.00263434	0.0427776	0.0034244	0.00594541	0.0025698	0.00396596	0.00250381
DGRP_336	0.000941636	0.00203103	0.00141039	0.00317675	0.000470497	0.0027772	0.00219484	0.00167799	5.7884e-05	0.023905	0.000242188	8.4671e-05	0.000405445	0.000628956	0.000642972	5.96923e-05	4.95047e-05	0.00611134	0.00180085	0.00527885	0.0155979	0.00110559	0.0139781	0.0041836	0.00425077	0.0012906	0.0530466	0.000569069	0.00017113	0.000359046	0.000419381	0.000305655	0.00311158	0.00315037	0.00107814	0.00229212	0.000547806	0.00833567	0.00554621	0.300462	0.0506245	0.0192558	0.00322523	0.0515934	0.00340232	0.0118538	0.00398213	0.00252325	0.00352568
DGRP_338	0.00122489	0.00533971	0.00140772	0.00243857	0.000277746	0.00154214	0.00227648	0.00184437	0.000272628	0.0296872	0.000563679	9.96587e-05	0.00025256	0.000662448	0.000734645	0.000260144	7.6823e-05	0.0110745	0.00136923	0.00574356	0.00982195	0.000891015	0.00971342	0.00362955	0.00388653	0.000793608	0.0607881	0.000560929	0.000426935	0.000760161	0.000631429	0.000428378	0.00216546	0.00243093	0.00148273	0.00292958	0.00183898	0.0190574	0.00430581	0.236606	0.0474788	0.0191309	0.00364505	0.0774672	0.00534438	0.00929616	0.00919782	0.00621916	0.00721632
DGRP_340	0.00377926	0.00969202	0.0020425	0.00213472	0.00642323	0.0200763	0.00542314	0.00182273	0.00135161	0.10946	0.000494638	8.61627e-05	0.00104348	0.00134628	0.00454593	0.0015817	0.000731153	0.0121193	0.000872776	0.0668843	0.0191381	0.00798478	0.0414579	0	0.0517114	0.00223731	0.0832418	0.000339901	0	0.000518808	0.00036574	0.000499698	0.00312657	0.00226417	0.00394092	0.00263443	0.00265152	0.00872279	0.000657431	0.298125	0.0315975	0.027829	0.00203398	0.0439805	0.000682447	0.00248888	0.00139079	0.00380948	0.00220162
DGRP_350	0.00197495	0.00401942	0.00214481	0.00237949	0.00115726	0.00458317	0.00239684	0.000752436	0.000342503	0.0375689	0.000202102	0.00016496	0.000269445	0.000404377	0.000693458	0.000121377	0.000167153	0.0077994	0.0016257	0.00702763	0.0123861	0.000987183	0.0112257	0.00438375	0.00419691	0.000910605	0.0648967	0.000526536	0	0.000392974	0.000408305	0.000332949	0.00152575	0.00312246	0.000831359	0.00230895	0.0018322	0.0131483	0.00446983	0.252118	0.0501782	0.0187742	0.0035126	0.0780311	0.00366277	0.00885059	0.00614355	0.00377195	0.00487083
DGRP_352	0.000760329	0.00188508	0.000327573	0.00186032	0.000324274	0.00128733	0.00134929	0.000934289	0.0001592	0.0245924	7.33947e-05	0	0.000252637	0.000335882	0.000471993	0.000135881	0.000165092	0.0092205	0.000536618	0.00159485	0.013902	0.000571147	0.00928032	0.00334643	0.00490115	0.00188224	0.123836	0.000318912	0.000185056	0.000312288	0.000326039	0.000219534	0.00167222	0.00286132	0.00107899	0.00225169	0.00221426	0.0224633	0.00402695	0.265373	0.049232	0.0267125	0.00406634	0.10191	0.00374671	0.00682772	0.00473053	0.00248353	0.00531394
DGRP_356	0.0015053	0.00268083	0.00131738	0.00257902	0.00124493	0.00380536	0.00297437	0.000913846	0.000452963	0.0532231	0.000189609	0.000155092	0.000287968	0.000497856	0.000716666	0.000160454	0.000168033	0.00708527	0.00242159	0.00608277	0.0172068	0.00119698	0.0208325	0.0035928	0.00818864	0.00213082	0.0890446	0.000313754	0	0.000237185	0.000336751	0.000308681	0.0023187	0.00239059	0.000748761	0.00193977	0.00117809	0.00721671	0.00620306	0.306753	0.0473769	0.0255879	0.00316589	0.0578101	0.00296289	0.00613232	0.00246951	0.00211119	0.00231718
DGRP_357	0.00351297	0.0046023	0.00175368	0.00187919	0.00153482	0.00475872	0.00258069	0.000812467	0.000782937	0.0844268	0.000139403	0.000247826	0.000185337	0.000324971	0.00053066	2.90291e-05	0.000137574	0.00737504	0.00331442	0.00615433	0.00773405	0.00155988	0.0131808	0.00442185	0.00386932	0.0016337	0.0699217	0.000107868	0	0.000196704	0.000214528	0.000293145	0	0.00348074	0.000655712	0.00153965	0.000934261	0.00909297	0.00338139	0.211536	0.0534424	0.0095261	0.00511899	0.109668	0.00142126	0.00666156	0.00261041	0.00243415	0.00508026
DGRP_358	0.00126754	0.00226908	0.000932834	0.00277632	0.000676174	0.00164493	0.00135192	0.0011858	7.01945e-05	0.0248813	0.000251327	6.0147e-05	0.000274019	0.00040754	0.000398693	0.000138011	5.81685e-05	0.00739305	0.00082803	0.00284649	0.014783	0.000654684	0.00901727	0.00380396	0.00402773	0.00107458	0.0891931	0.000474291	0.000214488	0.000421501	0.00042252	0.000124269	0.00139829	0.00281202	0.000410291	0.00215142	0.00157219	0.0178105	0.00490239	0.247893	0.0575536	0.0276636	0.00378613	0.0930307	0.00382022	0.00780874	0.00538484	0.00451128	0.00476594
DGRP_359	0.00130168	0.0030442	0.00091722	0.00236745	0.00060752	0.00386544	0.00297601	0.000516672	0.000556061	0.0455211	0.000612261	0.000249435	0.000287693	0.000543797	0.00100388	0.000233047	0.000267196	0.0095249	0.00227818	0.00549625	0.0164477	0.00192274	0.0204101	0.00542815	0.00784589	0.00178685	0.0914155	0.000617766	0.000525995	0.000765273	0.000682167	0.000475072	0.00222604	0.00228714	0.00164677	0.00290243	0.0020692	0.0126522	0.00719478	0.284314	0.0582105	0.0179333	0.00375196	0.0735675	0.00493291	0.00553802	0.00494835	0.00575655	0.00359793
DGRP_360	0.00105708	0.0026719	0.00104548	0.00183494	0.000806408	0.00342924	0.0018512	0.00061955	0.000307195	0.0279966	0.00023542	0.000216574	0.000154691	0.000371932	0.000671413	0.000302669	0.000255567	0.00583279	0.0013752	0.00463116	0.00682256	0.00105627	0.0153656	0.00217658	0.00830757	0.0015198	0.0541964	0.000228291	0.000159889	0.000204521	0.000220886	0.000347327	0.00217333	0.00170002	0.000904066	0.00194971	0.00235478	0.0111895	0.00412498	0.222234	0.0546304	0.0364553	0.00425299	0.0791619	0.00403034	0.00907578	0.00648279	0.000726731	0.00582824
DGRP_361	0.00172714	0.00423957	0.00170023	0.00131158	0.00182498	0.0105263	0.00194025	0.00151969	0.000246517	0.0435163	0.00031677	0.00029118	0.000197099	0.000681501	0.00194767	0.000696709	0.000906481	0.00911508	0.00165481	0.0113685	0.00813749	0.00255498	0.0332753	0	0.0280299	0.00291526	0.0532457	0.00035663	7.05595e-05	0.000239062	0.000244503	0.000685691	0.00478683	0	0.00172894	0.00219419	0.00298146	0.00997783	0.00324324	0.272565	0.0514037	0.0486424	0.00562067	0.0611137	0.00389303	0.007332	0.00397528	0.00158137	0.00333359
DGRP_362	0.00102019	0.00269793	0.00100507	0.00135578	0.00066575	0.00241893	0.00180894	0.000715783	0.000233519	0.0269748	0.00012744	0.00021189	0.000132808	0.00043162	0.000815597	0.000178504	0.000123383	0.00745999	0.00143658	0.00379765	0.00547088	0.000772254	0.0128747	0.0047701	0.00453953	0.00150097	0.0693279	0.000143177	0.000215788	0.000403242	0.000352937	0.000452251	0.00355358	0.000363438	0.00127515	0.00152012	0.00287449	0.0202928	0.00617853	0.253867	0.0582995	0.0229308	0.0034702	0.104462	0.00612897	0.00738701	0.00456327	0.00213143	0.0097024
DGRP_365	0.00499977	0.0137285	0.00631025	0.00203937	0.00462042	0.0129475	0.00258326	0.00155416	0.000565921	0.0745077	0.000787841	0.00174042	0.000485426	0.00148595	0.00339242	0.000236515	0.0010382	0.0130289	0.00634684	0.0344703	0.00976638	0.0036804	0.0389702	0.0029665	0.0166704	0.00263023	0.0386618	0.000270812	8.65167e-05	0.000623804	0.000848635	0.00241729	0.00553007	0.000487641	0.00442119	0.00263265	0.00133329	0.00759758	0.00493645	0.33499	0.0256015	0.0202408	0.00232966	0.0431529	0.00640512	0.0060853	0.00349565	0.00506049	0.00457904
DGRP_367	0.00055842	0.00153803	0.000211302	0.00114973	0.000637285	0.00117273	0.000772373	0.0020083	0.00024602	0.0153765	0.000373804	0	2.08424e-05	0.000218239	0.00128191	0.000582727	0.000577229	0.00424119	0.00081928	0.00108224	0.0057874	0.000915747	0.0894511	0	0.00290919	0.0218445	0.0346839	0.000347774	0.000473493	0.000442309	0.000738393	0.000430843	0.000578845	0.00156387	0.00921497	0.00935209	0.000869787	0.00908272	0.0036688	0.12583	0.36753	0.00703378	0.0212933	0.0567678	0.000984622	0.00280455	0.0144128	0.00155717	0.00524892
DGRP_370	0.000932485	0.00205098	0.000368377	0.00323074	0.000261093	0.00113186	0.00113779	0.000527707	0.000126212	0.0201096	0.000376424	8.7038e-05	0.000253371	0.000844724	0.000489542	0.00012783	0.000123909	0.00937984	0.000366048	0.00178942	0.0134339	0.00043509	0.00795181	0.00367494	0.0067654	0.00191432	0.121419	0.000974221	0.00151145	0.00153009	0.00119463	0.000382684	0.00374195	0.00150515	0.00151491	0.00454675	0.00386978	0.0315792	0.00642323	0.280963	0.0572092	0.0382089	0.00415303	0.103475	0.00562658	0.00564057	0.00369169	0.0100275	0.00715226
DGRP_371	0.000547319	0.00218164	0.000632633	0.00162254	0.000587918	0.00192351	0.00158837	0.000453061	0.000237209	0.0271154	0.000613102	0.000150168	0.000221357	0.000589715	0.000860449	0.000213352	0.000191891	0.00904907	0.00127456	0.00304724	0.00928714	0.000743007	0.0174315	0.00335807	0.00616467	0.00180474	0.0706329	0.000460926	0.000718355	0.000408844	0.000580611	0.000400334	0.00291321	0.00231508	0.00138017	0.00305677	0.00256394	0.015185	0.00503225	0.26661	0.0554998	0.025313	0.00362707	0.0795014	0.0061779	0.00960137	0.00481456	0.00396791	0.00654884
DGRP_373	0.00305309	0.00684379	0.00447629	0.00204192	0.00208926	0.00911622	0.00383979	0.00121561	0.00052005	0.0838861	0.000581021	0.000516237	0.000319412	0.000876486	0.00127809	0.000303549	0.00049161	0.00974925	0.00542274	0.0214175	0.0118081	0.00300857	0.0337061	0.0041726	0.013459	0.00188873	0.0534633	0.000311759	0	0.000439009	0.000477284	0.000825089	0.00591061	0.000453233	0.00344098	0.00170711	0.0007917	0.00536335	0.00490849	0.363177	0.0286894	0.0164531	0.00220271	0.045587	0.00304517	0.00617723	0.00176973	0.00472968	0.00207497
DGRP_374	0.00380352	0.00675201	0.00418417	0.00184052	0.00229635	0.00986033	0.00359861	0.00259851	0.000551011	0.0694912	0.000800429	0.000681595	0.00032608	0.0010043	0.00180266	0.000343351	0.000662475	0.0101561	0.00397072	0.0230629	0.010369	0.00295611	0.0383955	0.00275112	0.0157818	0.00213975	0.0503133	0.000319295	0.000182572	0.000664734	0.000421672	0.00109501	0.00477526	0.000492935	0.00324647	0.00151371	0.000812572	0.00752456	0.00409824	0.326317	0.0362293	0.0184645	0.00305049	0.0570885	0.00339443	0.00564029	0.00209663	0.00388263	0.00350877
DGRP_375	0.0057511	0.0073228	0.00203089	0.00305148	0.00244267	0.00599832	0.00179961	0.000565497	0.000688187	0.122128	0.000269201	0.000464728	0.000278656	0.000765948	0.00135415	0	0.000191474	0.0102484	0.00647878	0.0105452	0.0126795	0.00341287	0.0348202	0.00715588	0.00911457	0.0013602	0.103142	0.000295485	2.48068e-05	0.000306195	0.000501875	0.000817766	0.00307783	0.00137244	0.00177196	0.00221091	0.0019621	0.00947166	0.0117617	0.26046	0.0494375	0.0120612	0.00325947	0.0986342	0.00444202	0.0031606	0.000764287	0.00404082	0.00344155
DGRP_377	0.000701976	0.00250375	0.000439828	0.00128935	0.000328336	0.00282102	0.00130972	0.000793923	0.000140495	0.0383982	0.000108752	5.64977e-05	0.000171322	0.000470588	0.000737356	0.000484317	0.000322813	0.010118	0.000649832	0.00286882	0.00886378	0.00103081	0.0225649	0.00235218	0.021743	0.00354768	0.0946517	0.000282081	0.000141405	0.000168343	0.000268431	0.000240596	0.00311469	0.00140016	0.0014233	0.00217538	0.00232085	0.0149381	0.00290653	0.279008	0.048245	0.0474663	0.0052018	0.102376	0.0035281	0.00584404	0.00129272	0.004982	0.00556169
DGRP_379	0.00271358	0.00545013	0.00400982	0.00178998	0.00288093	0.0102579	0.00441366	0.00188709	0.000770379	0.0703295	0.000616824	0.000601977	0.000366015	0.00111324	0.00172478	0	0.000373274	0.0102385	0.005628	0.0304686	0.0140828	0.00341664	0.0405697	0.00956769	0.0101131	0.0016765	0.0897155	0.000441291	0.000305316	0.000933	0.000710984	0.0014967	0.00606605	0	0.00363867	0.00254362	0.00322909	0.0109647	0.00878102	0.365455	0.0315879	0.0115377	0.00222231	0.0660564	0.00306907	0.0036825	0.00149098	0.00395685	0.00295874
DGRP_380	0.00155716	0.0052336	0.00230693	0.00243736	0.00182981	0.00581487	0.00241742	0.000488969	0.000365733	0.046784	0.000555801	0.000498863	0.000371957	0.000780233	0.00223859	5.12913e-05	0.000476477	0.0110149	0.00394911	0.013208	0.0187126	0.00217242	0.0319309	0.00274053	0.0132588	0.00182146	0.0532817	0.00036093	0.000163089	0.000424011	0.000616539	0.000988888	0.00398545	0.00157206	0.00216953	0.00271685	0.00199439	0.00751605	0.00614202	0.321919	0.0344231	0.0274507	0.00214874	0.0344292	0.00611786	0.00738274	0.00526468	0.00287517	0.00276508
DGRP_381	0.00083958	0.00178179	0.000925182	0.00222121	0.000631995	0.00258888	0.001612	0.000405238	0.000176446	0.0244525	0.000477798	0.000108819	0.000421244	0.000697991	0.000764982	0	0.000151544	0.00709288	0.00163705	0.00668377	0.0175839	0.00121338	0.0181531	0.00402457	0.00796227	0.00190472	0.0880477	0.000736263	0.000831245	0.000826197	0.00103322	0.000586355	0.00460491	0.00152827	0.00194348	0.00374525	0.00176583	0.0131574	0.00610151	0.327796	0.0466803	0.025716	0.00398373	0.0811249	0.00354873	0.0068342	0.00313309	0.00537794	0.00397126
DGRP_382	0.00271922	0.00538863	0.00349858	0.00250884	0.00295523	0.00894588	0.00322849	0.00133917	0.000806341	0.0616302	0.000434299	0.000763524	0.000378603	0.00083279	0.00183424	0	0.000370501	0.00960753	0.00565758	0.0216197	0.0194919	0.00296613	0.0317193	0.00513534	0.013472	0.00168949	0.0661884	0.000463316	4.88177e-05	0.000347947	0.000485169	0.00141777	0.00485191	0.000670049	0.00217975	0.00197562	0.0016407	0.00901325	0.00707476	0.353879	0.0338014	0.0153466	0.00325785	0.0702781	0.00356789	0.00418155	0.00135541	0.00250346	0.00327362
DGRP_383	0.00198885	0.00365028	0.00150298	0.00140586	0.00105754	0.0048547	0.00293826	0.000586512	0.000612105	0.0615164	0.000602241	0.000278643	0.000189768	0.000466631	0.00110356	3.54023e-05	0.000247214	0.00816559	0.00258753	0.00848671	0.00949079	0.00188244	0.0232168	0.00414904	0.00818074	0.00219216	0.0684081	0.000462174	0.000195495	0.00046114	0.000453864	0.000398605	0.00191455	0.00163642	0.000977217	0.0023624	0.00154718	0.00746096	0.00420981	0.248587	0.0552754	0.0238936	0.00396277	0.0603244	0.00343963	0.00637213	0.00287027	0.00620165	0.00338376
DGRP_385	0.0030403	0.00763342	0.00254349	0.00105482	0.00181557	0.00720188	0.00266049	0.000807617	0.000502882	0.0739941	0.00188668	0.000449163	0.000219866	0.000896195	0.00244651	0	0.000612377	0.0174732	0.00216483	0.00908818	0.00941515	0.00188477	0.0329862	0.00306173	0.0146084	0.00344815	0.0853235	0.000845735	0.000730952	0.00115723	0.00104243	0.000647133	0.00328456	0.00113924	0.00196275	0.00390931	0.00232952	0.0122798	0.00343045	0.251528	0.0461947	0.0301371	0.00405291	0.0560116	0.00510972	0.0068027	0.00433768	0.00590344	0.00458712
DGRP_386	0.000329844	0.00104862	0.000116787	0.00144108	0.000163982	0.000652263	0.00108407	0.0005265	0.000123669	0.0107545	0	3.3438e-05	0.000154424	0.000428884	0.000322681	0.000162914	2.2049e-05	0.00475983	0.000437137	0.000850826	0.00775022	0.000467553	0.00990877	0.00373356	0.00464263	0.00216768	0.0689031	0.000268466	0.000359051	0.00041123	0.000469771	0.00020139	0.00263647	0.00163828	0.00116684	0.00265068	0.0024112	0.0142664	0.0066105	0.268733	0.0656829	0.0308764	0.00395322	0.0837641	0.00561212	0.00829469	0.00530835	0.00278993	0.00594501
DGRP_391	0.00105893	0.00223386	0.000585275	0.00113056	0.000245687	0.00148262	0.00173524	0.000683542	0.000243709	0.031134	8.14343e-05	4.0862e-05	0	0	0.000310817	8.3799e-05	4.66173e-05	0.0058093	0.000745516	0.00278828	0.00585951	0.000559194	0.00479222	0.00366127	0.00289439	0.00070033	0.0782279	0.000403128	0	0.000260307	0.000101382	0	0	0.00321872	0.000226105	0.00119666	0.00113416	0.0190135	0.00269496	0.210945	0.0473522	0.0143167	0.00513988	0.171813	0.00189143	0.00648281	0.00360989	0.00261522	0.00717088
DGRP_392	0.00300781	0.00551649	0.00354811	0.00222231	0.00294132	0.00727845	0.0028709	0.00076122	0.000530521	0.0656558	0.000430694	0.00048658	0.000331359	0.000705595	0.00114569	0.000396912	0.000396837	0.0102515	0.00328633	0.0139758	0.0160068	0.00194541	0.0259262	0.00261911	0.012626	0.00186853	0.0598434	0.000323784	3.24088e-05	0.000379253	0.000411525	0.000613412	0.00285636	0.00259856	0.00119249	0.00184792	0.00117219	0.00735992	0.00416336	0.308956	0.0387758	0.0233417	0.0035524	0.052124	0.00324757	0.00740646	0.00308032	0.00275847	0.00264897
DGRP_399	0.00260034	0.006065	0.00220084	0.00110506	0.00218399	0.00806506	0.0023832	0.000950878	0.000517217	0.0763596	0.00110041	0.000374823	0.000139416	0.000737153	0.00142086	0.000463653	0.000552252	0.011118	0.00231638	0.0104201	0.00601187	0.00142119	0.0275459	0.000592806	0.0172347	0.00283374	0.0703636	0.000311188	0.000517037	0.000857373	0.00070068	0.000440315	0.00229236	0.000796487	0.000763328	0.00196201	0.00155926	0.0113302	0.00297165	0.208133	0.0461783	0.0355973	0.00558512	0.0850694	0.00289931	0.00660591	0.00316436	0.0062237	0.00582359
DGRP_405	0.00128789	0.00522864	0.00200508	0.00104867	0.00166173	0.00461395	0.00233698	0.00070364	0.000415042	0.0385256	0.000546986	0.000587134	0.000131173	0.000667699	0.00165924	0.000234968	0.000377205	0.0105969	0.00348305	0.00878435	0.00445219	0.00155699	0.0257814	0.00157122	0.0089029	0.00134831	0.0363972	0.000237997	0.000217933	0.000366266	0.000376012	0.00082583	0.00260023	0.00100901	0.00140358	0.00231487	0.00244657	0.0114003	0.0049307	0.194653	0.0485717	0.025085	0.00398337	0.062618	0.00548933	0.00982553	0.00535837	0.00397369	0.00897598
DGRP_406	0.000442887	0.00117233	0.00041368	0.00057562	0.00056593	0.00159826	0.00114447	0.000195178	0.000117827	0.017893	0.000284612	0.000106175	7.66097e-05	0.000451059	0.000739426	0.00023309	0.000143688	0.00701517	0.000746546	0.00230138	0.00435258	0.000810524	0.0218675	0.00247746	0.0093254	0.0020578	0.0799384	0.000324599	0.000452184	0.000461695	0.000558169	0.000284202	0.00241192	0.000446291	0.000579487	0.00264517	0.00352229	0.0168438	0.00479425	0.204035	0.0712548	0.0534926	0.00460525	0.0991261	0.00602354	0.00694697	0.00323518	0.00368957	0.00711014
DGRP_409	0.00206286	0.00480761	0.00172119	0.00208527	0.00156406	0.00470878	0.00293233	0.00091055	0.000567478	0.0630443	0.000729603	0.000307307	0.000242408	0.000845314	0.0013557	0.000212738	0.000266756	0.0125551	0.00304581	0.00747449	0.0132513	0.00152751	0.0236864	0.00430235	0.00935441	0.00334262	0.103093	0.000474067	0.000394134	0.000775949	0.000807333	0.000681384	0.00360061	0.00131342	0.00137473	0.00337913	0.00204995	0.0144891	0.00711649	0.293406	0.0510671	0.0255189	0.00442468	0.0728331	0.00447552	0.00524762	0.00272625	0.00523492	0.00409307
DGRP_426	0.00334286	0.0066196	0.0051333	0.00296473	0.00314961	0.00712232	0.00438501	0.000880757	0.000577449	0.0647139	0.000778855	0.000469974	0.000280325	0.00118269	0.00162048	0	0.000322925	0.00979776	0.00386486	0.0173085	0.0101064	0.00213416	0.0274149	0.00383076	0.0107403	0.00236916	0.0617739	0.000351464	0.000161815	0.000760719	0.000915057	0.000596191	0.00498754	0	0.00120411	0.00317381	0.00155484	0.00791078	0.00690827	0.279171	0.0488425	0.0284268	0.0040266	0.0500286	0.00478813	0.00763081	0.00509813	0.00491357	0.00319447
DGRP_427	0.0033745	0.00946951	0.00421275	0.00144699	0.00289013	0.00799454	0.00406405	0.000898695	0.000808177	0.079061	0.00160381	0.00110063	0.000262782	0.001152	0.00256195	0	0.000467856	0.0160284	0.0059042	0.0155529	0.00688901	0.00256252	0.0330818	0.0043449	0.00999692	0.00217797	0.0584298	0.000598381	0.000353626	0.000980951	0.0010852	0.00120016	0.0039505	0	0.00210413	0.00276587	0.00164367	0.0101508	0.00593332	0.237636	0.0372873	0.0188835	0.00352033	0.0592508	0.00542562	0.0069878	0.0041605	0.00570116	0.00503301
DGRP_437	0.00164916	0.00426328	0.00169447	0.00124512	0.000944732	0.00484076	0.00316689	0.000640705	0.00051014	0.0456672	0.00072233	0.000387276	0.000255411	0.000733098	0.00166762	6.32917e-05	0.000353766	0.0112338	0.00322177	0.00999179	0.00984339	0.00259465	0.0309865	0.00358437	0.00973968	0.00249468	0.0607003	0.000425563	0.000260307	0.000612028	0.000810596	0.00081567	0.00442241	0.000630796	0.00206771	0.00292855	0.00177994	0.0103308	0.00606999	0.261102	0.0403248	0.0200284	0.00312803	0.0599944	0.00473805	0.00902316	0.00373078	0.00518276	0.00462096
DGRP_439	0.00359335	0.00932638	0.00545701	0.00138589	0.004024	0.00960745	0.00353085	0.00103128	0.000491983	0.06172	0.00103819	0.00132661	0.000239582	0.00143705	0.00308879	0	0.000820451	0.0127041	0.00634708	0.0208282	0.00600282	0.00408023	0.0417151	0.00376614	0.0189492	0.00206186	0.0449998	0.000401253	0.00018862	0.000985333	0.00103599	0.00191541	0.00610722	0	0.00467234	0.00317601	0.00265845	0.00999518	0.00690093	0.307098	0.0403494	0.0257281	0.00377257	0.0621451	0.00643824	0.0061527	0.00319703	0.00465823	0.0048624
DGRP_440	0.000362656	0.00118106	0.000169389	0.00120641	0.00106747	0.00142961	0.000554897	0.00543504	3.60276e-05	0.0114078	0.000155273	1.35624e-05	0.000277958	0.00125864	0.000514122	0.000320988	0.000759619	0.00770134	0.000424905	0.00272268	0.0138	0.00153302	0.0709636	0	0.00883698	0.0209131	0.0879003	0.000568135	0.000512808	0.00058904	0.000927008	0.000344553	0.00137004	0.00193471	0.00364357	0.00520303	0.00143453	0.0247696	0.0032107	0.199915	0.140198	0.0196884	0.0165934	0.0938218	0.00216814	0.0042734	0.00715802	0.00598901	0.00804571
DGRP_441	0.00230211	0.00559681	0.00208205	0.00124299	0.00104662	0.00663669	0.00310888	0.00150716	0.000508948	0.056911	0.000624054	0.00039395	0.000132136	0.000792747	0.00176846	9.82153e-05	0.000408136	0.0124099	0.00311735	0.013321	0.00703374	0.00263871	0.0280987	0.00419512	0.0101858	0.00267065	0.0675317	0.000278682	0.000255983	0.000526651	0.000633055	0.000929388	0.00368025	0	0.00240031	0.00221191	0.00177546	0.015559	0.00530881	0.239076	0.0400065	0.0210866	0.00350589	0.0879489	0.00459056	0.00566625	0.00385957	0.00443979	0.00877145
DGRP_443	0.00296711	0.00736405	0.00335085	0.00183015	0.00257483	0.00608383	0.00353737	0.000494471	0.000625325	0.0634807	0.00109991	0.000654207	0.000222869	0.000983938	0.00175735	0.000106348	0.000355195	0.0144202	0.00429461	0.011334	0.00753104	0.00204499	0.0277785	0.00516385	0.00770982	0.00227084	0.0685642	0.000469532	0.000446267	0.000650422	0.000729564	0.000864478	0.00513681	0	0.00241481	0.00309363	0.00215076	0.0137945	0.00726946	0.278863	0.0440307	0.020856	0.00337166	0.064636	0.00581433	0.0076246	0.00494961	0.00312616	0.00522778
DGRP_486	0.00597995	0.0111718	0.00392916	0.00142816	0.00237923	0.0108342	0.00249979	0.00206072	0.000420346	0.0930123	0.000626878	0.000469202	0.000209421	0.000986672	0.00225822	0.000649836	0.000689683	0.0156549	0.00198966	0.0167037	0.00628497	0.0029888	0.0363234	0.00141432	0.0213309	0.00399585	0.0626876	0.000284772	0	0.000408958	0.000500572	0.000753889	0.00336134	0	0.00136086	0.00217297	0.00208865	0.00991097	0.00240324	0.180876	0.0367188	0.0349746	0.00461149	0.0758164	0.00366522	0.00687049	0.00347798	0.00323341	0.00778201
DGRP_491	0.00290857	0.00687046	0.00228594	0.00181116	0.00172046	0.0159191	0.00291124	0.00219603	0.000271658	0.0697628	0.00102913	0.000324104	0.000245824	0.00106623	0.00281966	0.000807845	0.00107756	0.0113908	0.00157808	0.0161134	0.0102391	0.00220115	0.0451132	0.000741278	0.0336052	0.00658826	0.0521076	0.000476188	0.000229968	0.000593982	0.000886561	0.000770767	0.00437332	0	0.00194702	0.00306346	0.00194881	0.00552658	0.00269411	0.27584	0.0385021	0.0482583	0.00381764	0.0346585	0.00384053	0.00650005	0.00330094	0.00354538	0.00205071
DGRP_502	0.00296795	0.00873423	0.00162582	0.00114983	0.00335133	0.0150186	0.00273028	0.00243192	0.000590838	0.101932	0.00104175	0.000322812	0.000229153	0.00116621	0.00310971	0.00103673	0.00102662	0.0178443	0.00178904	0.0151942	0.011283	0.00222357	0.0415263	0	0.0423965	0.0063265	0.105478	0.00050127	0.000285062	0.00064201	0.000713594	0.000958685	0.0044353	0.000461475	0.00182665	0.0031987	0.00250159	0.012884	0.0029561	0.265329	0.0300759	0.0416876	0.00371892	0.0659307	0.00348179	0.00411352	0.00148357	0.00408374	0.00373453
DGRP_508	0.00208389	0.00511246	0.0030694	0.00237063	0.00247289	0.00800582	0.00303586	0.00117282	0.000644238	0.0585463	0.000736836	0.000369454	0.000308312	0.000958858	0.00166795	0.000138041	0.000455877	0.0105443	0.00363907	0.0156605	0.014928	0.002599	0.0327631	0.00311806	0.0121134	0.00269195	0.0620995	0.000393816	0.00018017	0.000656994	0.000787831	0.00070851	0.00400661	0.00116018	0.00176529	0.00264863	0.00107239	0.00763928	0.00565092	0.324202	0.0394172	0.0234199	0.00292997	0.0435701	0.00403673	0.00627557	0.00351251	0.00376209	0.00288697
DGRP_509	0.00171659	0.00338745	0.00084985	0.00243806	0.00293611	0.00347821	0.00155428	0.00738924	0.000404864	0.0475169	0.000495361	0	0.000354799	0.00147739	0.000968206	0.000589596	0.000819592	0.00871234	0.00226219	0.00357593	0.0174414	0.00199019	0.0924669	0	0.00586954	0.0334998	0.0719235	0.000499076	0.00024045	0.000498137	0.000860643	0.000346386	0.00115433	0.00270438	0.00406035	0.0106962	0.00028867	0.00715683	0.00491434	0.177543	0.275176	0.0103974	0.0125504	0.0372265	0.000838536	0.003528	0.00695395	0.00401272	0.00175331
DGRP_517	0.00273872	0.00843617	0.00386291	0.00145159	0.00313457	0.00779036	0.00363391	0.00146472	0.000537883	0.0594453	0.000576633	0.000760255	0.000332437	0.00119504	0.00266485	0	0.000729213	0.0129785	0.00384525	0.0181233	0.0116732	0.00250868	0.0407621	0.00341819	0.0158962	0.00320645	0.0484003	0.000343331	7.06545e-05	0.000578621	0.000749147	0.00142812	0.00744939	0	0.00569386	0.00325468	0.00221117	0.00813027	0.00544035	0.390416	0.0400886	0.0240685	0.00367612	0.0414863	0.00666177	0.00533809	0.00317454	0.00359924	0.00334741
DGRP_530	0.000679634	0.0020755	0.000993494	0.00251843	0.000462961	0.00353166	0.00221056	0.00118558	9.84167e-05	0.0201284	0.000251652	0.000360243	0.000619768	0.000890589	0.00182153	0	0.000469953	0.010109	0.00279814	0.0145755	0.0282977	0.00267306	0.0347574	0.00636965	0.0117473	0.00213641	0.0809448	0.000515234	0.000340554	0.000529465	0.000748977	0.00172315	0.00671609	0.000944242	0.00497303	0.00320792	0.00237344	0.0141733	0.00973242	0.396933	0.0323764	0.0161203	0.00277027	0.0603671	0.00522095	0.0054691	0.00306361	0.0026623	0.00354262
DGRP_531	0.00293933	0.00841496	0.00273608	0.00187023	0.00174683	0.00581014	0.00371475	0.000527709	0.000747214	0.069123	0.000843383	0.000665002	0.000234695	0.000821442	0.00188747	0.000246007	0.000360018	0.0168311	0.00403814	0.0100677	0.0101839	0.001909	0.0235391	0.00500528	0.006905	0.0018922	0.0698211	0.000478681	0.000243861	0.00061364	0.000856821	0.000922454	0.00296589	0.00171254	0.00230078	0.00304688	0.00235888	0.013786	0.00626041	0.285912	0.0401456	0.0175493	0.00282068	0.0576383	0.00627374	0.00656031	0.00551071	0.00533816	0.00482693
DGRP_535	0.000687323	0.003209	0.00131814	0.0011478	0.00109743	0.00407382	0.0015444	0.00119519	0.000165301	0.0321138	0.00107032	0.000198907	0.000231434	0.00117918	0.000985533	0.000357489	0.00036234	0.0111836	0.00170687	0.0104352	0.010007	0.00165279	0.0290778	0.00292736	0.0132368	0.00262633	0.0759987	0.000899807	0.000665681	0.00189805	0.00165017	0.000504941	0.00327827	0.000824823	0.00130405	0.00396492	0.00149722	0.0167108	0.00533791	0.251581	0.0499027	0.0308414	0.00440066	0.0881141	0.0044804	0.00626831	0.00403169	0.0102219	0.00672324
DGRP_551	0.00148231	0.00276226	0.00162682	0.00170679	0.00069831	0.00528075	0.00176513	0.000484624	0.000363903	0.0437731	0.000647147	0.000176497	0.000238423	0.000500643	0.000791012	0.000298151	0.000313717	0.00725313	0.0015099	0.00752138	0.00905042	0.0011951	0.0212077	0.00186066	0.0114751	0.00213843	0.0624131	0.000538986	0.000312747	0.000579529	0.000632894	0.000360199	0.00240839	0.00204588	0.000922896	0.00248895	0.0016585	0.00901146	0.00341046	0.266013	0.0428903	0.0348634	0.00294726	0.063811	0.00326919	0.00871211	0.003944	0.00379745	0.00365408
DGRP_555	0.00192014	0.00670379	0.00322975	0.00136162	0.00136709	0.00685191	0.00294562	0.000538008	0.00061347	0.0487242	0.000679547	0.00112734	0.000255689	0.000842591	0.00284885	5.40574e-05	0.000506103	0.010118	0.00479518	0.0158513	0.00373066	0.00339742	0.0282142	0.00203565	0.00917841	0.00155721	0.0317856	0.000311032	0.000108861	0.00035166	0.000570683	0.0014787	0.00338256	0.00071075	0.0019561	0.00187304	0.0022166	0.00766511	0.00441194	0.192632	0.0336231	0.0171913	0.00241396	0.0538929	0.00640083	0.0117226	0.00535033	0.00224826	0.00865126
DGRP_559	0.00259816	0.00557024	0.00390595	0.000737498	0.00339139	0.00727863	0.00308574	0.00142798	0.000647359	0.0750353	0.000366838	0.000681987	0.000250138	0.000980642	0.00192324	0	0.000441704	0.0110433	0.00438496	0.0135901	0.00644051	0.00217485	0.0485863	0.00190829	0.00965735	0.00520037	0.0618943	0.0002917	8.0456e-05	0.000173714	0.00038193	0.000796338	0.00441695	0	0.00199514	0.00359432	0.00143722	0.00741429	0.0048024	0.235207	0.104988	0.015768	0.00827556	0.0543963	0.00389834	0.00756488	0.00452565	0.00102265	0.00286712
DGRP_563	0.00059209	0.00224646	0.000679874	0.000794731	0.000754454	0.001891	0.00160688	0.000962066	0.00017239	0.0225151	2.86848e-05	0.000180726	0.000110383	0.00044259	0.000815022	0.000251358	0.000200585	0.00786263	0.00125869	0.00311397	0.00491999	0.00106983	0.0135527	0.00236141	0.00565189	0.00134284	0.0613093	0.000134372	0	0.000837223	0.000547499	0.0003955	0.00178025	0.00156327	0.00106577	0.00236471	0.00299861	0.0207453	0.00435643	0.199351	0.0560529	0.0273561	0.00429916	0.107059	0.00584324	0.00835691	0.00561702	0.00349932	0.0105256
DGRP_584	0.00080773	0.00365924	0.000688608	0.00058797	0.000677413	0.00328764	0.0018045	0.000931898	0.00027422	0.0329628	0.000367449	0.000204779	6.64514e-05	0.000554425	0.00151556	0.000158918	0.00031984	0.0112824	0.00125127	0.00380581	0.00387105	0.00124502	0.0188525	0.00259161	0.00864601	0.00269275	0.0770315	0.000245117	0.000347253	0.000426354	0.000483818	0.000377607	0.0026511	0.000267045	0.00101487	0.0018188	0.00229194	0.0226876	0.004594	0.20053	0.0537606	0.0345049	0.00430553	0.105434	0.00656478	0.00750044	0.00501372	0.00401198	0.0111436
DGRP_589	0.00191012	0.00487478	0.00244364	0.00138329	0.00221178	0.00550842	0.00304303	0.00145346	0.000500642	0.0486395	0.00106881	0.000446281	0.00010801	0.000808412	0.00131308	0.00017322	0.000333043	0.0083435	0.00435033	0.0121658	0.00819293	0.00180459	0.0275106	0.00303485	0.0102655	0.00202564	0.0539101	0.000612214	0.000452512	0.000972001	0.000775694	0.000828262	0.00388762	0.00044747	0.00176241	0.00259059	0.00162031	0.00884237	0.00625964	0.273724	0.0483609	0.0244625	0.00411221	0.0684603	0.0040584	0.00612912	0.00342501	0.00457749	0.00473378
DGRP_595	0.00336871	0.00579786	0.00163531	0.00168759	0.00269	0.0113958	0.00405662	0.00126598	0.000723117	0.0773083	0.000505035	2.93674e-05	0.000272096	0.00119758	0.00352827	0.00113793	0.000350223	0.0102607	0.000287014	0.00809401	0.00795125	0.00347075	0.044554	0	0.0320147	0.00242903	0.0801441	0.000319392	0.000169354	0.000562611	0.00045535	7.4943e-05	0.00213399	0.00103083	0.00122183	0.00238639	0.00388091	0.0106837	0.000656431	0.217789	0.0631815	0.0571914	0.00427658	0.0885739	0.000925494	0.00435537	0.00279509	0.00388887	0.00427286
DGRP_639	0.00237933	0.00600006	0.00212194	0.0011889	0.0021533	0.0131633	0.00288824	0.00145731	0.000501537	0.0626988	0.00108132	0.00041176	0.000233872	0.00106835	0.00279247	0.000886935	0.00100735	0.011614	0.00277248	0.0144305	0.00944847	0.00436629	0.0475907	0	0.0318314	0.00383587	0.0563735	0.000385453	0.000273279	0.000732183	0.000799802	0.000845072	0.00351783	0.000800525	0.00172314	0.00291253	0.00233192	0.00754015	0.0040017	0.248532	0.0404852	0.0476478	0.00407179	0.0500988	0.00447883	0.00680459	0.003608	0.00545882	0.00353451
DGRP_642	0.00326452	0.00818545	0.00337601	0.00177104	0.00335919	0.0146666	0.00269347	0.00253511	0.000372595	0.0774377	0.00143629	0.000532635	0.000193471	0.00094964	0.0020842	0.000780607	0.00108471	0.0107603	0.00238021	0.0178223	0.00734755	0.00253963	0.0323149	0	0.0314899	0.00264126	0.044798	0.000452822	0.000353992	0.000662853	0.000497177	0.000824405	0.00291374	0.00090188	0.00171424	0.00223914	0.00233951	0.0077301	0.00214056	0.236826	0.041076	0.0367142	0.00559942	0.0578827	0.00263554	0.00611686	0.00289846	0.00479108	0.00450872
DGRP_646	0.000829594	0.00199026	0.000635476	0.00125061	0.000858701	0.00162306	0.00137206	0.00102599	0.00194165	0.0229379	0.000285055	8.27212e-05	0.000290275	0.00103655	0.000596008	0.000190501	0.000488937	0.00604744	0.00102832	0.00285306	0.0124845	0.000510673	0.0649755	0.00208009	0.00577894	0.0173234	0.0524891	0.000431082	0.000258648	0.000368695	0.000622289	0.000388542	0.00159842	0.00169392	0.00374232	0.00685996	0.00142521	0.0103983	0.00398442	0.173282	0.246397	0.0161723	0.0211238	0.0622147	0.00287704	0.00480309	0.0100641	0.00165324	0.00363241
DGRP_703	0.00155956	0.00409029	0.000985157	0.00194981	0.00106121	0.00304815	0.00260335	0.000361492	0.000557315	0.0605534	0.000407847	0.000186002	0.000130155	0.000474385	0.000820711	0.000119447	0.000100631	0.0111059	0.00191733	0.0039965	0.00754538	0.000924738	0.0148492	0.00399287	0.00522067	0.00142526	0.0899084	0.000417597	0.000299787	0.000503733	0.000405648	0.000286744	0.00147906	0.00182652	0.000581192	0.00233918	0.00207743	0.0162396	0.00421627	0.188633	0.0571126	0.0205241	0.00464923	0.120297	0.002908	0.00652096	0.00292866	0.00390338	0.00743468
DGRP_705	0.00391125	0.00830029	0.00412989	0.00113581	0.0032656	0.0121024	0.00352979	0.00212805	0.000722339	0.0906351	0.000499437	0.000839348	0.000366553	0.00114003	0.00286786	0	0.000651066	0.0131193	0.00661019	0.0418163	0.0129985	0.00474441	0.0540424	0.00433286	0.020288	0.00294081	0.0638261	0.000251007	0	0.000436647	0.000518845	0.0020266	0.00540942	0	0.00358586	0.00178996	0.000739847	0.00630154	0.00608641	0.342516	0.0233629	0.0150285	0.00229295	0.0486962	0.00313692	0.00370319	0.000650478	0.00436779	0.00263057
DGRP_707	0.00248267	0.00439765	0.00201803	0.00257265	0.0011183	0.0116615	0.00180024	0.00241474	0.000222643	0.047839	0.000433021	0.000193642	0.000572616	0.000800645	0.00139948	0.000641331	0.000695256	0.0102685	0.0011392	0.0136082	0.028139	0.00170539	0.0317248	0.00170463	0.0261044	0.00384165	0.0814806	0.000552953	0	0.000611127	0.000752444	0.000632455	0.00327005	0.00261805	0.00205379	0.00338664	0.00180245	0.0104459	0.00325325	0.314761	0.0362652	0.0292171	0.00339326	0.0535161	0.00363836	0.0056377	0.0037258	0.00473795	0.00282072
DGRP_712	0.00182487	0.00622798	0.00195082	0.00137733	0.00150455	0.00435808	0.00219289	0.000627893	0.000438496	0.0454607	0.000820005	0.000454	0.000163042	0.000886087	0.00168773	0.000164044	0.000398404	0.0169999	0.00179959	0.0064677	0.00865287	0.00167537	0.0247655	0.00348959	0.00928846	0.00275672	0.0946584	0.000685971	0.000587781	0.000836942	0.000848959	0.000664534	0.00344119	0.000945742	0.00187883	0.00332415	0.00263472	0.0230551	0.00505729	0.258988	0.0446237	0.0298543	0.00346789	0.0743284	0.00634103	0.00666607	0.00514552	0.00597348	0.00683801
DGRP_714	0.00233026	0.00914027	0.00255556	0.00134526	0.00204937	0.007266	0.00442759	0.00109358	0.000819436	0.0696203	0.00081659	0.000743612	0.000328864	0.00113943	0.00293866	0.000253476	0.000675324	0.0186985	0.00455267	0.0182163	0.0109326	0.00271992	0.0417394	0.00452099	0.0129916	0.00305144	0.069423	0.00038859	0.000211606	0.000542381	0.000911514	0.00185369	0.00555848	0	0.00429457	0.00330659	0.00223253	0.0119452	0.00701486	0.316287	0.0361806	0.0179408	0.00254644	0.0478516	0.00687691	0.00638213	0.00420649	0.00526602	0.00390456
DGRP_716	0.00208004	0.00482356	0.0016076	0.00144137	0.00112243	0.00615122	0.00278728	0.000916844	0.00044788	0.0525834	0.000641256	0.000237676	0.00020599	0.000647165	0.00127983	6.01277e-05	0.000236178	0.0102544	0.00242401	0.00830451	0.0097746	0.00188316	0.0223898	0.00558515	0.00743183	0.00165747	0.0650196	0.000499372	0.000262251	0.000449976	0.000470288	0.000457646	0.00291454	0.00120071	0.00120175	0.0018809	0.00151347	0.0119941	0.00544994	0.249075	0.0441733	0.0201054	0.00305146	0.077896	0.00395439	0.00753515	0.00338555	0.00242914	0.00679733
DGRP_721	0.00244581	0.00698543	0.00428235	0.0025832	0.00194707	0.0079802	0.00238523	0.00128377	0.000392738	0.0562124	0.000333514	0.000508478	0.000347226	0.000843527	0.00168456	0.000247616	0.000451048	0.00964832	0.00369513	0.0288317	0.012306	0.00225611	0.0341817	0.00367754	0.014368	0.00163084	0.050545	0.000218981	0	0.000258368	0.000424799	0.00139128	0.00561298	0.000471891	0.00281857	0.00176359	0.00137969	0.0095103	0.00607061	0.323833	0.0299405	0.0169718	0.00231875	0.0609258	0.00448052	0.0063512	0.00334642	0.00251568	0.00535743
DGRP_727	0.00291203	0.00760423	0.00305354	0.00238925	0.00250911	0.0325907	0.00285581	0.0037646	0.000276498	0.0649588	0.00165717	0.000511747	0.000552767	0.000810858	0.0049568	0.0016617	0.00270579	0.0141095	0.00182831	0.022724	0.0217099	0.00691967	0.0468596	0	0.064005	0.00438943	0.0720204	0.00101605	0.000423099	0.00112221	0.00106741	0.00125568	0.00611182	0	0.00356639	0.00388274	0.00220676	0.0119163	0.0024586	0.30101	0.0259469	0.0365475	0.00300773	0.0553931	0.00272825	0.00416075	0.00184964	0.00588532	0.00280042
DGRP_730	0.00406915	0.00669428	0.0016495	0.00236204	0.0051263	0.0156302	0.00228566	0.00242317	0.000210834	0.104754	0.000549563	0.000301707	0.000318646	0.00140473	0.00307484	0.00100038	0.00117194	0.0136586	0.00181606	0.0100256	0.0167318	0.00260418	0.0511992	0	0.0411278	0.00419871	0.108833	0.000383261	9.94006e-05	0.000482359	0.000597159	0.000649964	0.00230827	0.00194606	0.0014621	0.00302313	0.00288923	0.0100892	0.00301825	0.231535	0.0405807	0.0437519	0.00424873	0.0748286	0.0023379	0.0038204	0.00177572	0.00353583	0.00277126
DGRP_732	0.00136556	0.00294547	0.00110675	0.00179909	0.000940123	0.00292127	0.00199174	0.00180703	0.000347493	0.0369062	0.000335276	0.000133455	0.000187334	0.000548386	0.000630564	0.000128877	0.000311593	0.0061226	0.00205172	0.00576977	0.0067283	0.00137115	0.0311749	0	0.00612262	0.00718234	0.0521982	0.00033683	0.000171473	0.000370846	0.00044885	0.000371159	0.00200299	0.00150916	0.00161044	0.0044724	0.00150096	0.0104611	0.00409284	0.193171	0.173432	0.0184194	0.0140319	0.0773718	0.00253008	0.0065829	0.00776098	0.00223826	0.00459022
DGRP_737	0.00326993	0.0105313	0.00288373	0.00139684	0.00156969	0.00695188	0.00297571	0.00110318	0.000493781	0.0807249	0.000381223	0.000852435	0.000252719	0.000857778	0.00215176	0.000150394	0.000466205	0.0193388	0.00413566	0.0124943	0.00966971	0.00251783	0.0269894	0.00569222	0.00988999	0.00167901	0.081934	0.000198578	0	0.000341275	0.000394397	0.00125264	0.00442884	0.000471223	0.00300576	0.00236559	0.00217964	0.0157854	0.00582936	0.289177	0.0401391	0.0176382	0.00316605	0.0697647	0.00629698	0.00546767	0.00385044	0.00441429	0.00490917
DGRP_738	0.000783244	0.00198411	0.000580413	0.00203213	0.000451482	0.0021644	0.00148241	0.000258984	0.000265373	0.0235311	0.000283002	5.79999e-05	0.000279845	0.000563134	0.000801042	0.000190416	0.000215306	0.00864936	0.000908054	0.00307835	0.0136365	0.000734637	0.0170437	0.00297451	0.00991666	0.00308754	0.0840948	0.000560857	0.000300101	0.000569531	0.000795348	0.000347413	0.00435852	0.0010507	0.00142135	0.00299091	0.00248406	0.0172523	0.00611634	0.319801	0.0523807	0.0448793	0.00314139	0.0678448	0.00580692	0.00758828	0.00428429	0.00314652	0.00492763
DGRP_748	0.00130157	0.00404835	0.000690076	0.000507086	0.000789838	0.00486049	0.00145017	0.00114917	0.000191092	0.0529447	0.000940114	0.000118108	2.50383e-05	0.000692343	0.00135878	0.000457289	0.000429413	0.0127229	0.000669625	0.00350703	0.00348356	0.000941902	0.0217531	0.000497939	0.0180901	0.00469162	0.102322	0.000450502	0.000706322	0.000942168	0.000883978	0.000259047	0.00283706	0.000301604	0.000915376	0.00290941	0.00313185	0.0199978	0.00222872	0.187915	0.0461059	0.0667705	0.00561659	0.121571	0.0033107	0.00610037	0.00249414	0.0066024	0.0087355
DGRP_761	0.00136613	0.00396007	0.00133506	0.00095165	0.000999752	0.00420311	0.00242387	0.000838225	0.000396547	0.0420981	0.000386565	0.000288548	2.98504e-05	0.000621391	0.00135828	0.000223281	0.000261263	0.0107189	0.0019752	0.00594707	0.00424784	0.00104719	0.0200161	0.00306607	0.00778559	0.00252678	0.0676184	0.000315712	0.000174183	0.000371131	0.00051516	0.000521393	0.00291114	0.000357019	0.00102386	0.00238267	0.00239076	0.015725	0.00472646	0.195169	0.0536845	0.0309878	0.00443241	0.0907467	0.00548056	0.0077157	0.00434686	0.0028136	0.00915335
DGRP_765	0.00330163	0.0101443	0.00193831	0.0017544	0.00295769	0.0163171	0.00363196	0.00280064	0.000149776	0.105557	0.00197162	0.000421792	0.000444537	0.00153037	0.0029508	0.00131547	0.00142797	0.0233265	0.00282615	0.0118482	0.0200711	0.00303782	0.0420352	0.00269468	0.0469422	0.00507556	0.117506	0.00100789	0.000627456	0.00155222	0.00127893	0.000966779	0.00275957	0.0017712	0.00225142	0.00493819	0.00210121	0.0135156	0.00426381	0.244069	0.0295043	0.046851	0.00341856	0.0522611	0.00325045	0.00374358	0.00214429	0.00644123	0.00263363
DGRP_774	0.0030006	0.00965937	0.00204768	0.00133638	0.00251187	0.00769023	0.00238436	0.00123226	0.000629562	0.0826735	0.000975668	0.000651473	0.000253463	0.00117574	0.00376557	0.000272603	0.000983255	0.0210307	0.0025006	0.0110579	0.00918994	0.00236356	0.0387508	0.00138044	0.0186101	0.00307553	0.0770792	0.000653242	0.000151263	0.000655449	0.000681764	0.00103258	0.0029876	0.000919041	0.0022514	0.00289972	0.002883	0.0146971	0.00318091	0.208766	0.0387216	0.0328202	0.00430155	0.0750689	0.0053452	0.00664858	0.00457049	0.00469696	0.007432
DGRP_776	0.000268675	0.00106768	0.000103898	0.000504571	0.000531612	0.000669633	0.000338149	0.00145336	0.000172727	0.00352302	0	1.87109e-05	0.000189282	0.000391793	0.000261887	0.000235066	0.000236686	0.0034685	0.000328157	0.00176293	0.00782541	0.00276343	0.0170179	0.000596345	0.00458052	0.005337	0.0319932	0.000222929	1.31262e-05	0.000435352	0.000448959	0.000265974	0.00138347	0.00215105	0.00132005	0.00401057	0.00233066	0.0237428	0.00313104	0.166546	0.0897696	0.0199147	0.0123883	0.0913837	0.00302545	0.00902827	0.00766843	0.00380235	0.0203072
DGRP_783	0.00261461	0.00905589	0	0.000705771	0.0037935	0.0773917	0.00334006	0.00972901	0.000175683	0.0841176	0.00175561	0	0.000256023	0.00162728	0.00946896	0.00373653	0.00546821	0.0190258	4.37543e-05	0.000118776	0.00855445	0.00498131	0.0534678	0	0.17623	0.0202981	0.0722425	0.000536105	0.000379722	0.00127923	0.0013536	0	0	0.00118125	0	0.00303551	0.00424091	0.0109131	0.000795096	0.0522502	0.0166966	0.161185	0.0105233	0.0610856	0	0.00123316	0	0.00715055	0.00537534
DGRP_786	0.00162758	0.00654135	0.00229371	0.000994858	0.00201053	0.0116535	0.00403595	0.00147337	0.000386889	0.0505548	0.00115794	0.000707	0.000126935	0.00104006	0.00354625	0.00058457	0.00123302	0.0139549	0.0037925	0.0117824	0.00539157	0.00348335	0.0408183	0.00132253	0.0314917	0.00374294	0.0435681	0.000541128	0.000329017	0.000614191	0.000727783	0.00117815	0.00365232	0.00060067	0.00361731	0.0023816	0.00308532	0.0100224	0.00374453	0.250379	0.0399385	0.0488923	0.00344598	0.0571291	0.00787662	0.0059653	0.00406053	0.00425742	0.00602269
DGRP_787	0.0016967	0.00806819	0.00215261	0.000951911	0.0016544	0.00500134	0.00256416	0.00101681	0.000443174	0.0466129	0.0004517	0.000960503	0.000256019	0.00105499	0.00270361	0.000227363	0.000544128	0.0195833	0.00479799	0.0101722	0.00691959	0.00306749	0.0348722	0.00495761	0.00884175	0.00164002	0.059893	0.000304446	0.000112562	0.000458644	0.000693278	0.00157146	0.00542973	0	0.00523439	0.00233659	0.00285754	0.0192915	0.00890321	0.271759	0.044539	0.0169255	0.00294925	0.0710239	0.00953153	0.00742539	0.00594268	0.00309721	0.00827892
DGRP_790	0.00477265	0.0089944	0.00115781	0.00102412	0.00194538	0.00537413	0.001539	0.00139352	0.000461899	0.15211	0.000348775	0.00047559	0.000161575	0.00108956	0.00176791	0.000242727	0.000176067	0.0222692	0.00477224	0.00551485	0.00804907	0.00279174	0.0378761	0.00775803	0.00755828	0.0016358	0.171406	0.000204233	2.34567e-05	0.00047254	0.000676562	0.000934257	0.00158664	0.00132044	0.000892275	0.00269434	0.00177908	0.0180599	0.00811081	0.152278	0.037113	0.0123598	0.00213188	0.115885	0.00410559	0.00356955	0.001104	0.00400893	0.00523766
DGRP_796	0.00275817	0.0056218	0.00122127	0.0012027	0.00191895	0.00511584	0.00178209	0.000368437	0.000663567	0.100987	0.000142234	0.000403184	0.000119012	0.000664465	0.0011804	0.000213977	0.000124378	0.0129797	0.00436869	0.00561379	0.00607549	0.00185461	0.030209	0.00862519	0.00616472	0.00150217	0.140413	0.000103363	1.66678e-05	0.00025437	0.000472502	0.000772286	0.00236299	0.000757468	0.00112628	0.00216956	0.00246845	0.017942	0.00956786	0.188927	0.0529617	0.00948286	0.00250121	0.147109	0.00447934	0.0036788	0.00114826	0.00356823	0.00643458
DGRP_799	0.00165754	0.00545621	0.00241017	0.00127915	0.00120611	0.00529266	0.00216606	0.00171025	0.000175704	0.0394545	0.000612233	0.000782434	0.000203599	0.000818405	0.00203297	0.000128822	0.000450428	0.011603	0.00299886	0.0121162	0.00784556	0.00190791	0.024473	0.00343075	0.00938365	0.00195674	0.0475438	0.000327228	0.000215356	0.000504207	0.000471652	0.00143921	0.0049877	0	0.00324152	0.00239155	0.00219981	0.0144764	0.00560926	0.301511	0.0386376	0.0238657	0.00307276	0.0738994	0.00771004	0.00659945	0.00497338	0.00247861	0.00907301
DGRP_801	0.00214923	0.00638192	0.00309322	0.00174389	0.00218293	0.00903991	0.00324062	0.00197551	0.000517644	0.0532645	0.000644838	0.000738434	0.000353397	0.00130112	0.00302507	0	0.000832895	0.0118492	0.00422444	0.0206058	0.0112586	0.00373611	0.0453597	0.00372549	0.0173465	0.00286648	0.0555183	0.000271283	0.000174594	0.000559299	0.000700386	0.0017716	0.00675351	0	0.00518106	0.00285662	0.00204892	0.0108517	0.00738399	0.365166	0.0342072	0.0240299	0.00257158	0.0518165	0.00640331	0.00535438	0.0027279	0.00312468	0.00436121
DGRP_802	0.000546747	0.00144847	0.000109139	0.00103139	0.000250456	0.000715296	0.000784389	0.00113807	0.000126706	0.0101821	7.8729e-05	0	0.000304684	0.000512291	0.000201783	0	4.44323e-05	0.00507609	0.000495175	0.000964054	0.0157392	0.000681753	0.0245076	0	0.0036174	0.0162376	0.0595033	0.000648481	0.000497208	0.000810054	0.000833621	0.000966895	0.000364695	0.00192891	0.00112818	0.00653026	0.00109016	0.014873	0.00501306	0.184644	0.234057	0.0243481	0.0205048	0.085612	0.00224529	0.00507338	0.00913777	0.00342154	0.00672956
DGRP_804	0.00280523	0.00753844	0.00263613	0.00220559	0.00155542	0.0075479	0.00344983	0.000960798	0.000543004	0.0709974	0.000948304	0.000476888	0.000304545	0.00105015	0.00205005	0	0.000559047	0.0177451	0.00291966	0.0127602	0.0144267	0.0025313	0.0292857	0.00458409	0.0134799	0.002522	0.0833815	0.000520908	0.000294019	0.000602894	0.000883436	0.00106277	0.0045302	0.000512488	0.00306698	0.00359395	0.00196766	0.0155827	0.00507582	0.292812	0.0360323	0.0210862	0.00312039	0.0699974	0.00444742	0.00576052	0.00358776	0.00637188	0.00485162
DGRP_805	0.00246932	0.0054837	0.00445596	0.00220929	0.00341168	0.00925624	0.00343788	0.00108488	0.000379616	0.0561156	0.000813524	0.00072849	0.000375982	0.00108162	0.00193918	0	0.000529048	0.0090156	0.00569896	0.0179153	0.0152252	0.00386154	0.0352337	0.00389583	0.013277	0.00187393	0.0506095	0.000449988	0.000145033	0.000627034	0.000789049	0.00110449	0.00534183	0.000595846	0.00245341	0.00308908	0.001459	0.00592867	0.0075075	0.319979	0.039189	0.0226867	0.00255039	0.0386005	0.0046148	0.007919	0.00392857	0.00445398	0.00245201
DGRP_808	0.00354656	0.00898621	0.0021142	0.00264146	0.00125599	0.00807626	0.00311183	0.00127079	0.000444321	0.1034	0.00086409	0.000407456	0.000333313	0.000868236	0.00226944	0	0.000527667	0.0185212	0.00322388	0.0118102	0.0181431	0.00295381	0.0294573	0.00464911	0.0154733	0.00198732	0.113517	0.000500432	0.000156325	0.000602182	0.000633904	0.000873958	0.00296547	0.00167526	0.00190297	0.00245632	0.00127576	0.0134773	0.00571752	0.29219	0.0285958	0.0254155	0.0022563	0.06663	0.00395996	0.00449781	0.00242808	0.002959	0.00325038
DGRP_810	0.00131793	0.00373433	0.00109356	0.00136156	0.00078319	0.00687209	0.00148904	0.000999844	0.000289121	0.0436012	0.000536261	0.000181827	0.00014791	0.000596124	0.00152477	0.000455054	0.000548922	0.00949988	0.00114732	0.00628014	0.00811974	0.00166844	0.0244059	0	0.0172976	0.00277361	0.0613366	0.000398536	0.000260596	0.000336551	0.00040605	0.000341601	0.00193644	0.00201127	0.000633371	0.00203069	0.00228843	0.0119053	0.00242482	0.225561	0.043367	0.0538541	0.00468998	0.0698064	0.00354544	0.00974143	0.00352769	0.00296206	0.00574677
DGRP_812	0.00210699	0.00589264	0.00257091	0.00188482	0.00149813	0.00794189	0.00210728	0.000736875	0.000416658	0.0559558	0.000496992	0.000480386	0.000256485	0.00070294	0.00173752	0.000490568	0.000753096	0.0118983	0.00230739	0.0118215	0.0103629	0.00189916	0.0284079	0.000354785	0.0169977	0.00274302	0.054366	0.000270633	3.21135e-05	0.000377193	0.000517578	0.000638625	0.00278235	0.00239487	0.00198072	0.00248869	0.00181624	0.00875561	0.00291131	0.295447	0.0378761	0.0333682	0.00424906	0.0498294	0.00385488	0.0084402	0.00445178	0.00471507	0.00361378
DGRP_818	0.00439993	0.0118956	0.0048265	0.0024388	0.0034739	0.0135845	0.00544176	0.000786361	0.000801243	0.0762412	0.00208329	0.00034779	0.000533397	0.00201889	0.0067846	0.0009931	0.000577364	0.0169541	0.000322448	0.0159307	0.00801732	0.00410269	0.0409413	0	0.0266427	0.00136307	0.0577297	0.00081839	0.00040773	0.00189349	0.00142345	0.000308626	0.00451451	0.000437529	0.00316211	0.00374584	0.00371033	0.012018	0.000538345	0.257661	0.0409549	0.0410709	0.00237273	0.0615956	0.00174792	0.00692835	0.00637111	0.00763022	0.00530183
DGRP_819	0.00104952	0.00339874	0.000943834	0.00187279	0.000467341	0.00238212	0.00199987	0.000254623	0.000394346	0.0365534	0.000309591	0.000167466	0.000247898	0.00034992	0.000669312	0.000152717	0.000169844	0.0104693	0.00168395	0.00334743	0.0152333	0.000853393	0.0141899	0.00544188	0.00407095	0.00139756	0.0955655	0.000589911	5.72743e-05	0.000330448	0.000397241	0.000291584	0.00165584	0.00304544	0.00102961	0.00249164	0.0019407	0.0151354	0.00613592	0.27915	0.0488318	0.0191526	0.0029696	0.0720287	0.0041781	0.00755704	0.00521184	0.00380335	0.00449987
DGRP_820	0.00528451	0.00969718	0.00593727	0.00191853	0.00395368	0.0128409	0.00263949	0.00231916	0.000346145	0.101894	0.00046316	0.00115535	0.00044735	0.00121042	0.00205044	0.000502346	0.000727032	0.0136648	0.00473476	0.0253482	0.0156362	0.00423036	0.039302	0.00378065	0.0191599	0.00269483	0.0747563	0.000321167	0	0.000322229	0.000432262	0.00142112	0.00513193	0.000711502	0.00276023	0.00229406	0.0013764	0.00872375	0.00413275	0.305031	0.0324991	0.0192206	0.00342365	0.0667523	0.00291669	0.0046114	0.00172283	0.00284672	0.00168683
DGRP_821	0.00308778	0.00726006	0.00629399	0.00198642	0.00300063	0.00877377	0.00389325	0.000984811	0.000569254	0.0585711	0.0010948	0.00149337	0.000412988	0.00107594	0.0023747	8.5524e-05	0.000500977	0.010911	0.0074597	0.0245652	0.0125745	0.00329537	0.0326798	0.00414728	0.00953991	0.00202751	0.0432634	0.000425644	0.000144943	0.000635937	0.00070541	0.00183336	0.00574903	0	0.00317235	0.00295106	0.00150855	0.00588591	0.00662469	0.312048	0.0369549	0.0155792	0.00282023	0.0360102	0.00627724	0.00786373	0.00513922	0.00413458	0.00277924
DGRP_822	0.00161908	0.00253843	0.00135068	0.0019185	0.000824424	0.0048551	0.00278887	0.00139798	0.000348921	0.0574396	0.000486334	4.8131e-05	0.000264593	0.000606571	0.000536967	0.000305669	0.000314515	0.00741863	0.00244184	0.0100638	0.0154625	0.00188901	0.0221008	0.00477735	0.0135625	0.00208856	0.109822	0.000428665	0.000250151	0.000628927	0.000535882	0.000488986	0.00286461	0.00196968	0.00162878	0.00229983	0.00098174	0.011047	0.00590008	0.314381	0.0371179	0.0205497	0.00351799	0.0916082	0.00196815	0.00482036	0.0017493	0.0042889	0.00303747
DGRP_832	0.00328126	0.00691113	0.00650105	0.00303843	0.00448202	0.0131866	0.00376291	0.00222126	0.000425569	0.0675925	0.00129891	0.00112586	0.000667196	0.00163954	0.00251252	0.000295058	0.000718607	0.0107833	0.00659651	0.0402627	0.0231254	0.00399066	0.0487601	0.00363188	0.0187923	0.00244224	0.0521143	0.000473338	0.000205043	0.000577337	0.000819928	0.00233785	0.00774398	0	0.00431529	0.00279477	0.000966654	0.00579	0.00648147	0.377243	0.0187141	0.0150291	0.00176424	0.0378666	0.00349478	0.00492921	0.00142197	0.00342833	0.00224421
DGRP_837	0.00500395	0.0124732	0.00495295	0.00141741	0.00440219	0.0100072	0.00385904	0.00073294	0.00121859	0.103295	0.000861897	0.00120619	0.000183035	0.00117557	0.00232402	0.000153562	0.000312559	0.0139454	0.00788084	0.0206956	0.00522304	0.00295019	0.0318302	0.0057106	0.00848811	0.00194589	0.0632383	0.000366751	9.05323e-05	0.000957096	0.00120316	0.00156943	0.00467646	0	0.00193682	0.00306447	0.00208129	0.0114181	0.00737592	0.262033	0.045124	0.0163496	0.00323462	0.0678528	0.00568603	0.00574681	0.00270035	0.00498713	0.00566976
DGRP_843	0.00457845	0.00751808	0.00328838	0.00254147	0.00306835	0.00950221	0.00359117	0.00115168	0.000691073	0.092922	0.000856378	0.000608028	0.000291494	0.000831998	0.00187081	0	0.000562961	0.0115442	0.00518964	0.0143508	0.0120706	0.00275092	0.028566	0.00428631	0.0128406	0.00199789	0.0727427	0.000356628	0.000222021	0.000583877	0.000597515	0.000852953	0.00264906	0.00172491	0.00204792	0.00242311	0.00147683	0.00818317	0.00632717	0.277442	0.0493485	0.0213771	0.00346379	0.0555473	0.00423427	0.00564731	0.00497165	0.00392496	0.00271211
DGRP_849	0.00251547	0.00892999	0.00440797	0.00159241	0.00431134	0.011322	0.00240524	0.00126576	0.00039082	0.0701931	0.00140368	0.00105936	0.000191542	0.00148196	0.00273819	0.000729521	0.000928567	0.0128318	0.00464268	0.0175916	0.00660388	0.00321972	0.0400424	0.0024759	0.0204369	0.00287824	0.0582089	0.000470916	0.000303803	0.00109246	0.00108633	0.00127534	0.00560913	0	0.00271353	0.00293494	0.00209915	0.0129177	0.00541825	0.269908	0.0439994	0.0285606	0.00400196	0.0780508	0.00560142	0.00663521	0.00296718	0.00596954	0.00678784
DGRP_850	0.000947782	0.00409499	0.00138909	0.00241915	0.000658127	0.00330019	0.00153962	0.00071376	0.000268284	0.0280744	0.000298314	0.00014289	0.000253212	0.000540279	0.000935355	0.000116864	0.000213472	0.00980268	0.00137543	0.0077978	0.0129941	0.000941738	0.0182669	0.00343368	0.00764595	0.00141099	0.0587334	0.000351621	0.000172268	0.000401417	0.000472152	0.000399249	0.00296041	0.00184877	0.00117558	0.00225284	0.0018983	0.0146127	0.00547435	0.293346	0.0472879	0.0270523	0.00302856	0.0595566	0.00537309	0.00825772	0.0060834	0.00341119	0.00520493
DGRP_852	0.00229524	0.00722797	0.00291712	0.00258339	0.00350076	0.0103004	0.00275462	0.00259905	0.000298377	0.0888588	0.000587707	0.000576127	0.000488307	0.00112314	0.00181571	0.000740452	0.000791912	0.0141682	0.00358509	0.0198363	0.020338	0.00377566	0.037979	0.00215703	0.0237369	0.00303041	0.0726191	0.000463328	0	0.000268415	0.000357016	0.00103478	0.00461085	0.000759746	0.00266628	0.00154758	0.000808037	0.00892852	0.00384502	0.296764	0.0214912	0.0191089	0.00243985	0.0659117	0.00250171	0.0049821	0.00117782	0.00312893	0.00484034
DGRP_853	0.00149112	0.00525346	0.00293574	0.00309964	0.0024989	0.00945454	0.00311534	0.0015858	0.000507	0.0552511	0.00081615	0.000532084	0.000616192	0.00160648	0.00174632	0.000732247	0.000949886	0.0111537	0.00518128	0.0297419	0.0252643	0.00529462	0.0503313	0.00388256	0.0196724	0.00272544	0.0590994	0.000520175	0.000140105	0.00075794	0.000911097	0.00185389	0.00737494	0	0.00576975	0.00353454	0.00106157	0.00730248	0.0078644	0.389696	0.0261896	0.019462	0.00246362	0.0446602	0.00397813	0.0046663	0.00204257	0.00635324	0.00250074
DGRP_855	0.00194887	0.0045154	0.00315711	0.00177772	0.00152205	0.00699231	0.00307458	0.00125167	0.000389664	0.0537649	0.000248793	0.000563952	0.000226045	0.000471072	0.00121413	0.000285991	0.000497402	0.00847941	0.0041656	0.0160661	0.0100396	0.00314326	0.0220357	0.0023417	0.0138042	0.00168462	0.0509957	0.000171176	0	0.000174201	0.000159199	0.000812956	0.00273371	0.00152307	0.00178383	0.00131605	0.00131854	0.00838496	0.00489639	0.278219	0.0423716	0.0261879	0.00374095	0.065514	0.00356065	0.00691548	0.00507846	0.000661257	0.00414516
DGRP_861	0.000778539	0.00259773	0.000487267	0.00173092	0.000392954	0.00158716	0.00125343	0.000347598	0.000112559	0.0207239	0	3.13501e-05	0.000115899	0.000231231	0.000316889	0.000128227	0.000160148	0.00898647	0.000754912	0.00211258	0.0113321	0.000692156	0.00815575	0.00337938	0.00659124	0.00186844	0.117987	0.00021443	0.000180237	0.000176722	0.000243406	0.00034274	0.00254593	0.00213263	0.00150347	0.00220643	0.00263376	0.0287139	0.00582096	0.271653	0.0501952	0.0321499	0.00402677	0.111496	0.0040013	0.00612054	0.00466326	0.00236583	0.00796137
[truncated: 8 more columns]

## Sheet: B
DGRP Line	n-C21 (1)	x-C22:1 (2)	x-C22:1 (3)	n-C22 (4)	2-Me-C22 (6)	NI (7)	9-C23:1 (8)	7-C23:1 (9)	6-C23:1 (10)	5-C23:1 (11)	n-C23 (13)	x,y-C24:2 (16)	3-Me-C23 (17)	7-C24:1 (18)	6-C24:1 (19)	5-C24:1 (21)	n-C24 (22)	2-Me-C24 (25)	6,10-C25:2 (26)	9-C25:1 (27)	7-C25:1 (29)	5-C25:1 (31)	n-C25 (32)	2-Me-C25 (39)	3-Me-C25 (41)	7-C26:1 (42)	6-C26:1 & i (43)	n-C26 (44)	2-Me-C26 (46)	9-C27:1 (47)	7-C27:1 (48)	n-C27 (50)	2-Me-C27 (52)	NI (54)	n-C28 (55)	2-Me-C28 (57)	7-C29:1 (59)	n-C29 (60)	2-Me-C29 (61)	2-Me-C30 (62)	n-C31 (64)
DGRP_21	0.022717	0.00486372	0.00147155	0.0285928	0.00485524	0.00102124	0.0178528	0.508577	0.000826882	0.0192487	0.132913	0.00191656	0.00265737	0.0163048	0.00300855	0.00381564	0.00605638	0.0426061	0.00366286	0.0173527	0.0428455	0.000847774	0.0162343	0.00173982	0.00264276	0.000145202	8.71223e-05	0.00135922	0.0485572	0.000368739	0.000829777	0.00614065	0.000935409	0.00229969	0.000610359	0.0260963	0.000272635	0.00156032	0.00105709	0.00417336	0.000509626
DGRP_26	0.0284887	0.00401856	0.00210593	0.0350838	0.00350313	0.000861083	0.01997	0.386019	0.00250303	0.0158072	0.159577	0.0014448	0.00308755	0.0163298	0.00232843	0.00390702	0.009245	0.0489258	0.00462912	0.0135496	0.0318991	0.000848441	0.0281364	0.00191985	0.00430435	0.00023703	2.5673e-05	0.00317245	0.081233	0.000753181	0.000994488	0.0142677	0.00140299	0.0051464	0.00144736	0.0479542	0.000399375	0.0036059	0.00334724	0.0063966	0.000630789
DGRP_28	0.0142825	0.00307258	0.000924958	0.01849	0.00304988	0.00065287	0.0193502	0.422403	0.000907847	0.019968	0.124302	0.000728873	0.00243971	0.0151052	0.00385403	0.00615994	0.00617343	0.0299172	0.00719574	0.0234738	0.0946014	0.00172768	0.0173559	0.001582	0.00299919	0.000339375	0.0001878	0.00124096	0.0720422	0.000598717	0.00225043	0.00736763	0.00135743	0.00396575	0.000767474	0.0553344	0.000381641	0.00236692	0.00239117	0.00804418	0.000373143
DGRP_31	0.00367196	0.00353024	0.00053552	0.0115538	0.00155706	0.000889013	0.0170053	0.291102	0.00348671	0.0296865	0.129378	0.000646008	0.00200456	0.00970951	0.00617825	0.00653652	0.0103497	0.0260511	0.00925393	0.0428397	0.163953	0.00379708	0.0441384	0.00157676	0.0011452	0.000694899	0.000504501	0.00352636	0.0791082	0.00191289	0.00417556	0.0189744	0.0015162	0.00201578	0.00137447	0.052383	0.000305036	0.00397356	0.000857516	0.00697853	0.000750637
DGRP_38	0.00793942	0.00250965	0.00047939	0.0153875	0.00148596	0.000580673	0.0149097	0.266868	0.00298696	0.0311115	0.126071	0.000611264	0.00170839	0.0127792	0.00554915	0.00757791	0.00945124	0.0231891	0.00410201	0.0331708	0.185643	0.0030642	0.0383685	0.00134566	0.00176494	0.000733423	0.000437326	0.00476742	0.0656865	0.00154872	0.00649991	0.0284826	0.00142866	0.00296351	0.00266702	0.0579457	0.000720196	0.00940068	0.00271909	0.0135328	0.00125442
DGRP_40	0.0135601	0.00451273	0.00199073	0.0278674	0.00377883	0.000673968	0.0312281	0.396098	0.00087133	0.0263409	0.14278	0.00114141	0.00376476	0.0194797	0.00435668	0.00801381	0.00868155	0.0293781	0.00648816	0.0301218	0.0955153	0.00210009	0.0189382	0.00150478	0.00320925	0.000443281	0.000204702	0.0017765	0.0543942	0.000666862	0.00179492	0.00800534	0.00102676	0.002934	0.000988439	0.0342353	0.000306692	0.00299717	0.00209591	0.00458502	0.00076539
DGRP_41	0.0146181	0.00159075	0.000340979	0.0271722	0.00243316	0.000381984	0.00979376	0.25435	0.00243875	0.0170055	0.228031	0.000679562	0.00218225	0.010902	0.00306853	0.00266636	0.0133056	0.0233046	0.0100576	0.0272991	0.0927289	0.00210709	0.0438112	0.00127	0.0020449	0.000350213	0.000216206	0.00417365	0.0658159	0.000706314	0.00247835	0.0252628	0.00161286	0.00425709	0.00242144	0.0731376	0.000560331	0.00870054	0.0030061	0.0125486	0.000845576
DGRP_42	0.0140963	0.00399163	0.00126378	0.015758	0.0071316	0.000942444	0.0146963	0.473554	0.00139538	0.0179507	0.151525	0.00171567	0.00123697	0.00766332	0.00306463	0.00315357	0.00502124	0.0569072	0.0043736	0.0204859	0.0437204	0.000712314	0.0206107	0.00213778	0.000804493	3.904e-05	9.65527e-05	0.000948389	0.0781709	0.000241072	0.000702019	0.00492293	0.00100576	0.000716045	0.00040453	0.0304907	0.000319717	0.00122208	0.000155737	0.00586964	0.000552676
DGRP_45	0.0132017	0.0047425	0.00214305	0.0191387	0.00285322	0.000922418	0.0270903	0.488333	0.00216786	0.0217448	0.10697	0.00156667	0.00368237	0.018643	0.00288468	0.00468312	0.00659806	0.0403354	0.00601732	0.0219814	0.0327403	0.000671658	0.0246386	0.00165317	0.0044216	9.18073e-05	3.78697e-05	0.00260326	0.0564892	0.000386602	0.000774205	0.0129764	0.00118584	0.00392761	0.00140358	0.0425864	0.000235648	0.00411668	0.00362885	0.00881194	0.000631149
DGRP_48	0.0092525	0.00307523	7.70543e-05	0.0167224	0.0006905	0.000694805	0.0270918	0.253754	0.00358986	0.0190162	0.118711	0.00040569	0.00182993	0.0128369	0.00779715	0.00740103	0.00817608	0.00921184	0.00922213	0.0260367	0.212424	0.00557045	0.0300575	0.00181135	0.00108399	0.000871966	0.000448102	0.00311552	0.0850993	0.00113684	0.00378802	0.0188408	0.00194115	0.0030387	0.0018091	0.0707553	0.000569624	0.00466596	0.0019759	0.0139674	0.000826668
DGRP_49	0.0139054	0.00191457	0.000233267	0.0209447	0.00145705	0.000819624	0.0233709	0.292325	0.0029389	0.0141201	0.15805	0.000622861	0.00142362	0.0146801	0.00423525	0.00289269	0.008105	0.0208317	0.00609788	0.036844	0.140608	0.00177825	0.0362649	0.0015866	0.00135701	0.00195257	0.000379604	0.00334524	0.0753912	0.0062912	0.00581843	0.0248856	0.00149067	0.00221584	0.00128487	0.0540458	0.00050551	0.00463313	0.00159482	0.00779785	0.000427034
DGRP_57	0.016739	0.00345832	0.0015938	0.0246325	0.00314136	0.00128617	0.0278912	0.438601	0.0036758	0.0186039	0.134868	0.00148487	0.00229061	0.015665	0.00240256	0.00473282	0.007834	0.0563189	0.00286029	0.0177818	0.0363208	0.000833077	0.0229202	0.00164508	0.0029616	0.000133521	0	0.00217473	0.0676703	0.000288206	0.000636704	0.00992332	0.00110466	0.00319988	0.00116588	0.0433287	0.000454655	0.00382426	0.00259046	0.0117291	0.00100718
DGRP_59	0.0149795	0.00140094	0.000273544	0.0332248	0.00125565	0.000184234	0.00847259	0.228786	0.00252	0.0151346	0.225569	0.000454455	0.00189245	0.0129073	0.00303943	0.00469587	0.0147039	0.0142065	0.0035464	0.0239862	0.11199	0.00279045	0.049217	0.00111294	0.0036041	0.000580322	0.000254806	0.00617049	0.0558741	0.00100292	0.00444298	0.0374975	0.00149662	0.00770143	0.00334012	0.0638457	0.000335095	0.0120047	0.00932866	0.0145412	0.00117906
DGRP_73	0.0095494	0.00252501	0.000280177	0.0113886	0.00174535	5.13943e-05	0.0150759	0.446753	0	0.0144761	0.0782219	0.000675617	0.000886672	0.0149064	0.0046254	0.00489495	0.00319086	0.0198689	0.00628978	0.0193228	0.173134	0.00409492	0.0105093	0.00202121	0.00203632	0.000569264	0.000162289	0.000601757	0.089059	0.000519474	0.001444	0.00314212	0.00145189	0.00388044	0.000297461	0.0443309	0.00029114	0.000555407	0.00145325	0.00513463	0.000239773
DGRP_75	0.0151828	0.00381898	0.000603103	0.0148323	0.00229804	0.00072694	0.030348	0.368938	0.00309438	0.0189233	0.136882	0.0011798	0.00172514	0.00995429	0.00353941	0.00323435	0.00507165	0.0384748	0.00516043	0.0244189	0.0691549	0.000897645	0.0260218	0.0024947	0.00233667	0.000146379	0.000138964	0.00185597	0.0946651	0.000558472	0.00131601	0.015934	0.0018926	0.00255397	0.00112391	0.0700903	0.000425652	0.00452156	0.00184007	0.0126758	0.000730993
DGRP_83	0.00977497	0.00220681	0.000794255	0.0225032	0.00176973	0.000849012	0.0143668	0.409799	0	0.0188962	0.104887	0.000671089	0.00171327	0.0247522	0.0037337	0.00736672	0.00950075	0.0247916	0.0120408	0.034896	0.113674	0.00178108	0.0248365	0.00111778	0.00219165	0.0013244	0.000257428	0.00361293	0.0534687	0.00174379	0.00401423	0.0145944	0.0010497	0.00307072	0.00177241	0.0452844	0.00180844	0.00366092	0.00196271	0.0117337	0.000664978
DGRP_85	0.0209036	0.00302124	0.000670302	0.0222437	0.00237235	0.000509972	0.0167641	0.329047	0.00318179	0.0238122	0.145752	0.000892884	0.00154551	0.0109195	0.00420943	0.0047186	0.00665186	0.0262244	0.0131651	0.0184269	0.118924	0.00201349	0.0273837	0.00179819	0.00223609	0.0010864	0.000315096	0.0028172	0.0765329	0.00135674	0.00355216	0.0208361	0.00152429	0.00395923	0.00160347	0.0568339	0.000443022	0.00619474	0.00335295	0.0110717	0.000824251
DGRP_88	0.017799	0.00334478	0.00117479	0.023965	0.00195107	0.000602478	0.0148047	0.304011	0.00301653	0.0308579	0.153671	0.000739534	0.00138383	0.0100239	0.00326737	0.00335589	0.0108143	0.0246543	0.00175367	0.0189351	0.0637729	0.00173127	0.0587896	0.001712	0.00175153	0.000713161	0.000711419	0.00750659	0.0650016	0.00115181	0.00235635	0.0526151	0.00180582	0.00433232	0.00403284	0.0673644	0.000291123	0.0155057	0.00322551	0.0137571	0.00141679
DGRP_91	0.032325	0.00408704	0.00135515	0.0349299	0.00518771	0.00130008	0.0325708	0.308446	0.00176851	0.0159354	0.195045	0.00213393	0.00326501	0.012263	0.00276448	0.00385492	0.010662	0.0584689	0.00376998	0.0217584	0.0352623	0.000782239	0.0375848	0.00253946	0.00394759	0.000196014	0.00035919	0.00344201	0.0794986	0.000580485	0.00105371	0.0168253	0.00153705	0.00326404	0.00156554	0.045126	0.0003776	0.00405238	0.00188338	0.00652328	0.000770229
DGRP_93	0.00721596	0.00233932	0.000317805	0.0177891	0.00236883	0.000684673	0.014115	0.262112	0.0026378	0.0267933	0.183234	0.00104551	0.00212589	0.00937427	0.00444987	0.00528069	0.0121419	0.0468022	0.0114804	0.0378298	0.148607	0.00381135	0.0424324	0.00161548	0.00266501	0.000356649	0.000185542	0.0033462	0.0610666	0.000734639	0.00235728	0.0184705	0.00112584	0.00297238	0.00142602	0.043349	0.000315693	0.00473939	0.00148278	0.00764825	0.000512203
DGRP_100	0.00159761	0.00439448	0.000797024	0.00713471	0.00101906	0.00100219	0.0117286	0.3712	0	0.0279364	0.0854876	0.00132701	0.00234121	0.0140316	0.00639971	0.00506445	0.0112436	0.0409445	0.00668081	0.0629959	0.124065	0.00200329	0.0609137	0.00194209	0.00180988	0.00101619	0.000392141	0.00590911	0.062004	0.00304132	0.00349004	0.0262073	0.00108968	0.00188798	0.00146206	0.0301458	0.000736311	0.00347142	0.000565577	0.00351678	0.000593901
DGRP_101	0.0144882	0.00253361	0.000540012	0.0243942	0.000927629	0.000572044	0.0217551	0.344844	0.000986733	0.0185546	0.131861	0.000282864	0.00147656	0.0205383	0.00455344	0.00626079	0.0085495	0.00818436	0.00504032	0.0327907	0.173863	0.00333424	0.0232571	0.000790627	0.001609	0.000962626	0.000376291	0.00312817	0.0341136	0.00126297	0.00494612	0.0211548	0.00109338	0.00404241	0.00260415	0.0477349	0.000483363	0.0103095	0.0050783	0.00933466	0.000998447
DGRP_105	0.000955982	0.00259558	0.000290852	0.00584021	0.00120966	0.000621097	0.0107745	0.271442	0.00183265	0.0334379	0.0964377	0.00107028	0.00183331	0.0103879	0.00648778	0.00612814	0.0134859	0.0432315	0.0042375	0.060283	0.207759	0.0054693	0.064138	0.00160156	0.00166064	0.000584042	0.000333986	0.00515575	0.0639956	0.00189495	0.00287194	0.0206284	0.000997146	0.00178982	0.00140466	0.0332925	0.000379844	0.00376034	0.000661799	0.00765167	0.000898801
DGRP_109	0.0215501	0.00274478	0.000457268	0.0255577	0.0016512	0.000331906	0.0139155	0.416263	0.000844968	0.0206945	0.149703	0.00053422	0.00152498	0.0134181	0.00341763	0.00384066	0.00645459	0.0166026	0.00233972	0.0145048	0.072052	0.00181741	0.022559	0.00134091	0.00202745	0.000257049	0.000189499	0.00229538	0.0502014	0.000458174	0.00218757	0.0201782	0.00170991	0.00551858	0.00194392	0.0683289	0.000276007	0.00976459	0.00556082	0.0138607	0.000741531
DGRP_129	0.0137249	0.00367352	0.000932743	0.0187122	0.00359242	0.000678274	0.0182405	0.35343	0.00278851	0.0235658	0.139823	0.00132645	0.00185467	0.00843307	0.00344124	0.00364542	0.00858548	0.0475095	0.00313785	0.0209027	0.0563804	0.00113733	0.0433072	0.00227438	0.0026026	0.000266898	0.000465959	0.00414464	0.0828811	0.000861166	0.00164412	0.0241987	0.00165508	0.00370007	0.0018724	0.0652373	0.000784576	0.0067729	0.00202169	0.0184649	0.000991209
DGRP_136	0.0023117	0.00207137	0.000289665	0.00927279	0.000840528	0.000483406	0.0137185	0.219783	0.0026261	0.0241613	0.110717	0.000634115	0.00170909	0.0127617	0.00636767	0.00612828	0.00989807	0.0297632	0.00379109	0.0540971	0.272671	0.00358901	0.0408723	0.00133777	0.00154475	0.000765286	0.000563936	0.00345767	0.066181	0.00149866	0.00662251	0.018589	0.00121432	0.00372635	0.00146685	0.050476	0.000673672	0.00395982	0.00130635	0.00712081	0.000590077
DGRP_138	0.0144767	0.00222871	0.000327056	0.0164419	0.00226049	0.000655481	0.0131664	0.361014	0.00191261	0.0135629	0.143367	0.00109134	0.00117008	0.00959379	0.0034425	0.00318135	0.00575774	0.0373118	0.0121802	0.0205796	0.0962666	0.0015336	0.0223815	0.00224491	0.00130576	0.000324457	0.000200038	0.00181676	0.103725	0.000643751	0.00254147	0.0141673	0.00188388	0.00269543	0.00118547	0.0671666	0.000583781	0.00325836	0.00138358	0.0103454	0.000484698
DGRP_142	0.0130387	0.00400417	0.00077074	0.0170018	0.00234732	0.00172154	0.0267044	0.401252	0.000964863	0.0286083	0.137523	0.00178269	0.00228486	0.0115115	0.00374986	0.00352484	0.0068741	0.0479054	0.00546824	0.0280407	0.0590141	0.00141848	0.0293989	0.0023595	0.00308763	0.000153004	0.000153145	0.00207537	0.0715841	0.00068525	0.00158732	0.012918	0.00147882	0.00318404	0.000950441	0.0482933	0.000435802	0.00367353	0.00193863	0.00946196	0.000711891
DGRP_149	0.0138852	0.00258395	0.000335521	0.0129	0.00317552	0.000481039	0.0174954	0.311597	0.0025699	0.0182554	0.179868	0.00145573	0.00116727	0.00484756	0.00383144	0.00163134	0.0062939	0.0515267	0.00166125	0.0212962	0.0949439	0.0021705	0.0394757	0.00260103	0.00170562	0.000156273	0.0002149	0.00227459	0.0972654	0.000515765	0.00219992	0.0188783	0.00189319	0.00243618	0.00121044	0.0605117	0.000580984	0.00445302	0.000940551	0.00803176	0.00052675
DGRP_153	0.0138334	0.00246847	0.00059711	0.0243548	0.00440238	0.00111804	0.0204517	0.296161	0.00297642	0.0215089	0.214209	0.00176676	0.00234833	0.00895914	0.00318559	0.0044434	0.00980558	0.0695264	0.00373811	0.0227748	0.0673021	0.00190743	0.0365881	0.00230903	0.00279635	0.000115536	9.38503e-05	0.00227715	0.0817898	0.00038923	0.000936962	0.0125376	0.00128062	0.00352867	0.000903379	0.0433347	0.000313277	0.00239783	0.00105533	0.00879747	0.000550188
DGRP_158	0.0157523	0.00147561	8.0195e-05	0.0242249	0.00228303	0.000276438	0.0138601	0.278974	0.00306794	0.0155528	0.125825	0.000601504	0.00102469	0.0173545	0.00519508	0.00612654	0.00789783	0.0185208	0.0105153	0.0258814	0.219526	0.00624066	0.0226175	0.00196873	0.00116778	0.0013466	0.000374565	0.00239527	0.0868524	0.00134163	0.00454682	0.014333	0.00118693	0.00232162	0.00128461	0.0435825	0.000365631	0.00446372	0.00118493	0.00761844	0.000544436
DGRP_161	0.0169371	0.00261036	0.000318878	0.0241899	0.0014222	0.000424896	0.0169952	0.362261	0.00312177	0.0179998	0.0962181	0.000419032	0.00108971	0.0203154	0.0052134	0.00708134	0.00568792	0.00852087	0.0138486	0.0176601	0.158009	0.00478081	0.011999	0.00202028	0.00088205	0.00100409	0.000337925	0.00160256	0.0626496	0.00100878	0.00414138	0.0110321	0.00228587	0.00425135	0.00186659	0.0806594	0.00112107	0.00734978	0.00210389	0.0173891	0.000741279
DGRP_176	0.00949132	0.00214521	0.000289456	0.0131812	0.00248874	0.000679542	0.0149622	0.34786	0.00211086	0.0258645	0.131667	0.00071861	0.00136639	0.0107449	0.00467593	0.00491024	0.00550175	0.0298662	0.00551359	0.0329212	0.168242	0.00414145	0.0240462	0.0016192	0.002075	0.000469053	0.000332626	0.0014781	0.064986	0.00106194	0.00433056	0.0111732	0.00119112	0.00382863	0.000809909	0.0456873	0.000914659	0.00401026	0.00136365	0.0101157	0.000832634
DGRP_177	0.0100949	0.00260843	0.00107562	0.0274705	0.00278004	0.000846875	0.0140123	0.360837	0.00260555	0.0115369	0.169762	0.00139935	0.00284198	0.01949	0.00320552	0.00446746	0.0125782	0.0433206	0.00344848	0.0290599	0.0448455	0.00109259	0.0421281	0.00196175	0.00334398	0.000241197	0.000549169	0.004763	0.0693409	0.000522482	0.000986513	0.022558	0.00174377	0.00407374	0.00198579	0.054123	0.000491642	0.00575788	0.00303615	0.0112768	0.000830308
DGRP_181	0.0217894	0.00297456	0.00111413	0.0266325	0.00282909	0.000489939	0.0206237	0.426918	0.00304211	0.0164945	0.164386	0.000629994	0.00215558	0.0141409	0.00224499	0.00264676	0.00831674	0.0228523	0.00595414	0.0151619	0.0289193	0.000663693	0.0304144	0.00133671	0.00222312	0.000151753	0.000216141	0.00265607	0.0629291	0.000282335	0.000721858	0.0172176	0.00149222	0.0043429	0.00152043	0.0610759	0.000201901	0.00604018	0.00343046	0.0116128	0.00082113
DGRP_189	0.00411796	0.00120061	0	0.0114962	0.00044175	8.16923e-05	0.00642484	0.152568	0.00207603	0.011619	0.0915787	0.000408871	0.000843189	0.0106766	0.00780671	0.00491622	0.0076269	0.00963777	0.0106052	0.0369812	0.348733	0.00487618	0.026806	0.00258259	0.000844964	0.00128182	0.00060673	0.00351371	0.105171	0.00159739	0.00541122	0.0244731	0.00255765	0.00207265	0.00161171	0.0776814	0.00101511	0.00489666	0.00103243	0.0114508	0.000457047
DGRP_195	0.017381	0.00188579	0.000435477	0.0145878	0.00256054	0.000491419	0.0110585	0.402509	0	0.0228102	0.154783	0.000843107	0.00117346	0.0108219	0.00362434	0.00359991	0.00500897	0.0340159	0.00794545	0.0351393	0.124593	0.00118157	0.0270122	0.00125136	0.00132103	0.000236414	0.000189357	0.00135834	0.0564159	0.000758884	0.00233884	0.00980627	0.00082207	0.00161793	0.000605845	0.0291467	0.00103457	0.00199573	0.000622161	0.00605124	0.000469662
DGRP_208	0.0187007	0.00285435	0.000649955	0.0279328	0.00156697	0.000719935	0.0225912	0.392101	0.000950277	0.0219312	0.13098	0.000754808	0.00212336	0.0208377	0.00315164	0.00328081	0.00776736	0.0211306	0.0026832	0.022868	0.0614231	0.00156601	0.021799	0.00113613	0.00279421	0.000360302	0.000201867	0.00272907	0.0495729	0.000637009	0.00262731	0.0187367	0.00172643	0.00443429	0.00254013	0.0750819	0.000498267	0.0133689	0.00847721	0.0229021	0.00135054
DGRP_217	0.00320472	0.00280576	0.000900975	0.00996678	0.00143122	0.000356205	0.00915098	0.466951	0	0.0202473	0.0985176	0.000981253	0.00125182	0.0167869	0.0032482	0.00354963	0.00997833	0.0299513	0.00388928	0.0524108	0.0595578	0.00114238	0.04775	0.00134123	0.00132068	0.000210785	0.000145005	0.00496603	0.0517552	0.000603312	0.00112573	0.0267488	0.00131253	0.00140824	0.00206521	0.0454147	0.000609393	0.00679284	0.000891613	0.00824151	0.000818944
DGRP_223	0.00888763	0.00317408	0.000607572	0.0103367	0.00178695	0.000641065	0.0254199	0.513423	0	0.0262961	0.100174	0.000841208	0.00102453	0.0128885	0.00403509	0.0045729	0.00330177	0.0274929	0.00342385	0.0285013	0.0945609	0.00192797	0.0149423	0.00138759	0.000873153	0.000206256	0.000152213	0.000782994	0.0559164	0.0004044	0.00134087	0.00597231	0.00115547	0.0012194	0.000315741	0.0365291	0.000355377	0.00117139	0.000474224	0.00314677	0.000232085
DGRP_227	0.0136093	0.00273966	0.000409262	0.0213394	0.00320777	0.000185955	0.0247936	0.418997	0.0010407	0.0261627	0.137329	0.000879377	0.00197837	0.0166044	0.0038521	0.00407409	0.0064762	0.0370332	0.00153646	0.0226366	0.105863	0.00249441	0.019134	0.00136685	0.00267373	0.00034494	0.000150139	0.00139424	0.0629333	0.000450359	0.00163542	0.00773612	0.000993949	0.00314003	0.000589887	0.0355482	0.000300696	0.00183427	0.00197913	0.00400769	0.000326202
DGRP_228	0.0255317	0.00339576	0.000318306	0.0264197	0.00139083	0.0002774	0.0183042	0.385937	0.00284074	0.024307	0.132296	0.000420939	0.00117419	0.0141091	0.00482375	0.00577505	0.00594155	0.0113762	0.00251316	0.0137712	0.133337	0.00452779	0.0149763	0.00157821	0.00114828	0.000486035	0.000492883	0.00128988	0.0659959	0.000574659	0.00248041	0.0105419	0.00153091	0.00447774	0.0011503	0.0558431	0.00065197	0.00435535	0.00304047	0.00957847	0.000629229
DGRP_229	0.0209902	0.00423668	0.000972725	0.0256433	0.00259951	0.000752459	0.0215033	0.449357	0.00105629	0.0238223	0.126943	0.00122967	0.00134318	0.0161296	0.00396275	0.00529645	0.00668658	0.0319123	0.0030701	0.016707	0.0709089	0.0015021	0.0193196	0.00189204	0.000998484	0.000358693	0.000186478	0.00183411	0.0637462	0.000433209	0.00188765	0.00949381	0.00161105	0.00118629	0.000842452	0.0487861	0.000366431	0.00266282	0.0007658	0.0062967	0.00053491
DGRP_233	0.0124691	0.00158775	0	0.0142241	0.00231819	0.00010104	0.013372	0.212224	0.00221422	0.0161921	0.164898	0.000405134	0.000957943	0.00668661	0.00536414	0.00357381	0.00575745	0.0188235	0.00429836	0.024942	0.239293	0.00870055	0.028553	0.00200891	0.00133841	0.000633382	0.000361483	0.00165965	0.113297	0.00113462	0.00422427	0.0137289	0.00140731	0.00271591	0.000889384	0.0548942	0.000607532	0.00358596	0.00122385	0.00818566	0.000813839
DGRP_235	0.000657237	0.0022438	0.000241824	0.00313939	0.000966263	0.00059975	0.00511587	0.254962	0.00196518	0.0190514	0.0684577	0.000438908	0.00147942	0.00892451	0.00527962	0.00417064	0.00920939	0.0176161	0.00500358	0.0720714	0.160494	0.00276027	0.0879694	0.00120522	0.000918289	0.000401354	0.000401207	0.00978797	0.0631112	0.00186667	0.00426667	0.0689544	0.00178018	0.00177823	0.00419133	0.072504	0.000574908	0.0195926	0.00145504	0.012452	0.00162711
DGRP_237	0.00754754	0.00266248	0.000199871	0.015813	0.00104381	0.000334367	0.0208989	0.282549	0.00285875	0.0216431	0.0886812	0.000328212	0.00181238	0.0212987	0.00702513	0.0101611	0.00650683	0.00806593	0.0125985	0.0339368	0.256046	0.00936804	0.0167929	0.00127966	0.00149836	0.00167859	0.00047811	0.00173886	0.0663334	0.00140591	0.0066571	0.0102773	0.00126896	0.0035554	0.0011095	0.0543358	0.000475013	0.00496112	0.00339113	0.0101059	0.00089471
DGRP_239	0.0104291	0.00319069	0.000722274	0.015685	0.00164283	0.000691243	0.028134	0.489019	0	0.0254749	0.113943	0.000883225	0.00156282	0.0174826	0.00356688	0.0045614	0.00600791	0.0318711	0.00200655	0.0280652	0.0820663	0.00176703	0.0214903	0.00135365	0.00212102	0.000233129	0.000148676	0.00151861	0.0560995	0.0004062	0.00104616	0.00784493	0.000894737	0.00227988	0.000530205	0.0285386	0.000337852	0.00129379	0.00111445	0.00349996	0.000256371
DGRP_256	0.0241801	0.00346322	0.00133381	0.0320828	0.00484819	0.0013756	0.0248495	0.424521	0.0020729	0.0194715	0.131574	0.00104921	0.00341719	0.0177278	0.00262997	0.00382808	0.00807349	0.0382519	0.00379977	0.0187248	0.0350171	0.000596409	0.0255522	0.00169181	0.00328162	0.000268805	8.0923e-05	0.00345482	0.0644745	0.000387611	0.000815395	0.0168055	0.00135465	0.00420454	0.00191203	0.0499386	0.000495203	0.00574586	0.00335325	0.0121641	0.00086418
DGRP_280	0.0098497	0.00187828	0.000437139	0.0169983	0.00153296	0.000369943	0.01455	0.412883	0	0.0337618	0.165044	0.000659959	0.00087781	0.0133813	0.00324065	0.00395062	0.00762864	0.0314611	0.00393773	0.0333599	0.0982112	0.00257635	0.0305384	0.00100713	0.00078158	0.000302396	0.000397211	0.00189949	0.0461756	0.000517654	0.00149629	0.0115883	0.000756369	0.00134145	0.000762833	0.0317175	0.00119285	0.00286722	0.000556485	0.00853912	0.000719484
DGRP_287	0.0165836	0.00179212	0.00027102	0.0324314	0.00177873	5.5946e-05	0.00981635	0.27719	0.00302306	0.0196172	0.123277	0.0004515	0.00142805	0.0158134	0.00410305	0.00996779	0.0088112	0.0109023	0.00567493	0.0115265	0.140778	0.00416314	0.0195413	0.00174801	0.00234972	0.000888942	0.000269903	0.00328578	0.0917432	0.000568456	0.00315883	0.0197192	0.002316	0.00855226	0.00271583	0.100582	0.000486989	0.00899288	0.0096512	0.0223002	0.0011489
DGRP_301	0.0105763	0.00157594	0.000289097	0.025853	0.000792927	0.000331518	0.0107441	0.268973	0.00278873	0.0295267	0.174013	0.000447841	0.00146794	0.0172275	0.00491753	0.00566104	0.0120249	0.0099338	0.0111958	0.0401205	0.181372	0.00290207	0.0400739	0.000719235	0.00148914	0.000678537	0.000398059	0.00460751	0.0329196	0.00133662	0.00565617	0.0279114	0.00101938	0.00252596	0.00251901	0.0425587	0.000662199	0.00873052	0.00267207	0.00952799	0.000753007
DGRP_303	0.0660416	0.00166805	0.000729599	0.0602035	0.00428857	0.000244435	0.0107634	0.249494	0.00205881	0.0127924	0.332679	0.00229598	0.00294912	0.00863616	0.00132476	0.00164376	0.0127566	0.0740608	0.00147201	0.00788434	0.0119493	0.000359531	0.0407836	0.00190076	0.00534915	0	0	0.00183298	0.0521745	0.000151535	0.00032297	0.00736813	0.000559498	0.00293157	0.000565552	0.014193	0.000159544	0.00119383	0.000891352	0.00287167	0.000357692
DGRP_304	0.00106579	0.00104079	0	0.0075189	0.000719169	8.90563e-05	0.00482001	0.181059	0.00192858	0.016032	0.1281	0.000506438	0.000943752	0.00855369	0.00592434	0.00498443	0.0119734	0.0282296	0.00453285	0.059887	0.282132	0.00338335	0.0544825	0.00158173	0.00118601	0.000546282	0.000470994	0.0039287	0.0791546	0.00115562	0.00350702	0.025131	0.00127803	0.00308798	0.00142592	0.0497203	0.000752421	0.00588517	0.00114346	0.0108663	0.000937076
DGRP_306	0.00510004	0.00198865	0.000705104	0.0170247	0.00163917	0.000483154	0.0104615	0.377026	0.00109995	0.0206755	0.139894	0.000450873	0.00147163	0.0179124	0.00392522	0.0061147	0.0108792	0.0193138	0.00919868	0.0447996	0.125887	0.00226819	0.0317243	0.00100031	0.00136607	0.0004887	0.00024878	0.00300545	0.0551365	0.000795044	0.00235434	0.0146377	0.00118858	0.00231091	0.00141104	0.0494662	0.000579515	0.00459406	0.00159527	0.00887087	0.00057766
DGRP_307	0.0165343	0.00283407	0.000530345	0.0126379	0.00277571	0.000452547	0.0164967	0.474883	0	0.0171945	0.150578	0.00119892	0.000921611	0.00867536	0.00294372	0.00236662	0.00366769	0.0438991	0.00259883	0.0207188	0.0641922	0.000657582	0.0210796	0.0015154	0.000931996	0.000107076	6.39218e-05	0.000808927	0.0672092	0.000204716	0.000805333	0.0065004	0.00123438	0.00140852	0.000402101	0.041683	0.000564684	0.00152066	0.000560796	0.00609783	0.000371197
DGRP_309	0.0174935	0.00463691	0.00153024	0.0219454	0.00199484	0.000516365	0.0162809	0.425374	0.00254891	0.0283313	0.146201	0.00106967	0.00216782	0.0111026	0.00322992	0.00448905	0.00899695	0.0323571	0.0018772	0.0167357	0.0380408	0.000838586	0.0403329	0.00154188	0.00241394	0.000188083	8.12938e-05	0.00398167	0.058799	0.00040301	0.000864139	0.0232183	0.00155677	0.00353016	0.00186254	0.0511941	0.000461661	0.00612127	0.0030212	0.011524	0.000742739
DGRP_310	0.0139426	0.00224235	0.000642267	0.0247829	0.00210733	0.000655131	0.0190539	0.310432	0.00235856	0.019668	0.186441	0.00090628	0.00154072	0.0112707	0.00256689	0.00324765	0.0115633	0.0322645	0.00228028	0.0202496	0.0430147	0.00129375	0.0522808	0.00177873	0.00156463	0.000110792	0.000110317	0.00531462	0.0780955	0.000211762	0.000873018	0.0320258	0.00200131	0.003372	0.00238947	0.0758844	0.000190048	0.00929616	0.00228354	0.0183614	0.00112872
DGRP_313	0.00129022	0.000439819	0	0.00884902	0.000436693	0	0.00315068	0.0566717	0.00116826	0.0122645	0.08486	0.000179753	0.00082878	0.0103844	0.00813098	0.00800602	0.0147336	0.00383372	0.00317845	0.0438914	0.424013	0.00926692	0.0590718	0.00102785	0.00115479	0.00334424	0.00108881	0.0132235	0.0434748	0.00280567	0.00944638	0.0680026	0.00141083	0.00344278	0.00720911	0.0555236	0.000471628	0.0184986	0.00334041	0.010458	0.00103047
DGRP_315	0.00275314	0.00092003	0	0.0108927	0.000887098	0	0.00617465	0.120962	0.00143699	0.0152395	0.112294	0.000590374	0.000844642	0.00911773	0.00891235	0.00524901	0.0118573	0.0163881	0.00312838	0.0382498	0.364878	0.00785415	0.0527374	0.0033637	0.00110152	0.00127428	0.000537741	0.00489253	0.109442	0.00109139	0.00291183	0.0217053	0.00166297	0.00205398	0.00109148	0.0444316	0.000420238	0.00324997	0.000576482	0.00801298	0.000594956
DGRP_318	0.014771	0.00171823	8.09993e-05	0.0336883	0.0017341	0.000188082	0.0176396	0.232247	0.00252873	0.0213303	0.157241	0.00105583	0.00180814	0.0183032	0.00514416	0.00800768	0.0126351	0.0419966	0.00513855	0.0214651	0.211249	0.00645196	0.024308	0.00297839	0.0081889	0.00097086	0.000242773	0.00143244	0.112854	0.000535026	0.00138074	0.00288989	0.000505254	0.00636938	0.000423031	0.0148174	0.000476742	0.000454046	0.000556177	0.00357753	0.000382647
DGRP_320	0.0177901	0.00253649	0.00072311	0.0219591	0.00145368	0.000574022	0.0247099	0.475002	0	0.0138515	0.151357	0.000752966	0.00136282	0.0160026	0.00280706	0.00362388	0.00768013	0.0257327	0.0021336	0.0265954	0.0551811	0.000881206	0.0290251	0.00111059	0.00158906	0.000273186	0.000112401	0.00232249	0.048549	0.000443723	0.00105977	0.0133517	0.000873044	0.00248757	0.000857107	0.0325122	0.000593223	0.00316135	0.00137554	0.00675865	0.000599748
DGRP_321	0.00316959	0.000648354	0	0.0113913	0.00112492	0	0.0093526	0.08767	0.00139377	0.0176992	0.0933069	0.000264594	0.00101778	0.0108299	0.00621922	0.0041166	0.00719603	0.0085876	0.00425894	0.0338304	0.38479	0.00955623	0.0236208	0.00152939	0.00100071	0.00200752	0.000748104	0.00327819	0.0851765	0.00184794	0.0110359	0.0247863	0.00215411	0.00297322	0.00290534	0.100205	0.000637136	0.012209	0.00338982	0.0223407	0.00132347
DGRP_324	0.0128672	0.00411986	0.000889273	0.0193219	0.00225855	0.000640723	0.0212479	0.385286	0.00226673	0.023779	0.153359	0.00154707	0.00216292	0.0116542	0.00469683	0.0064737	0.00791661	0.0441499	0.00260176	0.0240694	0.0857969	0.00186645	0.0288985	0.00210672	0.00318046	0.000254662	0.000189706	0.00165765	0.0748402	0.000591513	0.00178184	0.00990993	0.00137341	0.00356876	0.000813622	0.0379437	0.000289132	0.00305944	0.00175616	0.00751556	0.000911214
DGRP_332	0.00823364	0.00125263	0	0.0117316	0.00125765	0.000217652	0.0147571	0.193714	0.00243093	0.0126921	0.111806	0.00027904	0.00109443	0.0106069	0.00531077	0.00524466	0.00664903	0.00951667	0.00449066	0.0298526	0.220193	0.0063599	0.0287168	0.00183136	0.000965989	0.00126287	0.000502756	0.00361539	0.10292	0.00173871	0.00644049	0.02989	0.00268575	0.00236335	0.00319123	0.117629	0.000476696	0.0117597	0.00201573	0.0230331	0.00100742
DGRP_335	0.0220914	0.00328606	0.00147234	0.0244379	0.00282203	0.000136481	0.00999306	0.54402	0	0.018841	0.112042	0.00128764	0.00189664	0.0171463	0.00254908	0.00360975	0.00521313	0.0307893	0.0152872	0.0150701	0.0304747	0.000550991	0.0152289	0.00128093	0.00220118	0.000127555	8.74978e-05	0.00129505	0.0453072	0.000308795	0.000961658	0.00740904	0.00119165	0.00245521	0.00085979	0.0400182	0.00115457	0.00287093	0.00224613	0.0109608	0.000513301
DGRP_336	0.00615427	0.004103	0.000638388	0.0122204	0.002237	0.000310581	0.0180718	0.4505	0.00112358	0.0198627	0.0817	0.00108047	0.00164138	0.0170462	0.00643651	0.00526029	0.00489272	0.0190983	0.00977789	0.0298097	0.136187	0.00231886	0.0142757	0.00208532	0.00118145	0.000472809	0.00031286	0.00131246	0.0681009	0.000451534	0.0020882	0.00699931	0.00187222	0.00210094	0.000949668	0.0531932	0.000240018	0.00229461	0.00122076	0.0096982	0.000473569
DGRP_367	0.00345013	0.00206815	0.000242876	0.0114315	0.000633417	0.000179236	0.0123336	0.166912	0.00277051	0.0884034	0.0655462	0.000248521	0.00181339	0.0148393	0.007485	0.011469	0.00697837	0.00474233	0.00842227	0.0350621	0.234806	0.0259402	0.029417	0.00121487	0.00151683	0.00198719	0.00079486	0.00723773	0.0585262	0.011481	0.00787784	0.0410512	0.00181376	0.00268945	0.0057883	0.0787917	0.000485549	0.0178427	0.00356812	0.0192147	0.00136456
DGRP_370	0.0133378	0.00204024	0.000334491	0.0361469	0.00133194	0.000253418	0.0137441	0.315569	0.00293703	0.0221842	0.162959	0.000449876	0.00185247	0.0201757	0.00433296	0.00819663	0.0131179	0.0159935	0.00304464	0.0258199	0.138406	0.00237545	0.0330699	0.00111954	0.00299152	0.00071784	0.000260109	0.00516997	0.0529733	0.000591503	0.00291042	0.0245634	0.0010876	0.00577041	0.00289641	0.042804	0.00044778	0.00617627	0.00468721	0.00644286	0.000379336
DGRP_371	0.00458895	0.00172507	3.17916e-05	0.021663	0.000961969	6.97152e-05	0.0174028	0.184135	0.00230535	0.0165546	0.119768	0.000363522	0.00152561	0.01795	0.0073769	0.00720538	0.0128171	0.00912883	0.00208731	0.0373792	0.262545	0.00785586	0.033249	0.00196598	0.00147311	0.00212021	0.000323745	0.00506004	0.0816868	0.0018468	0.00507963	0.026687	0.00205003	0.00407689	0.00258601	0.0698633	0.000558626	0.0081425	0.00350608	0.0126523	0.00108871
DGRP_373	0.0152561	0.00353566	0.000683834	0.0174404	0.00154814	0.000161186	0.0137378	0.511129	0	0.0178305	0.124372	0.000957315	0.00116878	0.011536	0.00381868	0.00446084	0.00472983	0.0228378	0.00517976	0.0165975	0.0658519	0.000721676	0.0189444	0.00156207	0.00144861	0.000138492	0.000119029	0.00143699	0.056216	0.000183924	0.000795606	0.0115322	0.00143017	0.0021828	0.000776138	0.0460117	0.000236791	0.00360484	0.00198713	0.00721676	0.000431014
DGRP_374	0.0171033	0.00298037	0.001151	0.0171289	0.00250683	0.000489329	0.0181562	0.436555	0.00350963	0.0244129	0.144547	0.000692389	0.00139982	0.0128654	0.00265498	0.00343721	0.00662716	0.0288411	0.00447217	0.0213031	0.0514631	0.0011312	0.0295281	0.00156019	0.00146526	0.000403281	0.000142591	0.00206649	0.0805658	0.000678274	0.00125572	0.0132727	0.00128787	0.00235612	0.000988209	0.0485858	0.000502628	0.00304258	0.00119393	0.00677382	0.000598396
DGRP_375	0.0257991	0.00178962	0	0.0246076	0.00134106	0.000327218	0.0344409	0.213846	0.00239562	0.0161414	0.225771	0.000314958	0.00195259	0.0137881	0.00404398	0.00366391	0.00623683	0.00732686	0.0215134	0.0304942	0.138621	0.00402411	0.0286595	0.00103435	0.00101184	0.00114956	0.000288215	0.00213467	0.0584359	0.000973292	0.00354191	0.025258	0.00150558	0.00261623	0.00166061	0.0661293	0.000568282	0.00966084	0.00269473	0.0132573	0.000652638
DGRP_377	0.00397727	0.00179357	0	0.0117919	0.000976568	0	0.0123871	0.188338	0.00217497	0.0216569	0.102055	0.000316873	0.00131495	0.0112334	0.00971762	0.00520628	0.00763362	0.00863893	0.00505006	0.0401008	0.339352	0.010775	0.0330742	0.00167846	0.00113912	0.00123764	0.000768231	0.00377951	0.0656716	0.00151372	0.00629794	0.0247246	0.00148984	0.00202151	0.00181458	0.0523538	0.000522116	0.00614359	0.00128979	0.00907558	0.000506472
DGRP_379	0.0322421	0.00566334	0.00158298	0.0153345	0.00159611	0.000932625	0.0590979	0.560683	0	0.0230731	0.115929	0.000672532	0.00175702	0.0109767	0.00235176	0.00280434	0.00309546	0.0208591	0.00077581	0.0108061	0.025906	0.000736076	0.0143927	0.000977223	0.00189753	9.7409e-05	0	0.00077836	0.0374097	0.000147371	0.000401642	0.0063571	0.000811993	0.00234119	0.000559858	0.0274763	0.000306883	0.00190056	0.0018114	0.00498441	0.000329315
DGRP_380	0.0054251	0.00223527	0.000298178	0.0125721	0.00224094	0.000522379	0.0249193	0.306255	0.00284749	0.0210457	0.110487	0.000918159	0.00232425	0.0156013	0.00574166	0.00636916	0.00765843	0.0433791	0.00398283	0.0511004	0.221678	0.00242681	0.0271999	0.00144477	0.00271635	0.000525733	0.000363233	0.00187069	0.0580445	0.00080007	0.00359028	0.00878421	0.000783717	0.00348967	0.000907823	0.0284847	0.000400231	0.00217119	0.00101583	0.00671524	0.000543047
DGRP_381	0.00294452	0.0029697	0.000439901	0.00926773	0.00159495	0.000501387	0.0129169	0.370043	0.00329394	0.0190477	0.104899	0.00121922	0.00206843	0.0125704	0.00439823	0.00415737	0.0119092	0.0417056	0.00416225	0.0463429	0.109888	0.00164919	0.0586419	0.00191816	0.00307604	0.000169682	0.000364586	0.00553625	0.0761307	0.000453751	0.00127559	0.025017	0.00124422	0.00339144	0.00166775	0.0400118	7.55757e-05	0.00417283	0.00199412	0.00631327	0.000556141
DGRP_382	0.00795405	0.0027424	0.000378447	0.0107845	0.00169261	0.000723224	0.0357316	0.438029	0	0.0153401	0.121514	0.000755213	0.00138296	0.0134106	0.00328212	0.00246143	0.00630936	0.0356678	0.00284627	0.0441871	0.0801242	0.00127115	0.0320863	0.00131625	0.000895838	0.000219435	0.000143861	0.00214572	0.0677875	0.000441921	0.00124776	0.0133776	0.00101579	0.00112632	0.000901778	0.0390572	0.000327214	0.00326916	0.000542455	0.0066883	0.000768794
DGRP_383	0.00830733	0.0010753	0	0.0119848	0.000594744	9.54667e-05	0.0153645	0.157681	0.00191618	0.01729	0.148684	0.000242537	0.00109446	0.00917094	0.00636547	0.00421697	0.00689842	0.00678256	0.0169492	0.0371591	0.341967	0.0090302	0.0324857	0.00106108	0.00144674	0.0011689	0.000562001	0.00206103	0.0629283	0.00165946	0.00709676	0.0183987	0.00105477	0.00359549	0.00133136	0.0443477	0.00044214	0.00600686	0.00272898	0.007365	0.00111683
DGRP_385	0.0136892	0.00332353	0.000232384	0.0172602	0.000895917	0.000273982	0.0341944	0.346421	0.0032319	0.0205543	0.109078	0.000530946	0.00182245	0.0187573	0.00524118	0.00569405	0.00708433	0.0128143	0.00896366	0.0274557	0.151369	0.00421248	0.0230434	0.0017536	0.00239754	0.000771468	0.000239491	0.00258708	0.0808303	0.000767058	0.00239148	0.0147833	0.00124931	0.00556032	0.00186294	0.04808	0.000519042	0.00520939	0.0038161	0.00994437	0.000991724
DGRP_386	0.00109392	0.000535686	0	0.005588	0.00110556	0	0.00745347	0.0705426	0.00127349	0.0106962	0.0765776	0.000307148	0.00125538	0.00891994	0.00913958	0.00528916	0.00834306	0.0102787	0.00285803	0.0598841	0.439258	0.0119042	0.0435424	0.00196267	0.00139168	0.00211298	0.00118887	0.00528188	0.0835542	0.00264605	0.00865867	0.0310878	0.00174707	0.00249785	0.00255788	0.0623062	0.000538983	0.00692353	0.00172054	0.00722638	0.000482924
DGRP_391	0.0173286	0.00287126	0.000795167	0.0136441	0.00249283	0.000153996	0.0142843	0.482398	0.00301419	0.0154485	0.131737	0.00133702	0.000979715	0.00969002	0.00285344	0.00298889	0.004259	0.0512614	0.00637703	0.0174866	0.0494496	0.000723462	0.0195245	0.00186569	0.000987152	0.000106869	0	0.00119189	0.0763958	0.000218469	0.000930891	0.00909459	0.00129218	0.00106253	0.00087122	0.0451935	0.00067531	0.00214989	0.000496043	0.00578134	0.000588302
DGRP_392	0.0172474	0.00335686	0.000393188	0.0204351	0.0016954	0.000615817	0.0338798	0.364057	0.00312591	0.0215375	0.141036	0.000801789	0.00153441	0.0135223	0.00465319	0.00449531	0.00682869	0.0256101	0.00304986	0.0234146	0.126911	0.00358183	0.0222833	0.00184644	0.00169176	0.000476538	0.000269146	0.00162213	0.0750123	0.000646232	0.0038537	0.0100536	0.00131756	0.00225888	0.000810336	0.04479	0.000360841	0.00260619	0.00157619	0.00622774	0.00043523
DGRP_399	0.0106396	0.00216981	0.000164609	0.0178824	0.000856881	0.000156911	0.0211642	0.245984	0.00290316	0.0258121	0.164478	0.00029474	0.00168877	0.0115388	0.00462589	0.0050438	0.00856643	0.011076	0.00338194	0.0316968	0.173167	0.00713359	0.0340951	0.00102322	0.00243223	0.000849877	0.000499658	0.00319677	0.0535553	0.00150127	0.0111003	0.026791	0.00143216	0.00628656	0.00276355	0.0684679	0.000727621	0.0118265	0.00822622	0.0133567	0.00117004
DGRP_405	0.00871249	0.00216577	0.000173848	0.0194472	0.00103341	0.000546506	0.0226712	0.247305	0.00276168	0.0195963	0.125101	0.000333178	0.00178453	0.0132474	0.00620822	0.00609734	0.00877295	0.0097479	0.00836324	0.0371202	0.223414	0.00489889	0.0276963	0.00100338	0.00116588	0.00261247	0.00084985	0.00423824	0.0487589	0.00402907	0.0162899	0.0260443	0.0012817	0.00247412	0.00305943	0.0587784	0.00124518	0.0107069	0.00284168	0.016077	0.000931097
DGRP_406	0.0028347	0.00103585	0	0.0106231	0.000432462	0.000128079	0.02214	0.139887	0.00158473	0.0126366	0.0961312	0.000185378	0.00206869	0.0199759	0.00780129	0.00453773	0.0122574	0.00592455	0.00705911	0.0822119	0.36075	0.00806063	0.0517402	0.00104485	0.00183992	0.00275265	0.000797086	0.00659774	0.0458126	0.003249	0.00685846	0.0329194	0.000800228	0.0024896	0.00239157	0.0309029	0.000400936	0.00607643	0.00138938	0.0030407	0.000302673
DGRP_409	0.016422	0.00409431	0.000754108	0.0175687	0.00190563	0.000784605	0.0332515	0.462955	0.00309757	0.0306106	0.123988	0.000865303	0.00172615	0.0177715	0.00398697	0.00427705	0.00570712	0.0340828	0.00417829	0.0245193	0.0774911	0.00192577	0.0181358	0.00134561	0.00172689	0.000289164	0.000141401	0.00121766	0.056828	0.000409399	0.00176797	0.00655267	0.000841787	0.00184646	0.000561189	0.0295314	0.000255021	0.00156758	0.00106648	0.00354568	0.000281367
DGRP_426	0.0174972	0.00416953	0.000650028	0.0233341	0.00136473	0.00122978	0.0313941	0.427546	0	0.0278346	0.128436	0.000313366	0.00231885	0.0187717	0.00484179	0.00672674	0.00562453	0.00734249	0.00775436	0.023115	0.121515	0.00322795	0.0174603	0.000764846	0.00175407	0.000508027	0.000268148	0.00173613	0.0337025	0.000693432	0.00386238	0.0121601	0.0008905	0.00443772	0.00104456	0.0375993	0.000368756	0.00404221	0.00498972	0.00814549	0.000462674
DGRP_427	0.0228024	0.00293558	0.000720027	0.0328939	0.00121935	0.000600347	0.0226495	0.363289	0.00257387	0.0170208	0.193682	0.000547385	0.00198108	0.0158809	0.00321727	0.00438077	0.0114051	0.0204596	0.00254741	0.0208947	0.0641261	0.00129716	0.034954	0.00105875	0.00249622	0.000313148	0.000145253	0.00365177	0.0524082	0.000476007	0.00173189	0.0206024	0.00119914	0.0037613	0.00176122	0.0485531	0.000295189	0.00586361	0.0037167	0.00892955	0.000669407
DGRP_437	0.0161056	0.0038201	0.000887647	0.0190665	0.00145375	0.000772261	0.0195042	0.494888	0	0.0210595	0.121802	0.000806185	0.00175096	0.0158448	0.00374587	0.00404676	0.00587757	0.0253909	0.00507786	0.0229734	0.0709469	0.00122623	0.0197941	0.00113331	0.00221894	0.000253116	0.00016937	0.00149221	0.0473578	0.000454755	0.00170967	0.00937818	0.00103027	0.00265395	0.000762671	0.0385617	0.000522621	0.00307902	0.00244093	0.00917423	0.000658379
DGRP_439	0.023569	0.00354759	0.000637556	0.0332629	0.000752407	0.000713065	0.0376258	0.441167	0	0.0167154	0.142284	0.000347816	0.00195391	0.0247619	0.00393456	0.0060153	0.00823074	0.00996301	0.00285623	0.023938	0.100714	0.00116061	0.0236562	0.000734732	0.00287213	0.000860123	0.000220456	0.00259451	0.0290023	0.000549616	0.00160135	0.0139262	0.000594317	0.0045254	0.00103932	0.0219706	0.000195963	0.00317544	0.00378657	0.00408283	0.000312453
DGRP_440	0.0025219	0.00370217	0.000952214	0.0125293	0.00139618	0.00196673	0.0135251	0.372264	0.00155525	0.0196971	0.0966664	0.000845116	0.00276251	0.0156578	0.00444124	0.00517373	0.013749	0.0283173	0.00599016	0.0535735	0.0725491	0.00121617	0.0554496	0.00141134	0.00249353	0.000285125	0.000218468	0.00930499	0.0587029	0.000874766	0.00186365	0.0403868	0.00155705	0.00309257	0.00454075	0.0588084	0.000292305	0.0123168	0.00349844	0.0125015	0.000931199
DGRP_441	0.0219132	0.0027806	0.000702926	0.0235032	0.000821845	0.000413019	0.0170127	0.406048	0.00297209	0.0256794	0.167068	0.00032391	0.00146131	0.0144981	0.00281671	0.00389788	0.00737357	0.00813667	0.0110349	0.0226563	0.0657044	0.00192861	0.0319753	0.000436377	0.00135813	0.00030391	0.000177581	0.00350407	0.0258827	0.000450288	0.00304716	0.031145	0.000855312	0.00262369	0.0031954	0.0469769	0.000389138	0.0177693	0.00492659	0.0147706	0.00146493
DGRP_443	0.0212368	0.00305052	0.000439739	0.0264921	0.000978466	0.000332835	0.0258445	0.391316	0.00273477	0.0188056	0.143155	0.000289359	0.00142219	0.0169908	0.00436833	0.00521691	0.00709384	0.00672792	0.0049962	0.0196555	0.113004	0.00321003	0.0238416	0.000886923	0.00120402	0.000499619	0.000199687	0.00287084	0.0394067	0.000521466	0.00346736	0.0228149	0.00123515	0.00292364	0.00236989	0.0512733	0.000411787	0.0109471	0.00436298	0.0123892	0.000984147
DGRP_486	0.0251988	0.00375339	0.00102066	0.0278664	0.00148667	0.000612033	0.0199709	0.449239	0.00298891	0.0313074	0.154465	0.00059061	0.00187024	0.0150638	0.00304073	0.00494038	0.00708527	0.0176868	0.00801744	0.0160894	0.0532332	0.00173529	0.0228648	0.00101881	0.00198614	0.000226434	0.000111292	0.00212899	0.0415992	0.000376082	0.00177968	0.0140965	0.00111212	0.00355883	0.00141976	0.0427372	0.000604	0.00491677	0.00307273	0.00827663	0.000680935
DGRP_491	0.0118169	0.00215373	0.000317132	0.0226678	0.00132784	0.000398209	0.0123742	0.364943	0.00312406	0.0272182	0.17375	0.0005008	0.00187755	0.0149703	0.00444123	0.00501078	0.00901142	0.0180572	0.00785533	0.0351214	0.151135	0.00387923	0.0279354	0.000820238	0.00261235	0.000470478	0.000242666	0.00204479	0.0386134	0.000694043	0.00367437	0.0112128	0.000660403	0.00321698	0.00077405	0.025649	0.000669459	0.00234474	0.00205672	0.00364181	0.000340529
DGRP_502	0.0073209	0.00151663	0.000107267	0.0205645	0.000864401	0	0.0147658	0.268947	0.00293379	0.0200239	0.171407	0.000234431	0.00154164	0.0170764	0.00510317	0.00505905	0.0121563	0.0133788	0.00254484	0.046055	0.21881	0.00638236	0.0407401	0.000848492	0.0019728	0.00110531	0.000390932	0.00394575	0.0417172	0.0010638	0.00458996	0.0210137	0.000707849	0.00277268	0.00156077	0.0285522	0.000188703	0.00476057	0.00193017	0.00479549	0.000550507
DGRP_508	0.00977086	0.00236933	0.000576321	0.0181772	0.00185744	0.000451869	0.0174498	0.328889	0.00275316	0.0202691	0.158623	0.00034816	0.00199188	0.0107589	0.00376941	0.00418777	0.00937172	0.0150224	0.00422598	0.0284496	0.121813	0.00341168	0.0376655	0.00107431	0.00149633	0.000481906	0.000723859	0.00378067	0.0569197	0.00100125	0.00568469	0.0238652	0.00132808	0.00309034	0.00208108	0.0684743	0.000697298	0.00672663	0.00315871	0.0158981	0.00131454
DGRP_509	0.00754038	0.00301508	0.000353933	0.0176177	0.00120995	0.000421435	0.0173208	0.280966	0.00273632	0.0250058	0.144028	0.000663905	0.0019759	0.0111637	0.00632367	0.0065289	0.00982898	0.0225364	0.00791573	0.0400315	0.180386	0.00480119	0.0350608	0.00155231	0.00196711	0.000564685	0.000486911	0.00332607	0.0681478	0.00117173	0.00681266	0.0175031	0.00128902	0.00314272	0.00156716	0.045066	0.000497188	0.0046266	0.00251637	0.0111809	0.000825103
DGRP_517	0.0138158	0.00207957	0.0001609	0.0269888	0.000936647	3.60973e-05	0.0183345	0.307879	0.00276948	0.0239349	0.138247	0.000524452	0.00103527	0.0183985	0.00552116	0.00748875	0.00993812	0.0125657	0.00201755	0.0246259	0.203508	0.00584403	0.0257983	0.0015254	0.00180128	0.00123423	0.000339871	0.00332765	0.0678477	0.0011394	0.00421834	0.0136449	0.00100769	0.00364641	0.00162152	0.0352089	0.00130517	0.0030793	0.00132778	0.00446083	0.00052311
DGRP_530	0.00420214	0.00347262	0.00148715	0.0148284	0.00179804	0.000422122	0.0117057	0.446714	0.00302145	0.0129738	0.111298	0.0014499	0.00175266	0.0168543	0.00310266	0.00431416	0.0169392	0.0431847	0.00221285	0.0336944	0.0398534	0.000825525	0.0599049	0.00188913	0.00189524	4.65793e-05	3.95527e-05	0.00754522	0.0663404	0.000273926	0.000691632	0.0245017	0.00127728	0.00202934	0.00211242	0.0404208	0.000225078	0.0040027	0.00119609	0.00895591	0.000544199
DGRP_531	0.0165423	0.00197215	0.000251315	0.0339018	0.00146223	0.000191791	0.0196104	0.305326	0.00235592	0.0125034	0.12672	0.000437898	0.00148143	0.0232993	0.00461404	0.00936662	0.00992389	0.0132115	0.0096836	0.0228475	0.171127	0.00363446	0.0194587	0.00170599	0.00182826	0.0013066	0.00028854	0.00312723	0.0814594	0.000662283	0.00418655	0.0135904	0.00148515	0.00422789	0.00194338	0.0575606	0.00086224	0.00468411	0.00334925	0.00700745	0.000592208
DGRP_535	0.00466352	0.00294026	0.00077469	0.0198576	0.00111432	0.000390085	0.0153621	0.365773	0.0026237	0.0249513	0.121454	0.000550306	0.00304881	0.0175111	0.00424609	0.00697377	0.0136399	0.0185524	0.00485867	0.0426957	0.0960475	0.00196071	0.045003	0.0010624	0.00457629	0.000471556	0.000270787	0.00771704	0.0480981	0.00107784	0.00309897	0.0321292	0.000989748	0.00662699	0.00361255	0.0438201	0.000368996	0.00963925	0.00769099	0.0121989	0.00151438
DGRP_551	0.0101839	0.00428856	0.000851755	0.0142942	0.00173971	0.000693353	0.0198553	0.353408	0.00347026	0.0275931	0.122063	0.000809481	0.0020706	0.0102734	0.00402536	0.0061249	0.00604657	0.0278555	0.00830335	0.0195723	0.0556946	0.00108696	0.0312359	0.0016592	0.00203682	0.0001757	0.000207081	0.00296727	0.0786317	0.000734104	0.0016474	0.0256284	0.00239817	0.00352507	0.00235379	0.101655	0.000421201	0.0124196	0.00473912	0.0252752	0.00150996
DGRP_555	0.0101398	0.0031404	0.000303622	0.0176809	0.00114764	0.000674857	0.0182611	0.310443	0.00205119	0.0208957	0.136199	0.000488693	0.00175566	0.0126867	0.00556244	0.00458034	0.00676282	0.0147346	0.00937285	0.0308391	0.145519	0.00375027	0.0267435	0.00113277	0.00117421	0.000627812	0.000504424	0.00265411	0.053608	0.00151233	0.00923957	0.0236917	0.00165243	0.00215466	0.00234525	0.0697204	0.000844321	0.0150238	0.00418921	0.0233757	0.00218584
DGRP_559	0.009658	0.00369785	0.000214705	0.0122993	0.000519369	0.000537685	0.0317696	0.276592	0.00309461	0.021223	0.126942	0.000295075	0.00153779	0.00872219	0.00776516	0.00517736	0.00520244	0.00742999	0.00706343	0.023437	0.217959	0.00623025	0.0249568	0.00145531	0.000636115	0.00089565	0.000441353	0.00172635	0.0749321	0.00126146	0.00354818	0.0176014	0.00197427	0.00199824	0.001034	0.0729836	0.000358273	0.00434701	0.00145704	0.00943438	0.000567379
DGRP_563	0.00531651	0.0021327	0.000315733	0.0196217	0.000471564	0.000702862	0.0234457	0.253952	0.00257952	0.0200096	0.148818	0.000324042	0.00191164	0.0162686	0.00514604	0.0053651	0.0159189	0.010785	0.00540844	0.046394	0.152184	0.0039705	0.0516824	0.000826369	0.00150494	0.00133515	0.000692059	0.00935094	0.0383468	0.00152782	0.00860134	0.0481464	0.00112775	0.00273044	0.00577535	0.0485767	0.00098669	0.0180699	0.00412178	0.0137947	0.0015414
DGRP_584	0.00501075	0.00224128	0.000235568	0.0195485	0.000424954	0.000457177	0.0187626	0.260638	0.00274898	0.0237619	0.156666	0.000258191	0.00174673	0.0167594	0.00508378	0.00642479	0.0142487	0.0109575	0.00647463	0.0438433	0.177137	0.00503903	0.0472941	0.000765984	0.00185413	0.000877394	0.000980923	0.00655889	0.0371722	0.00101123	0.00594353	0.0366275	0.000921336	0.00409064	0.00368558	0.0452344	0.000625812	0.0123197	0.00391063	0.0104706	0.00108095
DGRP_589	0.00982253	0.00222438	0.000276273	0.0170109	0.00117178	0.000297992	0.0220924	0.317522	0.00248788	0.0219877	0.174418	0.000460426	0.00159161	0.0118983	0.00359993	0.00462359	0.00904788	0.0272312	0.00284047	0.0323724	0.115322	0.00284365	0.0394233	0.00119593	0.00225175	0.00041407	0.000469362	0.00319201	0.0654713	0.000622434	0.00253052	0.0218672	0.00109237	0.00429336	0.0017588	0.0518456	0.000378651	0.00721779	0.0036918	0.00986232	0.00127792
DGRP_595	0.0119337	0.00248341	0.000185146	0.0170372	0.000891086	0.00036661	0.0219924	0.3422	0.00248058	0.0289179	0.149098	0.000262618	0.00152512	0.0158258	0.00436245	0.00481323	0.00738379	0.0103318	0.0131815	0.0399646	0.165224	0.00375344	0.0328211	0.000789238	0.00145533	0.000709692	0.000356737	0.00304707	0.0438303	0.000984927	0.00446004	0.0195035	0.000652956	0.0022404	0.00112515	0.0307963	0.000286565	0.00429901	0.00189429	0.00577108	0.000560533
DGRP_639	0.0128477	0.0027586	0.000358728	0.0228367	0.00102779	0.000415551	0.016529	0.319491	0.00161381	0.0243652	0.19906	0.000507847	0.00196872	0.0131508	0.00401301	0.00477204	0.0112742	0.0213198	0.00795817	0.034338	0.118186	0.00309291	0.038012	0.00112052	0.0030232	0.000463243	0.000250691	0.00329242	0.0471638	0.000547431	0.00350365	0.0182084	0.000919345	0.00527846	0.0014527	0.0378289	0.000634076	0.00529051	0.00342656	0.00691828	0.000689014
DGRP_642	0.0119195	0.00224157	0.000343725	0.0216923	0.00143566	0.000249462	0.0184417	0.307341	0.00241972	0.0244192	0.176076	0.000477533	0.00138716	0.011515	0.00377773	0.00472046	0.00836684	0.0248921	0.00684135	0.0263832	0.120842	0.00281148	0.0336933	0.00124336	0.00200061	0.000962167	0.000492395	0.00306235	0.0635702	0.00133391	0.00331524	0.0227436	0.00128382	0.00392035	0.00203471	0.0549657	0.00059202	0.00848957	0.00364555	0.0127875	0.00115122
DGRP_646	0.00371958	0.00203644	6.26668e-05	0.00997145	0.00106657	0.000147313	0.0192985	0.174535	0.00229037	0.0249654	0.0788429	0.000681135	0.00157665	0.0111921	0.010274	0.00673317	0.00643845	0.0151031	0.0028933	0.0355821	0.304751	0.00860006	0.0265056	0.00278797	0.00108723	0.00120286	0.00106676	0.00348405	0.100656	0.00164445	0.0127729	0.0191868	0.00274101	0.00252998	0.00180789	0.0809056	0.000616573	0.00540662	0.00219102	0.011209	0.000908328
DGRP_703	0.0180445	0.0020564	5.2818e-05	0.0296555	0.00152634	0.000183728	0.0252832	0.230989	0.00236641	0.0212282	0.177521	0.000250782	0.00132134	0.0134132	0.00574241	0.00564615	0.00895326	0.00699679	0.00338384	0.019511	0.180685	0.00751042	0.0224871	0.00148767	0.000919237	0.00103374	0.0012052	0.00208562	0.0660543	0.000667264	0.0250229	0.0143752	0.00182219	0.00347315	0.00159423	0.0728233	0.00163433	0.00642309	0.00349855	0.0100285	0.00104329
DGRP_705	0.0103508	0.00235324	0.000436237	0.0208757	0.000581248	0.000590292	0.0188545	0.334945	0.00214302	0.0275627	0.172825	0.000330276	0.00154062	0.0137209	0.00472631	0.00551638	0.0120876	0.0152872	0.00972686	0.0386028	0.15269	0.00217383	0.0410972	0.000706483	0.00154936	0.00035111	0.0002642	0.00361107	0.034334	0.000509561	0.00267005	0.0177407	0.00066508	0.0022142	0.00130218	0.0302609	0.000531637	0.00418899	0.00140888	0.00782357	0.00072179
DGRP_707	0.0153576	0.00391272	0.00105417	0.0151776	0.00245588	0.000282617	0.0186716	0.416641	0.00237887	0.0227381	0.139538	0.0016409	0.00160872	0.00997392	0.00253817	0.00265764	0.00706033	0.0599767	0.0017685	0.0198657	0.0353894	0.001435	0.0343284	0.00259315	0.00273045	4.58367e-05	0.000111036	0.00207545	0.0916229	0.000258194	0.000945233	0.0105445	0.00137919	0.00439283	0.000801089	0.0469575	0.000609004	0.00213881	0.00134811	0.0139945	0.000785193
DGRP_712	0.0195473	0.00382342	0.000882023	0.0233846	0.000990244	0.00138745	0.0500191	0.465152	0.00311256	0.0137271	0.127612	0.000375043	0.00206914	0.0194247	0.00272708	0.0049179	0.00724539	0.0142641	0.00351048	0.0215271	0.0475295	0.00120113	0.0245208	0.000986549	0.00157156	0.000237221	0.000176769	0.00279327	0.0456488	0.000343874	0.00136668	0.0156875	0.000967246	0.00318296	0.00161259	0.0472098	0.00045168	0.00458763	0.00304684	0.010664	0.000515883
DGRP_714	0.00971661	0.00233808	0.000461933	0.0278924	0.000821478	0.000342424	0.016812	0.339841	0.00281694	0.0236446	0.176504	0.000494029	0.00181542	0.0181119	0.00416445	0.00655348	0.0151281	0.0207244	0.0048136	0.0345537	0.125138	0.00318587	0.0386923	0.000977973	0.00250078	0.000492795	0.000249182	0.00437892	0.0437635	0.000481628	0.00224042	0.0178734	0.000839433	0.00372872	0.00165298	0.0326244	0.000497036	0.0038764	0.00243853	0.0062642	0.00042096
DGRP_716	0.0279984	0.00429793	0.00162427	0.02816	0.00106882	0.000663602	0.0208357	0.473863	0.00292658	0.0169249	0.139657	0.000504063	0.0013258	0.0151911	0.00242783	0.00285333	0.00750318	0.0153698	0.00541873	0.0160863	0.0275289	0.000656987	0.0292657	0.000907904	0.00102447	0.000267642	0.000298252	0.00365315	0.0341764	0.000394096	0.00181044	0.0249276	0.00127944	0.00136804	0.00297018	0.0517372	0.0012609	0.0136734	0.00191259	0.0145706	0.00139438
DGRP_721	0.0130268	0.00454602	0.00117743	0.0187705	0.00188487	0.000708111	0.0206572	0.473317	0.00310219	0.0206246	0.101825	0.000430431	0.00164015	0.0163437	0.00378479	0.00524396	0.00542859	0.0153667	0.0052089	0.0264248	0.0607833	0.00114696	0.0221538	0.000882329	0.00102548	0.000313355	0.000380094	0.00279738	0.0412186	0.000521121	0.00221383	0.0215992	0.00131993	0.0016914	0.0023282	0.0604467	0.000577533	0.012961	0.00292626	0.0215271	0.00161229
DGRP_727	0.0266944	0.00491225	0.00230116	0.0335991	0.00180805	0.000469939	0.0183537	0.527184	0	0.0172333	0.122565	0.00115469	0.00272628	0.0222456	0.00326362	0.00632375	0.00716305	0.0286592	0.00819968	0.0128453	0.0440544	0.00077048	0.0167239	0.00146368	0.00448378	0.000275992	9.78034e-05	0.00157353	0.0423561	0.000259489	0.000810273	0.00656198	0.000704316	0.00445157	0.000535167	0.0192682	9.31728e-05	0.00141984	0.00303617	0.00310295	0.000255596
DGRP_730	0.0110242	0.00194724	0.000456452	0.0193921	0.0013391	0.000711004	0.0373941	0.275663	0.00273019	0.0178356	0.167624	0.000736319	0.00228141	0.0173567	0.00498745	0.00643012	0.00919774	0.032438	0.00480257	0.0467651	0.167274	0.00214732	0.0330645	0.00141223	0.00216072	0.000676881	0.000465862	0.00228692	0.0623109	0.000829181	0.00353341	0.0127065	0.000918276	0.00272276	0.000816656	0.034344	0.000340369	0.00267252	0.00154266	0.00611685	0.000489388
DGRP_732	0.00744572	0.00266021	0.000217088	0.0153026	0.000786709	0.000513112	0.0158127	0.273858	0.002126	0.02793	0.138633	0.000299424	0.00168158	0.0115869	0.00637278	0.00599993	0.0075086	0.0108213	0.0099919	0.0461564	0.205277	0.00346821	0.0336745	0.000888047	0.00128986	0.00105065	0.000504202	0.0038203	0.0435623	0.0022376	0.00587659	0.0313703	0.00106636	0.0024764	0.00239357	0.0458955	0.000495963	0.0115287	0.00338497	0.0125493	0.00112586
DGRP_737	0.0218325	0.00351947	0.000791828	0.0335631	0.00106252	0.000220509	0.0184043	0.398442	0.00251452	0.0168819	0.140453	0.000507526	0.00155181	0.0207758	0.0035387	0.00571483	0.0101552	0.0161016	0.00816566	0.0162983	0.0594381	0.000897404	0.0295685	0.00146184	0.00155539	0.000480166	0.000428144	0.00445129	0.0640965	0.000345685	0.00127879	0.0238388	0.00170173	0.00286477	0.00244361	0.0633611	0.000210622	0.00750833	0.0030185	0.00961269	0.000822185
DGRP_738	0.00588961	0.00189508	2.99827e-05	0.019127	0.000454082	6.68317e-05	0.0181168	0.205161	0.00239137	0.0186737	0.11787	0.000224291	0.00148264	0.0174507	0.00781786	0.0079976	0.0112848	0.00827927	0.00494003	0.0337719	0.311711	0.0109695	0.0270913	0.00132566	0.00178197	0.00180185	0.000572848	0.00360119	0.0610968	0.00108651	0.00551462	0.0186738	0.0011515	0.00492208	0.00214557	0.0471114	0.000298513	0.00591182	0.00399983	0.0058255	0.000482804
DGRP_748	0.00539157	0.00120775	0	0.0144384	0.000490824	8.74007e-05	0.0177636	0.122926	0.0017241	0.0123676	0.161553	0.000176053	0.00159142	0.0094792	0.0065598	0.00554337	0.0109978	0.00669611	0.00940267	0.0408768	0.304406	0.0124123	0.0448083	0.00139438	0.00195934	0.00159286	0.00070218	0.00485147	0.0721425	0.00172019	0.00767046	0.0329188	0.00123619	0.00581693	0.00239791	0.0531016	0.000338329	0.00802339	0.0044531	0.00804339	0.000737038
DGRP_761	0.0156107	0.0032871	0.000584137	0.0184594	0.000942549	0.000383231	0.0206312	0.486192	0.00336728	0.0293726	0.12572	0.000268559	0.00126512	0.0168664	0.00360761	0.00457613	0.00562714	0.00998951	0.00349212	0.0245194	0.0989172	0.00270216	0.0213042	0.000543599	0.00123541	0.000356058	0.000266291	0.00197533	0.0241744	0.000428285	0.00368517	0.0158426	0.000643871	0.00205102	0.00146757	0.0310157	0.00067299	0.0073442	0.00300595	0.00694067	0.000600483
DGRP_765	0.0150761	0.00241042	0.000589848	0.0344917	0.00131543	0.000996501	0.0264925	0.284749	0.0028142	0.0254757	0.220789	0.000758947	0.00316079	0.0155979	0.00394602	0.00594951	0.0168096	0.0268268	0.00510472	0.0328165	0.111596	0.00162316	0.0491617	0.00113803	0.00527459	0.000344593	0.000204977	0.00440534	0.0433787	0.000665006	0.00176795	0.0162026	0.000573796	0.00508875	0.00113153	0.0200322	0.000273219	0.00312421	0.00246887	0.00477555	0.000597861
DGRP_774	0.0202438	0.00305317	0.000906207	0.0343149	0.00136453	0.000791776	0.0268216	0.364673	0.00294755	0.026429	0.187313	0.000463518	0.00248085	0.0201278	0.00408765	0.00746527	0.0111016	0.0199179	0.00499999	0.0290682	0.117482	0.0015758	0.0298625	0.000735873	0.00276539	0.000478974	0.000197671	0.00260452	0.0306423	0.000576403	0.00218453	0.0120752	0.000462416	0.00325035	0.000953412	0.0172914	0.000160542	0.00303067	0.00212957	0.00243141	0.000449436
DGRP_776	0.000927133	0.0032987	0.00155045	0.00465338	0.00137639	0.00304637	0.0100855	0.215092	0.00231214	0.0356355	0.0214226	0.00110927	0.00182103	0.0104108	0.00445103	0.012238	0.0057465	0.0172605	0.00725328	0.0330789	0.0600176	0.00260308	0.0213043	0.00226187	0.00119633	0.000548257	0.000775647	0.00911216	0.0535261	0.002416	0.00634987	0.0389494	0.0056207	0.00211868	0.0129679	0.173156	0.00195212	0.049191	0.00671248	0.143686	0.0117457
DGRP_783	0.0146691	0.00335945	0.000720065	0.0249308	0.000959807	0.000911791	0.0307472	0.38769	0.00277762	0.0302643	0.140284	0.000503254	0.00268556	0.0205579	0.00407918	0.00763695	0.00856998	0.0181414	0.0108588	0.0262939	0.100117	0.00292937	0.0213063	0.00121498	0.00371656	0.000481106	0.000229463	0.00234635	0.0434921	0.000611242	0.00296624	0.0130153	0.000846104	0.00893071	0.00159931	0.038861	0.000266359	0.00502913	0.00692169	0.00779727	0.000681489
DGRP_786	0.00810755	0.00249272	0.000146868	0.0238316	0.000834187	0.000505138	0.0227711	0.268394	0.00271979	0.023232	0.158075	0.000524567	0.00188057	0.0162839	0.0054687	0.00676045	0.0124081	0.0219316	0.00619446	0.0438059	0.174984	0.00308253	0.0316115	0.00122415	0.00165575	0.000556575	0.000340869	0.00426513	0.0535998	0.000725175	0.00339022	0.0230104	0.00100345	0.00362522	0.00307894	0.0423911	0.00119957	0.00848699	0.00361775	0.00983421	0.00110505
DGRP_787	0.0148799	0.0037426	0.000719876	0.0343092	0.000729866	0.000659522	0.0333827	0.382414	0.00281499	0.0190132	0.142875	0.000441815	0.00221644	0.0246331	0.00391903	0.00661806	0.0138849	0.0175931	0.00242355	0.0303856	0.0637574	0.00110599	0.0333581	0.00147557	0.00209795	0.000361825	0.000221803	0.00554455	0.0537822	0.000339104	0.00103499	0.0231648	0.00114963	0.00554533	0.00282031	0.0463043	0.000343739	0.00713347	0.00307549	0.00857566	0.00115148
DGRP_790	0.0236594	0.00158442	0.000303327	0.0362206	0.00114169	0.000800022	0.0214001	0.173598	0.00152623	0.0110333	0.296145	0.000348966	0.00179158	0.0111418	0.00184465	0.00195682	0.0160082	0.0155433	0.00945078	0.0266307	0.0364445	0.00108934	0.0878816	0.00114519	0.00182483	0.000278943	0.000242828	0.00958837	0.0486426	0.000512827	0.0014344	0.0641169	0.00116104	0.00458226	0.0042862	0.0495962	0.000228171	0.0173757	0.00377011	0.0124412	0.00122761
DGRP_796	0.0232314	0.00140599	7.12927e-05	0.0200986	0.00193971	0.000284407	0.0335539	0.164101	0.0021272	0.0148987	0.250233	0.000737141	0.00113169	0.00635515	0.00230506	0.00190123	0.00895725	0.0365818	0.00139782	0.0201157	0.0550984	0.00130396	0.0706884	0.00249788	0.00131553	0.000432925	0.000305989	0.00481547	0.131035	0.000689696	0.00105458	0.0427773	0.00189097	0.00255873	0.0017676	0.0686937	0.000469279	0.00650044	0.00143658	0.0118171	0.00120957
DGRP_799	0.00889897	0.00256509	0.000424674	0.017575	0.00111158	0.000552484	0.0229271	0.318301	0.00351021	0.0217369	0.135733	0.000371278	0.00135148	0.0143009	0.00343651	0.00340086	0.00888527	0.0201345	0.00502967	0.0259864	0.0730911	0.00227226	0.0391095	0.00140088	0.0013561	0.00036965	0.000250609	0.00539961	0.0729272	0.000478296	0.00251124	0.0401107	0.00176078	0.00458619	0.00430646	0.0903687	0.000346347	0.0183018	0.0033882	0.0203035	0.00112829
DGRP_801	0.0123755	0.00377485	0.00117871	0.0276363	0.00144212	0.00114072	0.0270429	0.385124	0.00340418	0.0230676	0.161515	0.000393575	0.00253311	0.0183896	0.00408933	0.00639816	0.0117022	0.0151874	0.00756705	0.0318415	0.0834937	0.00172475	0.0340882	0.00109354	0.0021585	0.000426544	0.000335814	0.0042498	0.0475488	0.000663048	0.00250619	0.0185523	0.000851406	0.0030559	0.00195569	0.0375054	0.00076909	0.00433286	0.00260294	0.0058747	0.000407464
DGRP_802	0.00247373	0.00320761	0.00067787	0.0114765	0.00127896	0.00112083	0.0139441	0.291732	0.00133998	0.0233207	0.110523	0.000635301	0.00239088	0.0124955	0.0062221	0.00752209	0.0132406	0.0233243	0.0102512	0.0556145	0.165536	0.00366167	0.0432163	0.00159248	0.00208659	0.000644703	0.000631485	0.00530026	0.0742643	0.00126191	0.00409322	0.0215549	0.00153516	0.0033918	0.00217974	0.0594037	0.00040642	0.00458214	0.00242157	0.00849953	0.000678789
DGRP_804	0.0165689	0.00330529	0.00117517	0.034493	0.00280701	0.000958808	0.0210121	0.353107	0.00350638	0.0207949	0.160615	0.00106492	0.00302379	0.0147917	0.00324936	0.00510902	0.0120369	0.0461368	0.00368258	0.0190249	0.0486558	0.00128718	0.0347775	0.00194171	0.00440851	0.000301473	0.000147087	0.0044784	0.0791985	0.000460134	0.00109714	0.0186346	0.00134519	0.00537403	0.00191991	0.0509479	0.000277699	0.00498469	0.00394354	0.00856646	0.000788814
DGRP_805	0.0174828	0.00398628	0.000928422	0.0237478	0.00147157	0.00248782	0.0527621	0.419982	0.00321608	0.0190759	0.14549	0.000882477	0.00232295	0.0163406	0.00378428	0.00465967	0.00764314	0.0329102	0.00489149	0.0216176	0.0625032	0.00131932	0.0242853	0.00151521	0.00265007	0.000240332	0.000155321	0.00190787	0.0593359	0.0002984	0.00105831	0.00978917	0.00100754	0.00314671	0.000788143	0.0345983	0.000395948	0.00228054	0.00212335	0.00455352	0.00036445
DGRP_808	0.0233956	0.00205462	0.000623877	0.0461496	0.00197678	0.00064359	0.0116267	0.242239	0.00222989	0.0124751	0.262676	0.000776307	0.00183918	0.0109694	0.0022848	0.00390621	0.0166517	0.0367221	0.00569061	0.0144898	0.0420846	0.00107731	0.0543732	0.00161493	0.00297318	0.000170223	0.000297006	0.00554312	0.0760992	0.000209336	0.00103727	0.0297997	0.00139988	0.00397382	0.00238146	0.0572542	0.00022363	0.00795248	0.00346331	0.00790907	0.000742207
DGRP_810	0.00559024	0.0019139	8.19697e-05	0.0145893	0.000873797	0.00043935	0.0139045	0.236656	0.00242832	0.0176031	0.138157	0.000498646	0.00128955	0.0116479	0.00588101	0.00529901	0.00897593	0.0202179	0.00971731	0.0427528	0.217104	0.00549577	0.031698	0.00156666	0.00150516	0.000839724	0.000581568	0.00280729	0.0752529	0.00109937	0.00871003	0.0188064	0.00166379	0.0029009	0.00180154	0.0661866	0.000902832	0.0068254	0.00297938	0.0116862	0.000943459
DGRP_812	0.0082055	0.00186308	0	0.0226089	0.000765344	6.6705e-05	0.0156634	0.20028	0.00226124	0.0135512	0.131788	0.000192102	0.00119914	0.0142703	0.00638064	0.00649146	0.0110519	0.00679116	0.00791507	0.025597	0.227463	0.00829367	0.0295239	0.00154195	0.00123463	0.00145529	0.000634897	0.00418202	0.0774756	0.000955255	0.00755583	0.0260058	0.00217706	0.00531839	0.00312477	0.09146	0.000551427	0.0102219	0.00542221	0.0173635	0.00109627
DGRP_818	0.0338853	0.00499729	0.00172861	0.0438628	0.00209063	0.00143334	0.0238621	0.430846	0.00335476	0.0156878	0.152478	0.000992389	0.00368322	0.0209419	0.0031848	0.00627095	0.00946208	0.0193273	0.0121542	0.0142373	0.0416698	0.000788883	0.0218715	0.00143033	0.00388372	0.000310343	0.000164618	0.00293609	0.0447206	0.000421943	0.00153467	0.0122794	0.00113569	0.00548158	0.00160183	0.0365714	0.000322964	0.00412461	0.00536728	0.00817138	0.000729938
DGRP_819	0.0178879	0.00291086	0	0.0182825	0.00196428	7.86813e-05	0.0199423	0.269326	0.00220444	0.014373	0.14449	0.000839231	0.000980732	0.00733739	0.00429499	0.00337047	0.00561706	0.0296464	0.00349083	0.0127723	0.11028	0.00364905	0.0202106	0.00425783	0.00168815	0.000281989	0.000159446	0.00149477	0.171996	0.000281522	0.00199922	0.00995271	0.00259083	0.00505714	0.00107354	0.0893633	0.000330539	0.00293257	0.00201534	0.00991346	0.000663188
DGRP_820	0.0199258	0.00434754	0.000982171	0.0210753	0.00182402	0.00129084	0.0295941	0.411559	0.0028024	0.0251934	0.140031	0.00102537	0.00154716	0.0120789	0.00330596	0.00418233	0.00708445	0.0401358	0.00929991	0.017309	0.0557048	0.00111384	0.0283248	0.00195313	0.00173281	0.000223984	0.000462262	0.00216103	0.0795456	0.000341702	0.00100417	0.0129985	0.00128107	0.00204301	0.000809716	0.045327	0.000261996	0.00276889	0.00122267	0.00568417	0.000406515
DGRP_821	0.0144974	0.00367413	0.000889916	0.0186218	0.00122241	0.000905434	0.0423225	0.485822	0	0.0177152	0.124376	0.000876179	0.00161162	0.0193833	0.00331165	0.00419487	0.00622584	0.0259685	0.00865104	0.022568	0.0630962	0.00140794	0.020575	0.00125642	0.00231363	0.0002519	0.000124438	0.00143202	0.0535526	0.000244767	0.00110725	0.00785922	0.000817488	0.00290573	0.000593627	0.0301458	0.000159193	0.00185167	0.00169348	0.00520867	0.000565167
DGRP_822	0.012096	0.00232386	0.000368469	0.0195512	0.00206776	0.000403273	0.016245	0.28732	0.00267993	0.0212251	0.214769	0.000785701	0.00212416	0.00864227	0.00335958	0.00432879	0.010108	0.0434427	0.00885981	0.0247115	0.0857276	0.00224023	0.0456102	0.00158339	0.00358416	0.000239363	0.00105812	0.00335762	0.0772446	0.000390823	0.00149988	0.0198436	0.00106941	0.00493966	0.00133829	0.0462042	0.000171969	0.0044929	0.00300335	0.0100685	0.000920056
DGRP_832	0.0109402	0.00461001	0.00158463	0.0158929	0.00226267	0.00136309	0.038379	0.524357	0	0.0170005	0.111358	0.000909807	0.00204608	0.01684	0.00257782	0.00320615	0.00655657	0.0332878	0.00284123	0.0283473	0.0277795	0.000407272	0.0265617	0.00122354	0.0015622	6.96693e-05	0.000250669	0.00217119	0.0498084	0.000233249	0.00036621	0.0104014	0.00092728	0.00164376	0.000824197	0.0375348	0.000370807	0.0027638	0.00119151	0.00880937	0.000738944
DGRP_837	0.0135696	0.00272972	0.000186726	0.0259116	0.000838879	0.000306906	0.0251081	0.317825	0.00309633	0.0215483	0.127662	0.000194036	0.00164795	0.0215739	0.00605036	0.00582028	0.0084185	0.00374633	0.00552248	0.0236388	0.170885	0.00793225	0.0219718	0.0012103	0.00144669	0.00170111	0.000593268	0.00308486	0.0455868	0.00141281	0.0103663	0.0199327	0.0014807	0.00477488	0.00218394	0.0578682	0.000644749	0.0099809	0.00753119	0.0126286	0.00138761
DGRP_843	0.0166034	0.00288341	0.000714112	0.023346	0.00189464	0.000453464	0.0173638	0.345379	0.00322644	0.0245797	0.174622	0.000391922	0.00149599	0.0117861	0.00381135	0.00598155	0.0087263	0.0154976	0.00479803	0.0222746	0.108762	0.00256339	0.0321037	0.00129978	0.00166532	0.000688264	0.000303084	0.00273683	0.0662379	0.000925382	0.00368215	0.0170389	0.00112363	0.00368151	0.00127709	0.0503887	0.000549868	0.00415818	0.00293153	0.0111693	0.000780213
DGRP_849	0.0157748	0.00306961	0.000459614	0.0225177	0.00144036	0.00064807	0.0315717	0.345089	0.00286866	0.0248131	0.123945	0.00043098	0.00215792	0.016997	0.00473488	0.00549521	0.00638477	0.0113851	0.00592304	0.0235027	0.125388	0.00367826	0.0239559	0.00131935	0.00269705	0.0015156	0.000428226	0.00315486	0.0540976	0.00170943	0.00623717	0.0220747	0.00135359	0.00710127	0.00205315	0.0608405	0.000714098	0.00821944	0.00767461	0.0155379	0.000890141
DGRP_850	0.00545413	0.00468439	0.00143392	0.0161775	0.00174477	0.000864028	0.0168461	0.526111	0	0.0192842	0.0905809	0.000863964	0.00180248	0.0171253	0.0036446	0.00415589	0.00874963	0.0288325	0.00205939	0.0359356	0.0491234	0.000749455	0.0305119	0.00143345	0.00186846	0.000210763	0.000131446	0.00387711	0.053132	0.000436942	0.000961847	0.0163757	0.00101835	0.00205839	0.00152292	0.0359987	0.000394066	0.00427224	0.00151021	0.00757858	0.000483624
DGRP_852	0.00803107	0.0018701	0.000327881	0.0177604	0.00118188	0.000716986	0.0229802	0.265813	0.00275186	0.0192536	0.169642	0.000416713	0.00164336	0.0114386	0.00437812	0.00463956	0.0107935	0.0225004	0.00367694	0.0349851	0.155663	0.00229515	0.043045	0.00115551	0.00160188	0.000326361	0.000292114	0.00417092	0.058813	0.000633477	0.00408439	0.0280595	0.0011846	0.00370808	0.00226328	0.0400176	0.000490486	0.00955399	0.00263738	0.0149167	0.00128962
DGRP_853	0.00564402	0.0036079	0.000869994	0.0191803	0.00240105	0.00126236	0.0220638	0.40375	0	0.022446	0.128658	0.00085779	0.00267496	0.0159907	0.00456244	0.00769056	0.00977537	0.0336844	0.00586379	0.0421694	0.112245	0.00186844	0.0299312	0.00140844	0.00291815	0.00031316	0.000333041	0.00308861	0.0536783	0.000502138	0.00209288	0.0129944	0.000790898	0.00405367	0.0011581	0.0297696	0.000208852	0.00279094	0.00204193	0.00428593	0.000373156
DGRP_855	0.00512679	0.00180378	0.000165556	0.0118702	0.00107459	0.000552372	0.0133814	0.226462	0.00184417	0.0171108	0.145207	0.000381899	0.000891853	0.00775633	0.00460264	0.00411857	0.00835507	0.0240469	0.00991182	0.0305519	0.177645	0.00417583	0.0410749	0.00181907	0.00065845	0.00105072	0.000512475	0.00378283	0.0967582	0.00169548	0.00814642	0.0322591	0.00173756	0.00428082	0.00238734	0.0806381	0.000631732	0.0104475	0.000964567	0.0128323	0.00113117
DGRP_861	0.0105131	0.00294688	0.000274273	0.0205056	0.0017914	0.00071256	0.0265023	0.288432	0.00239601	0.0184514	0.154593	0.000608366	0.0013731	0.0113751	0.00485738	0.00633744	0.0111703	0.0252979	0.00384636	0.0254504	0.141458	0.00343802	0.0435905	0.00185472	0.000971558	0.00124134	0.000490536	0.00513825	0.0768469	0.00135487	0.00484731	0.0263265	0.00115741	0.00225827	0.00214593	0.048031	0.000462994	0.00620832	0.00089125	0.0123329	0.00148119
DGRP_913	0.00491157	0.004641	0.000823422	0.0117162	0.000934259	0.00136388	0.0317717	0.381374	0	0.0265396	0.0995019	0.000752817	0.00213006	0.0132694	0.00575947	0.00711038	0.00769112	0.0259282	0.00523522	0.0413494	0.112097	0.00205784	0.034001	0.00144006	0.0011253	0.0003946	0.00030191	0.00347037	0.0662837	0.000958713	0.00294529	0.0222105	0.00156649	0.00165647	0.00160307	0.057398	0.000300599	0.00614288	0.00124759	0.00920411	0.000558269

## Sheet: C
DGRP line	7,11-heptacosadiene & 2-methylhexacosane	5,9-heptacosadiene & 9-heptacosene
DGRP_31	0.23676	0.187362
DGRP_38	0.193938	0.24898
DGRP_48	0.190672	0.250451
DGRP_100	0.222723	0.323219
DGRP_136	0.146618	0.33724
DGRP_235	0.103269	0.222223
DGRP_309	0.190629	0.177824
DGRP_367	0.12583	0.36753
DGRP_440	0.199915	0.140198
DGRP_509	0.177543	0.275176
DGRP_559	0.235207	0.104988
DGRP_646	0.173282	0.246397
DGRP_732	0.193171	0.173432
DGRP_802	0.184644	0.234057
DGRP_105	0.213738	0.0509743
DGRP_237	0.242139	0.041398
DGRP_324	0.275962	0.0400399
DGRP_551	0.266013	0.0428903
DGRP_555	0.192632	0.0336231
DGRP_776	0.166546	0.0897696
DGRP_786	0.250379	0.0399385
DGRP_21	0.309819	0.0343866
DGRP_26	0.292882	0.0466259
DGRP_28	0.213343	0.0595056
DGRP_40	0.17569	0.0484533
DGRP_41	0.350426	0.024646
DGRP_42	0.417524	0.0280787
DGRP_45	0.297275	0.0414055
DGRP_49	0.286307	0.0452455
DGRP_57	0.345869	0.023712
DGRP_59	0.273063	0.0415324
DGRP_69	0.265073	0.0400444
DGRP_73	0.356444	0.0448673
DGRP_75	0.351608	0.0412179
DGRP_83	0.242671	0.0627695
DGRP_85	0.234049	0.0518016
DGRP_88	0.158404	0.040943
DGRP_91	0.397692	0.0198055
DGRP_93	0.245616	0.0439703
DGRP_101	0.148313	0.0450319
DGRP_109	0.276172	0.0397391
DGRP_129	0.252281	0.0156975
DGRP_138	0.333775	0.0392876
DGRP_142	0.353046	0.0332481
DGRP_149	0.334706	0.0288154
DGRP_153	0.293573	0.0386402
DGRP_158	0.340761	0.0427433
DGRP_161	0.363272	0.0283148
DGRP_176	0.324544	0.0394852
DGRP_177	0.315772	0.0197196
DGRP_181	0.273508	0.041461
DGRP_189	0.302978	0.066118
DGRP_195	0.317075	0.0341543
DGRP_208	0.232995	0.0389839
DGRP_217	0.229622	0.057739
DGRP_223	0.302587	0.0154466
DGRP_227	0.218774	0.0366814
DGRP_228	0.372839	0.0354373
DGRP_229	0.347445	0.031913
DGRP_233	0.260682	0.0453524
DGRP_239	0.389395	0.0261833
DGRP_256	0.357012	0.0243971
DGRP_280	0.315076	0.0253474
DGRP_287	0.387227	0.0344594
DGRP_301	0.202654	0.0491886
DGRP_303	0.226878	0.0328511
DGRP_304	0.28256	0.0519346
DGRP_306	0.262832	0.0496798
DGRP_307	0.299998	0.0370431
DGRP_310	0.311512	0.0211407
DGRP_313	0.281886	0.0522045
DGRP_315	0.407897	0.0443953
DGRP_318	0.379302	0.0428932
DGRP_320	0.264188	0.0414265
DGRP_321	0.258222	0.0580834
DGRP_332	0.257036	0.055386
DGRP_335	0.345025	0.0269966
DGRP_336	0.300462	0.0506245
DGRP_338	0.236606	0.0474788
DGRP_340	0.298125	0.0315975
DGRP_350	0.252118	0.0501782
DGRP_352	0.265373	0.049232
DGRP_356	0.306753	0.0473769
DGRP_357	0.211536	0.0534424
DGRP_358	0.247893	0.0575536
DGRP_359	0.284314	0.0582105
DGRP_360	0.222234	0.0546304
DGRP_361	0.272565	0.0514037
DGRP_362	0.253867	0.0582995
DGRP_365	0.33499	0.0256015
DGRP_370	0.280963	0.0572092
DGRP_371	0.26661	0.0554998
DGRP_373	0.363177	0.0286894
DGRP_374	0.326317	0.0362293
DGRP_375	0.26046	0.0494375
DGRP_377	0.279008	0.048245
DGRP_379	0.365455	0.0315879
DGRP_380	0.321919	0.0344231
DGRP_381	0.327796	0.0466803
DGRP_382	0.353879	0.0338014
DGRP_383	0.248587	0.0552754
DGRP_385	0.251528	0.0461947
DGRP_386	0.268733	0.0656829
DGRP_391	0.210945	0.0473522
DGRP_392	0.308956	0.0387758
DGRP_399	0.208133	0.0461783
DGRP_405	0.194653	0.0485717
DGRP_406	0.204035	0.0712548
DGRP_409	0.293406	0.0510671
DGRP_426	0.279171	0.0488425
DGRP_427	0.237636	0.0372873
DGRP_437	0.261102	0.0403248
DGRP_439	0.307098	0.0403494
DGRP_441	0.239076	0.0400065
DGRP_443	0.278863	0.0440307
DGRP_486	0.180876	0.0367188
DGRP_491	0.27584	0.0385021
DGRP_502	0.265329	0.0300759
DGRP_508	0.324202	0.0394172
DGRP_517	0.390416	0.0400886
DGRP_530	0.396933	0.0323764
DGRP_531	0.285912	0.0401456
DGRP_535	0.251581	0.0499027
DGRP_563	0.199351	0.0560529
DGRP_584	0.20053	0.0537606
DGRP_589	0.273724	0.0483609
DGRP_595	0.217789	0.0631815
DGRP_639	0.248532	0.0404852
DGRP_642	0.236826	0.041076
DGRP_703	0.188633	0.0571126
DGRP_705	0.342516	0.0233629
DGRP_707	0.314761	0.0362652
DGRP_712	0.258988	0.0446237
DGRP_714	0.316287	0.0361806
DGRP_716	0.249075	0.0441733
DGRP_721	0.323833	0.0299405
DGRP_727	0.30101	0.0259469
DGRP_730	0.231535	0.0405807
DGRP_737	0.289177	0.0401391
DGRP_738	0.319801	0.0523807
DGRP_748	0.187915	0.0461059
DGRP_761	0.195169	0.0536845
DGRP_765	0.244069	0.0295043
DGRP_774	0.208766	0.0387216
DGRP_783	0.0522502	0.0166966
DGRP_787	0.271759	0.044539
DGRP_790	0.152278	0.037113
DGRP_796	0.188927	0.0529617
DGRP_799	0.301511	0.0386376
DGRP_801	0.365166	0.0342072
DGRP_804	0.292812	0.0360323
DGRP_805	0.319979	0.039189
DGRP_808	0.29219	0.0285958
DGRP_810	0.225561	0.043367
DGRP_812	0.295447	0.0378761
DGRP_818	0.257661	0.0409549
DGRP_819	0.27915	0.0488318
DGRP_820	0.305031	0.0324991
DGRP_821	0.312048	0.0369549
DGRP_822	0.314381	0.0371179
DGRP_832	0.377243	0.0187141
DGRP_837	0.262033	0.045124
DGRP_843	0.277442	0.0493485
DGRP_849	0.269908	0.0439994
DGRP_850	0.293346	0.0472879
DGRP_852	0.296764	0.0214912
DGRP_853	0.389696	0.0261896
DGRP_855	0.278219	0.0423716
DGRP_861	0.271653	0.0501952
DGRP_Z53	0.0752719	0.317381
DGRP_Z53	0.0803696	0.324644
DGRP_Z53	0.0817287	0.294872					C
DGRP_Z53	0.081695	0.331661
DGRP_Z53	0.0796507	0.339214
DGRP_Z30	0.141767	0.296645
DGRP_Z30	0.146556	0.293436
DGRP_Z30	0.150064	0.270047
DGRP_Z30	0.125257	0.294373
DGRP_Z30	0.147665	0.296794

## Sheet: D
DGRP Line	7-tricosene	5-tricosene	7-pentacosene	5-pentacosene
DGRP_31	0.291102	0.0296865	0.163953	0.00379708
DGRP_38	0.266868	0.0311115	0.185643	0.0030642
DGRP_48	0.253754	0.0190162	0.212424	0.00557045
DGRP_100	0.3712	0.0279364	0.124065	0.00200329
DGRP_136	0.219783	0.0241613	0.272671	0.00358901
DGRP_235	0.254962	0.0190514	0.160494	0.00276027
DGRP_309	0.425374	0.0283313	0.0380408	0.000838586
DGRP_367	0.166912	0.0884034	0.234806	0.0259402
DGRP_440	0.372264	0.0196971	0.0725491	0.00121617
DGRP_509	0.280966	0.0250058	0.180386	0.00480119
DGRP_559	0.276592	0.021223	0.217959	0.00623025
DGRP_646	0.174535	0.0249654	0.304751	0.00860006
DGRP_732	0.273858	0.02793	0.205277	0.00346821
DGRP_802	0.291732	0.0233207	0.165536	0.00366167
DGRP_913	0.381374	0.0265396	0.112097	0.00205784
DGRP_105	0.271442	0.0334379	0.207759	0.0054693
DGRP_237	0.282549	0.0216431	0.256046	0.00936804
DGRP_324	0.385286	0.023779	0.0857969	0.00186645
DGRP_551	0.353408	0.0275931	0.0556946	0.00108696
DGRP_555	0.310443	0.0208957	0.145519	0.00375027
DGRP_776	0.215092	0.0356355	0.0600176	0.00260308
DGRP_786	0.268394	0.023232	0.174984	0.00308253
DGRP_21	0.508577	0.0192487	0.0428455	0.000847774
DGRP_26	0.386019	0.0158072	0.0318991	0.000848441
DGRP_28	0.422403	0.019968	0.0946014	0.00172768
DGRP_40	0.396098	0.0263409	0.0955153	0.00210009
DGRP_41	0.25435	0.0170055	0.0927289	0.00210709
DGRP_42	0.473554	0.0179507	0.0437204	0.000712314
DGRP_45	0.488333	0.0217448	0.0327403	0.000671658
DGRP_49	0.292325	0.0141201	0.140608	0.00177825
DGRP_57	0.438601	0.0186039	0.0363208	0.000833077
DGRP_59	0.228786	0.0151346	0.11199	0.00279045
DGRP_73	0.446753	0.0144761	0.173134	0.00409492
DGRP_75	0.368938	0.0189233	0.0691549	0.000897645
DGRP_83	0.409799	0.0188962	0.113674	0.00178108
DGRP_85	0.329047	0.0238122	0.118924	0.00201349
DGRP_88	0.304011	0.0308579	0.0637729	0.00173127
DGRP_91	0.308446	0.0159354	0.0352623	0.000782239
DGRP_93	0.262112	0.0267933	0.148607	0.00381135
DGRP_101	0.344844	0.0185546	0.173863	0.00333424
DGRP_109	0.416263	0.0206945	0.072052	0.00181741
DGRP_129	0.35343	0.0235658	0.0563804	0.00113733
DGRP_138	0.361014	0.0135629	0.0962666	0.0015336
DGRP_142	0.401252	0.0286083	0.0590141	0.00141848
DGRP_149	0.311597	0.0182554	0.0949439	0.0021705
DGRP_153	0.296161	0.0215089	0.0673021	0.00190743
DGRP_158	0.278974	0.0155528	0.219526	0.00624066
DGRP_161	0.362261	0.0179998	0.158009	0.00478081
DGRP_176	0.34786	0.0258645	0.168242	0.00414145
DGRP_177	0.360837	0.0115369	0.0448455	0.00109259
DGRP_181	0.426918	0.0164945	0.0289193	0.000663693
DGRP_189	0.152568	0.011619	0.348733	0.00487618
DGRP_195	0.402509	0.0228102	0.124593	0.00118157
DGRP_208	0.392101	0.0219312	0.0614231	0.00156601
DGRP_217	0.466951	0.0202473	0.0595578	0.00114238
DGRP_223	0.513423	0.0262961	0.0945609	0.00192797
DGRP_227	0.418997	0.0261627	0.105863	0.00249441
DGRP_228	0.385937	0.024307	0.133337	0.00452779
DGRP_229	0.449357	0.0238223	0.0709089	0.0015021
DGRP_233	0.212224	0.0161921	0.239293	0.00870055
DGRP_239	0.489019	0.0254749	0.0820663	0.00176703
DGRP_256	0.424521	0.0194715	0.0350171	0.000596409
DGRP_280	0.412883	0.0337618	0.0982112	0.00257635
DGRP_287	0.27719	0.0196172	0.140778	0.00416314
DGRP_301	0.268973	0.0295267	0.181372	0.00290207
DGRP_303	0.249494	0.0127924	0.0119493	0.000359531
DGRP_304	0.181059	0.016032	0.282132	0.00338335
DGRP_306	0.377026	0.0206755	0.125887	0.00226819
DGRP_307	0.474883	0.0171945	0.0641922	0.000657582
DGRP_310	0.310432	0.019668	0.0430147	0.00129375
DGRP_313	0.0566717	0.0122645	0.424013	0.00926692
DGRP_315	0.120962	0.0152395	0.364878	0.00785415
DGRP_318	0.232247	0.0213303	0.211249	0.00645196
DGRP_320	0.475002	0.0138515	0.0551811	0.000881206
DGRP_321	0.08767	0.0176992	0.38479	0.00955623
DGRP_332	0.193714	0.0126921	0.220193	0.0063599
DGRP_335	0.54402	0.018841	0.0304747	0.000550991
DGRP_336	0.4505	0.0198627	0.136187	0.00231886
DGRP_370	0.315569	0.0221842	0.138406	0.00237545
DGRP_371	0.184135	0.0165546	0.262545	0.00785586
DGRP_373	0.511129	0.0178305	0.0658519	0.000721676
DGRP_374	0.436555	0.0244129	0.0514631	0.0011312
DGRP_375	0.213846	0.0161414	0.138621	0.00402411
DGRP_377	0.188338	0.0216569	0.339352	0.010775
DGRP_379	0.560683	0.0230731	0.025906	0.000736076
DGRP_380	0.306255	0.0210457	0.221678	0.00242681
DGRP_381	0.370043	0.0190477	0.109888	0.00164919
DGRP_382	0.438029	0.0153401	0.0801242	0.00127115
DGRP_383	0.157681	0.01729	0.341967	0.0090302
DGRP_385	0.346421	0.0205543	0.151369	0.00421248
DGRP_386	0.0705426	0.0106962	0.439258	0.0119042
DGRP_391	0.482398	0.0154485	0.0494496	0.000723462
DGRP_392	0.364057	0.0215375	0.126911	0.00358183
DGRP_399	0.245984	0.0258121	0.173167	0.00713359
DGRP_405	0.247305	0.0195963	0.223414	0.00489889
DGRP_406	0.139887	0.0126366	0.36075	0.00806063
DGRP_409	0.462955	0.0306106	0.0774911	0.00192577
DGRP_426	0.427546	0.0278346	0.121515	0.00322795
DGRP_427	0.363289	0.0170208	0.0641261	0.00129716
DGRP_437	0.494888	0.0210595	0.0709469	0.00122623
DGRP_439	0.441167	0.0167154	0.100714	0.00116061
DGRP_441	0.406048	0.0256794	0.0657044	0.00192861
DGRP_443	0.391316	0.0188056	0.113004	0.00321003
DGRP_486	0.449239	0.0313074	0.0532332	0.00173529
DGRP_491	0.364943	0.0272182	0.151135	0.00387923
DGRP_502	0.268947	0.0200239	0.21881	0.00638236
DGRP_508	0.328889	0.0202691	0.121813	0.00341168
DGRP_517	0.307879	0.0239349	0.203508	0.00584403
DGRP_530	0.446714	0.0129738	0.0398534	0.000825525
DGRP_531	0.305326	0.0125034	0.171127	0.00363446
DGRP_535	0.365773	0.0249513	0.0960475	0.00196071
DGRP_563	0.253952	0.0200096	0.152184	0.0039705
DGRP_584	0.260638	0.0237619	0.177137	0.00503903
DGRP_589	0.317522	0.0219877	0.115322	0.00284365
DGRP_595	0.3422	0.0289179	0.165224	0.00375344
DGRP_639	0.319491	0.0243652	0.118186	0.00309291
DGRP_642	0.307341	0.0244192	0.120842	0.00281148
DGRP_703	0.230989	0.0212282	0.180685	0.00751042
DGRP_705	0.334945	0.0275627	0.15269	0.00217383
DGRP_707	0.416641	0.0227381	0.0353894	0.001435
DGRP_712	0.465152	0.0137271	0.0475295	0.00120113
DGRP_714	0.339841	0.0236446	0.125138	0.00318587
DGRP_716	0.473863	0.0169249	0.0275289	0.000656987
DGRP_721	0.473317	0.0206246	0.0607833	0.00114696
DGRP_727	0.527184	0.0172333	0.0440544	0.00077048
DGRP_730	0.275663	0.0178356	0.167274	0.00214732
DGRP_737	0.398442	0.0168819	0.0594381	0.000897404
DGRP_738	0.205161	0.0186737	0.311711	0.0109695
DGRP_748	0.122926	0.0123676	0.304406	0.0124123
DGRP_761	0.486192	0.0293726	0.0989172	0.00270216
DGRP_765	0.284749	0.0254757	0.111596	0.00162316
DGRP_774	0.364673	0.026429	0.117482	0.0015758
DGRP_783	0.38769	0.0302643	0.100117	0.00292937
DGRP_787	0.382414	0.0190132	0.0637574	0.00110599
DGRP_790	0.173598	0.0110333	0.0364445	0.00108934
DGRP_796	0.164101	0.0148987	0.0550984	0.00130396
DGRP_799	0.318301	0.0217369	0.0730911	0.00227226
DGRP_801	0.385124	0.0230676	0.0834937	0.00172475
DGRP_804	0.353107	0.0207949	0.0486558	0.00128718
DGRP_805	0.419982	0.0190759	0.0625032	0.00131932
DGRP_808	0.242239	0.0124751	0.0420846	0.00107731
DGRP_810	0.236656	0.0176031	0.217104	0.00549577
DGRP_812	0.20028	0.0135512	0.227463	0.00829367
DGRP_818	0.430846	0.0156878	0.0416698	0.000788883
DGRP_819	0.269326	0.014373	0.11028	0.00364905
DGRP_820	0.411559	0.0251934	0.0557048	0.00111384
DGRP_821	0.485822	0.0177152	0.0630962	0.00140794
DGRP_822	0.28732	0.0212251	0.0857276	0.00224023
DGRP_832	0.524357	0.0170005	0.0277795	0.000407272
DGRP_837	0.317825	0.0215483	0.170885	0.00793225
DGRP_843	0.345379	0.0245797	0.108762	0.00256339
DGRP_849	0.345089	0.0248131	0.125388	0.00367826
DGRP_850	0.526111	0.0192842	0.0491234	0.000749455
DGRP_852	0.265813	0.0192536	0.155663	0.00229515
DGRP_853	0.40375	0.022446	0.112245	0.00186844
DGRP_855	0.226462	0.0171108	0.177645	0.00417583
DGRP_861	0.288432	0.0184514	0.141458	0.00343802
DGRP_Z53	0.0774125	0.0163129	0.276952	0.016361
DGRP_Z53	0.0925999	0.0188979	0.285909	0.0158736
DGRP_Z53	0.0884569	0.0181662	0.287542	0.0142534
DGRP_Z53	0.0849624	0.0158759	0.299509	0.0167672
DGRP_Z53	0.0996365	0.0190544	0.292808	0.0160595
DGRP_Z30	0.170021	0.109492	0.0854746	0.0108293
DGRP_Z30	0.154592	0.100743	0.0891736	0.010948
DGRP_Z30	0.199309	0.0493489	0.0969319	0.00511888
DGRP_Z30	0.191687	0.0637816	0.112603	0.0088833
DGRP_Z30	0.191047	0.0807374	0.0939817	0.00845746
