# Supplementary material for: Genetic architecture of natural variation in cuticular hydrocarbon composition in Drosophila melanogaster
Source: eLife. 2015 Nov 14;4:e09861. doi: 10.7554/eLife.09861 (PMC4749392; doi:10.7554/eLife.09861)
Supplement: Supplementary file 2. — (A) Females. (B) Males. df: degrees of freedom; SS: Sums of squares (Type III); MS: Mean squares; F: F ratio test statistic; P: P-value; σ2: variance component; H2: broad sense heritability. DOI: http://dx.doi.org/10.7554/eLife.09861.041 [file elife-09861-supp2.xlsx]

## Sheet: A
Peak number	Compound(s)	Source	df	SS	MS	F	P	σ2	H2
1	heneicosane	Line	168	0.000982604	5.84883e-06	55.5886	7.20257e-202	1.71739e-06	0.942276
		Error	389	4.09292e-05	1.05216e-07			1.05208e-07
4	docosane	Line	168	0.00496629	2.95613e-05	20.53	1.12272e-125	8.20304e-06	0.85076
		Error	389	0.000560124	1.43991e-06			1.43897e-06
5	7,11-tricosadiene	Line	168	0.00220115	1.31021e-05	21.3076	2.26917e-128	3.83069e-06	0.861682
		Error	389	0.000239198	6.14904e-07			6.14905e-07
6	2-methyldocosane	Line	168	0.000330965	1.97003e-06	17.5961	1.14917e-114	5.74366e-07	0.83683
		Error	389	4.35518e-05	1.11958e-07			1.11993e-07
8	9-tricosene	Line	168	0.00158736	9.44859e-06	31.0278	2.30289e-156	2.94166e-06	0.906145
		Error	389	0.000118458	3.0452e-07			3.04686e-07
9	7-tricosene	Line	168	0.0259144	0.000154252	83.5109	1.25259e-234	4.976e-05	0.964201
		Error	389	0.000718519	1.84709e-06			1.84769e-06
10	6-tricosene	Line	168	0.000650649	3.87291e-06	43.4137	2.49476e-182	1.04934e-06	0.921693
		Error	389	3.47025e-05	8.92094e-08			8.91516e-08
11	5-tricosene	Line	168	0.0013614	8.10355e-06	15.0622	7.31086e-104	1.72823e-06	0.764145
		Error	389	0.000209284	5.38005e-07			5.33422e-07
12	x-tricosene	Line	168	5.08227e-05	3.02516e-07	4.34526	5.08597e-33	6.64021e-08	0.48973
		Error	389	2.70821e-05	6.96198e-08			6.9187e-08
13	tricosane	Line	168	0.424828	0.00252874	62.7648	1.42189e-211	0.0007343	0.947993
		Error	389	0.0156725	4.02891e-05			4.029e-05
14	11- & 9-methyltricosane	Line	168	8.85822e-05	5.27275e-07	18.6324	1.0171e-118	1.55605e-07	0.84601
		Error	389	1.10083e-05	2.82989e-08			2.83231e-08
15	7,11-tetracosadiene	Line	168	8.90609e-05	5.30125e-07	18.9494	6.37787e-120	1.5063e-07	0.843359
		Error	389	1.08826e-05	2.79757e-08			2.79773e-08
16	x,y-tetracosadiene	Line	168	3.26464e-05	1.94324e-07	25.7796	2.11605e-142	5.98943e-08	0.888172
		Error	389	2.93224e-06	7.53788e-09			7.54116e-09
17	3-methyltricosane & 9-tetracosene	Line	168	6.98803e-05	4.15954e-07	10.9781	5.77431e-83	1.12589e-07	0.748161
		Error	389	1.4739e-05	3.78894e-08			3.78988e-08
19	6-tetracosene	Line	168	0.000721793	4.29639e-06	32.4028	1.1341e-159	1.2862e-06	0.906507
		Error	389	5.15788e-05	1.32593e-07			1.32653e-07
20	NI	Line	168	8.50674e-05	5.06353e-07	17.3095	1.64552e-113	1.56378e-07	0.842184
		Error	389	1.13794e-05	2.9253e-08			2.93036e-08
21	5-tetracosene	Line	168	0.000131417	7.82243e-07	48.7784	1.68705e-191	2.51813e-07	0.940087
		Error	389	6.23826e-06	1.60367e-08			1.60484e-08
22	tetracosane	Line	168	0.00893612	5.31912e-05	20.2998	7.32134e-125	1.468e-05	0.848604
		Error	389	0.00101929	2.62028e-06			2.61815e-06
23	9,13-pentacosadiene	Line	168	0.00241372	1.43674e-05	29.579	9.84242e-153	4.2182e-06	0.896734
		Error	389	0.000188949	4.8573e-07			4.85761e-07
24	7,11-pentacosadiene	Line	168	0.238611	0.0014203	122.226	9.04325e-266	0.0004563	0.975163
		Error	389	0.00452031	1.16203e-05			1.162e-05
25	2-methyltetracosane	Line	168	0.0253653	0.000150984	27.2477	1.5226e-146	4.613e-05	0.892728
		Error	389	0.00215551	5.54115e-06			5.54353e-06
26	6,10-pentacosadiene	Line	168	0.000941304	5.603e-06	12.7074	1.9513e-92	1.61807e-06	0.785574
		Error	389	0.000171519	4.40924e-07			4.41657e-07
27	5,9-pentacosadiene & 9-pentacosene	Line	168	0.155575	0.000926044	17.2789	2.18981e-113	0.000208	0.796067
		Error	389	0.020848	5.35939e-05			5.33e-05
28	8-pentacosene	Line	168	0.00235715	1.40307e-05	26.414	3.23853e-144	4.01377e-06	0.883131
		Error	389	0.00020663	5.31182e-07			5.3116e-07
29	7-pentacosene	Line	168	0.125238	0.000745466	98.5261	4.23456e-248	0.0002437	0.969877
		Error	389	0.00294324	7.56617e-06			7.56836e-06
30	6-pentacosene	Line	168	0.000194009	1.15482e-06	1.95407	4.80355e-08	1.67464e-07	0.223718
		Error	389	0.000229892	5.90982e-07			5.81087e-07
31	5-pentacosene	Line	168	0.0293053	0.000174436	85.126	3.47834e-236	3.62e-05	0.946551
		Error	389	0.000797121	2.04915e-06			2.04427e-06
32	pentacosane	Line	168	0.351461	0.00209203	37.3676	1.2118e-170	0.0005924	0.913677
		Error	389	0.0217782	5.59852e-05			5.597e-05
33	NI	Line	168	1.4643e-05	8.71605e-08	9.06821	3.74283e-71	2.47312e-08	0.719536
		Error	389	3.73893e-06	9.61165e-09			9.63983e-09
34	NI	Line	168	2.29599e-05	1.36666e-07	23.4588	2.07722e-135	4.0997e-08	0.875516
		Error	389	2.26623e-06	5.82578e-09			5.82912e-09
35	13- & 11-methylpentacosane	Line	168	5.41221e-05	3.22155e-07	31.5749	1.07308e-157	1.0085e-07	0.908075
		Error	389	3.96892e-06	1.02029e-08			1.02091e-08
36	5-methylpentacosane	Line	168	4.20861e-05	2.50513e-07	28.4117	1.08574e-149	7.72159e-08	0.897446
		Error	389	3.4299e-06	8.81723e-09			8.82374e-09
37	8,12-hexacosadiene	Line	168	0.000188818	1.12392e-06	25.9313	7.72909e-143	3.27281e-07	0.883031
		Error	389	1.68601e-05	4.33421e-08			4.33529e-08
38	7,11-hexacosadiene	Line	168	0.00169214	1.00723e-05	15.0693	6.78528e-104	2.73738e-06	0.803825
		Error	389	0.000260006	6.68395e-07			6.68063e-07
39	2-methylpentacosane	Line	168	0.000593436	3.53236e-06	6.34966	4.32664e-51	9.19405e-07	0.622607
		Error	389	0.000216403	5.56306e-07			5.57296e-07
40	6,10-hexacosadiene	Line	168	0.00120814	7.19132e-06	19.0384	2.95191e-120	1.79719e-06	0.826703
		Error	389	0.000146935	3.77726e-07			3.76736e-07
41	9-hexacosene & 3-methylpentacosane	Line	168	0.00159191	9.47564e-06	31.1522	1.1417e-156	2.13062e-06	0.875493
		Error	389	0.000118323	3.04172e-07			3.03003e-07
42	7-hexacosene	Line	168	0.000304798	1.81428e-06	5.81785	1.32955e-46	4.40498e-07	0.585962
		Error	389	0.000121308	3.11847e-07			3.11253e-07
43	6-hexacosene + impurity	Line	168	0.000543736	3.23653e-06	1.02605	0.415116	5.06085e-08	0.0159479
		Error	389	0.00122704	3.15435e-06			3.12274e-06
44	hexacosane	Line	168	0.0137658	8.19395e-05	28.0875	7.95499e-149	2.235e-05	0.884644
		Error	389	0.00113483	2.9173e-06			2.915e-06
45	9,13-heptacosadiene	Line	168	0.00220215	1.3108e-05	23.4984	1.56014e-135	3.7966e-06	0.87188
		Error	389	0.000216994	5.57825e-07			5.57897e-07
46	7,11-heptacosadiene & 2-methylhexacosane	Line	168	2.47298	0.0147201	25.8734	1.13449e-142	0.0039039	0.872956
		Error	389	0.221313	0.000568929			0.0005681
47	5,9-heptacosadiene & 9-heptacosene	Line	168	2.70008	0.0160719	64.6682	5.69237e-214	0.0033569	0.931245
		Error	389	0.0966775	0.000248528			0.0002478
48	7-heptacosene	Line	168	0.142474	0.000848061	23.9792	4.99992e-137	0.0002475	0.874971
		Error	389	0.0137576	3.53666e-05			3.537e-05
49	5-heptacosene	Line	168	0.0382804	0.000227859	72.3326	5.44193e-223	4.625e-05	0.936418
		Error	389	0.00122541	3.15016e-06			3.14037e-06
50	heptacosane	Line	168	0.350334	0.00208532	11.093	1.25606e-83	0.0005567	0.747529
		Error	389	0.073126	0.000187984			0.000188
51	8,12-octacosadiene	Line	168	0.00179456	1.06819e-05	20.7727	1.58471e-126	2.82945e-06	0.846362
		Error	389	0.000200034	5.14226e-07			5.13622e-07
52	7,11-octacosadiene & 2-methylheptacosane	Line	168	0.00195151	1.16162e-05	31.9669	1.22797e-158	3.15236e-06	0.896721
		Error	389	0.000141355	3.6338e-07			3.63071e-07
53	6,10-octacosadiene & 9-octacosene & 3-methylheptacosane	Line	168	0.00347212	2.06674e-05	15.1644	2.51587e-104	4.7385e-06	0.777606
		Error	389	0.000530163	1.36289e-06			1.3552e-06
54	NI	Line	168	0.00166307	9.89925e-06	3.4272	1.14578e-23	2.08556e-06	0.419912
		Error	389	0.0011236	2.88844e-06			2.88111e-06
55	octacosane	Line	168	0.00389044	2.31574e-05	13.8962	2.15162e-98	5.10679e-06	0.755092
		Error	389	0.000648251	1.66645e-06			1.65635e-06
56	9,13-nonacosadiene	Line	168	0.0118907	7.0778e-05	1.01432	0.449804	3.99469e-06	0.0571896
		Error	389	0.027144	6.97789e-05			6.586e-05
57	2-methyloctacosane & 7,11-nonacosadiene	Line	168	2.0196	0.0120214	19.2988	3.15468e-121	0.0033818	0.84448
		Error	389	0.242312	0.000622911			0.0006228
58	9-nonacosene	Line	168	0.00953091	5.67316e-05	6.126	3.14771e-49	1.213e-05	0.570216
		Error	389	0.00360245	9.26079e-06			9.14347e-06
59	7-nonacosene	Line	168	0.00448916	2.67212e-05	2.22634	7.67839e-11	4.44077e-06	0.270555
		Error	389	0.00466889	1.20023e-05			1.197e-05
60	nonacosane	Line	168	0.0444026	0.000264301	2.36014	2.96228e-12	4.417e-05	0.285297
		Error	389	0.0435622	0.000111985			0.0001107
61	8,12-triacontadiene & 2-methylnonacosane	Line	168	0.000249537	1.48534e-06	8.16115	6.12672e-65	3.61901e-07	0.666323
		Error	389	7.07983e-05	1.82001e-07			1.81231e-07
62	2-methyltriacontane	Line	168	0.0384242	0.000228715	25.0289	3.34882e-140	4.577e-05	0.834399
		Error	389	0.0035547	9.13805e-06			9.08336e-06
63	7,11-hentriacontadiene	Line	168	0.00436811	2.60007e-05	22.7809	2.97357e-133	6.89924e-06	0.858239
		Error	389	0.00044398	1.14134e-06			1.1396e-06
64	hentriacontane	Line	168	0.000483065	2.87539e-06	4.51516	1.11858e-34	5.93657e-07	0.485432
		Error	389	0.000247727	6.3683e-07			6.29289e-07

## Sheet: B
Peak number	Compound(s)	Source	df	SS	MS	F	P	σ2	H2
1	heneicosane	Line	156	0.0356343	0.000228425	74.6067	2.131e-210	6.754e-05	0.956635
		Error	363	0.0011114	3.06172e-06			3.0616e-06
2	x-docosene	Line	156	0.000524412	3.36162e-06	9.22169	2.26602e-67	9.25564e-07	0.717301
		Error	363	0.000132326	3.64534e-07			3.64778e-07
3	x-docosene	Line	156	0.000130856	8.38821e-07	15.8257	4.19514e-100	2.30686e-07	0.813271
		Error	363	1.92403e-05	5.30036e-08			5.29661e-08
4	docosane	Line	156	0.0380719	0.00024405	27.3322	5.84797e-137	6.963e-05	0.886355
		Error	363	0.00324125	8.92906e-06			8.9271e-06
6	2-methyldocosane	Line	156	0.000506986	3.24991e-06	22.5566	1.14339e-123	9.57622e-07	0.869208
		Error	363	5.23003e-05	1.44078e-07			1.44095e-07
7	NI	Line	156	0.000119205	7.64136e-07	9.64466	6.52334e-70	1.7856e-07	0.69382
		Error	363	2.87601e-05	7.9229e-08			7.87978e-08
8	9-tricosene	Line	156	0.0386249	0.000247596	19.361	2.41951e-113	7.358e-05	0.851866
		Error	363	0.00464218	1.27884e-05			1.28e-05
9	7-tricosene	Line	156	5.56645	0.0356824	47.1522	3.47339e-176	0.01085	0.934771
		Error	363	0.2747	0.000756749			0.0007569
10	6-tricosene	Line	156	0.00056398	3.61526e-06	5.46135	1.25975e-40	9.36859e-07	0.585214
		Error	363	0.000240296	6.61972e-07			6.64024e-07
11	5-tricosene	Line	156	0.0280636	0.000179895	15.6179	2.97868e-99	5.189e-05	0.818281
		Error	363	0.00418122	1.15185e-05			1.152e-05
13	tricosane	Line	156	0.872161	0.00559077	49.9991	1.66031e-180	0.0016124	0.935157
		Error	363	0.0405897	0.000111817			0.0001118
16	x,y-tetracosadiene	Line	156	9.06187e-05	5.80889e-07	17.8105	8.34904e-108	1.67497e-07	0.836995
		Error	363	1.18392e-05	3.2615e-08			3.26201e-08
17	3-methyltricosane	Line	156	0.000180876	1.15946e-06	8.15417	1.37003e-60	3.13174e-07	0.687675
		Error	363	5.16159e-05	1.42193e-07			1.42236e-07
18	7-tetracosene	Line	156	0.00832205	5.33465e-05	18.0258	1.34723e-108	1.557e-05	0.840264
		Error	363	0.00107428	2.95946e-06			2.96065e-06
19	6-tetracosene	Line	156	0.0014116	9.04871e-06	29.7778	5.4475e-143	2.49919e-06	0.891646
		Error	363	0.000110306	3.03874e-07			3.03705e-07
21	5-tetracosene	Line	156	0.00176763	1.1331e-05	14.8225	6.56681e-96	2.8963e-06	0.791534
		Error	363	0.000277494	7.64445e-07			7.62796e-07
22	tetracosane	Line	156	0.00449007	2.87825e-05	20.0324	1.25975e-115	8.35669e-06	0.853261
		Error	363	0.000521558	1.4368e-06			1.43713e-06
25	2-methyltetracosane	Line	156	0.0992442	0.000636181	18.903	9.5475e-112	0.0001878	0.847954
		Error	363	0.0122168	3.3655e-05			3.367e-05
26	6,10-pentacosadiene	Line	156	0.00591606	3.79235e-05	26.5575	5.98601e-135	1.125e-05	0.887283
		Error	363	0.000518355	1.42797e-06			1.42857e-06
27	9-pentacosene	Line	156	0.0885189	0.000567429	53.4354	2.00349e-185	0.0001511	0.934365
		Error	363	0.00385469	1.0619e-05			1.061e-05
29	7-pentacosene	Line	156	3.95087	0.0253261	112.173	2.10994e-241	0.0076016	0.971155
		Error	363	0.0819573	0.000225778			0.0002258
31	5-pentacosene	Line	156	0.00493414	3.16291e-05	88.6494	1.87477e-223	9.77927e-06	0.964796
		Error	363	0.000129514	3.56789e-07			3.56828e-07
32	pentacosane	Line	156	0.0996134	0.000638548	58.8653	1.27514e-192	0.0001732	0.941084
		Error	363	0.00393768	1.08476e-05			1.084e-05
39	2-methylpentacosane	Line	156	0.000147997	9.487e-07	13.615	1.49594e-90	2.70356e-07	0.794981
		Error	363	2.5294e-05	6.96803e-08			6.97225e-08
41	3-methylpentacosane	Line	156	0.000550584	3.52939e-06	16.7983	5.70794e-104	1.04121e-06	0.832009
		Error	363	7.62679e-05	2.10104e-07			2.10231e-07
42	7-hexacosene	Line	156	0.000161443	1.03489e-06	56.0199	6.23163e-189	3.21751e-07	0.94569
		Error	363	6.70595e-06	1.84737e-08			1.84779e-08
43	6-hexacosene + impurity	Line	156	3.03741e-05	1.94706e-07	3.8231	5.36249e-26	4.21124e-08	0.45333
		Error	363	1.84872e-05	5.09288e-08			5.07833e-08
44	hexacosane	Line	156	0.00225884	1.44797e-05	25.9848	1.9808e-133	3.83827e-06	0.873346
		Error	363	0.000202277	5.57238e-07			5.56634e-07
46	2-methylhexacosane	Line	156	0.209585	0.00134349	14.2159	2.91176e-93	0.0003971	0.807578
		Error	363	0.0343058	9.45063e-05			9.461e-05
47	9-heptacosene	Line	156	0.000635002	4.07052e-06	5.98589	6.94379e-45	1.07005e-06	0.610822
		Error	363	0.000246847	6.8002e-07			6.81765e-07
48	7-heptacosene	Line	156	0.0054013	3.46237e-05	12.3213	2.19313e-84	9.38814e-06	0.769715
		Error	363	0.00102005	2.81006e-06			2.80877e-06
50	heptacosane	Line	156	0.0704804	0.000451797	26.4079	1.48414e-134	0.0001207	0.875981
		Error	363	0.00621036	1.71084e-05			1.709e-05
52	2-methylheptacosane	Line	156	0.00020957	1.3434e-06	46.954	7.08879e-176	3.06964e-07	0.914905
		Error	363	1.03858e-05	2.8611e-08			2.85508e-08
54	NI	Line	156	0.000974241	6.24513e-06	5.90203	3.23056e-44	1.63881e-06	0.607017
		Error	363	0.000384102	1.05813e-06			1.06096e-06
55	octacosane	Line	156	0.0013448	8.62051e-06	17.534	8.93636e-107	1.86335e-06	0.792314
		Error	363	0.000178468	4.91647e-07			4.88433e-07
57	2-methyloctacosane	Line	156	0.246629	0.00158095	33.5045	2.23209e-151	0.0004003	0.894694
		Error	363	0.0171287	4.71864e-05			4.712e-05
58	9-nonacosene	Line	156	0.00107689	6.90316e-06	1.15168	0.142425	0	0
		Error	363	0.00217582	5.99399e-06			6.25522e-06
59	7-nonacosene	Line	156	5.11883e-05	3.2813e-07	11.056	7.30867e-78	8.20948e-08	0.734989
		Error	363	1.07734e-05	2.96789e-08			2.96005e-08
60	nonacosane	Line	156	0.020092	0.000128795	15.7154	1.18375e-99	2.725e-05	0.770208
		Error	363	0.00297494	8.19543e-06			8.13065e-06
61	2-methylnonacosane	Line	156	0.00159195	1.02048e-05	14.8692	4.14179e-96	2.95775e-06	0.811569
		Error	363	0.00024913	6.86308e-07			6.86737e-07
62	2-methyltriacontane	Line	156	0.116782	0.000748605	38.0958	1.2768e-160	0.0001331	0.872195
		Error	363	0.00713316	1.96506e-05			1.95e-05
64	hentriacontane	Line	156	0.000776673	4.97867e-06	8.19333	7.5508e-61	8.43106e-07	0.588885
		Error	363	0.000220577	6.0765e-07			5.88594e-07
