# Supplementary material for: Genetic architecture of natural variation in cuticular hydrocarbon composition in Drosophila melanogaster
Source: eLife. 2015 Nov 14;4:e09861. doi: 10.7554/eLife.09861 (PMC4749392; doi:10.7554/eLife.09861)
Supplement: Supplementary file 4. — (A) Females. (B) Males. DOI: http://dx.doi.org/10.7554/eLife.09861.043 [file elife-09861-supp4.xlsx]

## Sheet: A
Peak Number	Compound	Module	Average Degree	Degree
37	8,12-C26:2	1	0.80733	0.85044
15	7,11-C24:2	1	0.80733	0.84116
23	9,13-C25:2	1	0.80733	0.80454
38	7,11-C26:2	1	0.80733	0.73317
24	7,11-C25:2	2	0.76089	0.82677
5	7,11-C23:2	2	0.76089	0.77933
26	6,10-C25:2	2	0.76089	0.77008
10	6-C23:1	2	0.76089	0.71793
47	5,9-C27:2 & 9-C27:1	2	0.76089	0.71033
13	n-C23	3	0.66366	0.77533
4	n-C22	3	0.66366	0.74178
1	n-C21	3	0.66366	0.73591
22	n-C24	3	0.66366	0.59499
53	6,10-C28:2 & 9-C28:1 & 3-Me-C27	3	0.66366	0.47028
28	8-C25:1	4	0.61871	0.67612
45	9,13-C27:2	4	0.61871	0.63624
20	NI	4	0.61871	0.54378
21	5-C24:1	5	0.61147	0.70124
9	7-C23:1	5	0.61147	0.68501
27	5,9-C25:2 & 9-C25:1	5	0.61147	0.68197
17	3-Me-C23 & 9-C24:1	5	0.61147	0.64818
19	6-C24:1	5	0.61147	0.64765
8	9-C23:1	5	0.61147	0.64175
29	7-C25:1	5	0.61147	0.62591
11	5-C23:1	5	0.61147	0.52377
31	5-C25:1	5	0.61147	0.3478
36	5-Me-C25	6	0.57446	0.68603
35	13- &11-Me-C25	6	0.57446	0.67145
14	11- & 9-Me-C23	6	0.57446	0.56976
33	NI	6	0.57446	0.53793
54	NI	6	0.57446	0.5225
41	3-Me-C25 & 9-C26:1	6	0.57446	0.5179
34	NI	6	0.57446	0.51567
60	n-C29	7	0.44988	0.58543
57	2-Me-C28 & 7,11-C29:2	7	0.44988	0.57323
59	7-C29:1	7	0.44988	0.55274
63	7,11-C31:2	7	0.44988	0.5347
61	8,12-C30:2 & 2-Me-C29	7	0.44988	0.49762
55	n-C28	7	0.44988	0.49126
52	7,11-C28:2 & 2-Me-C27	7	0.44988	0.48728
58	9-C29:1 & 5,9-C29:2	7	0.44988	0.48165
64	n-C31	7	0.44988	0.47593
40	6,10-C26:2	7	0.44988	0.42803
48	7-C27:1	7	0.44988	0.25193
62	2-Me-C30	7	0.44988	0.24756
51	8,12-C28:2	7	0.44988	0.24113
16	x,y-C24:2	8	0.41296	0.50826
50	n-C27	8	0.41296	0.49955
46	7,11-C27:2 & 2-Me-C26	8	0.41296	0.48078
44	n-C26	8	0.41296	0.45448
25	2-Me-C24	8	0.41296	0.45045
6	2-Me-C22	8	0.41296	0.44089
49	5-C27:1	8	0.41296	0.3897
42	7-C26:1	8	0.41296	0.29876
32	n-C25	8	0.41296	0.1938
39	2-Me-C25	9	0	0
12	x-C23:1	10	0	0

## Sheet: B
Peak Number	Compound	Module	Average Degree	Degree
50	n-C27	1	0.84325	0.8804
55	n-C28	1	0.84325	0.87896
60	n-C29	1	0.84325	0.8222
44	n-C26	1	0.84325	0.79145
16	x,y-C24:2	2	0.81381	0.84354
25	2-Me-C24	2	0.81381	0.83375
6	2-Me-C22	2	0.81381	0.76414
57	2-Me-C28	3	0.77409	0.84708
52	2-Me-C27	3	0.77409	0.76696
62	2-Me-C30	3	0.77409	0.70821
22	n-C24	4	0.75926	0.75926
32	n-C25	4	0.75926	0.75926
29	7-C25:1	5	0.5958	0.73217
31	5-C25:1	5	0.5958	0.71681
3	x-C22:1	5	0.5958	0.69363
19	6-C24:1	5	0.5958	0.63871
9	7-C23:1	5	0.5958	0.61596
2	x-C22:1	5	0.5958	0.56196
7	NI	5	0.5958	0.472
21	5-C24:1	5	0.5958	0.33516
41	3-Me-C25	6	0.56016	0.67299
17	3-Me-C23	6	0.56016	0.53893
54	NI	6	0.56016	0.46855
48	7-C27:1	7	0.51927	0.66525
47	9-C27:1	7	0.51927	0.63829
42	7-C26:1	7	0.51927	0.62291
43	6-C26:1 & i	7	0.51927	0.57981
59	7-C29:1	7	0.51927	0.35634
26	6,10-C25:2	7	0.51927	0.25305
1	n-C21	8	0.44567	0.60833
4	n-C22	8	0.44567	0.53866
27	9-C25:1	8	0.44567	0.4689
13	n-C23	8	0.44567	0.35196
8	9-C23:1	8	0.44567	0.26049
46	2-Me-C26	9	0.38408	0.54479
39	2-Me-C25	9	0.38408	0.48872
18	7-C24:1	9	0.38408	0.31318
11	5-C23:1	9	0.38408	0.18964
10	6-C23:1	10	0.24888	0.24888
61	2-Me-C29	10	0.24888	0.24888
64	n-C31	11	0	0
