# Supplementary material for: Genetic architecture of natural variation in cuticular hydrocarbon composition in Drosophila melanogaster
Source: eLife. 2015 Nov 14;4:e09861. doi: 10.7554/eLife.09861 (PMC4749392; doi:10.7554/eLife.09861)
Supplement: Supplementary file 7. — Results are given for female PC 1 - 7 and male PC 1 - 5. P-values (≤ 10-5) of association tests are given for a linear mixed model accounting for relatedness of adjusted line mean PCs versus genotypes. DOI: http://dx.doi.org/10.7554/eLife.09861.046 [file elife-09861-supp7.xlsx]

## Sheet: F PC 1
Chromosomal Position	Minor Allele	Major Allele	Reference Allele	Minor Allele Frequency	Minor Allele Count	Major Allele Count	Effect Size	P-value	Flybase ID Gene1	Gene Symbol 1	Gene 1 Site Class	Flybase ID Gene 2	Gene Symbol 2	Gene 2 Site Class	Flybase ID Gene 3	Gene Symbol 3	Gene 3 Site Class	Flybase ID Gene 4	Gene Symbol 4	Gene 4 Site Class
3R_13648050_SNP	T	A	A	0.075	12	148	0.04925	1.56365e-07	FBgn0261649	tinc	INTRON
3R_9900597_SNP	C	A	A	0.1159	19	145	0.04009	1.84842e-07	FBgn0038197	foxo	INTRON
3R_25818359_SNP	C	A	A	0.06627	11	155	0.05138	2.68291e-07	FBgn0000032	Acph-1	MISSENSE	FBgn0039730	CG7903	838 bp DOWNSTREAM
3R_26599079_SNP	G	C	C	0.05455	9	156	0.05286	1.01112e-06	FBgn0004606	zfh1	INTRON
3R_26599082_INS	TCAA	T	T	0.05455	9	156	0.05286	1.01112e-06	FBgn0004606	zfh1	INTRON
3R_26599087_INS	TCA	T	T	0.05455	9	156	0.05286	1.01112e-06	FBgn0004606	zfh1	INTRON
3R_25819346_SNP	A	T	T	0.06024	10	156	0.0526	1.20107e-06	FBgn0039730	CG7903	UTR_3_PRIME	FBgn0000032	Acph-1	213 bp UPSTREAM
3R_17316731_SNP	T	A	A	0.05988	10	157	0.04968	1.34311e-06	INTERGENIC
2L_9982629_SNP	T	G	T	0.1879	31	134	0.02912	1.37279e-06	INTERGENIC
2L_10704053_SNP	A	G	G	0.06748	11	152	0.04812	1.45458e-06	FBgn0024740	Lip2	INTRON	FBgn0032287	CG6415	SYNONYMOUS_CODING
3R_25821087_SNP	C	T	T	0.06587	11	156	0.04961	1.70085e-06	FBgn0039731	sas-6	UTR_5_PRIME	FBgn0039730	CG7903	134 bp UPSTREAM
2R_18204852_DEL	T	TT	TT	0.08025	13	149	0.04404	1.78157e-06	FBgn0013272	Gp150	314 bp UPSTREAM
3R_25831530_SNP	T	C	C	0.05988	10	157	0.05237	1.92031e-06	FBgn0016685	Nlp	INTRON	FBgn0039736	CG7912	226 bp DOWNSTREAM	FBgn0039735	CG7911	947 bp UPSTREAM
3R_25818024_SNP	G	A	A	0.103	17	148	0.03992	2.26402e-06	FBgn0000032	Acph-1	SYNONYMOUS_CODING
2R_12609718_SNP	C	T	T	0.1	16	144	0.03806	2.39598e-06	FBgn0050463	CG30463	INTRON
3R_7924718_DEL	T	TGGCTT	TGGCTT	0.2129	33	122	0.02965	2.47933e-06	FBgn0051361	dpr17	INTRON
3R_17314582_DEL	T	TTTTAA	TTTTAA	0.05096	8	149	0.05289	2.84497e-06	INTERGENIC
3L_7452459_SNP	T	C	C	0.1076	17	141	0.038	2.86656e-06	FBgn0035785	CG8546	751 bp DOWNSTREAM
3R_18982358_SNP	T	A	T	0.487	75	79	-0.0208	2.96257e-06	FBgn0004395	unk	INTRON
X_6012057_DEL	G	GTTGTGGGG	GTTGTGGGG	0.05479	8	138	0.05292	3.16695e-06	FBgn0264386	Ca-alpha1T	INTRON
3R_10515286_DEL	G	GAAA	GAAA	0.3067	50	113	0.02401	3.31251e-06	FBgn0265140	Meltrin	INTRON
3R_24484998_SNP	T	C	C	0.06667	11	154	0.0479	3.39467e-06	INTERGENIC
3R_9900625_SNP	G	A	A	0.1131	19	149	0.03612	3.43169e-06	FBgn0038197	foxo	INTRON
X_20891586_SNP	A	G	G	0.2925	43	104	0.0266	4.15396e-06	INTERGENIC
2R_19063283_SNP	C	A	C	0.4172	63	88	0.02196	4.27897e-06	FBgn0085400	CG34371	INTRON
2L_14677168_SNP	A	G	G	0.09211	14	138	0.04206	4.77693e-06	FBgn0003016	osp	INTRON
2R_7049962_SNP	C	T	T	0.05952	10	158	0.0473	4.99614e-06	FBgn0033579	CG13229	INTRON	FBgn0003396	shn	INTRON
2L_7448188_SNP	G	A	G	0.1	16	144	0.03753	5.53924e-06	FBgn0025697	santa-maria	INTRON
2L_14677175_SNP	T	C	C	0.09934	15	136	0.04039	5.69348e-06	FBgn0003016	osp	INTRON
3R_25016530_SNP	A	G	G	0.07317	12	152	0.04445	5.72709e-06	FBgn0039647	CG14509	INTRON
2R_11735874_SNP	A	C	C	0.2026	31	122	0.02815	6.06827e-06	FBgn0034046	tun	237 bp UPSTREAM
2R_7048939_SNP	C	A	A	0.05422	9	157	0.04928	6.17745e-06	FBgn0033579	CG13229	INTRON	FBgn0003396	shn	INTRON
3R_17574937_SNP	A	G	G	0.07738	13	155	0.04255	6.48472e-06	FBgn0051343	CG31343	212 bp DOWNSTREAM	FBgn0051233	CG31233	752 bp UPSTREAM
3L_1288372_SNP	C	G	G	0.2025	32	126	0.02846	6.50894e-06	FBgn0052333	CG32333	41 bp DOWNSTREAM
3R_21265064_SNP	G	A	A	0.06627	11	155	0.04369	6.55307e-06	FBgn0004509	Fur1	INTRON
2L_12951597_SNP	A	C	C	0.1677	27	134	0.03044	6.90136e-06	INTERGENIC
2R_12921259_SNP	A	G	A	0.05455	9	156	0.04751	7.52897e-06	FBgn0263033	CG43328	UTR_5_PRIME	FBgn0023172	RhoGEF2	INTRON	FBgn0263032	CG43327	MISSENSE	FBgn0263114	CG43371	330 bp DOWNSTREAM
2R_6923942_SNP	T	A	A	0.1159	19	145	0.03356	7.58102e-06	FBgn0040765	luna	INTRON
3R_18982582_SNP	C	T	T	0.3806	59	96	-0.02147	7.80378e-06	FBgn0004395	unk	INTRON
X_9285037_DEL	T	TT	TT	0.2092	32	121	0.02882	7.88624e-06	FBgn0261260	mgl	INTRON
3R_7924728_SNP	T	G	G	0.2323	36	119	0.02781	8.23734e-06	FBgn0051361	dpr17	INTRON
3R_18982520_SNP	G	A	A	0.4805	74	80	0.02103	8.55038e-06	FBgn0004395	unk	INTRON
2L_11490344_SNP	A	G	G	0.2089	33	125	0.02509	8.69435e-06	INTERGENIC
2R_12924220_SNP	T	A	A	0.05988	10	157	0.0438	9.0003e-06	FBgn0023172	RhoGEF2	INTRON
2L_11930160_SNP	G	A	G	0.08485	14	151	0.03958	9.14309e-06	INTERGENIC
2R_20272734_SNP	A	C	A	0.05952	10	158	0.04583	9.43141e-06	FBgn0000037	mAcR-60C	INTRON
2L_1503746_SNP	A	G	G	0.07453	12	149	0.03963	9.64839e-06	FBgn0264873	CR44064	EXON	FBgn0031344	CG7420	842 bp UPSTREAM

## Sheet: F PC 2
Chromosomal Position	Minor Allele	Major Allele	Reference Allele	Minor Allele Frequency	Minor Allele Count	Major Allele Count	Effect Size	P-value	Flybase ID Gene1	Gene Symbol 1	Gene 1 Site Class	Flybase ID Gene 2	Gene Symbol 2	Gene 2 Site Class
2L_7755519_SNP	T	C	C	0.05488	9	155	-0.04526	1.20087e-06	FBgn0031944	CG7196	INTRON	FBgn0031943	CG14538	798 bp UPSTREAM
3L_8850557_SNP	C	T	T	0.12	18	132	-0.03303	1.33392e-06	FBgn0263930	dally	INTRON
3R_6659878_SNP	C	G	G	0.1463	24	140	0.02854	2.09681e-06	FBgn0261053	Cad86C	INTRON
2R_6407818_SNP	C	A	A	0.1447	23	136	-0.02895	2.43819e-06	FBgn0005630	lola	INTRON
2R_6347038_SNP	C	T	T	0.07273	12	153	-0.03847	2.47347e-06	FBgn0001122	G-oalpha47A	INTRON	FBgn0033524	Cyp49a1	641 bp UPSTREAM
3L_11828922_SNP	T	A	A	0.05988	10	157	-0.04132	3.38128e-06	FBgn0262366	CG43064	MISSENSE
3L_11828932_SNP	A	G	G	0.06548	11	157	-0.03943	3.54463e-06	FBgn0262366	CG43064	SYNONYMOUS_CODING
3L_19367232_SNP	A	C	C	0.05389	9	158	-0.04301	4.21443e-06	FBgn0052206	CG32206	INTRON
2L_7750184_SNP	A	G	G	0.07229	12	154	-0.03749	4.55786e-06	INTERGENIC
X_18982607_DEL	G	TGGGGGGTA	TGGGGGGTA	0.1258	20	139	-0.02983	4.88435e-06	INTERGENIC
2L_9409309_INS	TG	C	C	0.09938	16	145	-0.0328	5.07951e-06	FBgn0085395	Shawl	INTRON
X_18982564_SNP	T	C	C	0.1205	20	146	-0.02964	5.28388e-06	INTERGENIC
2L_9409426_SNP	G	A	A	0.09756	16	148	-0.03264	5.54697e-06	FBgn0085395	Shawl	INTRON
3R_10187315_SNP	T	A	A	0.06962	11	147	-0.03865	5.9568e-06	FBgn0024321	NK7.1	INTRON	FBgn0051320	CG31320	UTR_5_PRIME
X_11578971_SNP	T	A	A	0.1389	20	124	-0.02972	6.29481e-06	FBgn0014133	bif	INTRON
2L_9409339_SNP	A	G	G	0.09375	15	145	-0.03341	6.47441e-06	FBgn0085395	Shawl	INTRON
3R_6659902_DEL	G	GCTCCAG	GCTCCAG	0.1447	22	130	0.02836	6.71252e-06	FBgn0261053	Cad86C	INTRON
2L_4677430_SNP	T	C	C	0.05521	9	154	-0.04217	6.76391e-06	INTERGENIC
X_3422598_SNP	A	T	T	0.3515	58	107	-0.02004	6.8638e-06	FBgn0052791	CG32791	INTRON
2R_14428846_SNP	A	G	G	0.1366	22	139	-0.02814	7.14951e-06	FBgn0085419	Rgk2	INTRON
2R_16145479_SNP	T	A	A	0.07738	13	155	-0.03525	7.91205e-06	FBgn0034491	Hsl	INTRON	FBgn0025720	Ate1	584 bp UPSTREAM
3L_18090947_SNP	T	C	C	0.05422	9	157	-0.04178	8.18995e-06	FBgn0036773	CG13698	INTRON
X_19762289_SNP	T	G	G	0.1585	26	138	-0.02603	8.3911e-06	FBgn0052529	Hers	INTRON
2L_9409362_SNP	A	C	C	0.09146	15	149	-0.03296	8.5333e-06	FBgn0085395	Shawl	INTRON
2L_16388013_INS	G	GG	G	0.3377	51	100	0.0209	8.8368e-06	INTERGENIC
X_18919952_INS	AGGA	A	A	0.09286	13	127	-0.03519	9.90424e-06	FBgn0264090	CG43759	CODON_CHANGE_PLUS_CODON_INSERTION

## Sheet: F PC 3
Chromosomal Position	Minor Allele	Major Allele	Reference Allele	Minor Allele Frequency	Minor Allele Count	Major Allele Count	Effect Size	P-value	Flybase ID Gene1	Gene Symbol 1	Gene 1 Site Class	Flybase ID Gene 2	Gene Symbol 2	Gene 2 Site Class
3L_9985160_SNP	T	C	C	0.2313	37	123	-0.02125	7.76816e-08	FBgn0040823	dpr6	INTRON
3L_4062966_SNP	T	C	C	0.05325	9	160	-0.03693	4.14097e-07	FBgn0000449	dib	INTRON
3L_4063021_SNP	C	T	T	0.05325	9	160	-0.03693	4.14097e-07	FBgn0000449	dib	INTRON
3L_2044248_SNP	T	C	C	0.06587	11	156	-0.03367	4.71746e-07	FBgn0086906	sls	SYNONYMOUS_CODING
3L_11465840_SNP	T	A	A	0.07186	12	155	-0.03096	6.57957e-07	FBgn0028667	Vha16-3	551 bp UPSTREAM
2L_4158374_SNP	G	A	A	0.05161	8	147	-0.03842	9.5701e-07	INTERGENIC
3L_4524577_SNP	C	T	T	0.06707	11	153	-0.03227	1.02823e-06	FBgn0014073	Tie	UTR_5_PRIME
3L_3264983_SNP	G	T	T	0.07947	12	139	-0.03114	1.0673e-06	FBgn0035427	ckd	INTRON
3R_24165640_INS	TT	T	T	0.07407	12	150	-0.03203	1.53291e-06	FBgn0039580	Gfat2	154 bp UPSTREAM	FBgn0039581	Moca-cyp	415 bp UPSTREAM
2L_16610544_SNP	T	C	C	0.05488	9	155	-0.03604	1.58569e-06	FBgn0259735	CG42389	INTRON	FBgn0032590	CG4631	507 bp DOWNSTREAM
3L_15673048_SNP	A	T	T	0.07273	12	153	-0.02981	1.65118e-06	FBgn0036527	CG7304	MISSENSE
2R_867314_SNP	T	A	A	0.05195	8	146	-0.03827	1.99752e-06	FBgn0040849	Ir41a	INTRON
3R_6626699_SNP	T	C	C	0.05696	9	149	-0.03431	2.26102e-06	FBgn0037836	CG14692	SYNONYMOUS_CODING
2R_4070699_SNP	A	T	T	0.2778	40	104	-0.01896	2.38839e-06	FBgn0053087	LRP1	INTRON
3L_9432026_SNP	T	C	C	0.05917	10	159	-0.03338	2.79e-06	FBgn0260859	Bet3	UTR_3_PRIME	FBgn0040305	MTF-1	215 bp DOWNSTREAM
2L_14297555_SNP	T	A	A	0.06173	10	152	-0.03301	2.82227e-06	FBgn0261563	wb	INTRON
3L_1671981_SNP	A	C	C	0.05	8	152	-0.03742	2.93048e-06	FBgn0035256	CG13930	SYNONYMOUS_CODING
2R_4090263_SNP	C	G	G	0.05389	9	158	-0.03546	3.11917e-06	FBgn0053087	LRP1	INTRON
2R_9344482_SNP	C	T	C	0.3397	53	103	-0.01666	3.18367e-06	FBgn0000119	arr	SYNONYMOUS_CODING
3R_10758287_INS	TGCTA	T	T	0.1125	18	142	-0.02384	3.41383e-06	INTERGENIC
2L_13950884_SNP	T	A	A	0.05	8	152	-0.03652	3.47402e-06	FBgn0032536	Ance-3	INTRON
X_3028788_SNP	T	C	C	0.1697	28	137	-0.02038	3.66794e-06	FBgn0004647	N	117 bp UPSTREAM	FBgn0028369	kirre	223 bp DOWNSTREAM
X_13034128_SNP	C	A	A	0.05096	8	149	-0.03498	4.06283e-06	FBgn0052645	CG32645	INTRON
2L_14459171_SNP	G	A	A	0.1523	23	128	-0.02189	4.13168e-06	INTERGENIC
3L_4524842_SNP	A	G	G	0.1818	30	135	-0.01983	4.28063e-06	FBgn0014073	Tie	INTRON
3L_2474704_INS	TA	G	G	0.06098	10	154	-0.0311	4.42103e-06	FBgn0035343	CG16762	UTR_3_PRIME	FBgn0035347	CG33232	INTRON
3L_2474444_SNP	C	T	T	0.07229	12	154	-0.02914	4.49849e-06	FBgn0035347	CG33232	INTRON	FBgn0035343	CG16762	223 bp DOWNSTREAM
3R_16821867_SNP	A	C	C	0.05488	9	155	-0.03377	4.49958e-06	FBgn0013995	Calx	INTRON
2R_12328786_SNP	G	T	T	0.06024	10	156	-0.03181	4.54074e-06	INTERGENIC
2R_1373634_SNP	T	C	C	0.1042	15	129	-0.02711	4.76799e-06	FBgn0050440	CG30440	INTRON
X_14209478_SNP	A	G	G	0.07143	11	143	-0.03076	5.10974e-06	FBgn0030563	betaNACtes2	INTRON	FBgn0052598	betaNACtes6	685 bp DOWNSTREAM
3L_7802500_SNP	A	C	C	0.07101	12	157	-0.0296	5.23854e-06	FBgn0052369	CG32369	UTR_5_PRIME
3R_10675564_SNP	T	A	A	0.0559	9	152	-0.03189	5.32135e-06	FBgn0264754	btsz	INTRON
3R_2515731_SNP	A	G	G	0.08609	13	138	-0.0281	5.43955e-06	FBgn0004778	Ccp84Af	SYNONYMOUS_CODING	FBgn0004779	Ccp84Ae	878 bp DOWNSTREAM
2R_4121445_SNP	A	G	G	0.05389	9	158	-0.03473	5.4836e-06	INTERGENIC
2R_6947264_SNP	T	C	T	0.4658	75	86	-0.01534	5.7162e-06	FBgn0040765	luna	INTRON
3L_2485794_SNP	A	G	G	0.06875	11	149	-0.03036	5.77831e-06	FBgn0035347	CG33232	INTRON
2L_19600824_SNP	G	T	T	0.06522	9	129	-0.03341	6.00573e-06	FBgn0000464	Lar	INTRON
2L_8329319_SNP	G	T	G	0.2857	44	110	-0.01699	6.08484e-06	FBgn0032022	CG14275	INTRON
2R_4078788_SNP	A	G	G	0.06748	11	152	-0.03115	6.28213e-06	FBgn0053087	LRP1	INTRON
2L_13951928_SNP	G	A	A	0.05031	8	151	-0.03517	6.36059e-06	FBgn0032536	Ance-3	INTRON
2L_849404_SNP	A	T	T	0.09202	15	148	-0.02668	6.39722e-06	FBgn0020304	drongo	INTRON
2L_3278015_SNP	A	T	A	0.1341	22	142	-0.02216	6.45873e-06	FBgn0031514	CG3332	INTRON
3L_9433049_SNP	A	C	A	0.06587	11	156	-0.03093	6.51101e-06	FBgn0260859	Bet3	INTRON	FBgn0035993	Nf-YA	107 bp DOWNSTREAM
3R_2859869_DEL	C	CC	CC	0.1139	18	140	-0.02381	6.55509e-06	INTERGENIC
3R_10701359_SNP	T	A	T	0.2485	41	124	-0.01688	6.74137e-06	FBgn0264754	btsz	149 bp UPSTREAM
3L_9431447_SNP	T	C	C	0.05389	9	158	-0.03389	6.77944e-06	FBgn0040305	MTF-1	UTR_3_PRIME	FBgn0260859	Bet3	135 bp DOWNSTREAM
2L_8976164_SNP	A	T	T	0.07333	11	139	-0.03095	6.85214e-06	FBgn0032083	CG9541	736 bp UPSTREAM
2L_13950520_SNP	G	C	C	0.0679	11	151	-0.0306	6.85374e-06	FBgn0032536	Ance-3	INTRON
3R_10675557_SNP	G	A	A	0.05625	9	151	-0.03152	6.91018e-06	FBgn0264754	btsz	INTRON
2R_1228931_INS	TG	T	T	0.07595	12	146	-0.02915	7.08777e-06	FBgn0033017	CG10465	432 bp UPSTREAM
2R_1228937_INS	ATTTC	T	T	0.07595	12	146	-0.02915	7.08777e-06	FBgn0033017	CG10465	437 bp UPSTREAM
3R_7106772_SNP	G	A	A	0.0559	9	152	-0.03261	7.25953e-06	FBgn0051386	CR31386	INTRON
2L_8976174_DEL	T	TTT	TTT	0.0719	11	142	-0.03085	7.48386e-06	FBgn0032083	CG9541	747 bp UPSTREAM
3L_3809249_SNP	C	T	T	0.05389	9	158	-0.03327	7.67114e-06	FBgn0052262	CG32262	UTR_3_PRIME	FBgn0035462	IntS10	159 bp DOWNSTREAM
2R_1228929_SNP	T	C	C	0.07643	12	145	-0.02901	7.90057e-06	FBgn0033017	CG10465	429 bp UPSTREAM
3L_2485700_SNP	G	C	C	0.05952	10	158	-0.03128	8.04631e-06	FBgn0035347	CG33232	INTRON
2L_16658075_INS	ACAA	A	A	0.0625	10	150	-0.03209	8.18672e-06	FBgn0259735	CG42389	CODON_CHANGE_PLUS_CODON_INSERTION
2R_10552864_SNP	G	A	A	0.05325	9	160	-0.03303	8.67197e-06	FBgn0033953	CG12861	8 bp UPSTREAM	FBgn0033954	CG12860	282 bp DOWNSTREAM
X_14213277_SNP	C	T	T	0.08387	13	142	-0.02806	8.69432e-06	INTERGENIC
3L_4846164_SNP	A	C	A	0.07143	12	156	-0.02896	9.09284e-06	INTERGENIC
X_3028567_SNP	A	C	C	0.1078	18	149	-0.0234	9.10889e-06	FBgn0028369	kirre	2 bp DOWNSTREAM	FBgn0004647	N	338 bp UPSTREAM
3R_25301545_SNP	A	G	A	0.1024	17	149	-0.02418	9.14287e-06	FBgn0004369	Ptp99A	INTRON
2R_13938786_SNP	T	G	G	0.05389	9	158	-0.03391	9.16099e-06	FBgn0034294	Muc55B	SYNONYMOUS_CODING
2L_14915033_SNP	G	A	A	0.1166	19	144	-0.02381	9.44151e-06	FBgn0259213	CG42313	INTRON
2L_16103836_SNP	A	C	C	0.05521	9	154	-0.03259	9.80722e-06	INTERGENIC
2L_3400600_SNP	T	A	A	0.05422	9	157	-0.03235	9.97979e-06	INTERGENIC

## Sheet: F PC 4
Chromosomal Position	Minor Allele	Major Allele	Reference Allele	Minor Allele Frequency	Minor Allele Count	Major Allele Count	Effect Size	P-value	Flybase ID Gene1	Gene Symbol 1	Gene 1 Site Class	Flybase ID Gene 2	Gene Symbol 2	Gene 2 Site Class
3R_7760866_SNP	A	G	G	0.1875	30	130	0.01523	1.44511e-07	FBgn0037963	Cad87A	INTRON
3R_6959170_SNP	T	C	C	0.09938	16	145	0.01934	4.64056e-07	INTERGENIC
3R_6606499_SNP	G	C	C	0.05357	9	159	-0.02372	9.10183e-07	FBgn0037832	Desi	UTR_3_PRIME	FBgn0261356	CG42633	188 bp DOWNSTREAM
3R_6628151_SNP	A	T	T	0.05422	9	157	-0.02368	9.67147e-07	FBgn0037836	CG14692	MISSENSE
3L_3755942_INS	ATTCACA	A	A	0.06627	11	155	0.02212	1.12602e-06	FBgn0052264	CG32264	INTRON	FBgn0035458	CG10858	742 bp UPSTREAM
3R_7760894_INS	CT	C	C	0.1812	29	131	0.01447	1.35513e-06	FBgn0037963	Cad87A	INTRON
3R_6552403_SNP	A	C	C	0.2975	47	111	-0.0118	1.59684e-06	INTERGENIC
3R_7746981_SNP	T	C	C	0.1118	18	143	0.01717	1.66966e-06	FBgn0037963	Cad87A	INTRON
2L_16008951_SNP	G	C	C	0.07229	12	154	0.01975	1.9091e-06	FBgn0028644	beat-Ic	INTRON
3R_6623940_SNP	T	G	G	0.05488	9	155	-0.02303	2.01288e-06	FBgn0037836	CG14692	MISSENSE
3R_7760836_SNP	G	A	A	0.172	27	130	0.01476	2.21913e-06	FBgn0037963	Cad87A	INTRON
2L_1979069_SNP	A	T	T	0.07006	11	146	-0.02058	2.36991e-06	FBgn0031377	CG15356	MISSENSE
3R_20610616_SNP	G	A	G	0.475	76	84	0.01064	2.39033e-06	FBgn0039223	CG5805	UTR_3_PRIME	FBgn0259233	CG42331	332 bp DOWNSTREAM
3R_6614315_SNP	A	G	G	0.06024	10	156	-0.02169	2.65943e-06	FBgn0017577	Mcm5	UTR_5_PRIME	FBgn0037834	Art1	367 bp UPSTREAM
3R_6968594_SNP	T	G	G	0.1366	22	139	0.01548	2.82875e-06	INTERGENIC
X_16614089_SNP	C	A	A	0.06587	11	156	-0.0206	2.84626e-06	FBgn0085354	CG34325	INTRON
3R_6605526_SNP	T	C	C	0.05988	10	157	-0.02158	2.98127e-06	FBgn0037832	Desi	INTRON
3R_6639347_SNP	A	C	C	0.1321	21	138	-0.01533	3.04255e-06	FBgn0037837	CG14693	124 bp DOWNSTREAM
3R_6554251_SNP	A	C	C	0.2968	46	109	-0.01174	3.10359e-06	INTERGENIC
3R_11863987_SNP	T	C	C	0.09756	16	148	0.01732	3.18145e-06	FBgn0003117	pnr	INTRON
X_10915916_SNP	A	C	C	0.07831	13	153	-0.01879	4.03139e-06	FBgn0259241	CG42339	INTRON
2R_17686495_SNP	C	G	G	0.3902	64	100	0.01063	4.11092e-06	FBgn0042098	CG18735	SYNONYMOUS_CODING	FBgn0034661	CG4386	340 bp DOWNSTREAM
X_8470913_SNP	A	T	T	0.2697	41	111	-0.01224	4.32539e-06	FBgn0030052	CG12065	INTRON
3R_6605107_SNP	C	A	A	0.05389	9	158	-0.02231	4.40142e-06	FBgn0037832	Desi	184 bp UPSTREAM
3L_14816382_INS	AA	A	A	0.4305	65	86	0.01023	6.10192e-06	FBgn0036454	CG17839	INTRON
3L_13022507_SNP	G	T	T	0.05325	9	160	-0.02169	6.33799e-06	FBgn0083978	CG17672	INTRON
3R_6640760_SNP	A	G	G	0.07317	12	152	-0.01928	6.78417e-06	FBgn0037837	CG14693	UTR_5_PRIME	FBgn0037838	CG4089	250 bp UPSTREAM
3R_6553711_SNP	T	C	C	0.05556	9	153	-0.02191	7.01962e-06	INTERGENIC
3R_6602101_SNP	A	G	G	0.08383	14	153	-0.01796	7.03853e-06	FBgn0020439	fau	INTRON
3R_6968593_SNP	A	G	G	0.142	23	139	0.01471	7.15833e-06	INTERGENIC
3R_6552411_SNP	G	A	G	0.3846	60	96	-0.01051	7.33881e-06	INTERGENIC
3R_6602791_SNP	C	T	T	0.06098	10	154	-0.02076	7.46066e-06	FBgn0020439	fau	INTRON
3R_6127361_SNP	T	G	G	0.05422	9	157	-0.02185	7.56088e-06	FBgn0262617	CG43143	112 bp DOWNSTREAM
3R_25354925_SNP	G	A	A	0.05988	10	157	-0.02043	8.15744e-06	INTERGENIC
3R_8075703_SNP	T	G	G	0.06061	10	155	0.02054	8.25194e-06	INTERGENIC
3L_14816192_SNP	G	C	C	0.4161	67	94	0.009868	8.48557e-06	FBgn0036454	CG17839	INTRON
3L_12990194_SNP	T	C	C	0.05325	9	160	-0.02103	8.48969e-06	FBgn0036329	CG11262	SYNONYMOUS_CODING
3R_6603359_SNP	A	G	G	0.05325	9	160	-0.02155	9.16704e-06	FBgn0020439	fau	263 bp UPSTREAM
3R_6961228_SNP	C	A	A	0.125	20	140	0.01545	9.20376e-06	INTERGENIC
3R_6240000_SNP	T	C	C	0.1411	23	140	-0.01378	9.46702e-06	FBgn0037816	CG6345	SYNONYMOUS_CODING	FBgn0037815	Rrp46	36 bp DOWNSTREAM
3R_667672_SNP	A	T	A	0.2208	34	120	0.012	9.7673e-06	INTERGENIC
2R_17685377_SNP	G	A	G	0.3758	62	103	0.01019	9.80553e-06	FBgn0042098	CG18735	200 bp DOWNSTREAM	FBgn0085233	CG34204	931 bp DOWNSTREAM

## Sheet: F PC 5
Chromosomal Position	Minor Allele	Major Allele	Reference Allele	Minor Allele Frequency	Minor Allele Count	Major Allele Count	Effect Size	P-value	Flybase ID Gene1	Gene Symbol 1	Gene 1 Site Class	Flybase ID Gene 2	Gene Symbol 2	Gene 2 Site Class
3R_12834866_SNP	A	T	T	0.09877	16	146	-0.01308	8.79836e-07	FBgn0038466	CG8907	INTRON
3R_12836822_SNP	G	T	T	0.0974	15	139	-0.01334	1.21791e-06	FBgn0038466	CG8907	INTRON
3R_12833413_SNP	T	G	G	0.09615	15	141	-0.01318	1.62829e-06	FBgn0038465	Irc	483 bp DOWNSTREAM	FBgn0038466	CG8907	578 bp UPSTREAM
3R_12832575_SNP	C	T	T	0.103	17	148	-0.01241	1.67224e-06	FBgn0038465	Irc	SYNONYMOUS_CODING
3R_12831875_SNP	A	T	T	0.103	17	148	-0.0124	1.71236e-06	FBgn0038465	Irc	SYNONYMOUS_CODING
3R_12838932_SNP	T	C	C	0.1151	16	123	-0.01284	1.8084e-06	FBgn0038466	CG8907	677 bp DOWNSTREAM
2R_7453946_SNP	C	G	G	0.05521	9	154	0.01655	1.87557e-06	INTERGENIC
3L_17351482_SNP	T	A	A	0.05357	9	159	0.0165	1.95971e-06	FBgn0036714	CG7692	326 bp DOWNSTREAM
3R_12831592_SNP	A	T	T	0.08537	14	150	-0.01343	2.07528e-06	FBgn0038465	Irc	SYNONYMOUS_CODING
3R_12834780_SNP	C	T	T	0.1043	17	146	-0.01231	2.11605e-06	FBgn0038466	CG8907	INTRON
3R_12839026_DEL	T	TTTCGCTTTCTGCGGCGGT	TTTCGCTTTCTGCGGCGGT	0.07317	12	152	-0.01436	2.27722e-06	FBgn0038466	CG8907	DOWNSTREAM
3R_12831761_SNP	C	T	T	0.09146	15	149	-0.01294	2.39451e-06	FBgn0038465	Irc	INTRON
3R_12836742_SNP	A	G	G	0.08485	14	151	-0.01329	2.69772e-06	FBgn0038466	CG8907	INTRON
2R_12439607_SNP	C	A	C	0.07273	12	153	0.01422	2.86238e-06	FBgn0034135	Syn2	158 bp UPSTREAM
3R_12831108_SNP	T	A	A	0.1212	20	145	-0.0113	2.94123e-06	FBgn0038465	Irc	INTRON
3R_12831804_SNP	T	A	A	0.1091	18	147	-0.01183	2.98223e-06	FBgn0038465	Irc	INTRON
3L_23587619_SNP	G	T	T	0.05357	9	159	0.01621	3.05829e-06	FBgn0250816	AGO3	INTRON
3R_12838936_SNP	T	A	A	0.09524	16	152	-0.01242	3.11793e-06	FBgn0038466	CG8907	681 bp DOWNSTREAM
3R_12839083_SNP	C	A	A	0.09524	16	152	-0.01242	3.11793e-06	FBgn0038466	CG8907	828 bp DOWNSTREAM
2R_11659989_DEL	G	GTTGCACACCCGTTTACCCCCTTTCCCTTCG	GTTGCACACCCGTTTACCCCCTTTCCCTTCG	0.07186	12	155	-0.01416	3.12015e-06	FBgn0083919	Zasp52	INTRON
3R_12612367_SNP	T	C	C	0.05389	9	158	0.01619	3.17948e-06	INTERGENIC
3R_12834191_SNP	A	G	G	0.1043	17	146	-0.01207	3.38828e-06	FBgn0038466	CG8907	INTRON
3R_12831703_SNP	A	T	T	0.1091	18	147	-0.01172	3.7132e-06	FBgn0038465	Irc	SYNONYMOUS_CODING
3R_12838941_SNP	A	T	T	0.08434	14	152	-0.01311	3.71869e-06	FBgn0038466	CG8907	686 bp DOWNSTREAM
3R_12840422_SNP	T	C	C	0.08537	14	150	-0.01311	3.72242e-06	FBgn0004577	Pxd	UTR_5_PRIME
3R_12828175_SNP	C	A	A	0.1024	17	149	-0.01198	3.9963e-06	FBgn0038464	CG16941	UPSTREAM	FBgn0038465	Irc	422 bp UPSTREAM
3L_17372534_SNP	T	C	C	0.05325	9	160	0.01601	4.11457e-06	FBgn0036715	Cad74A	UTR_5_PRIME	FBgn0036716	CG13728	592 bp DOWNSTREAM
3R_12830782_SNP	G	T	T	0.1091	18	147	-0.01162	4.52438e-06	FBgn0038465	Irc	INTRON
2L_10292892_SNP	T	A	A	0.07595	12	146	-0.01389	5.17749e-06	FBgn0032209	Hand	INTRON	FBgn0032208	CG5604	614 bp UPSTREAM
3L_11437419_SNP	A	C	C	0.1056	17	144	-0.01185	5.2939e-06	FBgn0036159	CG7557	842 bp UPSTREAM
3L_11437412_SNP	A	T	T	0.1056	17	144	-0.01185	5.35651e-06	FBgn0036159	CG7557	849 bp UPSTREAM
3L_17375535_SNP	A	C	C	0.05455	9	156	0.01584	5.37795e-06	FBgn0036716	CG13728	INTRON
3R_14266676_SNP	G	T	T	0.05455	9	156	0.01582	5.47934e-06	FBgn0004652	fru	INTRON
3R_12832039_SNP	A	C	C	0.1203	19	139	-0.01128	5.53013e-06	FBgn0038465	Irc	INTRON
3R_12828143_SNP	C	T	T	0.1091	18	147	-0.01151	5.60975e-06	FBgn0038464	CG16941	66 bp UPSTREAM	FBgn0038465	Irc	454 bp UPSTREAM
3L_22342609_SNP	T	G	G	0.05389	9	158	0.01579	5.71379e-06	FBgn0004449	Ten-m	INTRON
3R_12829498_SNP	A	T	T	0.09091	14	140	-0.01289	6.0032e-06	FBgn0038465	Irc	INTRON
X_16251282_SNP	G	T	T	0.05357	9	159	0.01572	6.29674e-06	FBgn0005411	U2af50	INTRON	FBgn0003416	sl	762 bp DOWNSTREAM
X_14745401_SNP	C	T	T	0.06627	11	155	0.01431	6.31232e-06	FBgn0030588	CG9521	SYNONYMOUS_CODING	FBgn0264078	Flo-2	INTRON
3R_2061020_SNP	T	C	C	0.1161	18	137	0.01148	6.53441e-06	FBgn0027527	Osi6	INTRON
3R_12831005_SNP	T	C	C	0.1152	19	146	-0.01116	6.64888e-06	FBgn0038465	Irc	MISSENSE
3L_17402008_SNP	C	T	T	0.06024	10	156	0.01491	6.83151e-06	FBgn0027660	blot	INTRON
X_16251281_SNP	C	T	T	0.05325	9	160	0.01566	6.84362e-06	FBgn0005411	U2af50	INTRON	FBgn0003416	sl	761 bp DOWNSTREAM
3L_17402156_SNP	T	A	A	0.06024	10	156	0.01488	7.12863e-06	FBgn0027660	blot	INTRON
3L_23865641_SNP	A	G	A	0.05063	8	150	0.01654	7.29293e-06	FBgn0058470	CG40470	INTRON
3R_12625669_DEL	A	AAGT	AAGT	0.05455	9	156	0.0156	7.49562e-06	INTERGENIC
3R_12625674_SNP	T	G	G	0.05455	9	156	0.0156	7.49562e-06	INTERGENIC
3R_12840256_SNP	C	T	T	0.08982	15	152	-0.01232	7.5371e-06	FBgn0004577	Pxd	42 bp UPSTREAM
3R_12845119_SNP	A	G	G	0.1006	17	152	-0.01164	7.55725e-06	FBgn0004577	Pxd	INTRON	FBgn0038467	CG3590	UTR_3_PRIME
3R_12834562_SNP	G	A	A	0.1125	18	142	-0.01138	7.57752e-06	FBgn0038466	CG8907	INTRON
3R_10212149_SNP	T	C	C	0.05488	9	155	0.01558	7.82453e-06	INTERGENIC
3R_12840070_INS	AAA	A	A	0.06748	11	152	-0.01418	7.89631e-06	FBgn0004577	Pxd	227 bp UPSTREAM
3R_12844513_SNP	C	T	T	0.1043	17	146	-0.01164	7.91853e-06	FBgn0004577	Pxd	INTRON	FBgn0038467	CG3590	UTR_3_PRIME
3R_12608622_SNP	T	G	G	0.06135	10	153	0.01481	8.1027e-06	INTERGENIC
3L_23748531_SNP	A	T	T	0.06509	11	158	0.01414	8.1653e-06	INTERGENIC
3R_12625675_DEL	A	AAAGACAAAGCCCGC	AAAGACAAAGCCCGC	0.05422	9	157	0.01553	8.25568e-06	INTERGENIC
3R_12625691_MNP	TGT	GAG	GAG	0.05422	9	157	0.01553	8.25568e-06	INTERGENIC
3R_12832005_SNP	A	C	C	0.1296	21	141	-0.01059	8.47968e-06	FBgn0038465	Irc	INTRON
3R_12832029_SNP	A	T	T	0.1296	21	141	-0.01059	8.47968e-06	FBgn0038465	Irc	INTRON
3R_12832033_SNP	A	G	G	0.1296	21	141	-0.01059	8.47968e-06	FBgn0038465	Irc	INTRON
2R_10607384_SNP	A	G	G	0.08485	14	151	-0.01263	8.67658e-06	INTERGENIC
3R_12834939_SNP	G	T	T	0.1313	21	139	-0.01058	8.72078e-06	FBgn0038466	CG8907	INTRON
3R_12831559_SNP	C	G	G	0.08537	14	150	-0.01263	8.74803e-06	FBgn0038465	Irc	MISSENSE
3R_12612434_SNP	G	T	T	0.05917	10	159	0.01474	8.75998e-06	INTERGENIC
3R_12600819_SNP	C	T	T	0.05521	9	154	0.01548	8.9916e-06	INTERGENIC
2L_1968038_SNP	T	A	A	0.06832	11	150	0.01406	9.53999e-06	FBgn0031375	erm	INTRON
3R_12625649_SNP	A	C	C	0.05455	9	156	0.01543	9.55829e-06	INTERGENIC
2R_8445601_SNP	G	T	T	0.05422	9	157	0.01543	9.56304e-06	FBgn0011592	fra	INTRON
2R_12823705_SNP	A	G	G	0.1145	19	147	0.01097	9.61894e-06	FBgn0003091	Pkc53E	INTRON
3R_12625628_SNP	A	T	T	0.05422	9	157	0.01542	9.64491e-06	INTERGENIC
3R_12625630_DEL	C	CCCGCATACAA	CCCGCATACAA	0.05422	9	157	0.01542	9.64491e-06	INTERGENIC
3R_12625644_SNP	A	T	T	0.05422	9	157	0.01542	9.64491e-06	INTERGENIC
3R_12625655_DEL	A	ATGTGCGGAATC	ATGTGCGGAATC	0.05422	9	157	0.01542	9.64491e-06	INTERGENIC
3L_17370945_SNP	T	G	G	0.05521	9	154	0.01542	9.80778e-06	FBgn0036715	Cad74A	INTRON
3R_17529873_SNP	G	A	A	0.05521	9	154	-0.01542	9.86981e-06	FBgn0051176	CG31176	INTRON

## Sheet: F PC 6
Chromosomal Position	Minor Allele	Major Allele	Reference Allele	Minor Allele Frequency	Minor Allele Count	Major Allele Count	Effect Size	P-value	Flybase ID Gene1	Gene Symbol 1	Gene 1 Site Class	Flybase ID Gene 2	Gene Symbol 2	Gene 2 Site Class	Flybase ID Gene 3	Gene Symbol 3	Gene 3 Site Class	Flybase ID Gene 4	Gene Symbol 4	Gene 4 Site Class
3R_6886542_SNP	C	A	A	0.06548	11	157	0.01678	1.5645e-10	INTERGENIC
3R_6793235_SNP	T	A	A	0.05325	9	160	0.01729	7.80757e-09	INTERGENIC
3R_6566588_SNP	C	T	T	0.05732	9	148	0.01696	1.07068e-08	FBgn0004841	Takr86C	INTRON
3R_16995438_SNP	A	C	C	0.06627	11	155	0.0153	1.23766e-08	FBgn0264357	SNF4Agamma	INTRON
3R_20769505_SNP	T	C	C	0.07547	12	147	0.01428	2.28003e-08	FBgn0029157	ssh	INTRON
3R_6548773_SNP	T	C	C	0.05031	8	151	0.01756	2.6784e-08	INTERGENIC
3L_6828177_SNP	T	G	G	0.06024	10	156	0.01571	2.6849e-08	INTERGENIC
3L_6832648_SNP	T	C	C	0.05952	10	158	0.01565	3.0069e-08	INTERGENIC
3L_6833870_SNP	A	C	C	0.05988	10	157	0.01565	3.04885e-08	INTERGENIC
3R_16996633_SNP	G	T	T	0.05422	9	157	0.01635	3.1663e-08	FBgn0264357	SNF4Agamma	INTRON
3R_6560788_SNP	A	T	T	0.05357	9	159	0.0165	3.19463e-08	FBgn0037828	tomboy20	211 bp DOWNSTREAM
3R_5662321_SNP	G	A	A	0.05031	8	151	0.01752	3.52697e-08	FBgn0037766	Teh1	INTRON
3R_6570791_SNP	G	T	T	0.05128	8	148	0.01743	3.60091e-08	FBgn0004841	Takr86C	INTRON
3R_6626699_SNP	T	C	C	0.05696	9	149	0.01657	3.6566e-08	FBgn0037836	CG14692	SYNONYMOUS_CODING
3R_6522293_SNP	G	A	A	0.05325	9	160	0.01642	3.79534e-08	FBgn0020385	pug	76 bp UPSTREAM	FBgn0037822	CG14683	76 bp UPSTREAM	FBgn0262717	Skeletor	301 bp DOWNSTREAM
3R_6522003_SNP	A	G	G	0.05357	9	159	0.0164	3.97535e-08	FBgn0262717	Skeletor	11 bp DOWNSTREAM	FBgn0020385	pug	237 bp UPSTREAM	FBgn0037822	CG14683	366 bp UPSTREAM
3R_6794200_SNP	T	G	G	0.05389	9	158	0.01643	5.17642e-08	INTERGENIC
3R_6530187_SNP	T	C	C	0.06627	11	155	0.01472	6.27762e-08	FBgn0051391	CG31391	SYNONYMOUS_CODING	FBgn0051467	CG31467	705 bp DOWNSTREAM
3R_6537979_SNP	C	A	A	0.06667	11	154	0.01473	6.37483e-08	INTERGENIC
3R_6531524_SNP	G	C	C	0.06667	11	154	0.0147	6.68634e-08	FBgn0051467	CG31467	SYNONYMOUS_CODING	FBgn0051391	CG31391	727 bp UPSTREAM
3L_2603166_SNP	T	C	C	0.05952	10	158	0.01528	6.74052e-08	FBgn0011828	Pxn	SYNONYMOUS_CODING
3L_2603202_SNP	A	G	G	0.05952	10	158	0.01528	6.74052e-08	FBgn0011828	Pxn	SYNONYMOUS_CODING
3R_6794199_SNP	C	T	T	0.05917	10	159	0.01549	6.91726e-08	INTERGENIC
3R_13711244_SNP	G	A	A	0.07927	13	151	0.01351	8.00258e-08	FBgn0053547	Rim	INTRON
2L_8386124_SNP	G	T	T	0.05488	9	155	0.01609	8.79005e-08	FBgn0032036	CG13384	INTRON
3R_6534078_SNP	T	G	G	0.05556	9	153	0.01603	9.5035e-08	FBgn0051278	CG31278	16 bp UPSTREAM	FBgn0051373	CG31373	131 bp DOWNSTREAM	FBgn0037824	CG14684	896 bp DOWNSTREAM
3R_5926853_SNP	T	G	G	0.06587	11	156	0.01437	1.06032e-07	FBgn0262459	mir-34	97 bp DOWNSTREAM	FBgn0028734	Fmr1	289 bp DOWNSTREAM	FBgn0263413	CR43459	916 bp DOWNSTREAM
3R_6471558_SNP	G	T	T	0.07229	12	154	0.01392	1.0624e-07	FBgn0264788	CR44018	63 bp DOWNSTREAM
3R_6794625_SNP	G	T	T	0.06548	11	157	0.01449	1.27983e-07	INTERGENIC
3R_6878267_SNP	G	A	A	0.07879	13	152	0.01307	1.53324e-07	INTERGENIC
3L_6832424_SNP	T	G	G	0.07186	12	155	0.0135	2.34571e-07	INTERGENIC
3R_6782185_SNP	T	C	C	0.05389	9	158	0.01581	2.59054e-07	INTERGENIC
2L_8389677_SNP	A	T	T	0.07362	12	151	0.01338	2.6654e-07	FBgn0041717	snRNA:U6atac:29B	47 bp UPSTREAM	FBgn0262002	CG42820	204 bp DOWNSTREAM	FBgn0262001	CG42819	346 bp UPSTREAM	FBgn0032036	CG13384	873 bp DOWNSTREAM
2L_8378358_SNP	A	T	T	0.06098	10	154	0.0147	2.71271e-07	FBgn0027094	Aats-ala	UTR_3_PRIME	FBgn0032032	CG17294	152 bp DOWNSTREAM
3L_2603103_SNP	T	C	C	0.05357	9	159	0.01538	2.74388e-07	FBgn0011828	Pxn	SYNONYMOUS_CODING
3R_1280893_INS	TTGTAGTTAATTAGAATTCCCATTACTTCTGATGTAGTTAATAAAGTCTCAAAACGCAGTTGGTCATTTTATCTTTATTTGGTTTTTATTAAGCGAGCGTACATTCCAGATCTATTCCTGATTTATCACTGATCTTAGTGTGGTCTACAGGCAGATCTCTTGTGACAGCCAAGTGCTGACACTAGCAAATTCTGCAATATGTATGTATGAAGTTCATACTCGATAACCAATGGGAGTCGAGTGCGACCCCTAAAGGCGTACATGCTGAATTCGCATATTTAGTATTAGGGTGTATCTAAAGATCTACTAGGGTGACCCTAAGGAATTAGGGTGGTCCTAAGTTTACTTATTAGTTGACTTATTATTATGATTCATATTATAATTATTATTAATATTATT…	T	T	0.05031	8	151	0.01638	2.90583e-07	FBgn0037326	CG14669	INTRON
3R_5662272_SNP	C	A	A	0.06061	10	155	0.01475	3.09794e-07	FBgn0037766	Teh1	INTRON
3R_6792731_SNP	C	A	A	0.07738	13	155	0.0132	3.19847e-07	INTERGENIC
3R_6799654_SNP	A	T	T	0.06548	11	157	0.01404	3.25674e-07	FBgn0083950	CG34114	INTRON
2L_8390409_SNP	C	T	T	0.06061	10	155	0.01483	3.52365e-07	FBgn0262002	CG42820	SYNONYMOUS_CODING	FBgn0041717	snRNA:U6atac:29B	589 bp DOWNSTREAM
3L_6846707_MNP	AAA	TTT	TTT	0.05521	9	154	0.01512	3.6879e-07	INTERGENIC
3R_18728649_SNP	T	G	G	0.05988	10	157	0.0145	3.71298e-07	FBgn0017590	klg	INTRON
3L_6846730_SNP	G	A	A	0.05455	9	156	0.01513	3.72675e-07	INTERGENIC
3L_6207175_SNP	G	C	C	0.07879	13	152	0.01263	4.01798e-07	FBgn0002526	LanA	SYNONYMOUS_CODING
2L_8377234_SNP	T	C	C	0.0559	9	152	0.0155	4.05397e-07	FBgn0032032	CG17294	SYNONYMOUS_CODING	FBgn0032031	CG13390	437 bp UPSTREAM
3L_6846720_SNP	A	G	G	0.05422	9	157	0.01505	4.2463e-07	INTERGENIC
3L_6846712_SNP	C	T	T	0.05521	9	154	0.01506	4.25326e-07	INTERGENIC
3R_6390313_SNP	T	G	G	0.07975	13	150	0.01272	4.43765e-07	FBgn0001235	hth	INTRON
3L_6843588_SNP	A	C	C	0.05357	9	159	0.015	4.67955e-07	INTERGENIC
3R_6505849_SNP	G	A	A	0.05325	9	160	0.01514	4.68667e-07	FBgn0037819	CG14688	INTRON
3L_6834282_SNP	T	A	A	0.06509	11	158	0.01379	4.74526e-07	INTERGENIC
3L_6846701_SNP	T	A	A	0.0559	9	152	0.01497	4.87147e-07	INTERGENIC
3L_6846640_SNP	C	G	G	0.05422	9	157	0.01497	4.92023e-07	INTERGENIC
3R_6588612_SNP	A	C	C	0.05422	9	157	0.01511	4.97198e-07	FBgn0037831	Cap-H2	INTRON
3L_6846671_SNP	C	G	G	0.05389	9	158	0.01495	4.97817e-07	INTERGENIC
3L_6846690_SNP	A	T	T	0.05488	9	155	0.01497	4.98352e-07	INTERGENIC
3L_6833758_SNP	A	C	A	0.06548	11	157	0.01377	4.98394e-07	INTERGENIC
3L_6840337_SNP	A	G	G	0.05325	9	160	0.01495	5.11332e-07	INTERGENIC
3L_6842094_SNP	G	A	A	0.05325	9	160	0.01495	5.11332e-07	INTERGENIC
3L_6846028_SNP	A	T	T	0.05325	9	160	0.01495	5.11332e-07	INTERGENIC
3L_6846031_SNP	G	T	T	0.05325	9	160	0.01495	5.11332e-07	INTERGENIC
3L_4546790_SNP	G	C	G	0.08284	14	155	0.01214	5.33232e-07	FBgn0035558	CG11357	INTRON
3L_6846697_SNP	A	G	G	0.05556	9	153	0.01493	5.45011e-07	INTERGENIC
3L_6837039_SNP	T	G	G	0.05357	9	159	0.01492	5.45506e-07	INTERGENIC
3R_6553711_SNP	T	C	C	0.05556	9	153	0.01525	5.5523e-07	INTERGENIC
3L_6846714_SNP	A	T	T	0.05556	9	153	0.01489	5.78829e-07	INTERGENIC
3L_6825530_SNP	A	C	C	0.07186	12	155	0.01307	6.16326e-07	INTERGENIC
3L_12580004_SNP	C	A	C	0.05	8	152	0.01599	6.26493e-07	FBgn0015904	ara	INTRON
3L_6825853_SNP	T	C	C	0.06587	11	156	0.01352	6.28712e-07	INTERGENIC
X_5811619_DEL	A	AA	AA	0.0559	9	152	0.01504	6.47957e-07	FBgn0029824	CG3726	UTR_5_PRIME	FBgn0029823	CG3011	790 bp UPSTREAM
3L_6846689_SNP	C	A	A	0.0559	9	152	0.01483	6.55665e-07	INTERGENIC
3R_6458020_SNP	A	G	G	0.07927	13	151	0.0127	7.06051e-07	FBgn0001235	hth	INTRON
2L_8370126_SNP	A	G	G	0.08025	13	149	0.01252	7.07641e-07	FBgn0260439	Pp2A-29B	44 bp DOWNSTREAM	FBgn0032029	CG17292	387 bp UPSTREAM
3R_7932111_SNP	A	G	G	0.07186	12	155	0.01315	7.27388e-07	FBgn0051361	dpr17	INTRON
3R_6795694_SNP	C	A	A	0.07143	12	156	0.0131	8.24249e-07	INTERGENIC
3R_23875991_SNP	A	G	G	0.1509	24	135	0.009914	8.41682e-07	FBgn0085391	CG34362	INTRON
3R_6628151_SNP	A	T	T	0.05422	9	157	0.01491	8.45277e-07	FBgn0037836	CG14692	MISSENSE
3R_6606499_SNP	G	C	C	0.05357	9	159	0.0149	8.58054e-07	FBgn0037832	Desi	UTR_3_PRIME	FBgn0261356	CG42633	188 bp DOWNSTREAM
3L_6832446_SNP	G	A	A	0.06098	10	154	0.01394	9.99976e-07	INTERGENIC
2L_8388427_SNP	T	G	G	0.06707	11	153	0.0133	1.00632e-06	FBgn0032036	CG13384	UTR_3_PRIME	FBgn0262001	CG42819	301 bp DOWNSTREAM
3R_6800805_SNP	A	T	T	0.06135	10	153	0.01426	1.00701e-06	FBgn0083950	CG34114	INTRON
3R_6603359_SNP	A	G	G	0.05325	9	160	0.01482	1.01e-06	FBgn0020439	fau	263 bp UPSTREAM
3L_12580005_SNP	C	A	C	0.06211	10	151	0.01421	1.02012e-06	FBgn0015904	ara	INTRON
3L_2407174_SNP	T	C	C	0.06667	11	154	0.01321	1.02736e-06	FBgn0035338	CG13800	SYNONYMOUS_CODING	FBgn0261551	CG42669	INTRON
3L_2603160_SNP	A	T	T	0.06509	11	158	0.01336	1.05786e-06	FBgn0011828	Pxn	SYNONYMOUS_CODING
3R_6566870_SNP	T	A	A	0.05357	9	159	0.01481	1.06597e-06	FBgn0004841	Takr86C	INTRON
3R_18729791_SNP	A	G	G	0.1076	17	141	0.01068	1.10596e-06	FBgn0017590	klg	INTRON
3R_6799114_SNP	T	C	C	0.07186	12	155	0.0129	1.10728e-06	FBgn0083950	CG34114	INTRON
2L_8390940_SNP	T	C	C	0.07143	11	143	0.01336	1.13028e-06	FBgn0262002	CG42820	SYNONYMOUS_CODING
2R_15854712_SNP	T	C	C	0.07407	12	150	0.01284	1.13285e-06	INTERGENIC
3R_5647220_SNP	A	G	G	0.05556	9	153	0.01456	1.16824e-06	FBgn0262104	CG42857	307 bp UPSTREAM
3R_6548792_SNP	G	T	T	0.05625	9	151	0.01465	1.20251e-06	INTERGENIC
2L_8390244_SNP	G	C	C	0.07143	12	156	0.01274	1.20872e-06	FBgn0262002	CG42820	NON_SYNONYMOUS_CODING	FBgn0041717	snRNA:U6atac:29B	424 bp DOWNSTREAM	FBgn0262001	CG42819	913 bp UPSTREAM
2L_8390256_SNP	C	A	A	0.07143	12	156	0.01274	1.20872e-06	FBgn0262002	CG42820	NON_SYNONYMOUS_CODING	FBgn0041717	snRNA:U6atac:29B	436 bp DOWNSTREAM	FBgn0262001	CG42819	925 bp UPSTREAM
2L_8120619_SNP	T	G	G	0.05263	8	144	0.01611	1.24284e-06	FBgn0031985	mon2	INTRON
3L_6825200_SNP	T	G	G	0.05422	9	157	0.01456	1.24616e-06	INTERGENIC
3R_6548776_SNP	A	G	G	0.05625	9	151	0.0146	1.33751e-06	INTERGENIC
2L_8390388_SNP	T	C	C	0.07186	12	155	0.01269	1.34372e-06	FBgn0262002	CG42820	SYNONYMOUS_CODING	FBgn0041717	snRNA:U6atac:29B	568 bp DOWNSTREAM
2L_8390841_SNP	T	C	C	0.07186	12	155	0.01269	1.34372e-06	FBgn0262002	CG42820	SYNONYMOUS_CODING
3L_6832229_SNP	T	C	C	0.07101	12	157	0.01279	1.34668e-06	INTERGENIC
2L_8390832_SNP	A	C	C	0.07229	12	154	0.01269	1.37243e-06	FBgn0262002	CG42820	MISSENSE
3L_2603022_SNP	T	G	G	0.05422	9	157	0.01452	1.40596e-06	FBgn0011828	Pxn	SYNONYMOUS_CODING
X_13919039_SNP	C	A	A	0.07362	12	151	0.01251	1.48658e-06	FBgn0011980	tRNA:S774:12Ec	103 bp DOWNSTREAM	FBgn0011982	tRNA:S7:12Ed	560 bp DOWNSTREAM
3R_20370162_SNP	A	T	T	0.05521	9	154	0.01432	1.48684e-06	FBgn0039208	Esyt2	279 bp UPSTREAM	FBgn0039207	CG5789	526 bp UPSTREAM
3R_6353233_SNP	C	T	T	0.05357	9	159	0.01458	1.49314e-06	FBgn0001235	hth	INTRON
3R_6799239_SNP	A	T	T	0.07831	13	153	0.01225	1.52032e-06	FBgn0083950	CG34114	INTRON
3R_25699603_SNP	C	T	T	0.05488	9	155	0.01326	1.57528e-06	FBgn0083969	CG34133	SYNONYMOUS_CODING
2R_15853641_SNP	G	T	T	0.05389	9	158	0.01482	1.61695e-06	INTERGENIC
3R_5442129_SNP	T	C	C	0.05988	10	157	0.01365	1.74584e-06	FBgn0037720	CG8312	INTRON
X_13919373_SNP	A	G	G	0.07407	12	150	0.01243	1.76181e-06	FBgn0011980	tRNA:S774:12Ec	150 bp UPSTREAM	FBgn0011982	tRNA:S7:12Ed	226 bp DOWNSTREAM
3R_21093708_SNP	C	G	G	0.0559	9	152	0.01414	1.85483e-06	FBgn0263002	CR43310	23 bp UPSTREAM	FBgn0039306	CG11859	229 bp DOWNSTREAM	FBgn0039307	CR13656	675 bp UPSTREAM
3R_26960830_SNP	T	C	C	0.05063	8	150	0.01515	1.87494e-06	FBgn0013973	Gycbeta100B	INTRON
3R_5662217_DEL	T	TGCGGGTT	TGCGGGTT	0.05455	9	156	0.01457	1.98095e-06	FBgn0037766	Teh1	INTRON
3R_6588432_SNP	A	G	G	0.05952	10	158	0.01367	1.99525e-06	FBgn0037831	Cap-H2	INTRON
3R_6598335_SNP	T	C	C	0.05952	10	158	0.01367	1.99525e-06	FBgn0020439	fau	65 bp DOWNSTREAM
3R_25673625_SNP	A	C	A	0.05389	9	158	0.01421	2.00426e-06	FBgn0039709	Cad99C	INTRON
3L_1899674_SNP	G	A	G	0.1576	26	139	0.008926	2.01003e-06	FBgn0035290	CG1887	820 bp DOWNSTREAM
3L_11276755_SNP	T	C	C	0.05369	8	141	0.01522	2.0517e-06	INTERGENIC
2L_8384810_SNP	A	C	C	0.05521	9	154	0.01451	2.10145e-06	FBgn0032036	CG13384	UTR_5_PRIME	FBgn0263852	l(2)k12914	673 bp UPSTREAM
3R_6623940_SNP	T	G	G	0.05488	9	155	0.01433	2.13487e-06	FBgn0037836	CG14692	MISSENSE
2L_9513764_SNP	C	A	A	0.05263	8	144	0.01531	2.21641e-06	FBgn0032120	CG33298	INTRON
3R_6794478_SNP	C	T	T	0.06587	11	156	0.01313	2.22796e-06	INTERGENIC
3R_6794299_SNP	A	G	G	0.06548	11	157	0.01313	2.23473e-06	INTERGENIC
2L_8391528_SNP	C	T	T	0.06627	11	155	0.01293	2.33211e-06	FBgn0262002	CG42820	NON_SYNONYMOUS_CODING	FBgn0015583	Acp29AB	928 bp DOWNSTREAM
2R_18272552_SNP	C	A	A	0.05988	10	157	0.01346	2.37185e-06	FBgn0034723	CG13506	INTRON
2L_3998679_DEL	A	AAGTTTCAA	AAGTTTCAA	0.06918	11	148	0.01278	2.41097e-06	INTERGENIC
2L_10079962_SNP	T	A	T	0.07317	12	152	0.01168	2.4158e-06	FBgn0265002	CG44153	INTRON
3R_6501776_SNP	G	T	T	0.05357	9	159	0.01413	2.53106e-06	FBgn0037818	CG6465	INTRON
2L_7856321_SNP	T	C	C	0.05488	9	155	0.01421	2.61543e-06	FBgn0040099	lectin-28C	756 bp UPSTREAM
2R_12192249_SNP	A	G	G	0.07692	13	156	0.01195	2.63412e-06	INTERGENIC
3R_10036022_SNP	G	A	A	0.06667	11	154	0.01299	2.65353e-06	FBgn0011582	DopR	INTRON
3R_6518524_SNP	T	A	A	0.05917	10	159	0.0136	2.66993e-06	FBgn0262717	Skeletor	MISSENSE
3R_6527748_SNP	A	G	G	0.06098	10	154	0.01359	2.7054e-06	FBgn0020385	pug	SYNONYMOUS_CODING
3R_10036043_SNP	A	C	C	0.06667	11	154	0.01298	2.72203e-06	FBgn0011582	DopR	INTRON
3R_5645563_SNP	A	C	C	0.06061	10	155	0.01341	2.72467e-06	FBgn0037765	CG9458	NON_SYNONYMOUS_CODING	FBgn0262104	CG42857	673 bp DOWNSTREAM
3R_22897573_SNP	G	T	T	0.06173	10	152	0.01349	2.82438e-06	INTERGENIC
3R_6614315_SNP	A	G	G	0.06024	10	156	0.01356	2.82758e-06	FBgn0017577	Mcm5	UTR_5_PRIME	FBgn0037834	Art1	367 bp UPSTREAM
3R_20192700_SNP	T	C	C	0.05625	9	151	0.01402	2.84318e-06	FBgn0261993	CG42811	SYNONYMOUS_CODING	FBgn0261994	CG42812	382 bp DOWNSTREAM	FBgn0039193	CG13613	629 bp DOWNSTREAM
3L_6017446_SNP	T	C	C	0.05521	9	154	0.01416	2.90895e-06	FBgn0052406	CG32406	INTRON
3R_13714126_SNP	C	T	T	0.05325	9	160	0.01411	2.92042e-06	FBgn0053547	Rim	INTRON
3L_5941639_SNP	A	G	A	0.06627	11	155	0.01259	2.92206e-06	FBgn0053993	CG33993	INTRON
3L_8794571_SNP	T	G	G	0.05488	9	155	0.01424	2.93452e-06	FBgn0035929	CG13311	69 bp DOWNSTREAM	FBgn0035928	CG13310	939 bp UPSTREAM	FBgn0085455	CG34426	992 bp UPSTREAM
3R_6539077_SNP	G	C	C	0.05988	10	157	0.01351	2.95723e-06	INTERGENIC
3R_10036028_SNP	T	A	A	0.0679	11	151	0.01292	2.99979e-06	FBgn0011582	DopR	INTRON
3R_6577532_SNP	T	A	A	0.06918	11	148	0.01287	3.03443e-06	FBgn0004841	Takr86C	582 bp UPSTREAM
3R_22884919_SNP	A	T	T	0.05521	9	154	0.01456	3.04866e-06	FBgn0039478	Nep5	INTRON
X_4236727_SNP	A	C	C	0.07229	12	154	0.01233	3.06269e-06	FBgn0262738	norpA	INTRON
3L_8795076_SNP	A	G	G	0.05422	9	157	0.01418	3.09804e-06	FBgn0035929	CG13311	SYNONYMOUS_CODING	FBgn0085455	CG34426	487 bp UPSTREAM
3R_22324728_SNP	A	G	G	0.06707	11	153	0.01268	3.14903e-06	FBgn0039431	CG6490	INTRON
3R_6605526_SNP	T	C	C	0.05988	10	157	0.01349	3.15394e-06	FBgn0037832	Desi	INTRON
3R_6614416_SNP	T	C	C	0.06548	11	157	0.01289	3.18294e-06	FBgn0017577	Mcm5	SYNONYMOUS_CODING	FBgn0037834	Art1	468 bp UPSTREAM
2L_12926674_SNP	G	C	C	0.1006	16	143	0.01043	3.18983e-06	FBgn0040506	ACXE	SYNONYMOUS_CODING
3R_11143474_SNP	G	A	A	0.07927	13	151	0.01156	3.43453e-06	FBgn0038315	CG14866	NON_SYNONYMOUS_CODING	FBgn0038316	CG6276	451 bp DOWNSTREAM
3L_6845082_SNP	A	G	A	0.05917	10	159	0.01328	3.44733e-06	INTERGENIC
2L_2876191_SNP	G	T	T	0.05422	9	157	0.01412	3.5374e-06	FBgn0031478	CG8814	SYNONYMOUS_CODING	FBgn0031479	Prx6005	900 bp DOWNSTREAM
3L_6843542_SNP	A	C	C	0.06627	11	155	0.01266	3.54941e-06	INTERGENIC
3L_7949426_SNP	C	T	T	0.05357	9	159	0.01424	3.6107e-06	INTERGENIC
2L_8391993_SNP	T	C	C	0.07831	13	153	0.01182	3.67046e-06	FBgn0262002	CG42820	SYNONYMOUS_CODING	FBgn0015583	Acp29AB	463 bp DOWNSTREAM
3L_5341351_SNP	C	T	T	0.05063	8	150	0.01487	3.74763e-06	FBgn0016031	lama	INTRON
2R_20094384_SNP	A	C	C	0.07927	13	151	0.01179	3.85406e-06	FBgn0034990	CG11406	INTRON
3R_4787162_DEL	A	AAATTTAGCA	AAATTTAGCA	0.09877	16	146	0.01071	3.85903e-06	FBgn0037645	CG11966	INTRON
2L_4282303_SNP	T	C	C	0.05455	9	156	0.01434	3.92538e-06	FBgn0010473	tutl	845 bp UPSTREAM
X_13921067_SNP	T	C	C	0.07229	12	154	0.01195	3.93717e-06	INTERGENIC
X_13921084_SNP	G	A	A	0.07229	12	154	0.01193	3.94368e-06	INTERGENIC
3R_26174415_SNP	C	G	G	0.08387	13	142	0.01177	4.01776e-06	FBgn0010113	hdc	INTRON
3L_14209105_SNP	A	G	G	0.05917	10	159	0.01332	4.0477e-06	FBgn0013718	nuf	INTRON
3R_25802767_SNP	A	C	C	0.06135	10	153	0.01329	4.0701e-06	INTERGENIC
3L_2602949_SNP	C	T	T	0.07831	13	153	0.01176	4.12496e-06	FBgn0011828	Pxn	MISSENSE
3R_6605107_SNP	C	A	A	0.05389	9	158	0.01401	4.13277e-06	FBgn0037832	Desi	184 bp UPSTREAM
3R_6793334_SNP	C	T	T	0.08383	14	153	0.01125	4.14325e-06	INTERGENIC
3L_5374284_SNP	C	T	T	0.05422	9	157	0.01398	4.19782e-06	FBgn0035604	Ir64a	INTRON
3R_5446570_SNP	C	G	G	0.05488	9	155	0.01381	4.32685e-06	FBgn0037720	CG8312	INTRON
3L_6823350_SNP	T	A	A	0.07738	13	155	0.01165	4.35462e-06	INTERGENIC
3R_6018160_SNP	A	T	T	0.103	17	148	0.01023	4.40692e-06	FBgn0004575	Syn	INTRON
3R_26174416_INS	TCTT	T	T	0.08333	13	143	0.01173	4.40884e-06	FBgn0010113	hdc	INTRON
3R_26174412_SNP	T	C	C	0.08387	13	142	0.01172	4.41974e-06	FBgn0010113	hdc	INTRON
3L_6823620_SNP	T	C	C	0.06587	11	156	0.01267	4.5436e-06	INTERGENIC
X_13921086_SNP	C	T	T	0.07186	12	155	0.01186	4.55398e-06	INTERGENIC
3R_26174409_SNP	C	T	T	0.08333	13	143	0.0117	4.61242e-06	FBgn0010113	hdc	INTRON
3R_24204728_SNP	C	G	C	0.1227	20	143	0.009679	4.63405e-06	INTERGENIC
3R_10659191_SNP	C	G	G	0.06627	11	155	0.01225	4.65017e-06	FBgn0264754	btsz	INTRON
3R_5434271_SNP	T	C	C	0.05455	9	156	0.01404	4.69019e-06	FBgn0037720	CG8312	INTRON
3L_6823814_SNP	A	G	G	0.07229	12	154	0.0121	4.86586e-06	INTERGENIC
3R_6552867_SNP	C	G	G	0.09091	15	150	0.01088	4.92993e-06	INTERGENIC
3L_838092_INS	C	CAAC	C	0.1043	17	146	0.0102	5.15883e-06	FBgn0035165	CG13887	UTR_5_PRIME	FBgn0035164	CG13901	272 bp UPSTREAM
3L_13858095_SNP	A	T	T	0.1341	22	142	0.009094	5.18273e-06	FBgn0036381	CG8745	INTRON
3R_26174414_SNP	T	G	G	0.08553	13	139	0.01166	5.26303e-06	FBgn0010113	hdc	INTRON
2L_8391182_SNP	T	G	T	0.09146	15	149	0.01095	5.32186e-06	FBgn0262002	CG42820	MISSENSE
3L_2603097_SNP	T	C	C	0.07273	12	153	0.01215	5.32669e-06	FBgn0011828	Pxn	SYNONYMOUS_CODING
X_13919808_SNP	C	T	T	0.06667	11	154	0.01238	5.38149e-06	FBgn0011982	tRNA:S7:12Ed	128 bp UPSTREAM	FBgn0011980	tRNA:S774:12Ec	585 bp UPSTREAM
3R_6567934_SNP	G	T	T	0.09146	15	149	0.01107	5.58803e-06	FBgn0004841	Takr86C	INTRON
3R_6556052_SNP	T	G	G	0.08228	13	145	0.01162	5.65834e-06	INTERGENIC
X_13919235_SNP	T	C	C	0.07975	13	150	0.01142	5.85711e-06	FBgn0011980	tRNA:S774:12Ec	12 bp UPSTREAM	FBgn0011982	tRNA:S7:12Ed	364 bp DOWNSTREAM
3L_6823799_SNP	A	G	G	0.07101	12	157	0.01197	5.97967e-06	INTERGENIC
3L_18215904_SNP	A	C	C	0.06024	10	156	0.01298	6.07694e-06	INTERGENIC
3R_5698724_SNP	A	G	G	0.07879	13	152	0.01159	6.12384e-06	INTERGENIC
2L_8371979_SNP	A	G	A	0.3618	55	97	0.006547	6.13302e-06	FBgn0032029	CG17292	INTRON
3L_2603169_SNP	T	C	C	0.08434	14	152	0.01121	6.23598e-06	FBgn0011828	Pxn	SYNONYMOUS_CODING
3R_6799669_SNP	A	C	C	0.08383	14	153	0.01124	6.27347e-06	FBgn0083950	CG34114	INTRON
3R_6799691_SNP	G	A	A	0.08383	14	153	0.01124	6.27347e-06	FBgn0083950	CG34114	INTRON
X_13921068_SNP	G	T	T	0.06667	11	154	0.01215	6.47785e-06	INTERGENIC
3R_6018158_SNP	G	A	A	0.1078	18	149	0.009635	6.51645e-06	FBgn0004575	Syn	INTRON
3R_13846833_SNP	G	A	A	0.08485	14	151	0.01098	6.63761e-06	FBgn0000477	DNaseII	UTR_3_PRIME	FBgn0038564	CG7785	489 bp UPSTREAM
3R_6796081_SNP	G	A	A	0.07143	12	156	0.01195	6.68007e-06	INTERGENIC
3L_2607833_SNP	T	C	C	0.06587	11	156	0.0126	6.89389e-06	FBgn0011828	Pxn	SYNONYMOUS_CODING
3L_6837738_SNP	C	A	A	0.05952	10	158	0.01292	6.92515e-06	INTERGENIC
2L_8379298_SNP	C	G	G	0.06748	11	152	0.01205	6.95193e-06	FBgn0027094	Aats-ala	SYNONYMOUS_CODING
2L_6764834_SNP	T	C	C	0.1098	18	146	0.009782	7.03996e-06	FBgn0031857	CG11321	SYNONYMOUS_CODING
3R_10653148_SNP	T	G	G	0.07362	12	151	0.01158	7.18279e-06	FBgn0264754	btsz	INTRON
3L_6855157_SNP	C	T	C	0.09036	15	151	0.01067	7.35987e-06	INTERGENIC
3R_11249351_SNP	A	T	T	0.0679	11	151	0.01216	7.39663e-06	FBgn0038339	CG6118	INTRON
3R_15191382_SNP	G	T	T	0.09259	15	147	0.01076	7.48471e-06	INTERGENIC
X_13919487_SNP	T	C	C	0.08589	14	149	0.01092	7.49108e-06	FBgn0011982	tRNA:S7:12Ed	112 bp DOWNSTREAM	FBgn0011980	tRNA:S774:12Ec	264 bp UPSTREAM
3L_8795126_SNP	A	C	C	0.05357	9	159	0.01357	7.51522e-06	FBgn0035929	CG13311	NON_SYNONYMOUS_CODING	FBgn0085455	CG34426	437 bp UPSTREAM
3R_1425588_SNP	C	T	T	0.06548	11	157	0.0126	7.56048e-06	FBgn0250753	exba	INTRON
3R_1425598_SNP	A	C	C	0.06548	11	157	0.0126	7.56048e-06	FBgn0250753	exba	INTRON
3R_11143467_SNP	C	T	T	0.08485	14	151	0.01093	7.91559e-06	FBgn0038315	CG14866	SYNONYMOUS_CODING	FBgn0038316	CG6276	458 bp DOWNSTREAM
2L_8363132_SNP	T	G	G	0.1053	16	136	0.01048	7.99454e-06	FBgn0010265	RpS13	567 bp DOWNSTREAM	FBgn0032026	CG7627	685 bp UPSTREAM
2L_17490032_SNP	A	T	T	0.06135	10	153	0.01309	8.08335e-06	FBgn0003187	qua	INTRON
2L_13217331_SNP	A	G	G	0.05625	9	151	0.0136	8.29574e-06	FBgn0032485	CG9426	INTRON
2L_13217316_SNP	G	C	C	0.05806	9	146	0.01361	8.48553e-06	FBgn0032485	CG9426	INTRON
2L_7961663_SNP	C	A	A	0.07092	10	131	0.01312	8.49679e-06	FBgn0085450	Snoo	INTRON
3R_6566749_SNP	A	T	T	0.05521	9	154	0.01367	8.50465e-06	FBgn0004841	Takr86C	INTRON
X_11730281_SNP	C	A	A	0.05096	8	149	0.0145	8.54107e-06	FBgn0262684	CG43154	522 bp DOWNSTREAM
3R_5560905_SNP	G	A	A	0.06135	10	153	0.01293	8.67907e-06	FBgn0037736	CG12950	MISSENSE
3R_25723487_SNP	G	T	T	0.08805	14	145	0.01115	8.86112e-06	FBgn0051038	CG31038	INTRON
2R_2092799_SNP	C	A	A	0.08485	14	151	0.01078	8.9515e-06	FBgn0050431	CG30431	70 bp DOWNSTREAM
2L_7174574_SNP	T	G	T	0.06707	11	153	0.01216	9.04128e-06	INTERGENIC
3R_6576202_SNP	T	G	G	0.4122	61	87	0.006446	9.17096e-06	FBgn0004841	Takr86C	UTR_5_PRIME
3L_6838414_SNP	A	T	T	0.05521	9	154	0.01321	9.25169e-06	INTERGENIC
2R_15853279_SNP	T	C	C	0.05357	9	159	0.01372	9.38504e-06	INTERGENIC
3R_6601184_SNP	C	T	T	0.05389	9	158	0.01351	9.39809e-06	FBgn0020439	fau	INTRON
3R_6593636_SNP	G	C	C	0.05422	9	157	0.01351	9.44671e-06	FBgn0010421	TfIIFbeta	110 bp UPSTREAM	FBgn0020439	fau	252 bp DOWNSTREAM
2R_13353811_SNP	A	T	T	0.06098	10	154	0.01291	9.568e-06	FBgn0034223	Tes	UTR_3_PRIME	FBgn0028953	CG14478	726 bp DOWNSTREAM
2L_8377545_SNP	T	C	C	0.08589	14	149	0.01113	9.62335e-06	FBgn0032032	CG17294	INTRON	FBgn0027094	Aats-ala	717 bp DOWNSTREAM	FBgn0032031	CG13390	748 bp UPSTREAM
2L_8377555_SNP	A	T	T	0.08589	14	149	0.01113	9.62335e-06	FBgn0032032	CG17294	INTRON	FBgn0027094	Aats-ala	707 bp DOWNSTREAM	FBgn0032031	CG13390	758 bp UPSTREAM
3R_25723497_SNP	A	G	G	0.08696	14	147	0.01112	9.67045e-06	FBgn0051038	CG31038	INTRON
X_14068288_SNP	T	A	T	0.09375	15	145	0.01042	9.70125e-06	FBgn0030539	CG1368	501 bp UPSTREAM
3R_1568538_SNP	A	G	G	0.05488	9	155	0.0137	9.76436e-06	FBgn0027497	Madm	UTR_5_PRIME	FBgn0037371	Sym	340 bp UPSTREAM
2R_13335655_SNP	G	C	C	0.05096	8	149	0.01379	9.92048e-06	FBgn0028956	mthl3	383 bp DOWNSTREAM	FBgn0034219	mthl4	667 bp UPSTREAM

## Sheet: F PC 7
Chromosomal Position	Minor Allele	Major Allele	Reference Allele	Minor Allele Frequency	Minor Allele Count	Major Allele Count	Effect Size	P-value	Flybase ID Gene1	Gene Symbol 1	Gene 1 Site Class	Flybase ID Gene 2	Gene Symbol 2	Gene 2 Site Class	Flybase ID Gene 3	Gene Symbol 3	Gene 3 Site Class
3R_4567483_SNP	C	T	T	0.2089	33	125	0.00668	7.10838e-08	FBgn0037623	CG9801	INTRON
3R_4567571_SNP	T	A	A	0.2911	46	112	0.005972	7.13622e-08	FBgn0037623	CG9801	INTRON
3R_4567564_SNP	A	T	T	0.2866	45	112	0.005934	1.11725e-07	FBgn0037623	CG9801	INTRON
3R_26526532_DEL	A	AGACAAAACCTTTGATTTTACA	AGACAAAACCTTTGATTTTACA	0.07738	13	155	-0.009248	4.68463e-07	INTERGENIC
X_12442439_SNP	C	T	T	0.05556	9	153	-0.01105	4.88654e-07	FBgn0264542	CG43921	INTRON
3R_6094882_SNP	T	C	C	0.05389	9	158	-0.01094	5.81152e-07	FBgn0262617	CG43143	INTRON
3R_17521265_DEL	C	CTC	CTC	0.1	16	144	-0.00832	5.89779e-07	FBgn0051176	CG31176	INTRON
3R_5974376_SNP	G	T	T	0.06061	10	155	-0.0103	7.73615e-07	FBgn0086359	Invadolysin	INTRON
3R_6976825_SNP	C	A	A	0.05625	9	151	-0.01081	8.11467e-07	FBgn0040251	Ugt86Di	804 bp DOWNSTREAM
3R_6080248_SNP	A	G	G	0.06024	10	156	-0.01023	9.2981e-07	FBgn0037801	CG3999	SYNONYMOUS_CODING	FBgn0037802	Sirt6	823 bp DOWNSTREAM
2R_12327083_SNP	A	G	G	0.05952	10	158	-0.01023	9.43777e-07	INTERGENIC
2L_11822086_SNP	G	A	A	0.05521	9	154	-0.01063	1.08542e-06	FBgn0264815	Pde1c	INTRON
3R_26525040_SNP	T	C	C	0.07229	12	154	-0.009288	1.09505e-06	INTERGENIC
2R_19473321_SNP	A	C	C	0.05389	9	158	-0.01058	1.21179e-06	FBgn0015903	apt	INTRON
2R_2061837_SNP	C	G	G	0.1227	20	143	-0.007364	1.37271e-06	FBgn0033065	Cyp6w1	MISSENSE
3R_26523137_SNP	A	G	G	0.05389	9	158	-0.01052	1.42232e-06	FBgn0000274	Pka-C2	277 bp UPSTREAM
3R_26522830_SNP	T	C	C	0.05988	10	157	-0.009992	1.51938e-06	FBgn0000274	Pka-C2	UTR_5_PRIME
3L_3584848_SNP	A	T	T	0.05917	10	159	-0.01005	1.57291e-06	FBgn0005640	Eip63E	INTRON
3R_26526811_SNP	G	A	A	0.07738	13	155	-0.008814	1.76602e-06	INTERGENIC
X_14998231_SNP	G	C	C	0.1369	23	145	-0.006857	1.87668e-06	FBgn0030613	rab3-GEF	INTRON
2L_12557041_SNP	C	T	T	0.1018	17	150	-0.007791	2.13176e-06	INTERGENIC
2R_12328786_SNP	G	T	T	0.06024	10	156	-0.009871	2.20851e-06	INTERGENIC
3R_26525091_INS	ACATACAAA	A	A	0.08333	14	154	-0.008407	2.27701e-06	INTERGENIC
3R_26525127_SNP	T	C	C	0.08333	14	154	-0.008407	2.27701e-06	INTERGENIC
3R_26525627_SNP	G	T	T	0.08333	14	154	-0.008407	2.27701e-06	INTERGENIC
3R_26526558_SNP	G	C	C	0.08284	14	155	-0.008381	2.4449e-06	INTERGENIC
3R_26526788_SNP	T	C	C	0.07186	12	155	-0.00902	2.54737e-06	INTERGENIC
3R_26524748_SNP	C	G	G	0.08485	14	151	-0.008367	2.59889e-06	INTERGENIC
3R_26525084_SNP	G	C	C	0.07784	13	154	-0.00865	2.60658e-06	INTERGENIC
3L_3082910_SNP	T	C	C	0.07831	13	153	-0.008677	2.86775e-06	FBgn0035397	CG11486	INTRON
3R_26525090_SNP	T	C	C	0.07831	13	153	-0.008615	2.89642e-06	INTERGENIC
2R_2061326_SNP	G	T	T	0.1187	19	141	-0.00734	2.97875e-06	FBgn0033065	Cyp6w1	MISSENSE
2R_12327156_SNP	G	T	T	0.05389	9	158	-0.01027	3.06485e-06	INTERGENIC
2L_14546559_SNP	T	C	C	0.07362	12	151	-0.008996	3.11301e-06	FBgn0250844	CG4218	961 bp DOWNSTREAM
3L_10169078_SNP	A	C	C	0.1006	16	143	-0.007871	3.22548e-06	FBgn0052057	dpr10	INTRON
X_14989355_SNP	C	A	A	0.1446	24	142	-0.006574	3.25773e-06	FBgn0030613	rab3-GEF	INTRON	FBgn0030614	CG9072	136 bp DOWNSTREAM
3R_6093076_SNP	A	C	C	0.0559	9	152	-0.01024	3.36018e-06	FBgn0262617	CG43143	INTRON
2R_12420615_SNP	C	A	A	0.2346	38	124	-0.005507	3.60598e-06	FBgn0011260	Sema-2a	UTR_3_PRIME
2R_18177517_SNP	T	G	G	0.05952	10	158	-0.009674	3.70191e-06	INTERGENIC
3L_3082078_SNP	C	A	A	0.08383	14	153	-0.008285	3.92576e-06	FBgn0035397	CG11486	INTRON
3R_6089785_SNP	C	T	T	0.05455	9	156	-0.01014	3.9919e-06	FBgn0040078	pont	164 bp DOWNSTREAM	FBgn0262617	CG43143	243 bp UPSTREAM
3R_17521291_SNP	C	T	T	0.1049	17	145	-0.007511	4.03298e-06	FBgn0051176	CG31176	INTRON
3R_17521228_SNP	A	T	T	0.1013	16	142	-0.007711	4.26292e-06	FBgn0051176	CG31176	INTRON
2R_19469047_SNP	A	G	G	0.08333	14	154	-0.008205	4.31894e-06	FBgn0015903	apt	INTRON
2L_3803461_SNP	T	G	G	0.07831	13	153	-0.008486	5.05349e-06	FBgn0021800	Reph	84 bp UPSTREAM	FBgn0031571	CG3921	952 bp DOWNSTREAM
2L_2274067_SNP	T	C	C	0.07285	11	140	-0.009109	5.13151e-06	FBgn0264084	CR43753	INTRON
3R_6053527_SNP	T	A	A	0.2453	39	120	-0.005406	5.15569e-06	FBgn0261928	CG42795	INTRON
X_14988795_SNP	T	A	A	0.1607	27	141	-0.006132	5.35783e-06	FBgn0030613	rab3-GEF	SYNONYMOUS_CODING	FBgn0030614	CG9072	696 bp DOWNSTREAM
3R_6097864_SNP	G	A	A	0.05625	9	151	-0.01004	5.47848e-06	FBgn0262617	CG43143	INTRON
3R_6078375_SNP	A	G	G	0.05988	10	157	-0.009523	5.5284e-06	FBgn0037801	CG3999	MISSENSE
3R_6053452_SNP	A	G	G	0.2038	32	125	-0.005782	5.86306e-06	FBgn0261928	CG42795	INTRON
3R_6053487_SNP	G	A	A	0.2067	31	119	-0.005883	5.97166e-06	FBgn0261928	CG42795	INTRON
2L_7768100_SNP	T	A	A	0.07051	11	145	-0.009038	6.14617e-06	FBgn0031945	CG7191	INTRON
3R_7098803_SNP	A	C	C	0.1615	26	135	-0.006237	6.42542e-06	FBgn0051386	CR31386	INTRON
X_14993053_SNP	T	C	C	0.1394	23	142	-0.00653	6.4285e-06	FBgn0030613	rab3-GEF	SYNONYMOUS_CODING
2R_3712385_SNP	A	G	G	0.05325	9	160	-0.009888	6.5327e-06	FBgn0050383	CG30383	SYNONYMOUS_CODING	FBgn0003082	phr	409 bp UPSTREAM
2R_3712418_SNP	C	T	T	0.05325	9	160	-0.009888	6.5327e-06	FBgn0050383	CG30383	NON_SYNONYMOUS_CODING	FBgn0003082	phr	376 bp UPSTREAM
2R_3713564_SNP	T	A	A	0.05325	9	160	-0.009888	6.5327e-06	FBgn0003082	phr	NON_SYNONYMOUS_CODING	FBgn0050383	CG30383	918 bp UPSTREAM
X_14989356_SNP	A	C	C	0.1607	27	141	-0.006067	6.84261e-06	FBgn0030613	rab3-GEF	INTRON	FBgn0030614	CG9072	135 bp DOWNSTREAM
3L_3486934_SNP	A	G	A	0.1146	18	139	-0.007259	6.85816e-06	FBgn0259224	CG42324	INTRON
X_14988729_SNP	G	A	A	0.1607	27	141	-0.006056	7.12346e-06	FBgn0030613	rab3-GEF	SYNONYMOUS_CODING	FBgn0030614	CG9072	762 bp DOWNSTREAM
X_20848468_SNP	G	A	A	0.05357	9	159	-0.009891	7.19554e-06	INTERGENIC
2R_3711553_SNP	A	C	C	0.05422	9	157	-0.009843	7.33116e-06	FBgn0050383	CG30383	UTR_3_PRIME	FBgn0029093	cathD	479 bp UPSTREAM
3R_6077027_SNP	A	T	T	0.08333	13	143	-0.008285	7.89795e-06	FBgn0261928	CG42795	28 bp DOWNSTREAM	FBgn0037801	CG3999	213 bp UPSTREAM
3R_26526416_SNP	T	C	C	0.09091	15	150	-0.007746	7.95339e-06	INTERGENIC
3R_6049011_SNP	C	T	T	0.2484	38	115	-0.005375	8.02397e-06	FBgn0037797	CG12420	SYNONYMOUS_CODING	FBgn0037798	CG12817	151 bp DOWNSTREAM	FBgn0004575	Syn	847 bp DOWNSTREAM
3R_5963833_SNP	T	A	A	0.05455	9	156	-0.009819	8.22853e-06	FBgn0004889	tws	INTRON
3R_6048867_SNP	A	T	T	0.242	38	119	-0.005328	8.31334e-06	FBgn0037797	CG12420	SYNONYMOUS_CODING	FBgn0037798	CG12817	295 bp DOWNSTREAM	FBgn0004575	Syn	703 bp DOWNSTREAM
3R_6053566_SNP	T	C	C	0.242	38	119	-0.005345	8.46926e-06	FBgn0261928	CG42795	INTRON
X_14989292_SNP	T	A	A	0.1615	26	135	-0.006119	8.65858e-06	FBgn0030613	rab3-GEF	INTRON	FBgn0030614	CG9072	199 bp DOWNSTREAM
3R_6099893_SNP	A	G	G	0.05988	10	157	-0.009352	8.68539e-06	FBgn0262617	CG43143	INTRON
3L_12577942_SNP	A	C	C	0.06061	10	155	-0.00935	8.90238e-06	FBgn0015904	ara	INTRON
3L_2397202_SNP	A	T	T	0.05389	9	158	-0.009812	9.40963e-06	FBgn0035338	CG13800	INTRON	FBgn0261551	CG42669	INTRON
2R_20187391_SNP	G	C	C	0.07229	12	154	-0.00855	9.52172e-06	INTERGENIC
3R_7100702_SNP	T	C	C	0.1634	25	128	-0.006261	9.65871e-06	FBgn0051386	CR31386	INTRON
2L_14562910_INS	T	TGCCATAT	T	0.05333	8	142	-0.01032	9.79303e-06	FBgn0028913	CG3473	161 bp DOWNSTREAM

## Sheet: M PC 1
Chromosomal Position	Minor Allele	Major Allele	Reference Allele	Minor Allele Frequency	Minor Allele Count	Major Allele Count	Effect Size	P-value	Flybase ID Gene1	Gene Symbol 1	Gene 1 Site Class	Flybase ID Gene 2	Gene Symbol 2	Gene 2 Site Class	Flybase ID Gene 3	Gene Symbol 3	Gene 3 Site Class
2L_8521314_SNP	C	G	G	0.2148	32	117	0.07063	2.18894e-11	FBgn0032055	CG13091	NON_SYNONYMOUS_CODING	FBgn0016122	Acer	619 bp UPSTREAM
2L_8521447_SNP	T	C	C	0.2245	33	114	0.0693	3.6517e-11	FBgn0032055	CG13091	INTRON	FBgn0016122	Acer	486 bp UPSTREAM
2L_8525014_SNP	A	T	A	0.2183	31	111	0.07053	5.97857e-11	FBgn0016122	Acer	130 bp DOWNSTREAM	FBgn0250903	lmgA	539 bp DOWNSTREAM	FBgn0085470	lmgB	539 bp DOWNSTREAM
2L_8521332_SNP	C	A	A	0.2192	32	114	0.06856	1.1372e-10	FBgn0032055	CG13091	SYNONYMOUS_CODING	FBgn0016122	Acer	601 bp UPSTREAM
2L_8525183_SNP	T	G	G	0.125	19	133	0.08386	1.27388e-10	FBgn0016122	Acer	299 bp DOWNSTREAM	FBgn0250903	lmgA	370 bp DOWNSTREAM	FBgn0085470	lmgB	370 bp DOWNSTREAM
2L_8520294_SNP	A	G	G	0.2313	34	113	0.06679	1.36164e-10	FBgn0032055	CG13091	SYNONYMOUS_CODING
2L_8528842_SNP	G	T	T	0.2329	34	112	0.06574	3.02165e-10	FBgn0028394	CG17834	299 bp UPSTREAM	FBgn0250903	lmgA	337 bp UPSTREAM	FBgn0085470	lmgB	337 bp UPSTREAM
2L_8520050_SNP	C	T	T	0.2207	32	113	0.06692	3.73261e-10	FBgn0032055	CG13091	INTRON	FBgn0032054	CG13090	874 bp DOWNSTREAM
2L_8528886_SNP	C	T	T	0.1575	23	123	0.07561	4.4967e-10	FBgn0028394	CG17834	255 bp UPSTREAM	FBgn0250903	lmgA	381 bp UPSTREAM	FBgn0085470	lmgB	381 bp UPSTREAM
2L_8524906_SNP	C	A	C	0.2329	34	112	0.06455	6.89485e-10	FBgn0016122	Acer	22 bp DOWNSTREAM	FBgn0250903	lmgA	93 bp DOWNSTREAM	FBgn0085470	lmgB	93 bp DOWNSTREAM
2L_8521633_SNP	A	G	G	0.1818	26	117	0.07064	1.1521e-09	FBgn0032055	CG13091	UTR_3_PRIME	FBgn0016122	Acer	300 bp UPSTREAM
2L_8523762_SNP	G	T	G	0.2381	35	112	0.06287	1.3356e-09	FBgn0016122	Acer	SYNONYMOUS_CODING
2L_8528721_SNP	G	A	A	0.1986	29	117	0.0671	1.56395e-09	FBgn0250903	lmgA	216 bp UPSTREAM	FBgn0085470	lmgB	216 bp UPSTREAM	FBgn0028394	CG17834	420 bp UPSTREAM
2L_8524323_SNP	C	T	T	0.2215	33	116	0.06292	2.80141e-09	FBgn0016122	Acer	SYNONYMOUS_CODING	FBgn0250903	lmgA	676 bp DOWNSTREAM	FBgn0085470	lmgB	676 bp DOWNSTREAM
2L_8520273_SNP	C	T	T	0.2292	33	111	0.06294	3.3831e-09	FBgn0032055	CG13091	SYNONYMOUS_CODING
2L_8524326_SNP	T	C	C	0.2014	29	115	0.06579	3.76948e-09	FBgn0016122	Acer	SYNONYMOUS_CODING	FBgn0250903	lmgA	673 bp DOWNSTREAM	FBgn0085470	lmgB	673 bp DOWNSTREAM
2L_8520157_SNP	A	C	C	0.2109	31	116	0.06329	5.87644e-09	FBgn0032055	CG13091	NON_SYNONYMOUS_CODING	FBgn0032054	CG13090	981 bp DOWNSTREAM
2L_8523105_SNP	C	G	G	0.0915	14	139	0.08775	5.94828e-09	FBgn0016122	Acer	INTRON
2L_8523133_SNP	A	G	G	0.0915	14	139	0.08775	5.94828e-09	FBgn0016122	Acer	INTRON
2L_8526126_SNP	G	T	T	0.1208	18	131	0.0786	6.13656e-09	FBgn0016122	Acer	386 bp DOWNSTREAM	FBgn0250903	lmgA	479 bp DOWNSTREAM	FBgn0085470	lmgB	479 bp DOWNSTREAM
2L_8530244_SNP	A	G	G	0.1419	21	127	0.07355	6.52237e-09	FBgn0028394	CG17834	INTRON
2L_8528865_SNP	T	C	C	0.2313	34	113	0.06107	6.53322e-09	FBgn0028394	CG17834	276 bp UPSTREAM	FBgn0250903	lmgA	360 bp UPSTREAM	FBgn0085470	lmgB	360 bp UPSTREAM
2L_8528881_SNP	G	A	A	0.2313	34	113	0.06107	6.53322e-09	FBgn0028394	CG17834	260 bp UPSTREAM	FBgn0250903	lmgA	376 bp UPSTREAM	FBgn0085470	lmgB	376 bp UPSTREAM
2L_8524089_SNP	A	G	G	0.18	27	123	0.06633	6.59422e-09	FBgn0016122	Acer	SYNONYMOUS_CODING	FBgn0250903	lmgA	910 bp DOWNSTREAM	FBgn0085470	lmgB	910 bp DOWNSTREAM
2L_8520129_SNP	G	C	C	0.2207	32	113	0.06216	8.15401e-09	FBgn0032055	CG13091	SYNONYMOUS_CODING	FBgn0032054	CG13090	953 bp DOWNSTREAM
2L_8530229_SNP	A	G	G	0.1656	25	126	0.06739	1.11891e-08	FBgn0028394	CG17834	INTRON
2L_8523852_SNP	C	G	C	0.1918	28	118	0.06453	1.23789e-08	FBgn0016122	Acer	MISSENSE
2L_8528825_SNP	T	C	C	0.2365	35	113	0.05934	1.27101e-08	FBgn0028394	CG17834	316 bp UPSTREAM	FBgn0250903	lmgA	320 bp UPSTREAM	FBgn0085470	lmgB	320 bp UPSTREAM
2L_8528818_SNP	C	A	A	0.2381	35	112	0.05937	1.29487e-08	FBgn0250903	lmgA	313 bp UPSTREAM	FBgn0085470	lmgB	313 bp UPSTREAM	FBgn0028394	CG17834	323 bp UPSTREAM
2L_8523948_SNP	G	C	G	0.1689	25	123	0.06705	1.45573e-08	FBgn0016122	Acer	SYNONYMOUS_CODING
2L_8525348_SNP	A	T	T	0.08219	12	134	0.09129	2.00059e-08	FBgn0250903	lmgA	205 bp DOWNSTREAM	FBgn0085470	lmgB	205 bp DOWNSTREAM	FBgn0016122	Acer	464 bp DOWNSTREAM
2L_8529077_SNP	C	G	G	0.2397	35	111	0.05872	2.00616e-08	FBgn0028394	CG17834	64 bp UPSTREAM	FBgn0250903	lmgA	572 bp UPSTREAM	FBgn0085470	lmgB	572 bp UPSTREAM
2L_8539516_SNP	T	C	C	0.0596	9	142	0.1032	2.73574e-08	FBgn0028394	CG17834	INTRON
2L_8529069_SNP	C	T	T	0.2466	36	110	0.05756	2.9044e-08	FBgn0028394	CG17834	72 bp UPSTREAM	FBgn0250903	lmgA	564 bp UPSTREAM	FBgn0085470	lmgB	564 bp UPSTREAM
2L_8530270_SNP	A	C	C	0.1342	20	129	0.0717	3.42417e-08	FBgn0028394	CG17834	INTRON
2L_8522458_SNP	C	T	T	0.1644	24	122	0.06637	3.90961e-08	FBgn0016122	Acer	SYNONYMOUS_CODING	FBgn0032055	CG13091	649 bp DOWNSTREAM
2L_8522486_SNP	C	T	T	0.1507	22	124	0.06821	5.14667e-08	FBgn0016122	Acer	SYNONYMOUS_CODING	FBgn0032055	CG13091	677 bp DOWNSTREAM
2L_8525341_SNP	A	C	C	0.09868	15	137	0.07954	6.75241e-08	FBgn0250903	lmgA	212 bp DOWNSTREAM	FBgn0085470	lmgB	212 bp DOWNSTREAM	FBgn0016122	Acer	457 bp DOWNSTREAM
2L_8521004_SNP	A	C	C	0.3586	52	93	0.0505	7.3906e-08	FBgn0032055	CG13091	NON_SYNONYMOUS_CODING	FBgn0016122	Acer	929 bp UPSTREAM
2L_8528846_SNP	A	T	T	0.226	33	113	0.05761	7.79629e-08	FBgn0028394	CG17834	295 bp UPSTREAM	FBgn0250903	lmgA	341 bp UPSTREAM	FBgn0085470	lmgB	341 bp UPSTREAM
2L_8529062_SNP	T	C	C	0.2466	36	110	0.05584	8.13317e-08	FBgn0028394	CG17834	79 bp UPSTREAM	FBgn0250903	lmgA	557 bp UPSTREAM	FBgn0085470	lmgB	557 bp UPSTREAM
2L_8524383_SNP	C	T	C	0.1678	25	124	0.06353	9.09716e-08	FBgn0016122	Acer	SYNONYMOUS_CODING	FBgn0250903	lmgA	616 bp DOWNSTREAM	FBgn0085470	lmgB	616 bp DOWNSTREAM
2L_8524455_SNP	C	T	T	0.2153	31	113	0.05868	9.45964e-08	FBgn0016122	Acer	SYNONYMOUS_CODING	FBgn0250903	lmgA	544 bp DOWNSTREAM	FBgn0085470	lmgB	544 bp DOWNSTREAM
2L_8525344_SNP	A	G	G	0.09396	14	135	0.08109	1.01399e-07	FBgn0250903	lmgA	209 bp DOWNSTREAM	FBgn0085470	lmgB	209 bp DOWNSTREAM	FBgn0016122	Acer	460 bp DOWNSTREAM
2L_8525346_SNP	T	C	C	0.09396	14	135	0.08109	1.01399e-07	FBgn0250903	lmgA	207 bp DOWNSTREAM	FBgn0085470	lmgB	207 bp DOWNSTREAM	FBgn0016122	Acer	462 bp DOWNSTREAM
2L_8527696_SNP	T	C	C	0.2055	30	116	0.05889	1.17481e-07	FBgn0085470	lmgB	SYNONYMOUS_CODING	FBgn0250903	lmgA	300 bp DOWNSTREAM
2L_8525339_SNP	A	G	G	0.1046	16	137	0.07568	1.31396e-07	FBgn0250903	lmgA	214 bp DOWNSTREAM	FBgn0085470	lmgB	214 bp DOWNSTREAM	FBgn0016122	Acer	455 bp DOWNSTREAM
2L_8531564_SNP	G	A	A	0.05298	8	143	0.1041	1.32014e-07	FBgn0028394	CG17834	INTRON
2L_8525349_SNP	T	C	C	0.09524	14	133	0.08041	1.35804e-07	FBgn0250903	lmgA	204 bp DOWNSTREAM	FBgn0085470	lmgB	204 bp DOWNSTREAM	FBgn0016122	Acer	465 bp DOWNSTREAM
2L_8524431_SNP	A	T	A	0.2381	35	112	0.05497	1.74679e-07	FBgn0016122	Acer	SYNONYMOUS_CODING	FBgn0250903	lmgA	568 bp DOWNSTREAM	FBgn0085470	lmgB	568 bp DOWNSTREAM
2L_8523873_SNP	A	C	A	0.1497	22	125	0.06281	6.3467e-07	FBgn0016122	Acer	SYNONYMOUS_CODING
2L_8517836_SNP	G	A	A	0.2292	33	111	0.05375	6.7251e-07	FBgn0032054	CG13090	NON_SYNONYMOUS_CODING	FBgn0032053	mRpL51	456 bp UPSTREAM
2L_8524462_SNP	T	C	C	0.1507	22	124	0.06264	6.94617e-07	FBgn0016122	Acer	SYNONYMOUS_CODING	FBgn0250903	lmgA	537 bp DOWNSTREAM	FBgn0085470	lmgB	537 bp DOWNSTREAM
2L_8529111_SNP	G	A	A	0.2345	34	111	0.05267	8.57446e-07	FBgn0028394	CG17834	UPSTREAM	FBgn0250903	lmgA	606 bp UPSTREAM	FBgn0085470	lmgB	606 bp UPSTREAM
2L_8527621_SNP	C	T	T	0.1944	28	116	0.05656	8.62994e-07	FBgn0085470	lmgB	SYNONYMOUS_CODING	FBgn0250903	lmgA	375 bp DOWNSTREAM
3L_8288353_SNP	A	T	T	0.05844	9	145	0.09183	9.84996e-07	FBgn0035865	CG7201	UTR_5_PRIME
2L_8515482_SNP	T	C	C	0.2081	31	118	0.05349	1.23692e-06	FBgn0032052	CG13089	SYNONYMOUS_CODING	FBgn0032051	CG13097	614 bp UPSTREAM
2L_8529738_SNP	C	A	A	0.3562	52	94	0.04566	1.34724e-06	FBgn0028394	CG17834	INTRON
2L_8524563_SNP	T	G	G	0.137	20	126	0.06323	1.56248e-06	FBgn0016122	Acer	NON_SYNONYMOUS_CODING	FBgn0250903	lmgA	436 bp DOWNSTREAM	FBgn0085470	lmgB	436 bp DOWNSTREAM
2L_3085304_SNP	G	A	A	0.295	41	98	0.04871	1.68794e-06	FBgn0015600	toc	INTRON
3R_21429529_SNP	C	A	A	0.07483	11	136	0.08193	1.77973e-06	FBgn0011666	msi	UTR_3_PRIME	FBgn0261287	ymp	INTRON
2R_13405958_SNP	G	T	T	0.05161	8	147	0.09304	2.90642e-06	FBgn0034232	CG4866	INTRON	FBgn0034231	Apc10	270 bp UPSTREAM	FBgn0263197	Patronin	571 bp DOWNSTREAM
2L_8530204_SNP	T	A	A	0.07843	12	141	0.07675	3.21389e-06	FBgn0028394	CG17834	INTRON
2L_8529275_SNP	G	A	A	0.2649	40	111	0.04663	4.02448e-06	FBgn0028394	CG17834	UTR_5_PRIME	FBgn0250903	lmgA	770 bp UPSTREAM	FBgn0085470	lmgB	770 bp UPSTREAM
3L_14160357_SNP	C	T	T	0.07285	11	140	0.07912	4.09422e-06	INTERGENIC
3L_3255154_INS	CCC	C	C	0.1419	22	133	0.05802	4.32065e-06	INTERGENIC
2L_8515461_SNP	C	T	T	0.2394	34	108	0.0495	4.47919e-06	FBgn0032052	CG13089	SYNONYMOUS_CODING	FBgn0032051	CG13097	593 bp UPSTREAM
2L_8529270_SNP	A	C	C	0.2568	38	110	0.04727	4.69855e-06	FBgn0028394	CG17834	UTR_5_PRIME	FBgn0250903	lmgA	765 bp UPSTREAM	FBgn0085470	lmgB	765 bp UPSTREAM
2L_4312483_SNP	T	C	C	0.05634	8	134	0.09124	4.91717e-06	FBgn0010473	tutl	INTRON
3L_22688323_SNP	T	C	C	0.1824	27	121	-0.05326	5.13053e-06	FBgn0037179	CG14453	575 bp DOWNSTREAM	FBgn0037180	CG14452	730 bp UPSTREAM
2L_8508450_SNP	A	C	A	0.3819	55	89	-0.0428	5.48942e-06	FBgn0032050	CG13096	801 bp DOWNSTREAM
2L_18865948_SNP	G	A	A	0.05229	8	145	0.09046	5.7081e-06	FBgn0003896	tup	INTRON
2R_6229818_SNP	T	A	T	0.4797	71	77	-0.04093	5.88741e-06	FBgn0261698	CG42732	INTRON
2L_8508476_INS	T	TGCATAT	T	0.3984	51	77	-0.04491	5.89192e-06	FBgn0032050	CG13096	774 bp DOWNSTREAM
2L_8523537_SNP	C	A	C	0.4266	61	82	0.042	6.08488e-06	FBgn0016122	Acer	MISSENSE
3L_4142811_SNP	G	T	T	0.0641	10	146	0.08116	6.15097e-06	FBgn0052260	CG32260	INTRON	FBgn0004552	Akh	741 bp DOWNSTREAM
2R_6082595_SNP	C	T	T	0.4533	68	82	-0.04072	6.16604e-06	INTERGENIC
2L_8530374_SNP	C	T	T	0.2041	30	117	0.05078	6.23006e-06	FBgn0028394	CG17834	INTRON
2R_6082598_SNP	T	G	G	0.4503	68	83	-0.04058	6.26662e-06	INTERGENIC
2R_6082599_SNP	T	A	A	0.457	69	82	-0.04041	6.67647e-06	INTERGENIC
2L_8523117_SNP	G	A	A	0.125	19	133	0.06066	6.70006e-06	FBgn0016122	Acer	INTRON
2L_8520814_SNP	G	A	A	0.07895	12	140	0.07429	6.9249e-06	FBgn0032055	CG13091	MISSENSE
3L_4143536_SNP	A	G	G	0.05921	9	143	0.08487	6.93528e-06	FBgn0052260	CG32260	INTRON
2L_8515600_SNP	C	T	T	0.2414	35	110	0.04774	7.59563e-06	FBgn0032052	CG13089	NON_SYNONYMOUS_CODING	FBgn0032051	CG13097	732 bp UPSTREAM
2L_8540420_SNP	A	G	A	0.3191	45	96	0.04438	7.80447e-06	FBgn0028394	CG17834	INTRON
2R_13184419_INS	G	GG	G	0.4483	65	80	-0.041	7.88899e-06	FBgn0261642	mbl	INTRON
2L_9388639_SNP	C	T	T	0.05405	8	140	0.08915	8.11749e-06	FBgn0085395	Shawl	INTRON	FBgn0012036	Aldh	INTRON
2L_8528806_SNP	C	A	A	0.2057	29	112	0.05105	8.29783e-06	FBgn0250903	lmgA	301 bp UPSTREAM	FBgn0085470	lmgB	301 bp UPSTREAM	FBgn0028394	CG17834	335 bp UPSTREAM
3R_26943105_SNP	G	A	A	0.1484	23	132	-0.05527	8.57726e-06	INTERGENIC
2L_8529262_SNP	C	T	T	0.3245	49	102	0.04251	8.6094e-06	FBgn0028394	CG17834	UTR_5_PRIME	FBgn0250903	lmgA	757 bp UPSTREAM	FBgn0085470	lmgB	757 bp UPSTREAM
2L_8529353_DEL	A	ATAAAAA	ATAAAAA	0.2877	42	104	0.04461	9.09306e-06	FBgn0028394	CG17834	UTR_5_PRIME	FBgn0250903	lmgA	849 bp UPSTREAM	FBgn0085470	lmgB	849 bp UPSTREAM
3L_4144192_SNP	C	A	A	0.07692	12	144	0.07313	9.58551e-06	FBgn0052260	CG32260	INTRON
2L_15567605_SNP	T	G	G	0.1556	21	114	0.05777	9.70229e-06	FBgn0028370	kek3	INTRON
2L_8513188_SNP	G	A	A	0.25	36	108	0.04681	9.73889e-06	FBgn0032051	CG13097	SYNONYMOUS_CODING

## Sheet: M PC 2
Chromosomal Position	Minor Allele	Major Allele	Reference Allele	Minor Allele Frequency	Minor Allele Count	Major Allele Count	Effect Size	P-value	Flybase ID Gene1	Gene Symbol 1	Gene 1 Site Class	Flybase ID Gene 2	Gene Symbol 2	Gene 2 Site Class
3L_17166952_INS	ACA	C	C	0.06579	10	142	0.04819	2.46176e-08	FBgn0260943	Rbp6	INTRON
3L_16762783_SNP	T	A	A	0.05128	8	148	0.05083	1.33546e-07	FBgn0004108	Nrt	INTRON
3L_16762658_SNP	G	T	T	0.05128	8	148	0.0507	1.44103e-07	FBgn0004108	Nrt	INTRON
3R_25522548_DEL	T	TT	TT	0.05844	9	145	0.04698	2.74227e-07	FBgn0039683	dmrt99B	UTR_3_PRIME
3R_10960865_SNP	G	A	A	0.1212	16	116	0.03615	3.57475e-07	FBgn0038290	CG6912	UTR_3_PRIME
X_4258820_SNP	T	G	G	0.08511	12	129	0.04055	4.61975e-07	FBgn0262738	norpA	UTR_3_PRIME
3L_3325869_SNP	T	C	C	0.07097	11	144	0.04113	8.41269e-07	FBgn0035437	CG11526	INTRON	FBgn0035438	PHGPx	396 bp UPSTREAM
3L_19358322_DEL	A	AACAAGAAA	AACAAGAAA	0.07383	11	138	0.0407	1.16638e-06	FBgn0052206	CG32206	INTRON
3L_22351195_DEL	A	CAATCCTC	CAATCCTC	0.07285	11	140	0.0405	1.31322e-06	FBgn0004449	Ten-m	INTRON
X_6471430_DEL	A	AC	AC	0.05161	8	147	0.0469	1.35232e-06	FBgn0085446	CG34417	INTRON
3L_3499429_DEL	C	CA	CA	0.1234	19	135	0.03153	1.49602e-06	FBgn0259224	CG42324	INTRON
3L_4889607_SNP	G	A	G	0.4248	65	88	0.02092	1.73658e-06	FBgn0035581	CG17150	INTRON
3L_17166774_SNP	A	T	T	0.09722	14	130	0.0358	1.98386e-06	FBgn0260943	Rbp6	INTRON
X_20869168_SNP	T	A	A	0.1212	16	116	0.03387	2.08612e-06	INTERGENIC
2L_7220993_SNP	A	G	G	0.09396	14	135	0.0356	2.17655e-06	FBgn0263133	ico	SYNONYMOUS_CODING	FBgn0031897	CG13784	964 bp UPSTREAM
3L_3499164_SNP	T	G	G	0.1176	18	135	0.03179	2.23027e-06	FBgn0259224	CG42324	INTRON
3L_17166943_SNP	T	A	A	0.09333	14	136	0.03511	3.05828e-06	FBgn0260943	Rbp6	INTRON
3L_17166946_INS	TTTAAA	T	T	0.09211	14	138	0.03505	3.1203e-06	FBgn0260943	Rbp6	INTRON
3L_17166939_SNP	T	A	A	0.09272	14	137	0.035	3.2513e-06	FBgn0260943	Rbp6	INTRON
3L_4889602_INS	G	GG	G	0.4333	65	85	0.02051	3.41418e-06	FBgn0035581	CG17150	INTRON
3R_14501574_SNP	A	C	C	0.0974	15	139	0.03372	3.72037e-06	FBgn0038639	CG7705	SYNONYMOUS_CODING
X_8899857_DEL	T	TGATG	TGATG	0.05344	7	124	0.04816	3.78034e-06	FBgn0264384	CR43836	INTRON	FBgn0261549	rdgA	INTRON
3L_12254655_SNP	G	C	G	0.1645	25	127	0.02711	3.84273e-06	FBgn0260941	app	INTRON
3L_15569462_SNP	A	G	G	0.07143	11	143	0.0387	3.99785e-06	FBgn0036511	CG6498	49 bp DOWNSTREAM	FBgn0036512	CG16979	208 bp UPSTREAM
3L_4889635_SNP	G	A	G	0.4248	65	88	0.02003	5.01402e-06	FBgn0035581	CG17150	SYNONYMOUS_CODING
3L_20406078_SNP	G	A	A	0.1678	24	119	0.02737	5.18762e-06	FBgn0036985	zye	626 bp UPSTREAM
2L_1696470_SNP	A	C	C	0.08219	12	134	0.03681	5.36079e-06	FBgn0086758	chinmo	SYNONYMOUS_CODING
2R_12788772_SNP	T	A	A	0.08442	13	141	0.03537	5.49157e-06	FBgn0004784	inaC	INTRON
3L_1586811_SNP	T	A	A	0.05769	9	147	0.04188	5.5639e-06	FBgn0035237	CG13917	INTRON
3L_14445364_SNP	C	T	T	0.05128	8	148	0.04422	5.68747e-06	FBgn0087007	bbg	INTRON
3L_4889562_SNP	A	T	A	0.4221	65	89	0.01967	7.26599e-06	FBgn0035581	CG17150	INTRON
X_19649705_SNP	G	A	A	0.08333	13	143	0.03487	7.48701e-06	FBgn0031069	Pmp70	INTRON
3L_17168114_SNP	A	C	C	0.09868	15	137	0.03271	7.64435e-06	FBgn0260943	Rbp6	INTRON
3L_14447335_SNP	T	G	G	0.07285	11	140	0.0376	7.90694e-06	FBgn0087007	bbg	INTRON
3L_3500997_SNP	A	T	T	0.05195	8	146	0.04359	7.94677e-06	FBgn0259224	CG42324	INTRON
2R_12788764_SNP	A	T	T	0.08442	13	141	0.03478	8.02886e-06	FBgn0004784	inaC	INTRON
3L_17166917_SNP	A	T	T	0.09211	14	138	0.03365	8.07188e-06	FBgn0260943	Rbp6	INTRON
3L_18920248_SNP	C	T	T	0.05298	8	143	0.04352	8.32172e-06	FBgn0052204	CG32204	INTRON
3L_4889577_SNP	A	T	A	0.4286	66	88	0.01949	8.4606e-06	FBgn0035581	CG17150	INTRON
3R_21203421_SNP	C	A	A	0.1233	18	128	0.03	9.31892e-06	FBgn0004509	Fur1	INTRON
3L_15571994_SNP	G	A	A	0.08333	13	143	0.03443	9.92203e-06	FBgn0261109	mrn	UTR_3_PRIME	FBgn0036512	CG16979	220 bp DOWNSTREAM

## Sheet: M PC 3
Chromosomal Position	Minor Allele	Major Allele	Reference Allele	Minor Allele Frequency	Minor Allele Count	Major Allele Count	Effect Size	P-value	Flybase ID Gene1	Gene Symbol 1	Gene 1 Site Class	Flybase ID Gene 2	Gene Symbol 2	Gene 2 Site Class	Flybase ID Gene 3	Gene Symbol 3	Gene 3 Site Class
2R_14629596_SNP	A	T	T	0.05161	8	147	0.02973	5.16694e-09	FBgn0053147	Hs3st-A	INTRON	FBgn0034382	CG18609	426 bp DOWNSTREAM	FBgn0050121	CR30121	433 bp UPSTREAM
3L_9053529_SNP	G	C	C	0.07143	11	143	0.02484	1.67854e-08	FBgn0000116	Argk	INTRON
2R_5777768_DEL	A	AGACCTTTAA	AGACCTTTAA	0.3088	42	94	0.0139	1.20643e-07	FBgn0033463	CG1513	INTRON	FBgn0050008	CG30008	INTRON	FBgn0033461	CG12923	779 bp DOWNSTREAM
2R_12913339_SNP	T	A	A	0.05882	9	144	0.02536	1.89748e-07	FBgn0263864	Ark	SYNONYMOUS_CODING
2L_4648529_DEL	A	ACCGAGA	ACCGAGA	0.0596	9	142	0.02486	3.50747e-07	FBgn0264342	CG43798	610 bp DOWNSTREAM
3L_20036432_INS	TT	T	T	0.05072	7	131	0.02805	3.51251e-07	INTERGENIC
3R_12799800_SNP	T	G	G	0.2095	31	117	-0.01451	4.24998e-07	INTERGENIC
3R_12799894_SNP	A	T	T	0.2148	32	117	-0.01419	5.68593e-07	INTERGENIC
2R_20005362_SNP	G	A	A	0.06494	10	144	0.0232	6.09912e-07	FBgn0034978	CG3257	INTRON
2R_5771199_SNP	T	C	C	0.4054	60	88	0.01185	6.46174e-07	FBgn0033463	CG1513	UTR_3_PRIME
2R_5762328_SNP	G	A	A	0.3235	44	92	0.01294	6.98399e-07	FBgn0011241	cbx	UTR_5_PRIME	FBgn0033459	CG12744	458 bp UPSTREAM
2R_5760716_SNP	T	C	C	0.4082	60	87	0.01183	7.26548e-07	FBgn0011241	cbx	INTRON	FBgn0033458	CG18446	INTRON
3R_12799805_SNP	C	T	T	0.2081	31	118	-0.0142	7.64934e-07	INTERGENIC
2R_5762919_SNP	A	G	G	0.3605	53	94	0.01205	8.21286e-07	FBgn0033459	CG12744	INTRON	FBgn0011241	cbx	342 bp UPSTREAM	FBgn0033460	sec24	818 bp DOWNSTREAM
2L_1099815_SNP	T	C	C	0.05806	9	146	0.02404	8.79636e-07	FBgn0031299	CG4629	INTRON
2L_4422778_SNP	G	A	A	0.07237	11	141	0.02186	9.45039e-07	FBgn0031602	CG15431	INTRON
3R_12799763_INS	TCTTAAACTATGAGTG	C	C	0.2041	30	117	-0.01428	9.66826e-07	INTERGENIC
2R_5794890_SNP	A	G	G	0.4726	69	77	0.01156	9.81738e-07	FBgn0000715	Fmrf	INTRON
3R_8219185_INS	TG	T	T	0.07042	10	132	0.02257	1.38712e-06	FBgn0085431	CG34402	INTRON	FBgn0038032	CG10096	453 bp UPSTREAM	FBgn0038033	CG10097	651 bp DOWNSTREAM
3R_12799714_SNP	A	T	A	0.2148	32	117	-0.0137	1.45777e-06	INTERGENIC
3R_8226635_SNP	C	T	T	0.1067	16	134	0.01803	1.76327e-06	FBgn0085431	CG34402	INTRON	FBgn0038035	lig3	SYNONYMOUS_CODING
3R_12799715_SNP	C	G	C	0.2148	32	117	-0.0136	1.77447e-06	INTERGENIC
2L_21926248_SNP	G	A	A	0.08667	13	137	0.01976	1.81774e-06	INTERGENIC
3L_11793876_SNP	A	C	C	0.07285	11	140	0.02131	1.85087e-06	FBgn0036208	CG10361	UTR_5_PRIME	FBgn0052093	tRNA:CR32093	695 bp DOWNSTREAM
3R_8212198_SNP	G	A	A	0.06207	9	136	0.02335	1.99584e-06	FBgn0085431	CG34402	INTRON	FBgn0053098	CG33098	712 bp UPSTREAM	FBgn0038029	GstD11	852 bp DOWNSTREAM
3R_13525732_DEL	A	ATGTTGATGCCAAA	ATGTTGATGCCAAA	0.07432	11	137	0.02125	2.03111e-06	FBgn0261885	osa	INTRON
3R_8213155_SNP	T	G	G	0.07586	11	134	0.02117	2.2812e-06	FBgn0053098	CG33098	INTRON	FBgn0085431	CG34402	413 bp DOWNSTREAM
3R_12799780_SNP	C	T	T	0.2	29	116	-0.01401	2.30197e-06	INTERGENIC
3R_13587671_SNP	G	T	T	0.07042	10	132	0.0221	2.38119e-06	FBgn0038542	TyrR	INTRON
2R_5763531_SNP	T	C	C	0.4966	72	73	-0.01118	2.45781e-06	FBgn0033459	CG12744	SYNONYMOUS_CODING	FBgn0033460	sec24	206 bp DOWNSTREAM	FBgn0011241	cbx	954 bp UPSTREAM
2R_5794878_SNP	T	G	G	0.4658	68	78	0.01115	2.52731e-06	FBgn0000715	Fmrf	INTRON
3R_23435543_DEL	T	TGTGT	TGTGT	0.0873	11	115	0.02118	2.62143e-06	FBgn0039530	Tusp	INTRON
X_15664908_SNP	A	C	C	0.08917	14	143	0.01878	2.66258e-06	FBgn0053172	CG33172	SYNONYMOUS_CODING
3R_12799709_SNP	T	G	T	0.2081	31	118	-0.01348	2.94444e-06	INTERGENIC
2L_21926249_SNP	A	C	C	0.09272	14	137	0.01872	3.01353e-06	INTERGENIC
2L_5860867_SNP	A	G	G	0.05921	9	143	0.0229	3.10375e-06	FBgn0031745	CG8965	SYNONYMOUS_CODING
3R_15137382_DEL	A	AGTTAGTC	AGTTAGTC	0.09091	13	130	0.01936	3.20926e-06	FBgn0000463	Dl	INTRON
3R_8212181_INS	GTTAAGT	G	G	0.05517	8	137	0.02419	3.26099e-06	FBgn0085431	CG34402	INTRON	FBgn0053098	CG33098	728 bp UPSTREAM	FBgn0038029	GstD11	836 bp DOWNSTREAM
2L_4648562_SNP	G	A	A	0.0719	11	142	0.02081	3.27844e-06	FBgn0264342	CG43798	642 bp DOWNSTREAM
2L_1409815_SNP	A	G	A	0.05263	8	144	0.02414	3.31925e-06	FBgn0002543	lea	INTRON
3R_6478496_INS	AAAAACCTATGGAAAATTACTTATGTCCGGGTA	A	A	0.07843	12	141	-0.01991	3.6461e-06	INTERGENIC
2R_19892747_INS	AAGG	A	A	0.2215	33	116	0.01305	3.75275e-06	FBgn0053519	Unc-89	INTRON
2R_18369048_SNP	A	G	G	0.1457	22	129	0.01523	3.90684e-06	FBgn0034733	CG4752	INTRON
3R_6477712_SNP	A	T	T	0.07792	12	142	-0.01984	3.9535e-06	INTERGENIC
2R_17664116_SNP	A	G	A	0.2483	37	112	0.0125	4.02423e-06	INTERGENIC
2R_4406333_DEL	A	AC	AC	0.06338	9	133	0.0227	4.07433e-06	FBgn0050361	mtt	INTRON
X_2762426_SNP	T	C	C	0.05161	8	147	0.02386	4.32825e-06	FBgn0028369	kirre	INTRON
2L_1688271_SNP	C	T	T	0.05229	8	145	0.02386	4.3814e-06	FBgn0086758	chinmo	INTRON
3R_6478481_SNP	C	T	T	0.08442	13	141	-0.01904	4.39228e-06	INTERGENIC
3R_6478485_INS	GC	A	A	0.08442	13	141	-0.01904	4.39228e-06	INTERGENIC
3R_6475532_SNP	T	C	C	0.07792	12	142	-0.01975	4.39368e-06	INTERGENIC
2L_6538674_SNP	T	G	T	0.1457	22	129	0.01514	4.45648e-06	FBgn0000320	eya	INTRON
3L_1543426_SNP	A	G	G	0.05128	8	148	0.02382	4.48569e-06	FBgn0035229	CG7852	SYNONYMOUS_CODING
3L_7599835_SNP	G	T	G	0.2819	42	107	0.01195	4.51762e-06	FBgn0035802	CG33275	INTRON
2L_10064365_SNP	T	A	A	0.08271	11	122	0.02065	4.51906e-06	FBgn0265002	CG44153	UTR_3_PRIME	FBgn0032178	Spn31A	440 bp DOWNSTREAM
3R_12799857_SNP	A	T	T	0.1879	28	121	-0.0137	4.98326e-06	INTERGENIC
3L_5587280_SNP	T	A	A	0.1176	18	135	0.01639	5.00377e-06	FBgn0035619	CG10592	MISSENSE
3L_9899923_SNP	T	A	A	0.07097	11	144	0.02043	5.02028e-06	INTERGENIC
3L_9888271_SNP	A	G	G	0.07051	11	145	0.02039	5.25339e-06	FBgn0036058	CG6707	UTR_3_PRIME	FBgn0036056	CG6709	428 bp UPSTREAM	FBgn0036057	CG14164	428 bp UPSTREAM
2L_13421940_SNP	T	C	C	0.07843	12	141	0.01959	5.30011e-06	FBgn0263354	CG42784	INTRON
3L_5587779_SNP	A	T	T	0.07534	11	135	0.02042	5.34901e-06	FBgn0035619	CG10592	INTRON	FBgn0035620	CG5150	863 bp UPSTREAM
3L_2343371_SNP	T	C	C	0.09091	14	140	0.01824	5.45425e-06	FBgn0035331	DmsR-1	SYNONYMOUS_CODING
3R_23005386_SNP	C	G	C	0.05128	8	148	0.02359	5.6258e-06	FBgn0004197	Ser	INTRON
3R_25831530_SNP	T	C	C	0.06494	10	144	0.02121	5.91642e-06	FBgn0016685	Nlp	INTRON	FBgn0039736	CG7912	226 bp DOWNSTREAM	FBgn0039735	CG7911	947 bp UPSTREAM
3L_9900525_SNP	A	T	T	0.2	30	120	0.01323	6.02072e-06	FBgn0085385	CG34356	695 bp UPSTREAM
3L_12063034_SNP	C	T	T	0.05921	9	143	0.02227	6.0494e-06	FBgn0250876	Sema-5c	MISSENSE
2L_6590332_SNP	T	C	T	0.06536	10	143	0.02116	6.27961e-06	FBgn0031835	CG11319	INTRON
2L_6590313_SNP	C	T	C	0.06494	10	144	0.02114	6.35233e-06	FBgn0031835	CG11319	INTRON
2L_6590301_SNP	A	T	A	0.06452	10	145	0.02112	6.48773e-06	FBgn0031835	CG11319	INTRON
2L_6590326_SNP	T	A	T	0.06452	10	145	0.02112	6.48773e-06	FBgn0031835	CG11319	INTRON
3R_12799862_SNP	C	G	G	0.1867	28	122	-0.01353	6.57142e-06	INTERGENIC
X_5749277_SNP	T	C	C	0.07742	12	143	0.01937	6.81753e-06	FBgn0262610	CG43136	815 bp DOWNSTREAM
2R_5731291_SNP	C	T	C	0.3493	51	95	-0.01117	7.09825e-06	FBgn0033453	CG1667	UTR_5_PRIME
3L_14625169_SNP	C	T	T	0.06494	10	144	0.021	7.39082e-06	FBgn0027375	RecQ5	UTR_5_PRIME	FBgn0041604	dlp	532 bp UPSTREAM
2R_13516036_INS	AGTA	A	A	0.05674	8	133	0.02337	7.469e-06	FBgn0004400	rhi	UTR_3_PRIME	FBgn0034253	CG10936	INTRON
X_6699772_SNP	A	G	G	0.05128	8	148	0.02329	7.49551e-06	FBgn0029903	pod1	UTR_5_PRIME
3R_20618039_SNP	A	T	T	0.05195	8	146	-0.0233	7.54719e-06	FBgn0039225	Ets96B	INTRON
2R_11887570_SNP	A	T	T	0.07143	11	143	0.02007	7.59166e-06	FBgn0020236	ATPCL	INTRON
2R_5781559_SNP	C	T	C	0.3356	50	99	-0.01113	7.62018e-06	FBgn0050007	CG30007	MISSENSE
X_22232347_DEL	G	GCTGCTG	GCTGCTG	0.08088	11	125	0.02015	7.75004e-06	FBgn0000719	fog	INTRON
2L_4648712_SNP	A	T	T	0.08163	12	135	0.01927	8.02957e-06	FBgn0264342	CG43798	792 bp DOWNSTREAM
2L_4648720_SNP	A	G	G	0.08163	12	135	0.01927	8.02957e-06	FBgn0264342	CG43798	800 bp DOWNSTREAM
3R_6479145_SNP	G	C	C	0.0719	11	142	-0.01998	8.40833e-06	INTERGENIC
3L_1972359_SNP	T	C	C	0.07097	11	144	0.01997	8.46965e-06	FBgn0035300	CG1139	SYNONYMOUS_CODING
2L_5095910_SNP	C	T	T	0.05096	8	149	0.02313	8.76941e-06	FBgn0031682	CG5828	185 bp DOWNSTREAM	FBgn0031683	CG4230	317 bp UPSTREAM
3R_15136783_SNP	C	A	A	0.05405	8	140	0.02316	8.81645e-06	FBgn0000463	Dl	INTRON
2R_5778612_SNP	G	A	G	0.3067	46	104	-0.01128	8.86459e-06	FBgn0033463	CG1513	INTRON	FBgn0050008	CG30008	UTR_3_PRIME	FBgn0050007	CG30007	848 bp UPSTREAM
3L_10069221_SNP	T	C	C	0.06494	10	144	0.02081	9.08422e-06	FBgn0040823	dpr6	INTRON
X_2458891_SNP	A	T	T	0.104	13	112	0.01859	9.64228e-06	FBgn0260753	Pdfr	INTRON
3L_10972880_SNP	G	A	A	0.05195	8	146	0.02302	9.83287e-06	INTERGENIC
2L_829405_SNP	T	C	C	0.0719	11	142	0.01984	9.8366e-06	FBgn0010583	dock	INTRON
2R_19135919_SNP	T	C	C	0.4054	60	88	0.01061	9.9117e-06	FBgn0034837	RpL22-like	509 bp UPSTREAM

[truncated: 2 more sheets: M PC 4, M PC 5]
