# Supplementary material for: Genetic architecture of natural variation in cuticular hydrocarbon composition in Drosophila melanogaster
Source: eLife. 2015 Nov 14;4:e09861. doi: 10.7554/eLife.09861 (PMC4749392; doi:10.7554/eLife.09861)
Supplement: Supplementary file 8. — DOI: http://dx.doi.org/10.7554/eLife.09861.047 [file elife-09861-supp8.xlsx]

## Sheet: Sheet1
Supplementary file 8. VDRC and Exelixis trangenic line information.
Gene Symbol	CG Number	Transformant ID	Construct ID	Library
Cyp9f2	CG11466	106779	108846	KK
CG14688	CG14688	39840	8408	GD
CG9458	CG9458	102418	111629	KK
CG8814	CG8814	2606	851	GD
CG18609	CG18609	100172	105151	KK
Irc	CG8913	101098	106899	KK
Pxd	CG3477	48587	16228	GD
Prx6005	CG3083	25020	8678	GD
pxn	CG12002	15276	5987	GD
CG9801	CG9801	104525	109810	KK
Nrt	CG9704	106080	106657	KK
CG7724	CG7724	105609	100469	KK
Cyp4s3	CG9081	38217	6307	GD
CG5599	CG5599	106456	102355	KK
Cyp49a1	CG18377	101530	108974	KK
PHGPx	CG12013	100790	108651	KK
CG13091	CG13091	100943	106304	KK
CG8680	CG8680	102017	109286	KK
Lip2	CG17116	102033	110460	KK
CG30008	CG30008	102817	103887	KK
CG16979	CG16979	105386	100413	KK
Desi	CG14686	105692	111920	KK
app	CG42318	106488	108227	KK
		Exelixis ID
CG10097	CG10097	e00276
