# Supplementary material for: Genetic architecture of natural variation in cuticular hydrocarbon composition in Drosophila melanogaster
Source: eLife. 2015 Nov 14;4:e09861. doi: 10.7554/eLife.09861 (PMC4749392; doi:10.7554/eLife.09861)
Supplement: Supplementary file 9. — (A) Mean difference between RNAi or mutant CHCs and controls, females. (B) Mean difference between RNAi or mutant CHCs and controls, males. (C) Experiment 1 raw data for KK RNAi lines, females. (D) Experiment 2 raw data for KK RNAi lines, females. (E) Raw data for GD RNAi lines, females. (F) Raw data for Exelixis mutation, females. (G) Experiment 1 raw data for KK RNAi lines, males. (H) Experiment 2 raw data for KK RNAi lines, males. (I) Raw data for GD RNAi lines, males. (J) Raw data for Exelixis mutation, males. DOI: http://dx.doi.org/10.7554/eLife.09861.048 [file elife-09861-supp9.xlsx]

## Sheet: A
Peak #	CHC (#)	CHC Type	app	CG13091	CG16979	CG30008	CG8680	Desi	Lip2	PHGPx	Cyp9f2	CG18609	CG5599	CG7724	Irc	CG9458	Nrt	CG9801	Cyp49a1	Pxd	Prx6005	pxn	Cyp4s3	CG14688	CG8814	CG10097	CHC (#) *CG10097 only	Type
1	n-C21 (1)	n-alkane	0.6 (P = 0.5448)	-1.27 (P = 0.2099)	0.005412 (P = 0.9958)	-0.47 (P = 0.6841)	13.1 (P = 0.0006)	0.392 (P = 0.7101)	2.11 (P = 0.0843)	-0.094 (P = 0.9265)	-0.26 (P = 0.9097)	-3.21 (P = 0.022)	23.9 (P = 0.0019)	-0.56 (P = 0.6541)	0.027 (P = 0.9813)	-5.03 (P = 0.0033)	-0.437 (P = 0.7475)	-3.87 (P = 0.0073)	-4.28 (P = 0.0083)	16.4 (P = 0.0155)	3.19 (P = 0.0017)	1.07 (P = 0.0479)	17.3 (P = 0.0289)	10.8 (P = 0.0053)	6.23 (P = 0.0116)	-0.85 (P = 0.1129)	n-C21 (1)	n-alkane
4	n-C22 (4)	n-alkane	2.89 (P = 0.0978)	-2.06 (P = 0.3431)	0.641 (P = 0.7243)	-0.36 (P = 0.8485)	27 (P = 0.0016)	-0.24 (P = 0.8782)	5.37 (P = 0.0312)	1.04 (P = 0.531)	-1.6 (P = 0.5841)	-5.22 (P = 0.0239)	39.1 (P = 0.0005)	-2.07 (P = 0.2662)	-4.2 (P = 0.0447)	-8.47 (P = 0.003)	-3.59 (P = 0.106)	-7.82 (P = 0.0032)	-6.77 (P = 0.0074)	28.4 (P = 0.0177)	4.66 (P = 0.0083)	-0.641 (P = 0.4977)	26.5 (P = 0.0414)	13.3 (P = 0.0071)	11.9 (P = 0.0198)	-3 (P = 0.0348)	n-C22 (4)	n-alkane
5	7,11-C23:2 (5)	diene	0.54 (P = 0.5465)	-0.02 (P = 0.9694)	0.761 (P = 0.5062)	3.09 (P = 0.1034)	9.19 (P = 0.0058)	0.523 (P = 0.6571)	1.04 (P = 0.1845)	1.39 (P = 0.1417)	-0.87 (P = 0.7176)	-2.9 (P = 0.1109)	31.2 (P = 0.0017)	2.48 (P = 0.2678)	3.95 (P = 0.0861)	-1.41 (P = 0.3863)	6.64 (P = 0.0254)	-2.71 (P = 0.1247)	-4.9 (P = 0.0335)	19.3 (P = 0.0126)	2.56 (P = 0.016)	-2.31 (P = 0.0132)	12.2 (P = 0.0732)	11.2 (P = 0.0183)	8.11 (P = 0.0138)	-3.79 (P = 0.0144)	7,11-C23:2 (5)	diene
6	2-Me-C22 (6)	2-methyl	1.26 (P = 0.0237)	0.85 (P = 0.1679)	0.811 (P = 0.3795)	0.057 (P = 0.9335)	15.1 (P = 0.0009)	0.546 (P = 0.6059)	-0.008413 (P = 0.9876)	-0.434 (P = 0.5282)	3.93 (P = 0.1621)	-0.92 (P = 0.1967)	23.4 (P = 0.0002)	7.96 (P = 0.0046)	-0.21 (P = 0.8096)	9.97 (P = 0.0025)	5.8 (P = 0.0055)	-1.55 (P = 0.0817)	1.44 (P = 0.3696)	4.3 (P = 0.0439)	-1.27 (P = 0.0917)	-0.39 (P = 0.501)	5.06 (P = 0.0188)	7.12 (P = 0.0299)	8.02 (P = 0.0191)	-2.82 (P = 0.0093)	2-Me-C22 (6)	2-methyl
8	9-C23:1 (8)	monoene	-0.382 (P = 0.6582)	-0.65 (P = 0.3057)	-0.15 (P = 0.8724)	-1.52 (P = 0.1578)	12.7 (P = 0.0138)	-0.21 (P = 0.8395)	0.37 (P = 0.6661)	0.59 (P = 0.4164)	-2.24 (P = 0.3798)	-2.81 (P = 0.1169)	23.4 (P = 0.0009)	-1.55 (P = 0.4361)	-0.88 (P = 0.6154)	-5.32 (P = 0.017)	1.18 (P = 0.5901)	-5.4 (P = 0.0168)	-7.15 (P = 0.0068)	18.1 (P = 0.0093)	2.02 (P = 0.0331)	-0.651 (P = 0.2955)	16.8 (P = 0.0321)	11.3 (P = 0.0094)	8.67 (P = 0.0066)	-1.35 (P = 0.2294)	9-C23:1 (8)	monoene
9	7-C23:1 (9)	monoene	1.51 (P = 0.5382)	-1.21 (P = 0.4972)	0.532 (P = 0.8537)	0.29 (P = 0.9223)	43.3 (P = 0.0292)	1.16 (P = 0.7081)	4.42 (P = 0.1514)	2.85 (P = 0.2217)	-3.71 (P = 0.4896)	-2.57 (P = 0.4855)	92.2 (P = 0.0001)	8.05 (P = 0.182)	-1.53 (P = 0.7076)	-10.9 (P = 0.0215)	3.84 (P = 0.4695)	-8.64 (P = 0.0472)	-12.3 (P = 0.0197)	52.1 (P = 0.0089)	8.71 (P = 0.0126)	-1.78 (P = 0.3447)	45 (P = 0.0354)	24.5 (P = 0.0119)	18.6 (P = 0.012)	4.87 (P = 0.5619)	7-C23:1 (9)	monoene
10	6-C23:1 (10)	monoene	1.56 (P = 0.0411)	-0.44 (P = 0.3895)	0.322 (P = 0.7194)	0.161 (P = 0.8455)	13.6 (P = 0.0044)	0.577 (P = 0.5559)	1.33 (P = 0.133)	0.68 (P = 0.2688)	-3.24 (P = 0.0733)	-2.82 (P = 0.0232)	16.6 (P = 0.0004)	-1.01 (P = 0.3355)	-4.28 (P = 0.0079)	-3.19 (P = 0.0147)	-0.697 (P = 0.5529)	-5.42 (P = 0.0017)	-4.35 (P = 0.0087)	11.7 (P = 0.01)	1.56 (P = 0.0322)	0.27 (P = 0.5297)	14.1 (P = 0.0271)	7.88 (P = 0.0143)	6.07 (P = 0.0082)	-0.72 (P = 0.0545)	6-C23:1 (10)	monoene
11	5-C23:1 (11)	monoene	0.03 (P = 0.9132)	-0.65 (P = 0.0226)	-0.04 (P = 0.9113)	-0.75 (P = 0.04)	5.93 (P = 0.0174)	0.119 (P = 0.7573)	0.54 (P = 0.1736)	0.41 (P = 0.1731)	-0.87 (P = 0.1297)	-0.87 (P = 0.0668)	9.07 (P = 0.0002)	-0.49 (P = 0.3742)	-1.25 (P = 0.0338)	-2.23 (P = 0.003)	-0.549 (P = 0.3291)	-2.03 (P = 0.0042)	-1.77 (P = 0.0102)	4.88 (P = 0.0046)	0.79 (P = 0.0191)	0.13 (P = 0.4794)	5.08 (P = 0.0475)	2.18 (P = 0.0177)	1.25 (P = 0.0183)	1.2 (P = 0.0469)	5-C23:1 (11)	monoene
12	x-C23:1 (12)	monoene	0.42 (P = 0.0031)	-0.26 (P = 0.0614)	-0.00916 (P = 0.9421)	-0.45 (P = 0.0058)	2.59 (P = 0.0039)	-0.00519 (P = 0.9691)	0.26 (P = 0.0791)	0.01 (P = 0.893)	0.009042 (P = 0.9758)	-0.43 (P = 0.0198)	2.7 (P = 0.0003)	-0.38 (P = 0.0342)	-0.72 (P = 0.0017)	-0.51 (P = 0.0061)	-0.155 (P = 0.2477)	-0.83 (P = 0.0009)	-0.5 (P = 0.0295)	0.82 (P = 0.0404)	-0.17 (P = 0.3998)	0.14 (P = 0.4905)	2.38 (P = 0.03)	1.32 (P = 0.0193)	0.435 (P = 0.2031)	0.122 (P = 0.0054)	x-C23:1 (12)	monoene
13	n-C23 (13)	n-alkane	22.3 (P = 0.1378)	-15.7 (P = 0.3581)	-4.04 (P = 0.7643)	-56.3 (P = 0.0109)	389.1 (P = 0.0002)	6.62 (P = 0.6204)	54.3 (P = 0.0235)	3.92 (P = 0.8113)	-17.6 (P = 0.5456)	-24.6 (P = 0.1491)	380 (P = 0.0005)	14 (P = 0.3329)	-39.9 (P = 0.0213)	-69.5 (P = 0.0018)	-8.18 (P = 0.6854)	-52.2 (P = 0.0058)	-54 (P = 0.0094)	228.3 (P = 0.0197)	45.8 (P = 0.0066)	14.8 (P = 0.1484)	247.6 (P = 0.0251)	155.6 (P = 0.0043)	107 (P = 0.0099)	19.3 (P = 0.0282)	n-C23 (13)	n-alkane
14	11-/ 9-Me-C23 (14)	x-methyl	0.48 (P = 0.0839)	0.394 (P = 0.0611)	0.308 (P = 0.1893)	0.29 (P = 0.156)	2.55 (P = 0.0166)	0.287 (P = 0.1775)	0.69 (P = 0.0084)	0.27 (P = 0.1363)	-0.4 (P = 0.0942)	-0.27 (P = 0.2146)	6.67 (P = 0.001)	-0.21 (P = 0.3582)	-0.57 (P = 0.0335)	-0.57 (P = 0.0544)	-0.098 (P = 0.7609)	-0.68 (P = 0.0152)	-0.86 (P = 0.0068)	1.81 (P = 0.0133)	0.16 (P = 0.2756)	0.08 (P = 0.4228)	2.1 (P = 0.0266)	0.786 (P = 0.0311)	1.03 (P = 0.01)	0.181 (P = 0.2572)	11-/ 9-Me-C23 (14)	x-methyl
15	7,11-C24:2 (15)	diene	0.14 (P = 0.3991)	-0.15 (P = 0.1652)	0.04 (P = 0.7953)	0.688 (P = 0.0992)	1.34 (P = 0.0504)	-0.02 (P = 0.905)	0.1 (P = 0.3064)	0.19 (P = 0.1853)	-0.49 (P = 0.1405)	-0.63 (P = 0.0376)	3.67 (P = 0.0013)	-0.37 (P = 0.1758)	-0.25 (P = 0.3026)	-0.78 (P = 0.0198)	0.05 (P = 0.8643)	-0.89 (P = 0.0103)	-0.6 (P = 0.0478)	2.74 (P = 0.0121)	0.24 (P = 0.1057)	-0.45 (P = 0.0126)	1.93 (P = 0.0869)	1.08 (P = 0.0172)	1.58 (P = 0.0068)	-1.18 (P = 0.0012)	7,11-C24:2 (15)	diene
16	x,y-C24:2 (16)	diene	0.1 (P = 0.6308)	-0.32 (P = 0.0861)	-0.17 (P = 0.4011)	-0.16 (P = 0.3859)	1.99 (P = 0.0028)	-0.08 (P = 0.7397)	-0.253 (P = 0.0931)	-0.094 (P = 0.6078)	0.783 (P = 0.0357)	1.5 (P = 0.0001)	2.07 (P = 0.0006)	1.18 (P = 0.0001)	0.178 (P = 0.2907)	0.096 (P = 0.648)	1.36 (P = 0.0002)	0.038 (P = 0.6935)	0.215 (P = 0.3561)	0.61 (P = 0.089)	0.23 (P = 0.2835)	0.28 (P = 0.1576)	0.584 (P = 0.0816)	1.64 (P = 0.0136)	1.38 (P = 0.0126)	-0.11 (P = 0.3821)	x,y-C24:2 (16)	diene
17	3-Me-C23/ 9-C24:1 (17)	x-methyl / monoene	0.35 (P = 0.27)	-0.35 (P = 0.1043)	-0.07 (P = 0.8432)	0.228 (P = 0.4952)	4.64 (P = 0.016)	0.014 (P = 0.9654)	0.34 (P = 0.1616)	0.08 (P = 0.7166)	-0.54 (P = 0.1698)	0.113 (P = 0.6938)	7.18 (P = 0.0001)	0.577 (P = 0.1516)	-0.62 (P = 0.0909)	-0.55 (P = 0.1407)	0.47 (P = 0.2551)	-1.03 (P = 0.0169)	-1.03 (P = 0.0252)	4.29 (P = 0.0097)	0.47 (P = 0.0665)	-0.162 (P = 0.3774)	3.85 (P = 0.0334)	2.04 (P = 0.0147)	2.44 (P = 0.0033)	-0.38 (P = 0.1736)	3-Me-C23/ 9-C24:1 (17)	x-methyl / monoene
19	6-C24:1 (19)	monoene	-0.073 (P = 0.8935)	-0.46 (P = 0.2524)	-0.25 (P = 0.683)	-1.09 (P = 0.0651)	7.96 (P = 0.0455)	-0.03 (P = 0.9591)	0.71 (P = 0.207)	-0.078 (P = 0.8349)	-1.25 (P = 0.1846)	-0.73 (P = 0.2617)	11.9 (P = 0.0003)	-0.24 (P = 0.7193)	-2.26 (P = 0.012)	-2.72 (P = 0.0058)	-1.51 (P = 0.0754)	-2.5 (P = 0.0076)	-1.76 (P = 0.03)	8.93 (P = 0.0115)	0.98 (P = 0.0966)	-1.2 (P = 0.0321)	7.78 (P = 0.0536)	2.5 (P = 0.0384)	4.12 (P = 0.0106)	-4.44 (P = 0.0031)	6-C24:1 (19)	monoene
20	NI (20)	NI	0.44 (P = 0.0484)	-0.3 (P = 0.0518)	-0.09 (P = 0.6117)	0.505 (P = 0.0516)	3.07 (P = 0.0126)	-0.08 (P = 0.5964)	0.16 (P = 0.2885)	0.12 (P = 0.4287)	-0.91 (P = 0.026)	-0.44 (P = 0.0901)	4.58 (P = 0.0001)	-0.16 (P = 0.5489)	-1.09 (P = 0.0059)	-1.07 (P = 0.0029)	-0.287 (P = 0.3426)	-1.3 (P = 0.0015)	-0.89 (P = 0.0076)	3.41 (P = 0.0054)	0.64 (P = 0.0409)	0.18 (P = 0.4565)	3.11 (P = 0.0261)	1.65 (P = 0.0105)	1.9 (P = 0.007)	-0.22 (P = 0.4332)	NI (20)	NI
21	5-C24:1 (21)	monoene	-0.024 (P = 0.9194)	-0.33 (P = 0.0786)	-0.04 (P = 0.8677)	-0.77 (P = 0.0066)	3.34 (P = 0.0289)	0.008414 (P = 0.9745)	0.32 (P = 0.1497)	0.00461 (P = 0.978)	-0.04 (P = 0.8921)	-0.43 (P = 0.1297)	7.75 (P = <.0001)	0.084 (P = 0.7617)	-0.97 (P = 0.012)	-1.1 (P = 0.0059)	-0.761 (P = 0.0321)	-1.13 (P = 0.0046)	-0.84 (P = 0.0154)	3.45 (P = 0.0093)	1.18 (P = 0.0032)	-0.382 (P = 0.0516)	2.46 (P = 0.0709)	1.31 (P = 0.0186)	2.07 (P = 0.0046)	-2.92 (P = 0.0008)	5-C24:1 (21)	monoene
22	n-C24 (22)	n-alkane	4.84 (P = 0.0114)	-2.12 (P = 0.3764)	0.435 (P = 0.7987)	-2.36 (P = 0.2424)	50.7 (P = 0.0009)	-0.69 (P = 0.6335)	7.38 (P = 0.0215)	-2 (P = 0.3307)	-4.35 (P = 0.1533)	-0.67 (P = 0.7457)	44.2 (P = 0.0001)	-0.33 (P = 0.8374)	-9.98 (P = 0.0007)	-10.2 (P = 0.0008)	-6.05 (P = 0.0219)	-9.14 (P = 0.001)	-6.03 (P = 0.0075)	25.6 (P = 0.0323)	4.3 (P = 0.0506)	-0.087 (P = 0.9511)	26.9 (P = 0.0294)	13.6 (P = 0.0092)	16.9 (P = 0.0143)	-6.01 (P = 0.0125)	n-C24 (22)	n-alkane
23	9,13-C25:2 (23)	diene	2.16 (P = 0.0258)	-0.45 (P = 0.3027)	0.324 (P = 0.6977)	2.04 (P = 0.0846)	13.6 (P = 0.0048)	0.052 (P = 0.9498)	0.61 (P = 0.3223)	2.42 (P = 0.0164)	-2.41 (P = 0.1794)	-0.12 (P = 0.9286)	27.6 (P = 0.0008)	3.5 (P = 0.1328)	3.03 (P = 0.086)	1.55 (P = 0.2313)	9.27 (P = 0.01)	-1.04 (P = 0.4252)	-3.2 (P = 0.067)	16.4 (P = 0.0141)	0.13 (P = 0.86)	-4.49 (P = 0.0021)	9.98 (P = 0.0798)	6.26 (P = 0.0634)	8.02 (P = 0.0158)	-1.96 (P = 0.0834)	9,13-C25:2 (23)	diene
24	7,11-C25:2 (24)	diene	5.65 (P = 0.1908)	-4.96 (P = 0.0772)	1.63 (P = 0.7276)	8.93 (P = 0.2165)	69.8 (P = 0.0091)	3.41 (P = 0.5129)	7.38 (P = 0.0821)	12.5 (P = 0.0334)	4.85 (P = 0.4937)	1.59 (P = 0.7927)	108.1 (P = 0.0002)	22.3 (P = 0.0693)	31.6 (P = 0.0084)	3.54 (P = 0.5128)	36.2 (P = 0.0106)	0.747 (P = 0.8964)	-16.5 (P = 0.0439)	69.9 (P = 0.0094)	6.58 (P = 0.1169)	-9.73 (P = 0.0394)	49.3 (P = 0.0796)	33.6 (P = 0.0363)	20.5 (P = 0.0156)	-6.15 (P = 0.1325)	7,11-C25:2 (24)	diene
25	2-Me-C24 (25)	2-methyl	11.3 (P = 0.0039)	0.607 (P = 0.7787)	3.33 (P = 0.5674)	-1.56 (P = 0.4145)	78.1 (P = 0.0007)	2.45 (P = 0.4928)	0.54 (P = 0.857)	2.67 (P = 0.5454)	17.6 (P = 0.0427)	59.1 (P = <.0001)	52.3 (P = 0.0028)	44.6 (P = 0.0009)	8.49 (P = 0.0488)	1.37 (P = 0.655)	31.2 (P = 0.0177)	8.6 (P = 0.0246)	9.34 (P = 0.177)	-1.32 (P = 0.857)	-3.35 (P = 0.5828)	-1.86 (P = 0.7539)	-1.06 (P = 0.8575)	35.8 (P = 0.0485)	31.7 (P = 0.0701)	-19 (P = 0.0037)	2-Me-C24 (25)	2-methyl
26	6,10-C25:2 (26)	diene	2.21 (P = 0.0641)	-1.17 (P = 0.0453)	-0.1 (P = 0.8978)	0.387 (P = 0.5989)	19 (P = 0.021)	-0.00851 (P = 0.9907)	0.63 (P = 0.4447)	0.22 (P = 0.667)	-1.98 (P = 0.2557)	-0.24 (P = 0.8676)	25.8 (P = <.0001)	2.56 (P = 0.2689)	-2.15 (P = 0.1753)	-1.56 (P = 0.1886)	2.79 (P = 0.227)	-4.21 (P = 0.0144)	-3.76 (P = 0.0217)	17 (P = 0.0085)	2.25 (P = 0.0909)	-1.47 (P = 0.2059)	16 (P = 0.0304)	8.49 (P = 0.0133)	8.61 (P = 0.0113)	1.45 (P = 0.4423)	6,10-C25:2 (26)	diene
27	5,9-C25:2 / 9-C25:1 (27)	diene /monoene	9.8 (P = 0.2411)	-8.77 (P = 0.1199)	1.96 (P = 0.8341)	0.996 (P = 0.9139)	199.7 (P = 0.0306)	2.18 (P = 0.8273)	13.9 (P = 0.1677)	8.77 (P = 0.2093)	-17.1 (P = 0.2398)	-3.21 (P = 0.7583)	218.9 (P = <.0001)	20.6 (P = 0.1799)	-22 (P = 0.0702)	-19.4 (P = 0.0682)	14.2 (P = 0.3187)	-25.5 (P = 0.0359)	-30.4 (P = 0.0306)	145.5 (P = 0.0095)	7.16 (P = 0.3486)	-11.6 (P = 0.1306)	144.8 (P = 0.0313)	62.8 (P = 0.0255)	63.9 (P = 0.0102)	-27.2 (P = 0.0601)	5,9-C25:2 / 9-C25:1 (27)	diene /monoene
28	8-C25:1 (28)	monoene	1.92 (P = <.0001)	-0.41 (P = 0.0925)	0.276 (P = 0.4373)	5.11 (P = 0.0014)	7.62 (P = 0.0003)	0.335 (P = 0.3761)	0.89 (P = 0.033)	0.87 (P = 0.0228)	-4.06 (P = 0.0036)	-1.99 (P = 0.058)	3.37 (P = 0.0213)	-1.71 (P = 0.199)	-3.92 (P = 0.0099)	-3.47 (P = 0.0092)	0.6 (P = 0.6282)	-4.82 (P = 0.0016)	-2.11 (P = 0.0278)	5.03 (P = 0.0336)	2.42 (P = 0.0294)	-0.362 (P = 0.5703)	8.09 (P = 0.0355)	7.31 (P = 0.0176)	6.1 (P = 0.0133)	-0.03 (P = 0.9165)	8-C25:1 (28)	monoene
29	7-C25:1 (29)	monoene	0.75 (P = 0.8086)	-4.54 (P = 0.0969)	-0.23 (P = 0.9528)	-11.1 (P = 0.009)	94.8 (P = 0.0308)	1.11 (P = 0.7934)	6.53 (P = 0.1876)	0.77 (P = 0.753)	-22.5 (P = 0.0252)	-7.43 (P = 0.2759)	117.6 (P = <.0001)	0.971 (P = 0.8919)	-24.2 (P = 0.0119)	-29.8 (P = 0.003)	-12.9 (P = 0.1473)	-25.8 (P = 0.0053)	-21.4 (P = 0.0164)	90.3 (P = 0.0045)	14.8 (P = 0.0146)	2.8 (P = 0.4117)	80.4 (P = 0.0194)	33.4 (P = 0.011)	37.8 (P = 0.0074)	-10.7 (P = 0.3544)	7-C25:1 (29)	monoene
31	5-C25:1 (31)	monoene	0.07 (P = 0.8713)	0.308 (P = 0.5398)	0.085 (P = 0.8969)	-2.3 (P = 0.0032)	12.3 (P = 0.0169)	0.295 (P = 0.6245)	1.45 (P = 0.1317)	-0.505 (P = 0.3366)	-4.24 (P = 0.0015)	-3.17 (P = 0.0205)	12.1 (P = 0.0001)	-1.72 (P = 0.066)	-4.92 (P = 0.0005)	-4.59 (P = 0.0006)	-3.61 (P = 0.0045)	-3.8 (P = 0.0008)	-2.51 (P = 0.0083)	11.8 (P = 0.0041)	2.43 (P = 0.0216)	0.96 (P = 0.2176)	9.83 (P = 0.0259)	3.27 (P = 0.0214)	4.44 (P = 0.0086)	2.37 (P = 0.0152)	5-C25:1 (31)	monoene
32	n-C25 (32)	n-alkane	17.6 (P = 0.0552)	-10.4 (P = 0.1838)	-1.27 (P = 0.8213)	-36.4 (P = 0.0042)	301.3 (P = 0.0001)	1.71 (P = 0.7682)	26.4 (P = 0.0252)	-10.7 (P = 0.2848)	-13.1 (P = 0.3155)	14.1 (P = 0.2078)	215.5 (P = <.0001)	17.7 (P = 0.0377)	-35.8 (P = 0.0016)	-41 (P = 0.0004)	-8.38 (P = 0.4454)	-26.7 (P = 0.0036)	-23.6 (P = 0.0186)	74.9 (P = 0.0701)	8.73 (P = 0.3334)	9.18 (P = 0.2492)	121 (P = 0.0038)	74.5 (P = 0.0087)	67.6 (P = 0.0152)	35.7 (P = 0.0029)	n-C25 (32)	n-alkane
33	NI (33)	NI	0.12 (P = 0.0048)	0.059 (P = 0.1005)	0.052 (P = 0.2854)	0.056 (P = 0.166)	1.06 (P = 0.0106)	0.025 (P = 0.651)	0.11 (P = 0.0697)	-0.097 (P = 0.2187)	-0.23 (P = 0.0528)	0.547 (P = 0.0056)	1.38 (P = 0.0004)	0.25 (P = 0.0291)	-0.16 (P = 0.1605)	0.014 (P = 0.8354)	0.11 (P = 0.4578)	-0.11 (P = 0.138)	-0.24 (P = 0.0303)	0.41 (P = 0.061)	0.13 (P = 0.3555)	-0.084 (P = 0.4991)	0.386 (P = 0.0483)	0.197 (P = 0.2391)	0.541 (P = 0.0421)	-0.35 (P = 0.0363)	NI (33)	NI
34	NI (34)	NI	0.04 (P = 0.3739)	0.035 (P = 0.3739)	0.044 (P = 0.3739)	0 (P = 1)	0.619 (P = 0.0151)	0.035 (P = 0.3739)	0.12 (P = 0.0739)	0.08 (P = 0.3739)	-0.15 (P = 0.1278)	-0.12 (P = 0.2078)	0.807 (P = 0.0025)	-0.2 (P = 0.0199)	-0.2 (P = 0.0199)	-0.2 (P = 0.0199)	-0.16 (P = 0.0838)	-0.2 (P = 0.0199)	-0.2 (P = 0.0199)	0.29 (P = 0.0243)	-0.037 (P = 0.6731)	0.05 (P = 0.5405)	0.422 (P = 0.0076)	-0.05 (P = 0.6435)	0.113 (P = 0.3521)	0.106 (P = 0.0892)	NI (34)	NI
35	13-/11-Me-C25 (35)	x-methyl	0.23 (P = 0.0108)	-0.03 (P = 0.6005)	0.076 (P = 0.4152)	0.191 (P = 0.0217)	1.22 (P = 0.0115)	0.052 (P = 0.4623)	0.22 (P = 0.0095)	0.01 (P = 0.7582)	-0.22 (P = 0.1262)	-0.18 (P = 0.1652)	2.76 (P = 0.0004)	0.02 (P = 0.8746)	-0.24 (P = 0.0967)	-0.2 (P = 0.1323)	0.11 (P = 0.4414)	-0.23 (P = 0.1085)	-0.39 (P = 0.0366)	1.14 (P = 0.0042)	0.24 (P = 0.0533)	0.15 (P = 0.1504)	1.13 (P = 0.0285)	0.413 (P = 0.0323)	0.816 (P = 0.0018)	0.02 (P = 0.7885)	13-/11-Me-C25 (35)	x-methyl
36	5-Me-C25 (36)	x-methyl	0.23 (P = 0.0334)	-0.02 (P = 0.5837)	0.039 (P = 0.678)	0.135 (P = 0.1998)	1.75 (P = 0.0135)	-0.02 (P = 0.8225)	0.19 (P = 0.0367)	0.03 (P = 0.6553)	-0.38 (P = 0.0072)	0.02 (P = 0.8119)	3 (P = 0.0005)	-0.28 (P = 0.027)	-0.47 (P = 0.009)	-0.39 (P = 0.0038)	-0.158 (P = 0.3719)	-0.42 (P = 0.0024)	-0.29 (P = 0.0165)	0.84 (P = 0.0075)	0.09 (P = 0.3998)	0.07 (P = 0.5106)	1.11 (P = 0.0098)	0.463 (P = 0.0114)	0.612 (P = 0.0098)	-0.14 (P = 0.0929)	5-Me-C25 (36)	x-methyl
37	8,12-C26:2 (37)	diene	0.36 (P = 0.2713)	-0.51 (P = 0.0096)	-0.04 (P = 0.8792)	0.777 (P = 0.112)	3.63 (P = 0.0211)	-0.00592 (P = 0.9831)	0.28 (P = 0.1821)	0.48 (P = 0.085)	-0.34 (P = 0.3213)	-0.23 (P = 0.4246)	4.9 (P = 0.0006)	0.093 (P = 0.7722)	-0.15 (P = 0.5916)	-0.57 (P = 0.0749)	0.46 (P = 0.2244)	-0.84 (P = 0.0283)	-0.67 (P = 0.0667)	3.33 (P = 0.0083)	0.14 (P = 0.578)	-0.51 (P = 0.0778)	3.02 (P = 0.0815)	1.29 (P = 0.0289)	1.78 (P = 0.0105)	-1.3 (P = 0.0015)	8,12-C26:2 (37)	diene
38	7,11-C26:2 (38)	diene	1.27 (P = 0.1342)	-1.28 (P = 0.0335)	0.473 (P = 0.6321)	1.54 (P = 0.1412)	15.3 (P = 0.0145)	0.522 (P = 0.5837)	1.19 (P = 0.0891)	1.32 (P = 0.1162)	-0.03 (P = 0.9778)	0.12 (P = 0.8851)	21 (P = 0.0002)	3.18 (P = 0.028)	-0.89 (P = 0.2571)	-0.06 (P = 0.9343)	3.22 (P = 0.0264)	-1.48 (P = 0.0841)	-2.59 (P = 0.0242)	9.45 (P = 0.013)	0.17 (P = 0.8474)	-1.34 (P = 0.1517)	8.84 (P = 0.0485)	5.3 (P = 0.0578)	4.15 (P = 0.0354)	-1.99 (P = 0.0307)	7,11-C26:2 (38)	diene
39	2-Me-C25 (39)	2-methyl	0.78 (P = 0.0253)	1.24 (P = 0.0044)	0.041 (P = 0.9376)	-0.5 (P = 0.0719)	7.87 (P = 0.0056)	0.066 (P = 0.7375)	-0.027 (P = 0.9051)	-0.586 (P = 0.3461)	0.457 (P = 0.536)	-0.05 (P = 0.8098)	8.46 (P = 0.0015)	2 (P = 0.0107)	-0.23 (P = 0.5146)	-0.96 (P = 0.0205)	0.81 (P = 0.1819)	-0.42 (P = 0.1436)	0.516 (P = 0.3947)	1.45 (P = 0.1196)	0.06 (P = 0.8302)	0.39 (P = 0.2148)	1.23 (P = 0.1607)	3.91 (P = 0.0064)	4.27 (P = 0.0172)	-2.03 (P = 0.0126)	2-Me-C25 (39)	2-methyl
40	6,10-C26:2 (40)	diene	1.21 (P = 0.1749)	-1.29 (P = 0.0076)	0.35 (P = 0.6443)	1.23 (P = 0.2113)	10.4 (P = 0.0161)	0.168 (P = 0.8034)	1.04 (P = 0.0434)	0.92 (P = 0.1401)	0.599 (P = 0.3764)	-1.16 (P = 0.0685)	14.1 (P = 0.0001)	2.11 (P = 0.0295)	-0.21 (P = 0.7005)	0.023 (P = 0.964)	2.21 (P = 0.0202)	-1.17 (P = 0.0771)	-1.49 (P = 0.0439)	6.56 (P = 0.011)	0.62 (P = 0.3683)	-0.645 (P = 0.3433)	6 (P = 0.0936)	3.88 (P = 0.0236)	4.68 (P = 0.0093)	-2.59 (P = 0.0011)	6,10-C26:2 (40)	diene
41	3-Me-C25/ 9-C26:1 (41)	x-methyl / monoene	0.55 (P = 0.0348)	0.199 (P = 0.239)	0.094 (P = 0.7644)	0.146 (P = 0.5583)	7.2 (P = 0.0081)	-0.04 (P = 0.8855)	0.63 (P = 0.0301)	-0.289 (P = 0.2316)	-1.11 (P = 0.0385)	0.795 (P = 0.1234)	10.2 (P = <.0001)	0.026 (P = 0.9316)	-1.83 (P = 0.0045)	-1.79 (P = 0.0029)	-0.421 (P = 0.4035)	-1.73 (P = 0.004)	-0.85 (P = 0.0892)	5.13 (P = 0.01)	0.74 (P = 0.195)	0.43 (P = 0.3882)	6.18 (P = 0.0099)	3.15 (P = 0.0121)	4.21 (P = 0.0045)	-2.72 (P = 0.0012)	3-Me-C25/ 9-C26:1 (41)	x-methyl / monoene
42	7-C26:1 (42)	monoene	0.14 (P = 0.5267)	0.005727 (P = 0.9729)	-0.08 (P = 0.7955)	0.255 (P = 0.3394)	5.88 (P = 0.0317)	-0.23 (P = 0.4335)	0.07 (P = 0.7776)	-0.283 (P = 0.1622)	-1.49 (P = 0.0109)	-1.18 (P = 0.0139)	5.84 (P = 0.0002)	-1.02 (P = 0.0131)	-2.05 (P = 0.0012)	-2.07 (P = 0.0008)	-1.25 (P = 0.0269)	-2.12 (P = 0.0007)	-0.74 (P = 0.0596)	5.05 (P = 0.0093)	0.43 (P = 0.4329)	0.02 (P = 0.97)	6.25 (P = 0.0121)	2.23 (P = 0.0207)	3.56 (P = 0.0082)	-7.41 (P = 0.0002)	7-C26:1 (42)	monoene
44	n-C26 (44)	n-alkane	1.02 (P = 0.3444)	-1.66 (P = 0.2322)	-0.65 (P = 0.6033)	-0.66 (P = 0.6881)	37.7 (P = 0.002)	-1.3 (P = 0.2335)	2.06 (P = 0.123)	-1.22 (P = 0.3337)	-3 (P = 0.0607)	-5.13 (P = 0.0048)	27.4 (P = 0.0001)	-2.08 (P = 0.11)	-5.37 (P = 0.0032)	-6.01 (P = 0.0015)	-3.88 (P = 0.026)	-5.5 (P = 0.0023)	-4.02 (P = 0.007)	12.8 (P = 0.047)	-0.45 (P = 0.7297)	-1.09 (P = 0.4961)	16.6 (P = 0.0047)	3.3 (P = 0.1285)	9.6 (P = 0.0159)	-1.41 (P = 0.2325)	n-C26 (44)	n-alkane
45	9,13-C27:2 (45)	diene	1.84 (P = 0.0455)	-0.37 (P = 0.2748)	0.521 (P = 0.5273)	1.33 (P = 0.0923)	14.1 (P = 0.0123)	0.118 (P = 0.8772)	0.67 (P = 0.3536)	1.23 (P = 0.0785)	-1.53 (P = 0.2506)	0.493 (P = 0.6197)	23.7 (P = 0.0004)	2.66 (P = 0.082)	-1.49 (P = 0.2091)	-0.06 (P = 0.9402)	3.95 (P = 0.0542)	-2.02 (P = 0.075)	-2.66 (P = 0.0561)	13.1 (P = 0.0128)	0.3 (P = 0.826)	-1.62 (P = 0.2468)	15.7 (P = 0.0075)	8.78 (P = 0.0297)	8.84 (P = 0.0137)	-2.97 (P = 0.0432)	9,13-C27:2 (45)	diene
46a	7,11-C27:2/ 2-Me-C26 (46)	2-methyl /diene	107 (P = 0.0065)	17.8 (P = 0.389)	43.6 (P = 0.4135)	26.2 (P = 0.5338)	1155.9 (P = 0.0034)	45.1 (P = 0.4232)	74.5 (P = 0.0606)	55.9 (P = 0.1004)	74 (P = 0.2967)	8.09 (P = 0.8403)	1294.5 (P = <.0001)	277.1 (P = 0.0057)	1.6 (P = 0.9682)	-29.7 (P = 0.4024)	214.7 (P = 0.0174)	-3.21 (P = 0.9285)	-58.8 (P = 0.308)	496.7 (P = 0.0196)	-18 (P = 0.6676)	-88.1 (P = 0.0796)	520.6 (P = 0.0236)	384.1 (P = 0.0259)	310.6 (P = 0.0192)	-221.2 (P = 0.0101)	7,11-C27:2 (46a)	diene
46b	*CG10097 only		NA	NA	NA	NA	NA	NA	NA	NA	NA	NA	NA	NA	NA	NA	NA	NA	NA	NA	NA	NA	NA	NA	NA	24.6 (P = 0.2553)	2-Me-C26 (46b)	2-methyl
47	5,9-C27:2/ 9-C27:1 (47)	diene / monoene	-0.734 (P = 0.8196)	4.66 (P = 0.1822)	2.11 (P = 0.62)	-4.38 (P = 0.116)	79.5 (P = 0.0338)	-0.96 (P = 0.801)	2.36 (P = 0.6312)	-3.89 (P = 0.2685)	-34.2 (P = 0.0083)	-24.7 (P = 0.0144)	118 (P = 0.0002)	-16.8 (P = 0.0389)	-43.5 (P = 0.0017)	-41.5 (P = 0.0013)	-20.6 (P = 0.0624)	-41.6 (P = 0.0012)	-22.7 (P = 0.0259)	97.4 (P = 0.0065)	9.17 (P = 0.1587)	0.62 (P = 0.8982)	126.9 (P = 0.0044)	53.3 (P = 0.0096)	61.4 (P = 0.0058)	-34.5 (P = 0.0232)	5,9-C27:2/ 9-C27:1 (47)	diene / monoene
48	7-C27:1 (48)	monoene	-1.91 (P = 0.3393)	5.82 (P = 0.029)	0.034 (P = 0.9883)	-11.7 (P = 0.0005)	72.6 (P = 0.0302)	-1.49 (P = 0.4922)	3.74 (P = 0.321)	-4.32 (P = 0.0948)	-33.7 (P = 0.0122)	-12.8 (P = 0.1271)	135.2 (P = 0.0002)	-3.48 (P = 0.6605)	-36.4 (P = 0.0054)	-37.5 (P = 0.0044)	-22.8 (P = 0.0475)	-31.1 (P = 0.008)	-22.1 (P = 0.0433)	126.5 (P = 0.0024)	29.3 (P = 0.0072)	14 (P = 0.0555)	142.2 (P = 0.002)	47.9 (P = 0.0037)	72 (P = 0.0072)	-26.5 (P = 0.0775)	7-C27:1 (48)	monoene
49	5-C27:1 (49)	monoene	-0.676 (P = 0.0014)	0.162 (P = 0.6299)	-0.29 (P = 0.3893)	-1.74 (P = 0.0009)	6.38 (P = 0.0037)	-0.47 (P = 0.0205)	-0.366 (P = 0.1825)	-0.836 (P = 0.0372)	-5.15 (P = 0.0086)	-4.25 (P = 0.0123)	8.32 (P = 0.003)	-3.85 (P = 0.0171)	-6.61 (P = 0.0028)	-6.27 (P = 0.0037)	-4.96 (P = 0.011)	-6.21 (P = 0.003)	-3.57 (P = 0.0601)	8.59 (P = 0.0006)	2.59 (P = 0.0327)	2.2 (P = 0.0356)	11.8 (P = 0.0041)	6.79 (P = 0.004)	6.65 (P = 0.0174)	-0.51 (P = 0.5268)	5-C27:1 (49)	monoene
50	n-C27 (50)	n-alkane	1.06 (P = 0.8496)	-10.6 (P = 0.1815)	-7.34 (P = 0.3302)	-9.06 (P = 0.3433)	251.7 (P = 0.0006)	-2.17 (P = 0.7008)	9.61 (P = 0.187)	-1.83 (P = 0.7594)	-38.6 (P = 0.0142)	-59.3 (P = 0.0016)	206 (P = 0.0002)	-24 (P = 0.0567)	-48.3 (P = 0.0034)	-46.6 (P = 0.0038)	-28 (P = 0.0573)	-47.9 (P = 0.0032)	-37.6 (P = 0.009)	112.4 (P = 0.0168)	3.46 (P = 0.6447)	-1.61 (P = 0.8202)	144.5 (P = 0.0072)	37.2 (P = 0.0292)	69 (P = 0.0091)	34.1 (P = 0.0012)	n-C27 (50)	n-alkane
51	8,12-C28:2 (51)	diene	0.95 (P = 0.2183)	0.537 (P = 0.2405)	0.537 (P = 0.5377)	0.428 (P = 0.536)	10.4 (P = 0.041)	0.052 (P = 0.9447)	0.78 (P = 0.2238)	-0.052 (P = 0.9116)	-1.13 (P = 0.0882)	-0.32 (P = 0.4873)	12.7 (P = 0.0004)	0.519 (P = 0.2894)	-1.64 (P = 0.0147)	-0.94 (P = 0.0492)	-0.04 (P = 0.9447)	-1.17 (P = 0.0259)	-0.88 (P = 0.0895)	7.07 (P = 0.0192)	-1.77 (P = 0.0122)	-3.27 (P = 0.0008)	6.45 (P = 0.0792)	0.242 (P = 0.7345)	2.87 (P = 0.079)	-7.03 (P = 0.0005)	8,12-C28:2 (51)	diene
52	7,11-C28:2/ 2-Me-C27 (52)	diene / 2-methyl	1.23 (P = 0.0465)	3.16 (P = 0.0052)	0.639 (P = 0.5281)	0.594 (P = 0.3199)	22.1 (P = 0.0073)	0.627 (P = 0.5105)	1.27 (P = 0.1173)	-0.443 (P = 0.3678)	-3.84 (P = 0.0293)	-4.09 (P = 0.0088)	31.9 (P = 0.0002)	0.207 (P = 0.8157)	-5.36 (P = 0.0022)	-3.39 (P = 0.0061)	-1.38 (P = 0.3678)	-4.36 (P = 0.002)	-3.45 (P = 0.0263)	16.3 (P = 0.0081)	0.64 (P = 0.4362)	-1.86 (P = 0.0421)	13.2 (P = 0.0218)	5.48 (P = 0.0259)	8.93 (P = 0.0112)	-2.12 (P = 0.0619)	7,11-C28:2/ 2-Me-C27 (52)	diene / 2-methyl
53	3-Me-C27 / 6,10-C28:2/ 9-C28:1 (53)	x-methyl / diene / monoene	0.46 (P = 0.3423)	2.26 (P = 0.0106)	0.683 (P = 0.3526)	-0.49 (P = 0.1995)	6.8 (P = 0.0357)	0.019 (P = 0.9718)	0.52 (P = 0.2263)	-0.537 (P = 0.1726)	-0.6 (P = 0.279)	-0.94 (P = 0.0484)	11.6 (P = 0.0003)	0.893 (P = 0.1273)	-1.72 (P = 0.0043)	-0.69 (P = 0.0683)	-0.273 (P = 0.5001)	-0.7 (P = 0.0586)	-0.29 (P = 0.4363)	5.07 (P = 0.0259)	-1.46 (P = 0.0044)	-2.46 (P = 0.0002)	4.5 (P = 0.0952)	0.768 (P = 0.2372)	3.04 (P = 0.0342)	-6.95 (P = 0.0002)	3-Me-C27 / 6,10-C28:2/ 9-C28:1 (53)	x-methyl / diene / monoene
54	NI (54)	NI	0.6 (P = 0.0468)	0.519 (P = 0.2163)	-0.27 (P = 0.4512)	-0.12 (P = 0.7427)	9.01 (P = 0.0335)	-0.1 (P = 0.752)	1.18 (P = 0.1156)	-0.56 (P = 0.148)	-1.83 (P = 0.002)	-1.14 (P = 0.0649)	13.2 (P = 0.0003)	-1.19 (P = 0.0101)	-2.03 (P = 0.0012)	-2.14 (P = 0.0011)	-1.02 (P = 0.1159)	-1.48 (P = 0.0018)	-1.14 (P = 0.0114)	3.41 (P = 0.0095)	1.11 (P = 0.0153)	-0.268 (P = 0.3111)	2.12 (P = 0.0069)	0.474 (P = 0.1888)	3.39 (P = 0.0022)	0.776 (P = 0.2101)	NI (54)	NI
55	n-C28 (55)	n-alkane	0.02 (P = 0.9555)	0.346 (P = 0.6191)	-0.96 (P = 0.1476)	1.07 (P = 0.3806)	16.8 (P = 0.0028)	-0.36 (P = 0.4346)	1.37 (P = 0.0441)	1.33 (P = 0.0317)	-2.39 (P = 0.0324)	-5.38 (P = 0.0008)	16.5 (P = 0.0009)	-3.17 (P = 0.0112)	-3.9 (P = 0.0038)	-3.5 (P = 0.0057)	-3.11 (P = 0.0192)	-3.65 (P = 0.0043)	-2.81 (P = 0.0096)	7.11 (P = 0.0346)	-1.99 (P = 0.0287)	-2.85 (P = 0.0089)	7.49 (P = 0.0337)	-1.03 (P = 0.2635)	3.17 (P = 0.0685)	0.995 (P = 0.0077)	n-C28 (55)	n-alkane
57a	2-Me-C28/ 7,11-C29:2 (57)	2-methyl/ diene	32 (P = 0.0161)	103.3 (P = 0.0032)	14.8 (P = 0.569)	8.82 (P = 0.5365)	719.5 (P = 0.0059)	20.9 (P = 0.4042)	37.3 (P = 0.1021)	-4.11 (P = 0.7383)	-12.5 (P = 0.6498)	-84.1 (P = 0.0067)	858.9 (P = <.0001)	28.5 (P = 0.2688)	-76.9 (P = 0.0087)	-41.4 (P = 0.0401)	1.64 (P = 0.9539)	-37.5 (P = 0.0528)	-51.5 (P = 0.0521)	356.7 (P = 0.0164)	-37.2 (P = 0.1398)	-46.7 (P = 0.0726)	453.8 (P = 0.0106)	111.9 (P = 0.0329)	139.7 (P = 0.0327)	82.3 (P = 0.014)	2-Me-C28 (57a)	2-methyl
57b	*CG10097 only		NA	NA	NA	NA	NA	NA	NA	NA	NA	NA	NA	NA	NA	NA	NA	NA	NA	NA	NA	NA	NA	NA	NA	-100 (P = 0.0008)	7,11-C29:2 (57b)	diene
58	5,9-C29:2/ 9-C29:1 (58)	diene / monoene	0.36 (P = 0.3033)	1.36 (P = 0.0128)	-0.06 (P = 0.9072)	-0.1 (P = 0.8103)	20.5 (P = 0.0194)	-0.00717 (P = 0.9867)	0.06 (P = 0.9091)	-0.313 (P = 0.3852)	-21.3 (P = 0.0022)	-16.3 (P = 0.0064)	24.3 (P = 0.0064)	-13.9 (P = 0.0069)	-24.8 (P = 0.0009)	-20.8 (P = 0.0025)	-16.7 (P = 0.0112)	-22.3 (P = 0.0014)	-10.7 (P = 0.0554)	33.7 (P = 0.0007)	12.9 (P = 0.0185)	9.07 (P = 0.0028)	48.8 (P = 0.0036)	23.8 (P = 0.0014)	26 (P = 0.0148)	-0.11 (P = 0.8888)	5,9-C29:2/ 9-C29:1 (58)	diene / monoene
59	7-C29:1 (59)	monoene	0.5 (P = 0.0958)	1.81 (P = 0.0037)	-0.41 (P = 0.2766)	-1.09 (P = 0.0428)	32.6 (P = 0.0026)	-0.03 (P = 0.911)	0.13 (P = 0.7542)	0.12 (P = 0.6889)	-24.6 (P = 0.0063)	-15 (P = 0.0277)	42.9 (P = 0.0026)	-18.7 (P = 0.013)	-25.8 (P = 0.0053)	-24.9 (P = 0.0051)	-19.3 (P = 0.0202)	-23.3 (P = 0.0072)	-10.7 (P = 0.0871)	51.3 (P = 0.0017)	19.3 (P = 0.0006)	11.8 (P = 0.0041)	63.2 (P = 0.0015)	29.5 (P = 0.0019)	39.4 (P = 0.0016)	1.86 (P = 0.1098)	7-C29:1 (59)	monoene
60	n-C29 (60)	n-alkane	1.5 (P = 0.2805)	2.72 (P = 0.2552)	-1.79 (P = 0.363)	5.38 (P = 0.2551)	94.9 (P = 0.0013)	0.494 (P = 0.7289)	3.27 (P = 0.146)	5.39 (P = 0.0462)	-22.9 (P = 0.0059)	-27.8 (P = 0.0014)	108.2 (P = 0.0007)	-18.9 (P = 0.0094)	-29.2 (P = 0.0013)	-22.5 (P = 0.0038)	-17.6 (P = 0.0277)	-24.5 (P = 0.0028)	-16.4 (P = 0.0102)	46.7 (P = 0.01)	2.87 (P = 0.4498)	-1.71 (P = 0.6099)	64.8 (P = 0.0082)	15.9 (P = 0.025)	29.2 (P = 0.0173)	10.1 (P = 0.0009)	n-C29 (60)	n-alkane
61	2-Me-C29 / 8,12-C30:2 (61)	2-methyl / diene	0.37 (P = 0.4379)	0.525 (P = 0.3768)	-0.01 (P = 0.9789)	0.152 (P = 0.7855)	5.73 (P = 0.0085)	-0.24 (P = 0.6237)	0.39 (P = 0.4502)	0.27 (P = 0.5715)	-0.85 (P = 0.0009)	-0.7 (P = 0.0026)	4.15 (P = 0.0006)	-0.38 (P = 0.0222)	-0.91 (P = 0.0056)	-0.66 (P = 0.0025)	-0.473 (P = 0.1781)	-0.75 (P = 0.0008)	-0.75 (P = 0.0171)	1.18 (P = 0.2123)	-0.637 (P = 0.3939)	-1.01 (P = 0.2033)	0.392 (P = 0.5932)	-0.6 (P = 0.4224)	-0.37 (P = 0.6227)	0.1 (P = 0.6327)	2-Me-C29 / 8,12-C30:2 (61)	2-methyl / diene
62	2-Me-C30 (62)	2-methyl	4.06 (P = 0.0637)	7.96 (P = 0.0331)	-0.43 (P = 0.8011)	11.3 (P = 0.0526)	104.8 (P = 0.0007)	1.52 (P = 0.4448)	4.01 (P = 0.1208)	3.94 (P = 0.1061)	-4.91 (P = 0.1147)	-8.79 (P = 0.0113)	104.5 (P = 0.0012)	-1.39 (P = 0.6686)	-3.73 (P = 0.2585)	-4.23 (P = 0.1287)	1.45 (P = 0.7254)	-1.69 (P = 0.5613)	-4.62 (P = 0.061)	17.6 (P = 0.0802)	-6.73 (P = 0.1968)	-6.82 (P = 0.2229)	32.8 (P = 0.0025)	-0.76 (P = 0.8799)	5.27 (P = 0.3903)	26.2 (P = 0.0003)	2-Me-C30 (62)	2-methyl
63	7,11-C31:2 (63)	diene	0.28 (P = 0.4501)	2.89 (P = 0.0023)	-0.00316 (P = 0.9953)	0.5 (P = 0.3654)	20.7 (P = 0.0343)	0.393 (P = 0.5852)	-0.002359 (P = 0.9964)	-0.69 (P = 0.1522)	-0.35 (P = 0.2926)	0.563 (P = 0.1767)	18.7 (P = 0.0012)	0.349 (P = 0.4669)	-0.57 (P = 0.2918)	0.286 (P = 0.43)	0.8 (P = 0.1165)	-0.61 (P = 0.1103)	-1.19 (P = 0.0101)	13 (P = 0.0077)	-0.797 (P = 0.3354)	-1.52 (P = 0.0885)	20 (P = 0.0387)	0.705 (P = 0.4835)	0.367 (P = 0.8145)	1.07 (P = 0.2309)	7,11-C31:2 (63)	diene
64	n-C31 (64)	n-alkane	0.76 (P = 0.023)	1.03 (P = 0.0416)	0.334 (P = 0.2692)	0.877 (P = 0.1759)	21.6 (P = 0.0006)	0.289 (P = 0.3347)	0.67 (P = 0.0809)	0.79 (P = 0.05)	-3.23 (P = 0.0065)	-2.36 (P = 0.0189)	21.2 (P = 0.0019)	-2.29 (P = 0.0342)	-2.97 (P = 0.0134)	-2.82 (P = 0.0074)	-0.908 (P = 0.4524)	-2.44 (P = 0.0275)	-2.83 (P = 0.0056)	6.26 (P = 0.0064)	0.27 (P = 0.7376)	-0.821 (P = 0.327)	11.3 (P = 0.0004)	1.63 (P = 0.1549)	2.81 (P = 0.0593)	4.3 (P = 0.0008)	n-C31 (64)	n-alkane
ug/fly	Total CHCs (ng/fly)	Total CHCs(ng/fly)	245.9 (P = 0.0095)	88.2 (P = 0.2334)	57.4 (P = 0.639)	-61.3 (P = 0.5692)	4182.2 (P = 0.0028)	83.7 (P = 0.5206)	285.4 (P = 0.0387)	77.9 (P = 0.3103)	-232.6 (P = 0.3286)	-262.4 (P = 0.1382)	4688.7 (P = <.0001)	335.9 (P = 0.1144)	-452.5 (P = 0.0289)	-518.5 (P = 0.0106)	145.7 (P = 0.5197)	-471.8 (P = 0.0162)	-472.8 (P = 0.0405)	2352.5 (P = 0.0133)	135.7 (P = 0.3539)	-132.2 (P = 0.3265)	2647.3 (P = 0.0136)	1295.9 (P = 0.0131)	1296.7 (P = 0.0078)	-264.9 (P = 0.0756)	Total CHCs (ug/fly)	Total CHCs(ng/fly)

## Sheet: B
Peak #	CHC (#)	CHC Type	app	CG13091	CG16979	CG30008	CG8680	Desi	Lip2	PHGPx	Cyp9f2	CG18609	CG5599	CG7724	Irc	CG9458	Nrt	CG9801	Cyp49a1	Pxd	Prx6005	pxn	Cyp4s3	CG14688	CG8814	CG10097
1	n-C21 (1)	n-alkane	2.1 (P = 0.4181)	0.889 (P = 0.7067)	6.93 (P = 0.0331)	1.2 (P = 0.787)	69.3 (P = 0.0032)	3.01 (P = 0.2807)	-1.75 (P = 0.5164)	1.35 (P = 0.5651)	20.2 (P = 0.0273)	12.1 (P = 0.0041)	100.8 (P = 0.0028)	9.55 (P = 0.0079)	27.6 (P = <.0001)	18.1 (P = 0.017)	14.9 (P = 0.0021)	23.3 (P = 0.0232)	4.28 (P = 0.1522)	14.8 (P = 0.0178)	24 (P = 0.0073)	11.7 (P = 0.0085)	53.9 (P = 0.0028)	23.6 (P = 0.0082)	18.5 (P = 0.0267)	-21.7 (P = 0.0015)
2	x-C22:1 (2)	monoene	1.02 (P = 0.1534)	0.397 (P = 0.5949)	2.12 (P = 0.0408)	-1.2 (P = 0.0786)	10.6 (P = 0.0077)	1.25 (P = 0.0885)	1.45 (P = 0.173)	1.29 (P = 0.0502)	4.44 (P = 0.0174)	2.85 (P = 0.0045)	23.6 (P = 0.0022)	2.78 (P = 0.0096)	6.22 (P = <.0001)	6.73 (P = 0.0111)	4.14 (P = 0.0019)	6.97 (P = 0.0112)	0.821 (P = 0.2935)	4.35 (P = 0.0127)	5.22 (P = 0.0095)	3.48 (P = 0.0056)	10.4 (P = 0.0032)	6.89 (P = 0.0083)	6.35 (P = 0.0098)	-5.7 (P = 0.0025)
3	x-C22:1 (3)	monoene	0.09 (P = 0.392)	-0.32 (P = 0.0162)	0.411 (P = 0.0457)	1.73 (P = 0.0266)	2.24 (P = 0.0064)	0.071 (P = 0.4358)	0.19 (P = 0.2422)	0.23 (P = 0.0808)	1.35 (P = 0.0151)	0.312 (P = 0.1583)	4.82 (P = 0.0015)	0.559 (P = 0.0645)	1.25 (P = 0.002)	1.3 (P = 0.0308)	0.99 (P = 0.0105)	1.52 (P = 0.0184)	0.179 (P = 0.4014)	1.92 (P = 0.0042)	1.73 (P = 0.0005)	1.9 (P = 0.0028)	3.54 (P = 0.0007)	3.14 (P = 0.0004)	2.77 (P = 0.0022)	-1.95 (P = 0.0011)
4	n-C22 (4)	n-alkane	5.57 (P = 0.1523)	2.29 (P = 0.3847)	9.78 (P = 0.0211)	-2.13 (P = 0.6175)	71 (P = 0.0032)	5.03 (P = 0.1671)	-1.89 (P = 0.6202)	8.39 (P = 0.0572)	19.3 (P = 0.0328)	14.9 (P = 0.0092)	83.3 (P = 0.0038)	3.22 (P = 0.3084)	14.7 (P = 0.0044)	18.8 (P = 0.0242)	4.23 (P = 0.214)	17.7 (P = 0.0436)	6.86 (P = 0.0759)	21.2 (P = 0.0311)	26.8 (P = 0.0258)	15.2 (P = 0.058)	51.1 (P = 0.0066)	13.4 (P = 0.087)	35 (P = 0.0186)	-7.51 (P = 0.0587)
6	2-Me-C22 (6)	2-methyl	-0.577 (P = 0.2623)	0.652 (P = 0.1004)	1.88 (P = 0.0114)	2.97 (P = 0.005)	16.1 (P = 0.0021)	-0.16 (P = 0.5857)	3.59 (P = 0.01)	0.52 (P = 0.2968)	3.07 (P = 0.0503)	1.35 (P = 0.0418)	17.8 (P = 0.005)	2.56 (P = 0.0139)	4.92 (P = 0.0004)	10.6 (P = 0.0043)	2.85 (P = 0.0022)	2.61 (P = 0.0409)	0.429 (P = 0.6272)	2.59 (P = 0.0206)	0.1 (P = 0.8168)	2.62 (P = 0.0492)	3.72 (P = 0.0003)	5.82 (P = 0.0027)	1.5 (P = 0.0277)	-2.91 (P = 0.002)
7	NI (7)	NI	0.34 (P = 0.0182)	-0.02 (P = 0.8815)	0.595 (P = 0.0094)	-0.33 (P = 0.0295)	2.74 (P = 0.0042)	0.276 (P = 0.0378)	0.18 (P = 0.3224)	0.27 (P = 0.0571)	1.74 (P = 0.0152)	1.45 (P = 0.0009)	12.7 (P = 0.037)	0.69 (P = 0.0017)	2.73 (P = <.0001)	2.79 (P = 0.004)	1.81 (P = 0.0003)	2.97 (P = 0.0038)	1.21 (P = 0.0169)	2.14 (P = 0.0174)	4.71 (P = 0.0048)	2.22 (P = 0.0049)	6.04 (P = 0.0044)	5.18 (P = 0.0122)	3.68 (P = 0.0049)	-1.2 (P = 0.3279)
8	9-C23:1 (8)	monoene	5.48 (P = 0.1756)	8.46 (P = 0.19)	14.9 (P = 0.023)	-17.3 (P = 0.0021)	78.7 (P = 0.0069)	9.07 (P = 0.0569)	7.38 (P = 0.2222)	11.7 (P = 0.0253)	25 (P = 0.0461)	22.5 (P = 0.0053)	148.6 (P = 0.0024)	5.27 (P = 0.2671)	49.3 (P = 0.0002)	37.9 (P = 0.0163)	20.4 (P = 0.0046)	45.7 (P = 0.012)	5.25 (P = 0.3651)	24.3 (P = 0.0228)	45.3 (P = 0.0161)	22.3 (P = 0.0143)	85.9 (P = 0.0032)	45.8 (P = 0.0207)	48.3 (P = 0.0088)	-25.2 (P = 0.0186)
9	7-C23:1 (9)	monoene	84.6 (P = 0.1114)	25 (P = 0.6449)	187.4 (P = 0.0374)	-129 (P = 0.0142)	696.7 (P = 0.0078)	105.7 (P = 0.0714)	113 (P = 0.1758)	113.4 (P = 0.0456)	266 (P = 0.0231)	181.9 (P = 0.0079)	1378.8 (P = 0.0016)	161.6 (P = 0.0125)	445 (P = 0.0003)	394 (P = 0.0133)	230.6 (P = 0.0026)	447.2 (P = 0.0103)	104.9 (P = 0.0965)	245.3 (P = 0.0154)	342.5 (P = 0.0268)	164.9 (P = 0.0198)	636.4 (P = 0.0037)	298.6 (P = 0.0236)	372.9 (P = 0.0147)	-320.2 (P = 0.0061)
10	6-C23:1 (10)	monoene	0.89 (P = 0.16)	0.581 (P = 0.255)	1.48 (P = 0.0155)	-1.55 (P = 0.005)	4.66 (P = 0.0062)	1.04 (P = 0.0611)	1.11 (P = 0.1209)	1 (P = 0.0768)	-11.5 (P = 0.1326)	-12.1 (P = 0.0906)	18.4 (P = 0.0393)	-14.3 (P = 0.0689)	-3.58 (P = 0.5702)	-4.35 (P = 0.6693)	-12.1 (P = 0.0824)	-3.84 (P = 0.6366)	1.33 (P = 0.837)	19.2 (P = 0.0126)	26 (P = 0.0084)	19.5 (P = 0.0016)	32 (P = 0.002)	21.9 (P = 0.0059)	23.4 (P = 0.002)	4.33 (P = 0.032)
11	5-C23:1 (11)	monoene	6.21 (P = 0.1321)	0.074 (P = 0.9858)	8.41 (P = 0.0807)	-17.3 (P = 0.0006)	62.3 (P = 0.0074)	7.48 (P = 0.0855)	6.85 (P = 0.2171)	6.15 (P = 0.0946)	14.4 (P = 0.0621)	11.6 (P = 0.0319)	118.4 (P = 0.0015)	8.9 (P = 0.0809)	32.1 (P = 0.001)	22.1 (P = 0.0369)	12.3 (P = 0.0214)	37.5 (P = 0.0131)	5.86 (P = 0.2085)	30.1 (P = 0.0029)	37.3 (P = 0.0125)	20.3 (P = 0.0068)	65.5 (P = 0.0019)	21.5 (P = 0.019)	32.4 (P = 0.0167)	-15.1 (P = 0.0071)
13	n-C23 (13)	n-alkane	35.8 (P = 0.1212)	8.2 (P = 0.4823)	45.6 (P = 0.0273)	-166.3 (P = <.0001)	378.3 (P = 0.0032)	58.5 (P = 0.0211)	16.3 (P = 0.4342)	48.1 (P = 0.0677)	78.5 (P = 0.082)	117 (P = 0.0037)	642 (P = 0.001)	39.5 (P = 0.0959)	97.9 (P = 0.0022)	107.4 (P = 0.026)	32.4 (P = 0.1125)	120.3 (P = 0.0318)	48.3 (P = 0.0415)	50.9 (P = 0.0712)	91.5 (P = 0.0931)	43.5 (P = 0.0983)	217.7 (P = 0.006)	15.7 (P = 0.6085)	88.4 (P = 0.0631)	7.33 (P = 0.6264)
16	x,y-C24:2 (16)	diene	-0.126 (P = 0.1618)	-0.29 (P = 0.0032)	0.474 (P = 0.0109)	0.979 (P = 0.0005)	3.2 (P = 0.0027)	0.053 (P = 0.6771)	1.18 (P = 0.016)	0.34 (P = 0.0132)	1.72 (P = 0.0158)	1.89 (P = 0.0034)	9.48 (P = 0.0004)	0.958 (P = 0.0298)	2.84 (P = 0.0005)	2.71 (P = 0.0073)	1.57 (P = 0.0082)	2.88 (P = 0.004)	0.137 (P = 0.7243)	2.82 (P = 0.0141)	3.29 (P = 0.0166)	3.03 (P = 0.0002)	6.17 (P = 0.0019)	3.17 (P = 0.001)	3.91 (P = 0.0022)	-1.74 (P = 0.005)
17	3-Me-C23 (17)	x-methyl	0.51 (P = 0.0659)	-0.07 (P = 0.5798)	0.853 (P = 0.0187)	0.408 (P = 0.3068)	6.15 (P = 0.0045)	0.544 (P = 0.0537)	0.99 (P = 0.0105)	0.73 (P = 0.0191)	16.6 (P = 0.0085)	15 (P = 0.0063)	39.7 (P = 0.0202)	9.56 (P = 0.0265)	21.2 (P = 0.0015)	18.5 (P = 0.0094)	11.9 (P = 0.0125)	21.6 (P = 0.0048)	-3.33 (P = 0.2783)	18 (P = 0.0585)	20 (P = 0.0436)	17.7 (P = 0.0087)	36.6 (P = 0.0026)	19.9 (P = 0.0086)	32.5 (P = 0.0041)	-0.68 (P = 0.1789)
18	7-C24:1 (18)	monoene	3.26 (P = 0.1158)	3.57 (P = 0.2046)	6.12 (P = 0.0545)	-6.29 (P = 0.0052)	25.8 (P = 0.008)	3.26 (P = 0.1095)	2.35 (P = 0.2972)	5.6 (P = 0.0253)	-2.05 (P = 0.4043)	-1.68 (P = 0.4591)	19.5 (P = 0.005)	-3.4 (P = 0.1698)	0.778 (P = 0.7221)	1.2 (P = 0.6476)	-2.55 (P = 0.2755)	1.49 (P = 0.5618)	7.83 (P = 0.0356)	-1.58 (P = 0.8094)	2.66 (P = 0.7783)	-6.86 (P = 0.2477)	-0.55 (P = 0.9212)	-6.4 (P = 0.2813)	-3.62 (P = 0.5236)	-11.3 (P = 0.0094)
19	6-C24:1 (19)	monoene	1.33 (P = 0.0622)	2.79 (P = 0.0517)	1.85 (P = 0.043)	-2.58 (P = 0.0009)	8.76 (P = 0.0084)	1.51 (P = 0.0513)	1.56 (P = 0.1081)	1.61 (P = 0.0198)	6.6 (P = 0.0076)	4.12 (P = 0.0087)	24.4 (P = 0.0018)	3.08 (P = 0.0347)	9.67 (P = 0.0005)	8.62 (P = 0.0159)	4.95 (P = 0.0037)	10.2 (P = 0.0058)	1.53 (P = 0.1644)	10.1 (P = 0.0161)	10.2 (P = 0.0023)	7.03 (P = 0.0068)	16 (P = 0.0019)	8.77 (P = 0.0009)	13.9 (P = 0.0033)	-2.12 (P = 0.0518)
21	5-C24:1 (21)	monoene	1.31 (P = 0.2794)	2.83 (P = 0.1191)	2.83 (P = 0.065)	-4.49 (P = 0.0027)	12.6 (P = 0.009)	0.911 (P = 0.3936)	1.35 (P = 0.2523)	2.48 (P = 0.0448)	-4.88 (P = 0.08)	-5.06 (P = 0.0722)	2.07 (P = 0.754)	-5.04 (P = 0.0733)	-4.52 (P = 0.0967)	-4.69 (P = 0.0886)	-4.98 (P = 0.0754)	-4.71 (P = 0.0873)	5.44 (P = 0.0748)	-2.31 (P = 0.6103)	-0.908 (P = 0.8782)	-5.72 (P = 0.1082)	-4.98 (P = 0.1473)	-5.78 (P = 0.1049)	-5.57 (P = 0.1148)	-4.91 (P = 0.0068)
22	n-C24 (22)	n-alkane	1.68 (P = 0.1145)	0.8 (P = 0.2029)	1.64 (P = 0.0671)	-3.7 (P = 0.0036)	12.4 (P = 0.0066)	2.21 (P = 0.0289)	0.24 (P = 0.8202)	3.09 (P = 0.0262)	3.27 (P = 0.068)	5.35 (P = 0.0064)	21.8 (P = 0.0018)	-0.73 (P = 0.4601)	1.44 (P = 0.1338)	2.44 (P = 0.1263)	-1.19 (P = 0.2216)	3.39 (P = 0.0715)	2.44 (P = 0.0398)	-0.112 (P = 0.9229)	1.41 (P = 0.5455)	-1.56 (P = 0.2091)	3.92 (P = 0.0953)	-4.48 (P = 0.0161)	4.06 (P = 0.0972)	0.079 (P = 0.9358)
25	2-Me-C24 (25)	2-methyl	-5.85 (P = 0.1164)	-12.7 (P = 0.0004)	13.5 (P = 0.0029)	13.3 (P = 0.0046)	65 (P = 0.0008)	-0.69 (P = 0.698)	28.5 (P = 0.0034)	8.43 (P = 0.0201)	11.8 (P = 0.1142)	78.7 (P = <.0001)	110.8 (P = 0.0032)	11.6 (P = 0.0223)	23.5 (P = 0.0005)	10.5 (P = 0.0758)	9.67 (P = 0.0179)	15.2 (P = 0.0227)	4.58 (P = 0.4734)	-7.5 (P = 0.118)	-15.5 (P = 0.0413)	4.98 (P = 0.5614)	-0.85 (P = 0.8407)	44.9 (P = 0.0172)	1.05 (P = 0.8804)	-46.1 (P = 0.001)
26	6,10-C25:2 (26)	diene	1.66 (P = 0.03)	1.44 (P = 0.1278)	1.25 (P = 0.0648)	-1.52 (P = 0.0013)	12.8 (P = 0.0142)	1.28 (P = 0.0664)	0.31 (P = 0.5306)	0.69 (P = 0.1241)	5.75 (P = 0.0086)	4.83 (P = 0.0013)	40.6 (P = 0.0024)	1.19 (P = 0.0096)	7.46 (P = 0.0003)	8.71 (P = 0.0035)	2.99 (P = 0.0015)	9.81 (P = 0.0023)	5 (P = 0.0056)	4.33 (P = 0.0484)	11.4 (P = 0.0065)	3.37 (P = 0.0419)	13.1 (P = 0.0054)	5.76 (P = 0.0642)	8.36 (P = 0.0072)	-1.52 (P = 0.7863)
27	9-C25:1 (27)	monoene	7.83 (P = 0.0294)	5.47 (P = 0.1903)	8.58 (P = 0.0453)	-11.5 (P = 0.0008)	52.8 (P = 0.0072)	9.24 (P = 0.0257)	6.75 (P = 0.142)	8.23 (P = 0.016)	14.2 (P = 0.0265)	16.6 (P = 0.0035)	104.6 (P = 0.0014)	2.73 (P = 0.1684)	24.1 (P = 0.0006)	23.6 (P = 0.0093)	5.66 (P = 0.0344)	29.8 (P = 0.0043)	15.3 (P = 0.0052)	10.1 (P = 0.0836)	26.3 (P = 0.0449)	0.66 (P = 0.8615)	32.8 (P = 0.0112)	-6.34 (P = 0.3284)	17.6 (P = 0.0413)	12.8 (P = 0.0422)
29	7-C25:1 (29)	monoene	29.8 (P = 0.0307)	86 (P = 0.0241)	32.1 (P = 0.0495)	-52.2 (P = 0.0004)	137.4 (P = 0.0085)	34 (P = 0.0288)	22.7 (P = 0.1348)	31.6 (P = 0.0178)	38.7 (P = 0.0482)	59.7 (P = 0.0052)	314.3 (P = 0.002)	20.9 (P = 0.0674)	87.4 (P = 0.0013)	96.1 (P = 0.0104)	28 (P = 0.0256)	121.9 (P = 0.0044)	52.3 (P = 0.007)	59.9 (P = 0.0066)	104.3 (P = 0.0246)	26.2 (P = 0.0841)	123.1 (P = 0.0043)	2.33 (P = 0.8725)	77.1 (P = 0.0164)	-5.47 (P = 0.6058)
31	5-C25:1 (31)	monoene	0.6 (P = 0.0256)	7.55 (P = 0.0022)	0.173 (P = 0.4204)	-1.47 (P = 0.0007)	3.13 (P = 0.0051)	0.658 (P = 0.0253)	0.36 (P = 0.1699)	0.52 (P = 0.081)	0.361 (P = 0.5872)	1.09 (P = 0.1446)	8.88 (P = 0.0046)	-0.88 (P = 0.1698)	1.71 (P = 0.0395)	1.8 (P = 0.0775)	-0.676 (P = 0.2172)	2.99 (P = 0.0208)	0.537 (P = 0.3663)	2.05 (P = 0.0053)	3.63 (P = 0.0231)	1.59 (P = 0.0689)	4.82 (P = 0.0043)	0.438 (P = 0.5253)	2.83 (P = 0.0196)	-0.28 (P = 0.1546)
32	n-C25 (32)	n-alkane	8.62 (P = 0.0385)	-3.61 (P = 0.053)	5.9 (P = 0.035)	-21.8 (P = <.0001)	41.4 (P = 0.0055)	10.9 (P = 0.0066)	-0.244 (P = 0.9249)	7.73 (P = 0.0548)	8.98 (P = 0.109)	4.15 (P = 0.2544)	101.4 (P = 0.0011)	0.684 (P = 0.86)	7.35 (P = 0.0511)	10.3 (P = 0.1068)	-0.794 (P = 0.789)	14.8 (P = 0.043)	10.5 (P = 0.0149)	3.51 (P = 0.2195)	9.42 (P = 0.2825)	0.2 (P = 0.9509)	21.7 (P = 0.0143)	-12.7 (P = 0.0323)	10.1 (P = 0.1219)	13.1 (P = 0.0099)
39	2-Me-C25 (39)	2-methyl	-0.148 (P = 0.4426)	0.674 (P = 0.0012)	0.444 (P = 0.0072)	1.81 (P = 0.0006)	3.72 (P = 0.0011)	0.18 (P = 0.1675)	1.44 (P = 0.0081)	0.4 (P = 0.0461)	-0.34 (P = 0.1413)	0.637 (P = 0.0063)	8.1 (P = 0.0048)	0.412 (P = 0.0316)	1.04 (P = 0.0006)	0.421 (P = 0.2603)	0.52 (P = 0.0009)	0.589 (P = 0.0435)	0.217 (P = 0.4409)	-0.462 (P = 0.1369)	-0.665 (P = 0.1683)	-0.508 (P = 0.1848)	-0.49 (P = 0.114)	1.85 (P = 0.0219)	-0.35 (P = 0.4139)	-2.17 (P = 0.0055)
41	3-Me-C25 (41)	x-methyl	0.09 (P = 0.7081)	-0.4 (P = 0.0011)	0.255 (P = 0.0083)	-0.2 (P = 0.062)	2.77 (P = 0.001)	0.151 (P = 0.1522)	0.72 (P = 0.035)	0.2 (P = 0.06)	0.003573 (P = 0.9668)	1.59 (P = <.0001)	3.7 (P = 0.0002)	0.019 (P = 0.7719)	0.681 (P = 0.0002)	0.322 (P = 0.0994)	0.18 (P = 0.0245)	0.743 (P = 0.0037)	0.268 (P = 0.032)	1.1 (P = 0.0484)	1.31 (P = 0.0644)	0.97 (P = 0.0662)	1.73 (P = 0.0159)	1.2 (P = 0.0467)	1.03 (P = 0.0707)	-0.37 (P = 0.0315)
42	7-C26:1 (42)	monoene	0.13 (P = 0.0446)	0.819 (P = 0.0191)	0.171 (P = 0.0798)	-0.3 (P = 0.003)	0.688 (P = 0.0144)	0.193 (P = 0.0504)	0.03 (P = 0.6736)	0.18 (P = 0.0602)	0.154 (P = 0.0633)	0.08 (P = 0.2147)	0.921 (P = 0.0066)	-0.14 (P = 0.039)	0.151 (P = 0.0372)	0.107 (P = 0.2088)	-0.103 (P = 0.0954)	0.155 (P = 0.0852)	0.324 (P = 0.0083)	-0.554 (P = 0.039)	-0.448 (P = 0.1332)	-0.913 (P = 0.0068)	-0.55 (P = 0.0447)	-0.98 (P = 0.0055)	-0.43 (P = 0.0965)	-0.38 (P = 0.0154)
43	6-C26:1/ i (43)	monoene	0.12 (P = 0.0227)	0.826 (P = 0.0034)	0.119 (P = 0.1312)	-0.14 (P = 0.0459)	0.644 (P = 0.1032)	0.071 (P = 0.0234)	0.04 (P = 0.1813)	0.08 (P = 0.0569)	-0.21 (P = 0.0883)	-0.21 (P = 0.0872)	0.871 (P = 0.0138)	-0.26 (P = 0.0428)	-0.11 (P = 0.2753)	-0.04 (P = 0.7308)	-0.233 (P = 0.0592)	0.067 (P = 0.6347)	0.105 (P = 0.332)	-0.055 (P = 0.6108)	-0.044 (P = 0.7401)	-0.239 (P = 0.0937)	-0.17 (P = 0.1336)	-0.28 (P = 0.0887)	-0.13 (P = 0.2497)	-0.15 (P = 0.136)
44	n-C26 (44)	n-alkane	1.15 (P = 0.0235)	0.831 (P = 0.0414)	0.484 (P = 0.1088)	-0.72 (P = 0.0395)	3.04 (P = 0.0154)	1.04 (P = 0.0082)	-0.083 (P = 0.8138)	0.84 (P = 0.0629)	0.913 (P = 0.0468)	-1.6 (P = 0.0034)	5.88 (P = 0.005)	-0.56 (P = 0.1809)	0.183 (P = 0.718)	-0.06 (P = 0.8466)	-0.886 (P = 0.0229)	-0.03 (P = 0.919)	0.935 (P = 0.02)	-0.733 (P = 0.0207)	-0.869 (P = 0.2029)	-2 (P = 0.0028)	-0.44 (P = 0.283)	-3.18 (P = <.0001)	0.183 (P = 0.7148)	0.748 (P = 0.0699)
46	2-Me-C26 (46)	2-methyl	-16.3 (P = 0.0912)	23.4 (P = 0.004)	28.5 (P = 0.0051)	8.44 (P = 0.2016)	122.5 (P = 0.0011)	6.98 (P = 0.2507)	52.4 (P = 0.009)	20 (P = 0.0428)	28.5 (P = 0.0654)	-19.5 (P = 0.0201)	246.1 (P = 0.0016)	11.8 (P = 0.1113)	32.8 (P = 0.0016)	13.8 (P = 0.2225)	7.62 (P = 0.1739)	22 (P = 0.0584)	-3.93 (P = 0.6935)	-20 (P = 0.0204)	-43.4 (P = 0.0186)	-24.3 (P = 0.0435)	-19.3 (P = 0.0416)	37.4 (P = 0.0445)	-2.87 (P = 0.8137)	-50.4 (P = 0.019)
47	9-C27:1 (47)	monoene	0.37 (P = 0.0714)	2.27 (P = 0.0054)	0.028 (P = 0.8712)	-0.52 (P = 0.0407)	3.1 (P = 0.0079)	0.451 (P = 0.1325)	0.04 (P = 0.768)	0.27 (P = 0.0946)	1.97 (P = 0.0029)	0.55 (P = 0.0175)	4.44 (P = 0.0084)	-0.1 (P = 0.4736)	1.22 (P = 0.0035)	1.59 (P = 0.007)	0.04 (P = 0.7899)	1.55 (P = 0.0047)	0.349 (P = 0.0829)	0.37 (P = 0.2588)	-0.001514 (P = 0.9891)	-0.573 (P = 0.0018)	0.809 (P = 0.0337)	-0.82 (P = 0.0105)	0.677 (P = 0.0434)	0.158 (P = 0.6043)
48	7-C27:1 (48)	monoene	1.84 (P = 0.0034)	27.6 (P = 0.0012)	0.53 (P = 0.2367)	-1.63 (P = 0.0021)	5.8 (P = 0.0054)	1.21 (P = 0.0414)	-0.086 (P = 0.797)	0.84 (P = 0.0579)	3.15 (P = 0.0038)	-0.52 (P = 0.2209)	14.9 (P = 0.007)	-0.18 (P = 0.6173)	2.5 (P = 0.0102)	3.74 (P = 0.0147)	-0.059 (P = 0.8499)	4.11 (P = 0.0031)	2.2 (P = 0.0076)	1.72 (P = 0.0144)	1.41 (P = 0.1376)	-1.41 (P = 0.0051)	2.27 (P = 0.0282)	-2.08 (P = 0.0025)	2.45 (P = 0.0421)	-1.07 (P = 0.2078)
50	n-C27 (50)	n-alkane	10.9 (P = 0.0125)	3.3 (P = 0.121)	1.99 (P = 0.3221)	-13 (P = 0.0001)	15.8 (P = 0.0231)	8.7 (P = 0.0037)	-5.95 (P = 0.0265)	3.68 (P = 0.216)	6.43 (P = 0.048)	-17 (P = 0.0006)	53.5 (P = 0.0042)	-3.58 (P = 0.2407)	-2.49 (P = 0.2365)	1.27 (P = 0.5602)	-3.23 (P = 0.1399)	1.22 (P = 0.6182)	7.35 (P = 0.0213)	0.68 (P = 0.2962)	-1.99 (P = 0.5184)	-5.87 (P = 0.0384)	6.76 (P = 0.0145)	-13.5 (P = <.0001)	2.23 (P = 0.4298)	10.8 (P = 0.0031)
52	2-Me-C27 (52)	2-methyl	0.04 (P = 0.8342)	1.68 (P = 0.0001)	0.645 (P = 0.0031)	2.63 (P = 0.0002)	3.7 (P = 0.0014)	0.467 (P = 0.0313)	0.78 (P = 0.0373)	0.59 (P = 0.0272)	0.356 (P = 0.0632)	-1.82 (P = <.0001)	8.24 (P = 0.0007)	0.114 (P = 0.3632)	0.779 (P = 0.0009)	0.639 (P = 0.0478)	0.52 (P = 0.0044)	0.413 (P = 0.069)	-0.03 (P = 0.8342)	0.44 (P = 0.315)	-0.221 (P = 0.6593)	-0.077 (P = 0.8506)	0.26 (P = 0.5423)	1.01 (P = 0.0775)	0.842 (P = 0.1122)	1 (P = 0.0183)
54	NI (54)	NI	0.07 (P = 0.8864)	-0.00448 (P = 0.9941)	0.085 (P = 0.7362)	-1.27 (P = 0.0067)	3.11 (P = 0.0058)	0.354 (P = 0.3565)	0.75 (P = 0.2473)	0.11 (P = 0.6969)	0.318 (P = 0.0152)	-0.42 (P = 0.0045)	6.38 (P = 0.002)	-0.13 (P = 0.3026)	0.784 (P = 0.0002)	0.564 (P = 0.0399)	0.31 (P = 0.0058)	1.14 (P = 0.0015)	0.118 (P = 0.1276)	1.31 (P = 0.0004)	1.3 (P = 0.028)	0.83 (P = 0.0046)	2.12 (P = 0.002)	0.714 (P = 0.01)	1.45 (P = 0.0108)	-0.89 (P = 0.2185)
55	n-C28 (55)	n-alkane	1.31 (P = 0.008)	1.75 (P = 0.0068)	0.124 (P = 0.5429)	0.512 (P = 0.0806)	0.895 (P = 0.0797)	0.919 (P = 0.0026)	-0.23 (P = 0.3927)	0.71 (P = 0.038)	0.881 (P = 0.0303)	-1.68 (P = 0.0012)	4.72 (P = 0.0036)	-0.87 (P = 0.0268)	0.042 (P = 0.9519)	-0.08 (P = 0.7426)	-0.832 (P = 0.0151)	-0.31 (P = 0.2511)	1.03 (P = 0.0114)	-0.913 (P = 0.001)	-1.87 (P = 0.0011)	-1.85 (P = 0.0003)	-1.03 (P = 0.002)	-2.77 (P = <.0001)	-0.48 (P = 0.2014)	0.598 (P = 0.0174)
57	2-Me-C28 (57)	2-methyl	10.5 (P = 0.158)	64 (P = 0.0002)	25.6 (P = 0.0035)	37.2 (P = 0.0012)	95.6 (P = 0.0023)	22.9 (P = 0.01)	11 (P = 0.2183)	24.1 (P = 0.0195)	14.6 (P = 0.0192)	-70.2 (P = <.0001)	237.2 (P = 0.0002)	-1.99 (P = 0.6422)	15.2 (P = 0.0095)	16.5 (P = 0.0631)	14.1 (P = 0.0122)	14.3 (P = 0.0687)	10.2 (P = 0.0613)	7.11 (P = 0.0711)	-14.1 (P = 0.2361)	-11.5 (P = 0.0002)	13.3 (P = 0.0081)	1.34 (P = 0.784)	18.6 (P = 0.0163)	51.2 (P = 0.0041)
59	7-C29:1 (59)	monoene	0.57 (P = 0.0061)	2.17 (P = 0.0014)	0.084 (P = 0.6277)	-0.28 (P = 0.0246)	5.52 (P = 0.0014)	0.244 (P = 0.033)	-0.352 (P = 0.0328)	-0.016 (P = 0.9027)	0.746 (P = 0.0097)	1.28 (P = 0.0055)	12.2 (P = 0.0021)	0.0000808 (P = 0.9996)	1.96 (P = 0.0014)	1.78 (P = 0.0061)	0.42 (P = 0.0399)	2.14 (P = 0.001)	1.62 (P = 0.0055)	1.55 (P = 0.0056)	2.7 (P = 0.004)	1.49 (P = 0.0006)	2.83 (P = 0.001)	0.329 (P = 0.0582)	1.76 (P = 0.0343)	1.35 (P = 0.0107)
60	n-C29 (60)	n-alkane	7.09 (P = 0.0045)	4.94 (P = 0.0136)	0.765 (P = 0.4373)	-1.02 (P = 0.1289)	4.74 (P = 0.034)	3.94 (P = 0.0024)	-2.72 (P = 0.0104)	2.11 (P = 0.1299)	3.34 (P = 0.0572)	-5.56 (P = 0.002)	34.9 (P = 0.0007)	-2.37 (P = 0.0869)	-1.59 (P = 0.1697)	0.983 (P = 0.2931)	-0.93 (P = 0.2939)	0.012 (P = 0.9897)	5.05 (P = 0.0091)	-0.303 (P = 0.3531)	-2.04 (P = 0.0274)	-2.11 (P = 0.0515)	1.58 (P = 0.0205)	-4.8 (P = <.0001)	0.382 (P = 0.7472)	4.7 (P = 0.0012)
61	2-Me-C29 (61)	2-methyl	1.17 (P = 0.0194)	1.92 (P = 0.0049)	0.314 (P = 0.2069)	-1.43 (P = 0.0001)	2.76 (P = 0.0047)	0.83 (P = 0.0056)	-0.44 (P = 0.3261)	0.44 (P = 0.21)	0.5 (P = 0.0889)	-1.68 (P = 0.0001)	7.9 (P = 0.0112)	-0.47 (P = 0.076)	0.568 (P = 0.0278)	0.815 (P = 0.0337)	0.3 (P = 0.0841)	1.02 (P = 0.0062)	0.617 (P = 0.0204)	2.08 (P = 0.0003)	1.34 (P = 0.038)	0.57 (P = 0.0896)	2.85 (P = 0.0007)	-0.04 (P = 0.8405)	1.89 (P = 0.0318)	0.414 (P = 0.0011)
62	2-Me-C30 (62)	2-methyl	6.26 (P = 0.0033)	9.73 (P = 0.0013)	3.36 (P = 0.0099)	12.3 (P = 0.0002)	10.7 (P = 0.0036)	4.49 (P = 0.0017)	-1.41 (P = 0.1366)	3.36 (P = 0.0333)	1.87 (P = 0.1362)	-5.62 (P = 0.0017)	40.1 (P = 0.0003)	-1.49 (P = 0.1716)	-0.43 (P = 0.5282)	0.875 (P = 0.276)	1.1 (P = 0.1556)	1.2 (P = 0.2228)	7.96 (P = 0.0009)	-0.988 (P = 0.2016)	-1.42 (P = 0.5586)	-0.938 (P = 0.314)	1.93 (P = 0.0406)	-2 (P = 0.067)	1.88 (P = 0.1836)	13.6 (P = 0.0049)
64	n-C31 (64)	n-alkane	0.59 (P = 0.0087)	0.641 (P = 0.0142)	0.297 (P = 0.0873)	0.536 (P = 0.0104)	0.805 (P = 0.0102)	0.662 (P = 0.056)	-0.101 (P = 0.4214)	0.36 (P = 0.0647)	-0.00778 (P = 0.9638)	-0.09 (P = 0.5721)	7.11 (P = 0.0003)	-0.34 (P = 0.0756)	0.321 (P = 0.5872)	0.065 (P = 0.6659)	-0.087 (P = 0.4985)	0.146 (P = 0.3861)	1.61 (P = 0.0066)	-0.112 (P = 0.479)	0.36 (P = 0.2168)	0.01 (P = 0.9371)	0.344 (P = 0.0861)	-0.12 (P = 0.4857)	0.321 (P = 0.1894)	1.59 (P = 0.0007)
ng/fly	Total CHCs (ng/fly)	Total CHCs (ng/fly)	218 (P = 0.0287)	286.5 (P = 0.0531)	418.7 (P = 0.0074)	-377.1 (P = 0.0038)	2060.7 (P = 0.0039)	309.1 (P = 0.0175)	268.3 (P = 0.0727)	321.6 (P = 0.0088)	587.5 (P = 0.0353)	417.1 (P = 0.0158)	4048.5 (P = 0.0007)	260.9 (P = 0.051)	915.9 (P = 0.0005)	839.7 (P = 0.0187)	386.2 (P = 0.0122)	982.6 (P = 0.0139)	317.7 (P = 0.0511)	508.9 (P = 0.0219)	723.7 (P = 0.0562)	310.4 (P = 0.0453)	1434.5 (P = 0.0041)	524.9 (P = 0.0615)	825.6 (P = 0.0188)	-406.8 (P = 0.039)

## Sheet: C
Driver	UAS-RNAi	CG Number	Transformant ID	Sex	Sample	n-C21 (1)	n-C22 (4)	7,11-C23:2 (5)	2-Me-C22 (6)	9-C23:1 (8)	7-C23:1 (9)	6-C23:1 (10)	5-C23:1 (11)	x-C23:1 (12)	n-C23 (13)	11-/ 9-Me-C23 (14)	7,11-C24:2 (15)	x,y-C24:2 (16)	3-Me-C23/ 9-C24:1 (17)	6-C24:1 (19)	NI (20)	5-C24:1 (21)	n-C24 (22)	9,13-C25:2 (23)	7,11-C25:2 (24)	2-Me-C24 (25)	6,10-C25:2 (26)	9-C25:1/ 5,9-C25:2 (27)	8-C25:1 (28)	7-C25:1 (29)	5-C25:1 (31)	n-C25 (32)	NI (33)	NI (34)	13-/11-Me-C25 (35)	5-Me-C25 (36)	8,12-C26:2 (37)	7,11-C26:2 (38)	2-Me-C25 (39)	6,10-C26:2 (40)	3-Me-C25/ 9-C26:1 (41)	7-C26:1 (42)	n-C26 (44)	9,13-C27:2 (45)	7,11-C27:2/ 2-Me-C26 (46)	5,9-C27:2/ 9-C27:1 (47)	7-C27:1 (48)	5-C27:1 (49)	n-C27 (50)
PromE(800)-GAL4	app	CG42318	106488/KK	F	1	0.0107246	0.0228491	0.00964263	0.007334	0.00811456	0.0250559	0.00885622	0.00298011	0.0020963	0.192748	0.00157739	0.00159128	0.001217	0.0030481	0.00471557	0.00208987	0.00218615	0.0282619	0.0100087	0.0449583	0.0290376	0.00944608	0.0890036	0.0047886	0.0341605	0.00452168	0.10196	0.00051536	0.000178826	0.000835705	0.000950255	0.00275257	0.00788999	0.00230388	0.00728713	0.0035531	0.00268692	0.0123278	0.00858004	0.53152	0.0381992	0.0232269	0.00208608	0.063566
PromE(800)-GAL4	app	CG42318	106488/KK	F	2	0.00974683	0.02332	0.00739758	0.0061737	0.00614751	0.0177462	0.00700268	0.00243349	0.00209695	0.206805	0.000357242	0.00127887	0.00108005	0.00225509	0.00347033	0.00169623	0.00143349	0.0312066	0.00876483	0.0323736	0.0340587	0.00656523	0.0649987	0.00527563	0.0242385	0.00342104	0.11836	0.000471828	0	0.000721086	0.000841284	0.00195799	0.00544691	0.00318755	0.00468734	0.00339929	0.00217359	0.0139796	0.00653276	0.433202	0.0232801	0.0146617	0.00184207	0.0710032
PromE(800)-GAL4	app	CG42318	106488/KK	F	3	0.0110622	0.0225605	0.00659961	0.00632978	0.00489435	0.0170163	0.00666477	0.00214298	0.00217153	0.23836	0.00130223	0.000973406	0.000533199	0.00188707	0.0029918	0.00117265	0.00121709	0.0294122	0.0072088	0.0303232	0.0427908	0.00527386	0.056841	0.00558592	0.0232861	0.003941	0.133519	0.000440831	0	0.000659211	0.00072633	0.00144683	0.00512964	0.00327408	0.00364896	0.00314348	0.00176659	0.0124965	0.00515132	0.437049	0.0259712	0.0180713	0.00232834	0.0733912
PromE(800)-GAL4	app	CG42318	106488/KK	F	4	0.00858726	0.0198464	0.00549469	0.00584171	0.00472289	0.0144072	0.00590477	0.00167911	0.00185018	0.210715	0.00117584	0.00085086	0.000287711	0.00156434	0.00235384	0.00139931	0.0011454	0.0294422	0.00641596	0.0245245	0.0345869	0.00486559	0.0527011	0.00472692	0.0214819	0.00323386	0.133929	0.000433764	0	0.000543883	0.000561581	0.00119974	0.00396475	0.00375673	0.00321236	0.0028058	0.00182307	0.0147149	0.00549298	0.418134	0.0230545	0.0152379	0.00202946	0.0789336
PromE(800)-GAL4	app	CG42318	106488/KK	F	5	0.0083373	0.0191575	0.00626933	0.00555036	0.00468357	0.0145937	0.00606025	0.00179263	0.00183776	0.194736	0.00106782	0.000963478	0.000924239	0.00180979	0.00237802	0.0014745	0.00114259	0.0263733	0.00709366	0.0287129	0.0358351	0.00478696	0.0532145	0.00496655	0.0200826	0.00296051	0.113206	0.00039125	0	0.000533245	0.000588076	0.00148161	0.00459266	0.00305421	0.00380163	0.00264915	0.0016408	0.0115834	0.00513439	0.399501	0.0255058	0.0152363	0.00213493	0.0634693
PromE(800)-GAL4	CG13091	CG13091	100943/KK	F	1	0.00729492	0.0132852	0.00767424	0.00720577	0.00633915	0.0188473	0.00606484	0.00188146	0.00127115	0.144126	0.00107353	0.000929022	0.000732737	0.00174073	0.00348236	0.00083443	0.00140245	0.0174242	0.0058798	0.0264026	0.0232739	0.00345176	0.0570998	0.00282045	0.0246629	0.00501231	0.0798145	0.00043515	0	0.000443627	0.000528411	0.00111712	0.00415622	0.00301964	0.00265927	0.00287367	0.00234862	0.00788124	0.00487646	0.412835	0.0406278	0.0291045	0.00242999	0.0471475
PromE(800)-GAL4	CG13091	CG13091	100943/KK	F	2	0.00666059	0.0130545	0.00546013	0.00566107	0.00494744	0.013955	0.0040809	0.00134358	0.001087	0.146216	0.000591624	0.000651591	0.000361626	0.00114507	0.00243756	0.000639962	0.000966298	0.018047	0.0046933	0.0183052	0.030267	0.00287712	0.0407696	0.00227622	0.0188647	0.00334329	0.0856232	0.000352636	0	0.000271323	0.000443009	0.000763566	0.00251007	0.00404881	0.00169593	0.00259622	0.00174667	0.00908961	0.00394174	0.350166	0.0266831	0.0234801	0.0022926	0.0481099
PromE(800)-GAL4	CG13091	CG13091	100943/KK	F	3	0.00794815	0.0178573	0.00626492	0.00497423	0.00517343	0.0137887	0.00464729	0.00140176	0.00134935	0.178001	0.00109083	0.00083392	0.000305201	0.00131544	0.00261856	0.000859668	0.00107913	0.023612	0.00511661	0.020468	0.0207199	0.0025302	0.0408984	0.00273543	0.0172726	0.0034459	0.092386	0.000363747	0	0.000384311	0.000468885	0.000872659	0.00236934	0.00334835	0.00192165	0.0026013	0.00169692	0.0104527	0.00354061	0.319622	0.0282107	0.0211403	0.00284996	0.0597681
PromE(800)-GAL4	CG13091	CG13091	100943/KK	F	4	0.00872839	0.0186689	0.00651847	0.00593071	0.00534874	0.0141656	0.00484152	0.00146513	0.00143154	0.189569	0.00116448	0.000846546	0.000231061	0.00139418	0.00263741	0.000870691	0.0010173	0.0247472	0.00524442	0.0208235	0.0260554	0.00260494	0.0424522	0.00294725	0.0179809	0.00365695	0.103903	0.000385251	0.000176815	0.000465356	0.000501461	0.000840023	0.00264885	0.00384884	0.00187169	0.00289057	0.00176376	0.0118319	0.00375949	0.353877	0.030942	0.023665	0.00310948	0.0668344
PromE(800)-GAL4	CG13091	CG13091	100943/KK	F	5	0.00848411	0.020117	0.00664197	0.00539144	0.00539461	0.0144179	0.00487071	0.00150713	0.00148963	0.195534	0.00115198	0.000961872	0.00027485	0.00146547	0.00281744	0.000935807	0.00111282	0.0260578	0.00548235	0.021861	0.0224623	0.00260983	0.0426742	0.00290512	0.018028	0.00378716	0.0990228	0.000401936	0	0.00043736	0.000477288	0.000895659	0.00259109	0.00359164	0.00197571	0.00282706	0.00184071	0.0124626	0.00371411	0.336897	0.0365228	0.0277044	0.00392722	0.0703643
PromE(800)-GAL4	CG16979	CG16979	105386/KK	F	1	0.0106396	0.0202556	0.0106722	0.00782919	0.00863226	0.0258294	0.00863882	0.0032411	0.00185515	0.179788	0.00154934	0.00149493	0.00111611	0.00278628	0.00483965	0.00141171	0.0021611	0.0234281	0.00868764	0.044021	0.026488	0.00644268	0.0872834	0.00450883	0.0365277	0.00538579	0.0955171	0.000504671	0.000220841	0.000799907	0.000848903	0.00229071	0.00808509	0.00175687	0.00633374	0.00367663	0.00279758	0.0104658	0.00773842	0.556614	0.0419261	0.0250492	0.00219627	0.0577912
PromE(800)-GAL4	CG16979	CG16979	105386/KK	F	2	0.00984918	0.0210076	0.0078586	0.00517563	0.00633146	0.0169938	0.00562786	0.00218443	0.00169574	0.197748	0.000761946	0.00107308	0.000453479	0.00163435	0.00299847	0.00106219	0.00140537	0.0263979	0.0062944	0.0273246	0.0220271	0.00388566	0.0539471	0.00343244	0.02316	0.00396862	0.106438	0.000365083	0	0.000484786	0.000499338	0.00125083	0.00424258	0.0019633	0.00327677	0.0025654	0.00169645	0.0125899	0.00464623	0.336754	0.0320351	0.0204932	0.00297535	0.0697071
PromE(800)-GAL4	CG16979	CG16979	105386/KK	F	3	0.00871612	0.0186687	0.00627094	0.00459136	0.00510746	0.0142955	0.0048249	0.00181732	0.00139722	0.175264	0.000665651	0.00091939	0.000355186	0.00142272	0.00257856	0.000955919	0.00117144	0.0238715	0.00502546	0.0221395	0.0201255	0.00305721	0.0463306	0.00284971	0.0200873	0.00239528	0.0972725	0.000340517	0	0.000440567	0.000516147	0.00112935	0.00355916	0.00194889	0.00284429	0.00239995	0.00172114	0.0115384	0.00398111	0.298746	0.0297106	0.0200272	0.00289438	0.0634788
PromE(800)-GAL4	CG16979	CG16979	105386/KK	F	4	0.00919909	0.0214003	0.00600974	0.00406487	0.0051493	0.0139604	0.004851	0.0018288	0.00158896	0.196892	0.00093919	0.000954272	0.000325752	0.00146358	0.00247639	0.00114918	0.00117017	0.0274753	0.00545561	0.0246024	0.0200977	0.0033449	0.0473015	0.00315635	0.0200013	0.003346	0.105653	0.000297866	0	0.000452675	0.000482717	0.00124634	0.00385902	0.0019431	0.00312369	0.00246122	0.0016657	0.0133703	0.00406602	0.317205	0.027886	0.0178476	0.00279208	0.0723194
PromE(800)-GAL4	CG16979	CG16979	105386/KK	F	5	0.00709909	0.0151418	0.00567434	0.00730911	0.00448786	0.0128263	0.00434687	0.00160179	0.00135491	0.162133	0.000725485	0.00072848	0.000408255	0.00115761	0.00215378	0.000599575	0.00113541	0.0214951	0.00483694	0.0227309	0.0476391	0.00265323	0.0426626	0.00317783	0.0185878	0.00303445	0.101568	0.000394262	0	0.000331987	0.000374531	0.000916114	0.00329496	0.00425779	0.0027425	0.00216045	0.00107518	0.00882892	0.00384874	0.392672	0.0186773	0.0127629	0.0014802	0.0450339
PromE(800)-GAL4	CG30008	CG30008	102817/KK	F	1	0.0106778	0.0200043	0.0148497	0.00706972	0.00704194	0.0258449	0.00821113	0.00217347	0.00116774	0.129168	0.00140672	0.00289142	0.000825677	0.00300421	0.00333958	0.00220096	0.00101156	0.0206063	0.0108625	0.0584388	0.0226742	0.00643806	0.0858514	0.010351	0.0191996	0.00165741	0.0581172	0.000455922	0	0.000781291	0.000945822	0.00362235	0.00876021	0.00162352	0.00768354	0.00344282	0.00250459	0.010087	0.00777207	0.510823	0.027764	0.00715045	0.000635219	0.0553127
PromE(800)-GAL4	CG30008	CG30008	102817/KK	F	2	0.00878574	0.0183517	0.00953937	0.00497045	0.00474416	0.0155356	0.00516052	0.00134614	0.00112384	0.126362	0.000733297	0.0015649	0.000857847	0.00204698	0.00198886	0.00162133	0.000643709	0.0205277	0.00745618	0.0330121	0.022657	0.00394413	0.0492971	0.00768215	0.0116816	0.00114853	0.0601969	0.000346508	0	0.000584234	0.000616253	0.0019644	0.00517986	0.00169684	0.00404205	0.00256175	0.00205165	0.00955735	0.00536805	0.327963	0.0212044	0.00714878	0.000992917	0.0493971
PromE(800)-GAL4	CG30008	CG30008	102817/KK	F	3	0.00980942	0.021713	0.00917924	0.00392355	0.00478941	0.0164648	0.00535259	0.00139166	0.00125096	0.154165	0.000740616	0.00156102	0.000350351	0.00180918	0.00222686	0.00164229	0.000658948	0.0262829	0.00780247	0.0314269	0.0176052	0.00464889	0.0518841	0.00882734	0.0130169	0.00127515	0.0796372	0.000344511	0	0.000618739	0.000638139	0.00203024	0.00557935	0.00139942	0.00396186	0.00262354	0.0026724	0.0161344	0.00589714	0.335742	0.0281337	0.00991639	0.00161503	0.0874966
PromE(800)-GAL4	CG30008	CG30008	102817/KK	F	4	0.00674723	0.0145859	0.00703112	0.00420248	0.00303411	0.0120727	0.00419867	0.00108716	0.00101006	0.113489	0.000847228	0.00112712	0.00030782	0.00145976	0.00145232	0.00130995	0.000499436	0.018985	0.00594606	0.0260799	0.0237337	0.00320305	0.0412484	0.00665148	0.00988148	0.00105344	0.0628573	0.000423284	0	0.000521133	0.000472998	0.00148362	0.00411456	0.00214002	0.003189	0.00236934	0.00149385	0.00916194	0.00448776	0.307261	0.0198113	0.00672859	0.00103185	0.0487972
PromE(800)-GAL4	CG30008	CG30008	102817/KK	F	5	0.00710243	0.0168173	0.00754174	0.00503501	0.00328121	0.0127782	0.00456374	0.00111507	0.00115005	0.127585	0.00082554	0.00126404	0.000382798	0.00161329	0.00183556	0.00138073	0.00057319	0.0223071	0.00682857	0.0283134	0.0252534	0.00360846	0.0444477	0.00777217	0.010075	0.00104767	0.0702028	0.000352453	0	0.00057983	0.000531916	0.00182668	0.00474209	0.00232013	0.00382231	0.00252413	0.00191904	0.0118007	0.00480396	0.333409	0.0208856	0.00668804	0.00082235	0.0587349
PromE(800)-GAL4	CG8680	CG8680	102017/KK	F	1	0.0226532	0.0471036	0.0181602	0.0218482	0.0252311	0.0912974	0.0234379	0.0116533	0.00331992	0.546735	0.00442016	0.00351281	0.00219869	0.00900035	0.0181229	0.00573466	0.00712559	0.0769546	0.0233955	0.127826	0.0880576	0.0351236	0.402452	0.00985911	0.18988	0.0230662	0.398179	0.00187847	0.000920247	0.00206888	0.00300608	0.00729407	0.0276763	0.00761594	0.0193307	0.012423	0.0120134	0.0558674	0.0260162	1.84869	0.162925	0.143223	0.0104216	0.352942
PromE(800)-GAL4	CG8680	CG8680	102017/KK	F	2	0.0240412	0.0515758	0.0164321	0.0217959	0.0180205	0.0518488	0.0191588	0.00748022	0.00481234	0.62563	0.00358874	0.00224613	0.00307105	0.00624591	0.0103054	0.00404918	0.00473303	0.0842496	0.0196524	0.0889356	0.105356	0.0203902	0.216939	0.011615	0.100708	0.0153173	0.432505	0.00142512	0.000719103	0.00196525	0.00261718	0.00494763	0.0172834	0.0129038	0.0142856	0.0107774	0.00784568	0.0561688	0.0163999	1.46981	0.093643	0.0803354	0.0099594	0.344853
PromE(800)-GAL4	CG8680	CG8680	102017/KK	F	3	0.0216763	0.0420686	0.0160729	0.0196433	0.0186006	0.0543028	0.0179573	0.00731775	0.00438282	0.56939	0.00248821	0.00196429	0.00299147	0.00575564	0.00922602	0.0039711	0.00409331	0.0684959	0.0196308	0.0954023	0.112999	0.0208011	0.228144	0.0106077	0.106726	0.0137616	0.386414	0.00124695	0.000428947	0.0013162	0.00174076	0.00445594	0.0189434	0.0105672	0.0117152	0.00853529	0.00624008	0.04242	0.0171071	1.46121	0.112493	0.0894706	0.00919941	0.291885
PromE(800)-GAL4	CG8680	CG8680	102017/KK	F	4	0.0204984	0.0418174	0.0122375	0.017179	0.0134917	0.0409205	0.0151274	0.00595123	0.00419475	0.560469	0.00217126	0.00159324	0.0025329	0.00459076	0.00718793	0.00301254	0.00320863	0.0696216	0.0147157	0.0732242	0.1018	0.0154468	0.165538	0.0110045	0.0774552	0.0113331	0.398481	0.0010055	0.000407998	0.00122019	0.00165178	0.00346281	0.0136436	0.00971886	0.00954143	0.00731783	0.00492273	0.0444843	0.0142472	1.19116	0.0607684	0.0543161	0.00697346	0.292999
PromE(800)-GAL4	Desi	CG14686	105692/KK	F	1	0.0104867	0.018583	0.0103714	0.00849913	0.00873041	0.0266992	0.00894089	0.00344065	0.00185823	0.186101	0.00145573	0.00142878	0.00124148	0.00280144	0.00524259	0.00133892	0.00225981	0.0220918	0.00827723	0.0466961	0.0332207	0.0061538	0.0891827	0.00451428	0.0386872	0.00537089	0.0987596	0.000523574	0.000173521	0.000698932	0.000722761	0.0023223	0.00783004	0.00227927	0.00576046	0.00340187	0.00254744	0.00918491	0.00705561	0.567328	0.040079	0.0243603	0.00227601	0.0584927
PromE(800)-GAL4	Desi	CG14686	105692/KK	F	2	0.0101366	0.019615	0.00755199	0.00646573	0.00613683	0.0177059	0.00612482	0.00240007	0.00168311	0.199339	0.000699164	0.00105861	0.00055297	0.00171164	0.00323972	0.00108972	0.00146496	0.0244957	0.00609532	0.0300772	0.0335099	0.00388823	0.0553065	0.00360463	0.0248818	0.00400313	0.107578	0.000370527	0	0.000459021	0.000507932	0.00144206	0.00469369	0.00289858	0.00347847	0.00266405	0.00166714	0.0105439	0.00470773	0.397402	0.0248353	0.0162211	0.00207979	0.0633428
PromE(800)-GAL4	Desi	CG14686	105692/KK	F	3	0.0108211	0.0204833	0.0072441	0.00536079	0.00594941	0.017206	0.00583337	0.00229348	0.00167366	0.214566	0.000773171	0.000940096	0.000796462	0.00182674	0.00294302	0.0011549	0.00140989	0.0251717	0.00563285	0.028323	0.0254022	0.00379606	0.051356	0.00355612	0.0235539	0.00380439	0.111404	0.000308441	0	0.000461183	0.000554408	0.00127344	0.00430522	0.00244878	0.0031565	0.00252766	0.00151248	0.0116694	0.00376214	0.343599	0.0256994	0.0177465	0.00245701	0.0739906
PromE(800)-GAL4	Desi	CG14686	105692/KK	F	4	0.00793401	0.0163958	0.00506995	0.00345522	0.00428061	0.0126882	0.00425809	0.00166929	0.00129364	0.178913	0.000819921	0.000730101	0.000271656	0.00128585	0.00238012	0.000777711	0.00109946	0.0220373	0.00446861	0.0225226	0.0186083	0.00302307	0.0415697	0.00276894	0.0189481	0.00301012	0.0983222	0.000271212	0	0.00038545	0.000327531	0.00099311	0.0032781	0.00202577	0.00255071	0.00196012	0.00126547	0.0109015	0.00334843	0.293552	0.0220718	0.0150683	0.00230964	0.069634
PromE(800)-GAL4	Desi	CG14686	105692/KK	F	5	0.0080582	0.0169882	0.00506179	0.00386278	0.00434421	0.0127272	0.00441047	0.00166176	0.00140316	0.18624	0.000791893	0.000716939	0.000284547	0.00124155	0.00230139	0.000867153	0.0010541	0.0232504	0.0044643	0.0220759	0.0212544	0.00300456	0.041231	0.00297441	0.0189991	0.00299097	0.10532	0.000294456	0	0.000386042	0.00031565	0.000980051	0.00317815	0.00234264	0.00246362	0.00201512	0.00124517	0.011239	0.00339207	0.307894	0.0221825	0.0151753	0.00233478	0.0687509
PromE(800)-GAL4	KK Control	Control	60100/KK	F	1	0.00935589	0.0186404	0.00721612	0.00602304	0.00672656	0.0177701	0.00563057	0.00228	0.00159101	0.178617	0.000724972	0.00110731	0.0009165	0.00194321	0.00343596	0.00133624	0.00161698	0.0231263	0.00606319	0.0274494	0.0271138	0.00415962	0.0559949	0.00296551	0.0248571	0.00257095	0.0959308	0.000374894	0	0.000491853	0.000592553	0.00150923	0.00451387	0.00229395	0.00356572	0.00286116	0.00202199	0.0106764	0.00472259	0.349697	0.0315416	0.0221481	0.00302656	0.0610568
PromE(800)-GAL4	KK Control	Control	60100/KK	F	2	0.0118791	0.0234165	0.00793279	0.00534667	0.00752392	0.0203799	0.00637595	0.00268817	0.00185339	0.228065	0.000297745	0.00118933	0.000838032	0.00214305	0.00420443	0.00124169	0.0017829	0.0282641	0.00673942	0.0319923	0.0218228	0.00525459	0.0642283	0.00357038	0.0294882	0.00464375	0.116601	0.00029856	0	0.000484543	0.000578781	0.00169076	0.00482734	0.00225555	0.00392884	0.00282977	0.00213531	0.0144113	0.0046205	0.359177	0.0267509	0.0193636	0.00257122	0.0859421
PromE(800)-GAL4	KK Control	Control	60100/KK	F	3	0.00875933	0.0177667	0.00659772	0.00489062	0.0063046	0.0160883	0.00510763	0.00218865	0.0015325	0.175084	0.000611157	0.000981133	0.000784655	0.00171601	0.00333015	0.00105102	0.00148845	0.0219723	0.00579192	0.0266519	0.0226304	0.00395844	0.0529207	0.00292865	0.0235504	0.00387116	0.092313	0.000283748	0	0.000348216	0.000435314	0.00142253	0.00399625	0.00218421	0.00327614	0.00231492	0.0018383	0.0105142	0.00419446	0.322389	0.0285166	0.0190981	0.0028985	0.064625
PromE(800)-GAL4	KK Control	Control	60100/KK	F	4	0.00761745	0.0161941	0.00540951	0.00403778	0.00498305	0.013236	0.00451573	0.00184684	0.00140628	0.168834	0.000517536	0.000823164	0.000285456	0.00136269	0.00268609	0.000786571	0.00115929	0.0220696	0.00484294	0.0231237	0.0218794	0.00311077	0.0458199	0.00286715	0.0202173	0.0031524	0.096508	0.00028925	0	0.000378063	0.000445092	0.00121675	0.00362896	0.00215826	0.00283479	0.00223468	0.00152374	0.0108578	0.0037587	0.30655	0.0240782	0.0161965	0.00243582	0.0630506
PromE(800)-GAL4	KK Control	Control	60100/KK	F	5	0.00786421	0.0172494	0.00552641	0.00461667	0.00493329	0.0137711	0.00505054	0.00186568	0.00155459	0.181435	0.000951415	0.000867506	0.000700211	0.00163043	0.00261613	0.00121384	0.00119854	0.025062	0.00524177	0.0234282	0.0262951	0.00342483	0.0487835	0.00341403	0.0214087	0.00346697	0.111458	0.000396451	0	0.000427029	0.000475924	0.00120129	0.00371059	0.00277548	0.00296315	0.0025516	0.00184871	0.0135641	0.00438031	0.346388	0.0287931	0.0192022	0.00286769	0.0703757
PromE(800)-GAL4	Lip2	CG17116	102033/KK	F	1	0.0111527	0.0211499	0.00881162	0.00451874	0.00860324	0.0283765	0.00889769	0.00381173	0.00195958	0.220778	0.00159348	0.00125915	0.000526187	0.00260558	0.00531607	0.00158502	0.0022722	0.0269689	0.00775996	0.0443658	0.0156081	0.00701493	0.096009	0.00471905	0.0445149	0.00683076	0.120395	0.000562038	0.00023726	0.000743158	0.00084419	0.00225054	0.00704803	0.00172374	0.00547772	0.00342122	0.0027084	0.0130594	0.00725511	0.503751	0.0475527	0.0350248	0.00296071	0.0809597
PromE(800)-GAL4	Lip2	CG17116	102033/KK	F	2	0.0128887	0.0258797	0.00844163	0.00646414	0.00689538	0.0218716	0.00716301	0.0026937	0.00197162	0.262973	0.00103458	0.00112937	0.000518931	0.00221541	0.00415227	0.00122931	0.00180011	0.0332339	0.0068264	0.0342984	0.0311341	0.00461213	0.0685937	0.00427271	0.0311808	0.0058143	0.141229	0.000509924	0.000191697	0.000681556	0.000778026	0.00165659	0.00549895	0.0027536	0.00437032	0.00353439	0.00200172	0.0140835	0.00531144	0.43562	0.0273344	0.0216089	0.00204745	0.0772161
PromE(800)-GAL4	Lip2	CG17116	102033/KK	F	3	0.0100052	0.0221763	0.00681666	0.00453989	0.00540736	0.0166708	0.00544785	0.0022804	0.00162328	0.215838	0.00128175	0.00100622	0.000423739	0.00177494	0.00322525	0.00108455	0.00153791	0.0287835	0.00530245	0.028712	0.0229455	0.00325459	0.053327	0.00333896	0.022907	0.00282635	0.112812	0.000346127	0	0.000560403	0.000574055	0.00143016	0.00442422	0.00211948	0.00381085	0.00279119	0.00151066	0.0128751	0.00391351	0.34817	0.0239425	0.0172142	0.00208879	0.0706314
PromE(800)-GAL4	Lip2	CG17116	102033/KK	F	4	0.0102844	0.024091	0.00681241	0.00442968	0.0053457	0.017566	0.00556445	0.00221866	0.00166853	0.234324	0.00123982	0.00105573	0.000434151	0.00182767	0.00337867	0.00124291	0.00160093	0.0322353	0.00584067	0.0310162	0.0270751	0.00390574	0.0571147	0.00370485	0.0253419	0.00426422	0.127326	0.000395805	0	0.000556637	0.000582368	0.00154399	0.00446927	0.00260121	0.00405579	0.0029399	0.00163706	0.013738	0.00433344	0.377275	0.0250583	0.0184813	0.00208288	0.071479
PromE(800)-GAL4	Lip2	CG17116	102033/KK	F	5	0.0116719	0.0268104	0.00700954	0.00492026	0.00604853	0.018841	0.00627706	0.00256804	0.00200884	0.269519	0.00139817	0.00100997	0.000359161	0.00209213	0.00375446	0.00126287	0.00163064	0.0361606	0.00600153	0.0311608	0.0256919	0.00425612	0.0619808	0.00414787	0.0282249	0.00521238	0.142936	0.000400969	0.000179949	0.000664646	0.00072223	0.00154863	0.00517303	0.00233344	0.00404831	0.00324221	0.00186302	0.0165614	0.00418875	0.391894	0.0275693	0.0223858	0.0027911	0.092821
PromE(800)-GAL4	PHGPx	CG12013	100790/KK	F	1	0.00827822	0.0165983	0.00984772	0.00449197	0.00791162	0.0243838	0.00757813	0.00326146	0.00147209	0.149312	0.00118337	0.00151847	0.000984963	0.00243983	0.00388571	0.00162369	0.00179661	0.0178722	0.00985508	0.0513455	0.0193065	0.00534404	0.0814694	0.00456671	0.0306246	0.00375841	0.0703474	0.000363078	0	0.000491271	0.000648851	0.00260339	0.00790389	0	0.00601071	0.00235901	0.00187007	0.00930736	0.00747441	0.459927	0.0302774	0.0175216	0.00172918	0.0564885
PromE(800)-GAL4	PHGPx	CG12013	100790/KK	F	2	0.00972978	0.0207307	0.0079064	0.00384781	0.00684349	0.0188021	0.00557654	0.00261785	0.0015695	0.190446	0.000654041	0.00115506	0.000840119	0.00191415	0.00314559	0.00117403	0.00139851	0.0211691	0.00779111	0.0391594	0.0217095	0.00388109	0.0579093	0.00346933	0.0232342	0.00210322	0.0833763	0.000282197	0	0.000461229	0.000557083	0.00182134	0.00486541	0.00160439	0.00384761	0.00210812	0.00141049	0.0101186	0.00505981	0.340605	0.0167741	0.0106049	0.00130162	0.0654814
PromE(800)-GAL4	PHGPx	CG12013	100790/KK	F	3	0.0107527	0.021734	0.0084524	0.00478632	0.00707287	0.019531	0.00618276	0.0025612	0.00179415	0.213913	0.000850272	0.00119839	0.000480889	0.0017418	0.00301381	0.00120642	0.00140572	0.0223672	0.00873101	0.0407681	0.0300597	0.00402593	0.0605841	0.00423348	0.0237571	0.0031684	0.0970379	0.000286778	0	0.000419412	0.000531751	0.00184113	0.00505667	0.00225167	0.00397091	0.00224306	0.00144663	0.00998326	0.0054586	0.391046	0.0220511	0.013537	0.00191717	0.0654709
PromE(800)-GAL4	PHGPx	CG12013	100790/KK	F	4	0.00882708	0.0199215	0.00679891	0.0032358	0.00580195	0.016362	0.0050941	0.00245058	0.00156337	0.205851	0.000737588	0.00101896	0.000318758	0.00145384	0.00264651	0.00102726	0.001168	0.0226371	0.00735343	0.0338367	0.02169	0.00351732	0.0533172	0.00371177	0.0210336	0.00259498	0.0944725	0.000228143	0	0.000340373	0.000364002	0.00156197	0.00451065	0.0015817	0.003327	0.00183039	0.00129537	0.010925	0.00461446	0.338123	0.0204215	0.0125401	0.00185134	0.0745532
PromE(800)-GAL4	PHGPx	CG12013	100790/KK	F	5	0.00741898	0.0194991	0.00663732	0.00638508	0.00576993	0.016406	0.00564909	0.00204522	0.00160354	0.192138	0.00102659	0.00100386	0.000429762	0.00166197	0.00318937	0.00120809	0.0015004	0.0264265	0.00704563	0.030272	0.0403326	0.00425524	0.0583353	0.00409007	0.0247083	0.0035528	0.113877	0	0.000417966	0.000482678	0.000564217	0.00159888	0.00494597	0.00330146	0.00402171	0.00280466	0.00192926	0.0135892	0.00523695	0.434121	0.0307077	0.0202024	0.00282174	0.0738836
[truncated: 14 more columns]

## Sheet: D
Driver	UAS-RNAi	CG Number	Transformant ID	Sex	Sample	n-C21 (1)	n-C22 (4)	7,11-C23:2 (5)	2-Me-C22 (6)	9-C23:1 (8)	7-C23:1 (9)	6-C23:1 (10)	5-C23:1 (11)	x-C23:1 (12)	n-C23 (13)	11-/ 9-Me-C23 (14)	7,11-C24:2 (15)	x,y-C24:2 (16)	3-Me-C23/ 9-C24:1 (17)	6-C24:1 (19)	NI (20)	5-C24:1 (21)	n-C24 (22)	9,13-C25:2 (23)	7,11-C25:2 (24)	2-Me-C24 (25)	6,10-C25:2 (26)	9-C25:1/ 5,9-C25:2 (27)	8-C25:1 (28)	7-C25:1 (29)	5-C25:1 (31)	n-C25 (32)	NI (33)	NI (34)	13-/11-Me-C25 (35)	5-Me-C25 (36)	8,12-C26:2 (37)	7,11-C26:2 (38)	2-Me-C25 (39)	6,10-C26:2 (40)	3-Me-C25/ 9-C26:1 (41)	7-C26:1 (42)	n-C26 (44)	9,13-C27:2 (45)	7,11-C27:2/ 2-Me-C26 (46)	5,9-C27:2/ 9-C27:1 (47)	7-C27:1 (48)	5-C27:1 (49)	n-C27 (50)
PromE(800)-GAL4	Cyp9f2	CG11466	106779/KK	F	1	0.0207697	0.0301467	0.0253556	0.0224254	0.0222592	0.0554187	0.0144644	0.00549089	0.00269599	0.287669	0.00189878	0.00267621	0.00267505	0.0038586	0.0074148	0.00280543	0.00386051	0.0273698	0.0153672	0.0879003	0.0743835	0.0155209	0.131212	0.0085146	0.0649445	0.00503418	0.134084	0.000730071	0	0.000743923	0.000585467	0.00314772	0.0102193	0.00699232	0.00844102	0.00434988	0.00293718	0.0109005	0.0129334	0.812654	0.0699045	0.0587728	0.00682323	0.0856645
PromE(800)-GAL4	Cyp9f2	CG11466	106779/KK	F	2	0.013867	0.0244603	0.0172685	0.0134225	0.0153623	0.0414761	0.0107301	0.00433431	0.00184095	0.226231	0.00165425	0.00208431	0.00139152	0.00312204	0.00593417	0.00235528	0.00312697	0.0265301	0.0112555	0.0662148	0.049596	0.0137437	0.10338	0.0082998	0.0561616	0.00533582	0.1186	0.000644929	0	0.000659677	0.000546962	0.00269644	0.00914953	0.00434949	0.00705052	0.00388709	0.00285564	0.0135326	0.010653	0.653363	0.063222	0.0489907	0.00610169	0.100266
PromE(800)-GAL4	Cyp9f2	CG11466	106779/KK	F	3	0.0148282	0.0225341	0.0179943	0.014123	0.0150745	0.0404518	0.011248	0.00490126	0.00200762	0.229545	0.00145662	0.00178812	0.00178431	0.00310372	0.00509881	0.00214965	0.00277259	0.0226671	0.0105209	0.067732	0.0577437	0.0113316	0.0986973	0.00729869	0.0499436	0.00424048	0.117667	0.000587975	0	0.000555167	0.000405261	0.00228968	0.00852655	0.00449986	0.00609008	0.00326933	0.00201856	0.00990215	0.0102177	0.656671	0.0560712	0.0445396	0.00539716	0.0772138
PromE(800)-GAL4	Cyp9f2	CG11466	106779/KK	F	4	0.0094393	0.016387	0.0149724	0.0100452	0.0113806	0.03159	0.00779283	0.00367676	0.00122784	0.1517	0.00151927	0.0016142	0.00180324	0.00271545	0.00381433	0.00160546	0.00252516	0.0156353	0.00974268	0.0660425	0.0432832	0.0087326	0.0736222	0.00586707	0.0373524	0.00340127	0.0751107	0.000578563	0	0.000655814	0.000600292	0.0021772	0.00742388	0.00315465	0.00632891	0.00288562	0.00158812	0.00771224	0.00786401	0.499947	0.0390305	0.0296395	0.00378711	0.0631052
PromE(800)-GAL4	Cyp9f2	CG11466	106779/KK	F	5	0.0104079	0.0178744	0.0160968	0.0105026	0.0125894	0.0359182	0.00876885	0.00405668	0.001293	0.157503	0.00200068	0.0017268	0.00133229	0.00266443	0.00434799	0.0017377	0.00282011	0.0177205	0.00976213	0.0658778	0.0435629	0.0102637	0.0836296	0.00665329	0.0446869	0.00367981	0.0875474	0.000936926	0.000277063	0.000804299	0.00068832	0.0021285	0.00706902	0.00371444	0.0063525	0.00333491	0.002217	0.0102396	0.00871609	0.545925	0.0540071	0.0448398	0.00509737	0.0769447
PromE(800)-GAL4	CG18609	CG18609	100172/KK	F	1	0.0104433	0.0178036	0.0167603	0.00935651	0.0153987	0.0443397	0.0111394	0.00475773	0.00140957	0.190378	0.00189963	0.0018701	0.00254344	0.00396919	0.00594795	0.00278689	0.00266614	0.0243386	0.0143132	0.0703919	0.0940512	0.0144723	0.118167	0.0102188	0.0674075	0.00502638	0.125481	0.00174285	0	0.000706027	0.00103716	0.00273352	0.00916944	0.00397858	0.00516731	0.00547997	0.00270491	0.00863877	0.0129701	0.593776	0.0695026	0.0716523	0.00612267	0.0588662
PromE(800)-GAL4	CG18609	CG18609	100172/KK	F	2	0.0111124	0.0188301	0.0169501	0.00973836	0.0148009	0.0418883	0.0113518	0.00460886	0.00153115	0.204874	0.00173106	0.00190333	0.00268833	0.00382533	0.00568888	0.0025701	0.00264518	0.0246619	0.0137711	0.0712382	0.101956	0.0131372	0.108197	0.00999012	0.0626284	0.00457397	0.126946	0.00125562	0.00018432	0.000683874	0.000887465	0.00261013	0.00845817	0.00420786	0.00526332	0.00514773	0.00231866	0.00744989	0.0118676	0.563166	0.0620102	0.057265	0.00643915	0.0578428
PromE(800)-GAL4	CG18609	CG18609	100172/KK	F	3	0.0109175	0.0191403	0.015777	0.0089325	0.014256	0.040535	0.0107192	0.00440615	0.00152188	0.205904	0.00185128	0.00183968	0.00239807	0.0037426	0.00587168	0.00241221	0.00261153	0.026526	0.0128025	0.0624245	0.0901368	0.0122548	0.106598	0.00769401	0.0623103	0.00471771	0.133139	0.00156011	0	0.000715681	0.0010434	0.00263538	0.00872979	0.00369663	0.00521662	0.00609502	0.00299077	0.00817711	0.0112337	0.547278	0.0616404	0.0650297	0.00587338	0.0565662
PromE(800)-GAL4	CG18609	CG18609	100172/KK	F	4	0.0125619	0.0217673	0.017801	0.0093988	0.0165675	0.047518	0.0121109	0.00462403	0.00112251	0.241507	0.00217745	0.00205869	0.0026198	0.00387635	0.00685993	0.00297563	0.0030491	0.031686	0.0154722	0.0746789	0.0997257	0.0171231	0.13186	0.010875	0.0797622	0.00839838	0.16706	0.0014738	0.000255876	0.000777917	0.00106841	0.00283955	0.00981055	0.00422846	0.00549748	0.00610136	0.0030595	0.0104139	0.0137249	0.636981	0.0782892	0.0708906	0.00737648	0.0729583
PromE(800)-GAL4	CG18609	CG18609	100172/KK	F	5	0.00953007	0.0157718	0.0142503	0.00882427	0.0127717	0.0362715	0.00980272	0.00405119	0.00130534	0.175014	0.00148953	0.00150994	0.00234646	0.00330776	0.00484602	0.00226364	0.00218338	0.0211232	0.0117646	0.0587239	0.0900744	0.011344	0.0950657	0.00821627	0.0562005	0.00430912	0.116199	0.00132216	0	0.000727497	0.000787665	0.00218077	0.00694749	0.00407867	0.00434037	0.00442693	0.00212512	0.00697309	0.0106894	0.497996	0.0581405	0.0663084	0.00586984	0.0534441
PromE(800)-GAL4	CG5599	CG5599	106456/KK	F	1	0.0283869	0.0541846	0.041887	0.0378942	0.0378028	0.131033	0.0279167	0.0130493	0.0039412	0.503557	0.00768292	0.00592293	0.00347529	0.0104833	0.0186173	0.00781497	0.0105698	0.0657694	0.0423341	0.177426	0.10736	0.0401415	0.350588	0.013589	0.196236	0.0188847	0.310268	0.00257791	0.000940539	0.00339595	0.00481277	0.00906557	0.0326006	0.0149377	0.0227473	0.0163269	0.010786	0.0396461	0.0421414	2.07889	0.219997	0.216517	0.0173615	0.304492
PromE(800)-GAL4	CG5599	CG5599	106456/KK	F	2	0.0334473	0.0553879	0.0423125	0.0316811	0.0342842	0.117974	0.0271339	0.0127118	0.00423356	0.555299	0.0071479	0.00483413	0.00286128	0.0094796	0.0152623	0.00659904	0.00956369	0.0626482	0.0342315	0.154308	0.0918657	0.0354737	0.294828	0.0136495	0.169077	0.019273	0.305504	0.00201065	0.000876511	0.00337008	0.00369963	0.00666614	0.0257492	0.0132917	0.0190001	0.0134569	0.00832945	0.0364828	0.0307097	1.73512	0.181643	0.190747	0.0167646	0.296381
PromE(800)-GAL4	CG5599	CG5599	106456/KK	F	3	0.0466552	0.0726256	0.0503523	0.0334984	0.041295	0.144063	0.0330217	0.0152126	0.00510964	0.69565	0.00794429	0.00593362	0.00322251	0.0105836	0.0192989	0.00773574	0.0106688	0.0768078	0.0363417	0.171916	0.0832904	0.0384159	0.327701	0.0156288	0.188703	0.0211758	0.358703	0.00204476	0.000819692	0.00315475	0.00308621	0.00731305	0.0273477	0.0127294	0.0184278	0.0140076	0.00944708	0.039971	0.0317499	1.78134	0.20213	0.204599	0.018665	0.310924
PromE(800)-GAL4	CG5599	CG5599	106456/KK	F	4	0.0422036	0.0668315	0.0631187	0.0367328	0.0473597	0.148817	0.0336318	0.0157143	0.00482575	0.661284	0.00986945	0.00734777	0.00343003	0.0120982	0.0191849	0.00824255	0.0115966	0.0721599	0.0502812	0.197239	0.0978271	0.0429926	0.351534	0.0175481	0.203219	0.0225629	0.360133	0.00253298	0.000997853	0.00415417	0.00422144	0.00841032	0.0328864	0.0132582	0.0217889	0.0159022	0.00966775	0.040548	0.0377837	1.97914	0.216003	0.222678	0.0202644	0.335378
PromE(800)-GAL4	CG5599	CG5599	106456/KK	F	5	0.0392317	0.0660301	0.0545569	0.0282577	0.0442849	0.142401	0.0304045	0.0154975	0.00442518	0.624529	0.0112196	0.00664583	0.00243675	0.0114364	0.0202473	0.00771225	0.0116906	0.0755381	0.0433574	0.169047	0.0614499	0.0416859	0.345812	0.0134027	0.19603	0.0212421	0.341415	0.00234172	0.00142156	0.00424273	0.00390009	0.0071564	0.0289104	0.00850562	0.0198823	0.0145693	0.010076	0.0474407	0.0339661	1.6969	0.223198	0.23667	0.0214946	0.378675
PromE(800)-GAL4	CG7724	CG7724	105609/KK	F	1	0.0114174	0.0197452	0.0185451	0.0184248	0.011933	0.0397502	0.0114665	0.00361624	0.0011176	0.220153	0.00166892	0.00188248	0.00230208	0.00353316	0.00547098	0.0022856	0.00279709	0.026137	0.0124233	0.0649281	0.08143	0.0106795	0.106109	0.00658654	0.0593809	0.00548939	0.133491	0.00114143	0	0.00081134	0.000695247	0.00239115	0.00969751	0.00655221	0.00765428	0.0046681	0.00278207	0.0102839	0.0115796	0.751162	0.0697917	0.0618802	0.00614503	0.0809319
PromE(800)-GAL4	CG7724	CG7724	105609/KK	F	2	0.0120006	0.0187722	0.0191277	0.0164628	0.01467	0.0509839	0.0123792	0.0048628	0.00143539	0.225337	0.00177658	0.00181432	0.00216745	0.00396725	0.00560349	0.00284894	0.00281914	0.0231317	0.0157057	0.0807175	0.0780119	0.0156409	0.127376	0.0104067	0.0730827	0.00586186	0.133496	0.00115683	0	0.000869374	0.000861328	0.00264806	0.0107307	0.00602433	0.00722005	0.00472335	0.00298338	0.010771	0.0138575	0.789154	0.0740983	0.0840348	0.00717104	0.0929332
PromE(800)-GAL4	CG7724	CG7724	105609/KK	F	3	0.0158048	0.0252566	0.0258298	0.0195323	0.0194557	0.0655093	0.0149336	0.00593435	0.00165207	0.274398	0.00161616	0.00251355	0.00215252	0.0048505	0.00782843	0.0035426	0.00380824	0.0293319	0.0213987	0.109766	0.0877525	0.0218966	0.169307	0.0111961	0.091352	0.00869095	0.155851	0.00117984	0	0.00108802	0.000549487	0.00354429	0.0139147	0.00677398	0.00998526	0.0050455	0.0030976	0.0135698	0.01717	0.991351	0.084873	0.0803442	0.00736573	0.11376
PromE(800)-GAL4	CG7724	CG7724	105609/KK	F	4	0.015518	0.0221197	0.0242919	0.0218255	0.0171804	0.0557165	0.0133866	0.00509522	0.00142544	0.24983	0.00236443	0.00218395	0.00220749	0.00429281	0.00605436	0.00280766	0.00306833	0.0233372	0.019226	0.0987633	0.0920665	0.0167041	0.137194	0.0121149	0.072602	0.00710576	0.129497	0.00136441	0	0.000970067	0.000659474	0.00294705	0.0120613	0.00656728	0.00839792	0.00471458	0.00260133	0.00960191	0.0145743	0.851917	0.0703718	0.0801745	0.00700857	0.0876215
PromE(800)-GAL4	CG7724	CG7724	105609/KK	F	5	0.013061	0.0231496	0.0206366	0.0144261	0.0168735	0.0516557	0.0120106	0.00483202	0.00148461	0.240647	0.00203972	0.00210608	0.00216706	0.00439842	0.00670788	0.00289216	0.00324416	0.0281085	0.0174369	0.0868424	0.0641053	0.0174173	0.138834	0.00807962	0.0738871	0.00710382	0.134571	0.00102726	0	0.000879386	0.000559338	0.00306694	0.0119942	0.0045023	0.00854126	0.00425808	0.00253246	0.0126896	0.0141569	0.800569	0.069714	0.0715086	0.00601636	0.101084
PromE(800)-GAL4	Irc	CG8913	101098/KK	F	1	0.0148962	0.0206117	0.024454	0.0112489	0.0175494	0.0455965	0.0106632	0.00434002	0.00111842	0.195746	0.00179904	0.00236217	0.00142221	0.00331228	0.00460721	0.00224548	0.00233304	0.017125	0.0177807	0.099107	0.0481645	0.0124692	0.0997936	0.00760657	0.0542019	0.0044835	0.08735	0.000819189	0	0.000747976	0.000500188	0.00277645	0.0079082	0.00449209	0.00668641	0.00319134	0.00188531	0.00799707	0.0109496	0.597206	0.0525822	0.0457129	0.00482332	0.0740274
PromE(800)-GAL4	Irc	CG8913	101098/KK	F	2	0.0147017	0.0210562	0.0250276	0.0109117	0.0187458	0.0504312	0.0106519	0.00458317	0.00120356	0.198281	0.00156531	0.00252203	0.00119686	0.00332334	0.00503839	0.0022948	0.00244626	0.0183709	0.0190829	0.105931	0.0495333	0.0148768	0.108648	0.0086616	0.0585795	0.00374033	0.0931	0.00102913	0	0.000748834	0.000742278	0.00311267	0.0084904	0.00449766	0.00665139	0.00328062	0.00217726	0.00994581	0.0123053	0.635696	0.0558044	0.0482979	0.00392229	0.0804381
PromE(800)-GAL4	Irc	CG8913	101098/KK	F	3	0.0134641	0.0190956	0.0214124	0.00810302	0.0148921	0.0376538	0.00818828	0.00358607	0.00103966	0.182299	0.00153998	0.00193185	0.0012208	0.00267856	0.00377704	0.00161715	0.00175842	0.0152806	0.0155916	0.0955691	0.0374373	0.00952275	0.0821609	0.00561428	0.0396347	0.00283973	0.0741995	0.00059707	0	0.00063023	0.00029697	0.00253	0.00722878	0.00309169	0.00560257	0.00238644	0.00139059	0.00699986	0.00846438	0.513282	0.0368308	0.0337444	0.00266318	0.0604767
PromE(800)-GAL4	Irc	CG8913	101098/KK	F	4	0.0114544	0.0162267	0.0193933	0.00946564	0.0137718	0.0366331	0.00844694	0.00357109	0.000931289	0.163075	0.00116156	0.00199787	0.000722811	0.00267655	0.00386477	0.00168894	0.00192963	0.0149598	0.0143578	0.0816483	0.0391798	0.0098833	0.0857256	0.00608289	0.0446045	0.00389897	0.0794491	0.000724494	0	0.000598415	0.000498107	0.00242007	0.00707839	0.00346205	0.00581774	0.00278024	0.00175463	0.00748982	0.00938895	0.528505	0.046312	0.0436867	0.00392649	0.0665319
PromE(800)-GAL4	Irc	CG8913	101098/KK	F	5	0.0162168	0.0214135	0.0255005	0.0100884	0.0185207	0.0454064	0.00986749	0.00447763	0.00112027	0.201453	0.00158286	0.00224155	0.00140057	0.00305758	0.00430324	0.00189086	0.00200907	0.0160266	0.0170535	0.105346	0.0485553	0.0120169	0.0898243	0.00939274	0.0476764	0.00333008	0.085258	0.000668615	0	0.000583558	0.000322267	0.00253457	0.00737047	0.00373797	0.00548581	0.00248187	0.00160789	0.00804261	0.00947198	0.532063	0.0440885	0.0417014	0.00458026	0.0729914
PromE(800)-GAL4	CG9458	CG9458	102418/KK	F	1	0.0100276	0.0175351	0.0204276	0.0251524	0.014079	0.0378427	0.0119552	0.00349961	0.00140444	0.16618	0.00194047	0.00204412	0.00139119	0.00354824	0.00464408	0.00221632	0.00232376	0.0184273	0.0163423	0.0723192	0.0456737	0.0136186	0.10282	0.00964877	0.0484497	0.00466448	0.0849782	0.000916945	0	0.000746303	0.000477173	0.00250112	0.00870168	0.00387347	0.00703705	0.00321679	0.00195385	0.00811251	0.0123997	0.560008	0.0558864	0.048583	0.0057239	0.0758759
PromE(800)-GAL4	CG9458	CG9458	102418/KK	F	2	0.00800417	0.0136748	0.0167154	0.0194455	0.0115226	0.0313734	0.0100572	0.00286642	0.00131305	0.144002	0.00106208	0.0015203	0.00161722	0.00345309	0.00379173	0.00189832	0.00181167	0.0152824	0.0151528	0.0661465	0.0373584	0.0121174	0.0974218	0.00599284	0.0406873	0.00316618	0.0782944	0.000946225	0	0.000737744	0.000501681	0.00223035	0.0086632	0.00293363	0.00629424	0.00287291	0.00164659	0.00766696	0.011859	0.547678	0.0473497	0.0404742	0.00329257	0.068688
PromE(800)-GAL4	CG9458	CG9458	102418/KK	F	3	0.00930616	0.0162864	0.0174216	0.0182098	0.012319	0.0339714	0.0106968	0.00328556	0.00137922	0.168493	0.00140813	0.00166321	0.000736389	0.00279058	0.00381191	0.00200572	0.0020062	0.017093	0.0153199	0.0715247	0.0350225	0.0130266	0.0956465	0.00835194	0.0448784	0.00440743	0.0804664	0.000900551	0	0.000702655	0.000578154	0.00225724	0.00876568	0.00269901	0.00622424	0.0028177	0.00180932	0.00797679	0.0114805	0.528864	0.0495621	0.0408102	0.00464062	0.0808262
PromE(800)-GAL4	CG9458	CG9458	102418/KK	F	4	0.00902469	0.0140355	0.0175761	0.0204482	0.0115801	0.032957	0.0105875	0.00293845	0.00119473	0.153762	0.00173547	0.00156175	0.00110776	0.00296727	0.00343147	0.00181225	0.00180915	0.0138938	0.0153885	0.0693846	0.0378532	0.011003	0.0932564	0.00779257	0.0402121	0.00369047	0.0747482	0.00106783	0	0.000624412	0.000585492	0.00210447	0.00815629	0.00323539	0.00586289	0.00266399	0.0015633	0.00607607	0.0112283	0.518883	0.0438803	0.041149	0.00361365	0.0619146
PromE(800)-GAL4	CG9458	CG9458	102418/KK	F	5	0.00910787	0.0155094	0.0168291	0.017444	0.0117467	0.032725	0.00995392	0.0030522	0.00116331	0.16078	0.00154105	0.00164912	0.000698765	0.00264402	0.00361731	0.00190585	0.00188633	0.0157805	0.0142729	0.0678479	0.0313662	0.0119517	0.0897319	0.00780809	0.0423416	0.00399611	0.0751385	0.000858172	0	0.000687557	0.000617863	0.0021872	0.00794483	0.00289322	0.00596423	0.00275123	0.00174867	0.00743282	0.0107424	0.494873	0.0489348	0.0367178	0.00433861	0.0756743
PromE(800)-GAL4	Nrt	CG9704	106080/KK	F	1	0.0115017	0.0174679	0.0239739	0.0147509	0.0162152	0.0432458	0.0121507	0.00432067	0.00145531	0.185847	0.00173722	0.00246749	0.00229724	0.00399997	0.00456746	0.00255785	0.00215352	0.0171418	0.0202395	0.095014	0.0617224	0.0143521	0.113918	0.0106145	0.0549763	0.00514741	0.0913773	0.000870618	0	0.000859546	0.000796014	0.00306999	0.0105446	0.00430067	0.00807495	0.0038116	0.00258804	0.00779364	0.013407	0.687061	0.0635015	0.0501899	0.00610709	0.0786743
PromE(800)-GAL4	Nrt	CG9704	106080/KK	F	2	0.0149079	0.023337	0.0291367	0.0158043	0.0236143	0.0579691	0.0149283	0.00531569	0.00182985	0.241969	0.00236228	0.003093	0.00247887	0.00464448	0.0064069	0.00351705	0.00279588	0.0239444	0.0277643	0.114037	0.0590581	0.0226846	0.154485	0.013412	0.0751701	0.00501211	0.125493	0.00115066	0.000219965	0.00120542	0.00125217	0.00409968	0.0136174	0.00503171	0.00993837	0.00529364	0.00361667	0.0127094	0.0192875	0.86832	0.0899523	0.0700121	0.00586976	0.116264
PromE(800)-GAL4	Nrt	CG9704	106080/KK	F	3	0.0124825	0.0185822	0.0234159	0.0152301	0.0162754	0.0428854	0.0115313	0.00412078	0.00149221	0.196456	0.00223861	0.00230364	0.00245733	0.00371441	0.00472152	0.00247216	0.00215935	0.0185231	0.0209594	0.0923909	0.0634936	0.0143573	0.118725	0.00889232	0.0517887	0.00431064	0.0990722	0.000895996	0	0.000988729	0.000573811	0.00303603	0.0109399	0.00425226	0.00818103	0.00380209	0.00205321	0.00844012	0.0140346	0.72597	0.0588706	0.0508187	0.00428797	0.0743397
PromE(800)-GAL4	Nrt	CG9704	106080/KK	F	4	0.0171464	0.0236779	0.0294369	0.0194702	0.0214527	0.0581866	0.0153728	0.006033	0.0018179	0.27542	0.00257283	0.00265608	0.00252151	0.00476171	0.00567443	0.00294513	0.00247735	0.0235822	0.0265353	0.120659	0.0979992	0.0186343	0.152199	0.014943	0.0723485	0.00662182	0.14064	0.00149628	0	0.00112984	0.000907905	0.00343198	0.0132222	0.00669416	0.00867427	0.00491055	0.00264117	0.0103705	0.0179231	0.902935	0.0805484	0.0670297	0.00745845	0.102819
PromE(800)-GAL4	Nrt	CG9704	106080/KK	F	5	0.0123766	0.0184061	0.0232495	0.0145876	0.0162237	0.0402942	0.0117499	0.00427788	0.00164759	0.199908	0.00111775	0.00204125	0.00213643	0.00340125	0.00398077	0.00226752	0.00192609	0.0182284	0.0195511	0.088354	0.0539876	0.0134376	0.107542	0.012077	0.0464791	0.00372773	0.0999243	0.000780336	0	0.000875479	0.000401654	0.00280401	0.0102876	0.00418497	0.00746975	0.0033532	0.00193285	0.00858826	0.0131368	0.687736	0.0570229	0.0430523	0.00441325	0.084117
PromE(800)-GAL4	CG9801	CG9801	104525/KK	F	1	0.0110746	0.0177456	0.0172827	0.00912457	0.0123972	0.0377821	0.00912783	0.00340106	0.000990091	0.196393	0.00155331	0.00170204	0.00116867	0.00268835	0.00441403	0.0017818	0.00205942	0.0191257	0.0136683	0.0717711	0.0509396	0.0103464	0.0917252	0.00763253	0.0492694	0.00520716	0.102135	0.000905426	0	0.000717583	0.000575399	0.00211484	0.00753726	0.00388432	0.00550992	0.00315692	0.0018893	0.00857872	0.00998427	0.585087	0.0507434	0.0474859	0.00497649	0.0770778
PromE(800)-GAL4	CG9801	CG9801	104525/KK	F	2	0.00982552	0.0152182	0.0159583	0.00808677	0.0123435	0.0372613	0.00831255	0.00345889	0.000956342	0.168242	0.00150451	0.00147984	0.00100917	0.00257381	0.00398998	0.00179572	0.00193751	0.0162248	0.0121643	0.0651133	0.0434935	0.0103271	0.0908008	0.00762975	0.0497394	0.00494312	0.0924329	0.000799795	0	0.00066783	0.000534664	0.0018439	0.00689923	0.00339484	0.00469529	0.0027825	0.00172073	0.00842157	0.0098841	0.544137	0.0530122	0.0462862	0.00474451	0.0779878
PromE(800)-GAL4	CG9801	CG9801	104525/KK	F	3	0.0103914	0.0162851	0.0168457	0.00850204	0.0121349	0.0351252	0.00842713	0.0033898	0.000928498	0.17298	0.00151891	0.00163876	0.00107915	0.00254343	0.00384303	0.00174545	0.00191114	0.016357	0.012541	0.0698794	0.0430888	0.00930562	0.0850152	0.00628395	0.0456559	0.00477484	0.0879809	0.000731678	0	0.000646226	0.000521176	0.00203319	0.00686988	0.00360878	0.00505329	0.00277947	0.00152789	0.00726592	0.00904128	0.53568	0.0479238	0.0501494	0.00444344	0.0691323
PromE(800)-GAL4	CG9801	CG9801	104525/KK	F	4	0.0102751	0.01652	0.0177708	0.00966791	0.0136161	0.0385993	0.00857974	0.00352339	0.00113089	0.171358	0.0011357	0.00167791	0.00110986	0.00290878	0.00462528	0.00190366	0.00210669	0.0184968	0.0139697	0.068615	0.046164	0.0106609	0.100126	0.00546353	0.0504511	0.00444173	0.0956519	0.000852197	0	0.000762081	0.000478347	0.00225616	0.00731158	0.00419672	0.00577313	0.00330003	0.00183551	0.00878882	0.0107441	0.601235	0.0499391	0.0520825	0.00397393	0.0698532
PromE(800)-GAL4	CG9801	CG9801	104525/KK	F	5	0.00969641	0.0145236	0.014595	0.00771089	0.0103914	0.0314043	0.00765965	0.00291216	0.000879927	0.170549	0.00141764	0.00137426	0.000892804	0.00229011	0.00351488	0.00145633	0.00164315	0.0157876	0.0111892	0.0578853	0.0397549	0.00782785	0.0805134	0.00585066	0.041182	0.00451288	0.0868649	0.000778233	0	0.000593674	0.000512956	0.00169128	0.00651658	0.00323588	0.00441213	0.00261941	0.00148845	0.00673411	0.00825722	0.516566	0.0433527	0.0436768	0.0037354	0.0624949
PromE(800)-GAL4	Cyp49a1	CG18377	101530/KK	F	1	0.00803417	0.0144322	0.011642	0.00899088	0.00862514	0.0271686	0.00784371	0.00317773	0.0011681	0.147329	0.00102314	0.00149708	0.00115985	0.00217341	0.00402341	0.00185886	0.00189901	0.0172742	0.00848305	0.0403338	0.0366233	0.00857936	0.0694813	0.00791199	0.0435457	0.00511339	0.0817676	0.000543352	0	0.000360765	0.00052545	0.00170907	0.00477571	0.00357756	0.00379071	0.0029872	0.00248384	0.00812602	0.00726178	0.406007	0.0573058	0.0490026	0.00668792	0.072667
PromE(800)-GAL4	Cyp49a1	CG18377	101530/KK	F	2	0.0096398	0.0165397	0.0140269	0.0128556	0.0102784	0.0308808	0.00937099	0.00334588	0.00136436	0.173945	0.00113037	0.00178715	0.000980514	0.00234473	0.00434878	0.00209382	0.00219381	0.0195499	0.0103128	0.0467561	0.0483472	0.00953854	0.0791005	0.00889664	0.048142	0.0057938	0.0959383	0.000650299	0	0.000413586	0.000559768	0.00196287	0.00579754	0.00499303	0.00463626	0.00360433	0.00298711	0.00912401	0.00843838	0.507793	0.0692113	0.0502459	0.00412183	0.0774476
PromE(800)-GAL4	Cyp49a1	CG18377	101530/KK	F	3	0.010718	0.0177014	0.0168405	0.0161455	0.0119868	0.0374521	0.0113418	0.0041728	0.00154643	0.196604	0.00143946	0.00207659	0.00190639	0.00316317	0.00543913	0.0024339	0.00251828	0.0218657	0.0129375	0.0584714	0.0656892	0.0116831	0.101926	0.0103851	0.0623271	0.00707572	0.113348	0.000841321	0	0.00067877	0.000718388	0.00245627	0.00724482	0.00643762	0.00552256	0.00471008	0.00360713	0.0100618	0.0112323	0.647117	0.0819505	0.0735737	0.00969722	0.0925128
PromE(800)-GAL4	Cyp49a1	CG18377	101530/KK	F	4	0.0100657	0.0178373	0.0138194	0.00962656	0.00984631	0.0317155	0.00881745	0.00327902	0.000896437	0.170636	0.00123028	0.00189672	0.00132627	0.00271835	0.00502295	0.0020649	0.00220928	0.0208146	0.00987205	0.0489016	0.0377305	0.0100115	0.0827522	0.00914118	0.0506048	0.00586207	0.0914001	0.000752372	0	0.000451939	0.000710877	0.00222373	0.00585974	0.00380485	0.00470452	0.00370993	0.00305531	0.00956405	0.00824144	0.44925	0.0590107	0.0549662	0.0058547	0.0777632
PromE(800)-GAL4	Cyp49a1	CG18377	101530/KK	F	5	0.0107166	0.0190597	0.0151746	0.0104405	0.011358	0.0346445	0.0100874	0.00401079	0.00155557	0.18214	0.00139341	0.00206209	0.000775149	0.00261693	0.00523928	0.0022878	0.00230803	0.0220192	0.0110977	0.0526892	0.038739	0.0109217	0.0904475	0.0100662	0.0537745	0.00649558	0.098101	0.000636655	0	0.000674612	0.000736415	0.00241609	0.0058716	0.00419115	0.00515244	0.00399313	0.00327375	0.0103444	0.00957216	0.494749	0.0722605	0.0569868	0.00874819	0.087749
PromE(800)-GAL4	KK Control	Control	60100/KK	F	1	0.0140593	0.0241066	0.0181223	0.00910829	0.017626	0.044097	0.0134694	0.00535807	0.00168319	0.232584	0.00214114	0.00233153	0.000880625	0.00351352	0.00646811	0.00304985	0.00300143	0.0265881	0.0131762	0.0627837	0.0328163	0.0139897	0.112523	0.0102492	0.0746221	0.0085417	0.121565	0.000904093	0.000242842	0.000915188	0.000899739	0.00268505	0.00764483	0.00424137	0.00580086	0.00465629	0.00397191	0.0144965	0.0112259	0.531675	0.0941451	0.0972262	0.0113643	0.130369
PromE(800)-GAL4	KK Control	Control	60100/KK	F	2	0.014303	0.0242193	0.0194171	0.0100205	0.0178048	0.0450468	0.0144011	0.00567677	0.00191209	0.230725	0.00194596	0.00254181	0.00102587	0.00369301	0.00654076	0.00331601	0.00311255	0.0269515	0.0139559	0.0679741	0.0353936	0.0143998	0.118543	0.0122787	0.0752196	0.00893296	0.119273	0.00088836	0.000227727	0.000927706	0.000954454	0.00305273	0.00918683	0.00377785	0.00682595	0.0048934	0.00416538	0.0136858	0.0119231	0.564372	0.0935218	0.0692906	0.0118008	0.124298
PromE(800)-GAL4	KK Control	Control	60100/KK	F	3	0.0161324	0.0265386	0.0235271	0.0122422	0.0211636	0.0520097	0.0153134	0.00599605	0.00200994	0.243286	0.00240862	0.0030763	0.00128183	0.00430813	0.00770944	0.003328	0.00350152	0.0271854	0.0170677	0.0810832	0.0420195	0.0158107	0.13372	0.0124359	0.0805483	0.00907986	0.121898	0.00101893	0.000223783	0.00106618	0.00109922	0.00355564	0.0105389	0.00441177	0.00751699	0.00549826	0.00429262	0.0131021	0.0134919	0.650461	0.0943042	0.0811453	0.0112999	0.11816
PromE(800)-GAL4	KK Control	Control	60100/KK	F	4	0.011591	0.0198296	0.0155923	0.00915084	0.0132371	0.0350688	0.0113517	0.0041191	0.00154368	0.196306	0.00162243	0.00192996	0.000864546	0.0028253	0.00497129	0.0025074	0.00242311	0.0231215	0.0104864	0.0512089	0.0341168	0.0106167	0.088492	0.0105374	0.0561746	0.00707448	0.107541	0.000759596	0	0.000506621	0.000748717	0.00218265	0.00702483	0.00364868	0.0050614	0.0040789	0.00315928	0.011048	0.00908348	0.470174	0.0720252	0.0620992	0.00684772	0.0927052
PromE(800)-GAL4	KK Control	Control	60100/KK	F	5	0.0145126	0.0247188	0.0193663	0.0103248	0.0180347	0.0471628	0.0146821	0.00566179	0.00187128	0.237575	0.0023995	0.00244886	0.00101907	0.00381625	0.00719449	0.00299105	0.0032785	0.027835	0.014023	0.0664783	0.03609	0.0146998	0.122642	0.0114435	0.0788845	0.00924515	0.128149	0.00104927	0.000326706	0.00110445	0.00101972	0.00265525	0.00811793	0.00434588	0.00606433	0.00415072	0.00349322	0.0149765	0.0122973	0.582055	0.0990888	0.0855783	0.0116315	0.13056
[truncated: 14 more columns]

## Sheet: E
Driver	UAS-RNAi	CG Number	Transformant ID	Sex	Sample	n-C21 (1)	n-C22 (4)	7,11-C23:2 (5)	2-Me-C22 (6)	9-C23:1 (8)	7-C23:1 (9)	6-C23:1 (10)	5-C23:1 (11)	x-C23:1 (12)	n-C23 (13)	11-/ 9-Me-C23 (14)	7,11-C24:2 (15)	x,y-C24:2 (16)	3-Me-C23/ 9-C24:1 (17)	6-C24:1 (19)	NI (20)	5-C24:1 (21)	n-C24 (22)	9,13-C25:2 (23)	7,11-C25:2 (24)	2-Me-C24 (25)	6,10-C25:2 (26)	9-C25:1/ 5,9-C25:2 (27)	8-C25:1 (28)	7-C25:1 (29)	5-C25:1 (31)	n-C25 (32)	NI (33)	NI (34)	13-/11-Me-C25 (35)	5-Me-C25 (36)	8,12-C26:2 (37)	7,11-C26:2 (38)	2-Me-C25 (39)	6,10-C26:2 (40)	3-Me-C25/ 9-C26:1 (41)	7-C26:1 (42)	n-C26 (44)	9,13-C27:2 (45)	7,11-C27:2/ 2-Me-C26 (46)	5,9-C27:2/ 9-C27:1 (47)	7-C27:1 (48)	5-C27:1 (49)	n-C27 (50)
PromE(800)-GAL4	GD Control	Control	60000/GD	F	1	0.00643478	0.0138427	0.00986109	0.00604975	0.0063001	0.0198808	0.00708288	0.00212975	0.00150733	0.16563	0.00131826	0.00112211	0.000780425	0.0018955	0.00399061	0.00105704	0.00157959	0.0241854	0.0099527	0.0360179	0.0387039	0.00621898	0.0760882	0.00749911	0.0277543	0.00478484	0.15015	0.000720941	0.000215261	0.000538681	0.000295107	0.00164179	0.00603751	0.00406817	0.00492956	0.00346032	0.00239553	0.0153328	0.0109148	0.606667	0.0599309	0.0349225	0.00351737	0.0898412
PromE(800)-GAL4	GD Control	Control	60000/GD	F	2	0.00805839	0.0167667	0.012495	0.0089043	0.00927054	0.0290506	0.00891247	0.00285728	0.00169658	0.191245	0.00175396	0.00139571	0.000611461	0.00275219	0.00544442	0.00162514	0.00213022	0.0284936	0.0132277	0.051585	0.065118	0.0110666	0.107432	0.00941097	0.0435129	0.00579299	0.180977	0.00127544	0.000315871	0.000778009	0.000333111	0.00228464	0.00953652	0.00445423	0.00593783	0.00488439	0.00363295	0.0201459	0.0159713	0.782074	0.0834647	0.0582683	0.00545532	0.116314
PromE(800)-GAL4	GD Control	Control	60000/GD	F	3	0.00740812	0.0162485	0.0103801	0.00672279	0.00714177	0.021722	0.00767449	0.00229179	0.00157219	0.190406	0.00141455	0.00123607	0.000408927	0.00197839	0.00449584	0.00115894	0.00173156	0.0274118	0.0102944	0.0354777	0.0401023	0.00591173	0.0768749	0.00785872	0.0285699	0.00304888	0.161521	0.000690074	0	0.000382489	0.000584009	0.00183733	0.00564088	0.00463694	0.00469148	0.00369761	0.00274761	0.0164959	0.0103742	0.59728	0.0647981	0.0413381	0.00421696	0.107523
PromE(800)-GAL4	GD Control	Control	60000/GD	F	4	0.00743888	0.0172036	0.0118437	0.0082362	0.00764681	0.0241728	0.00856177	0.00250089	0.00165281	0.186223	0.00162554	0.00139603	0.000590032	0.00239855	0.00476123	0.0016118	0.0019849	0.0292942	0.0118807	0.0450921	0.0580811	0.00815482	0.0902466	0.0100736	0.0341844	0.00540523	0.165764	0.000948855	0.000222603	0.00063328	0.000737348	0.00239265	0.0079911	0.00503787	0.00654358	0.00443111	0.00305755	0.0175882	0.0118495	0.697842	0.0650416	0.0435567	0.00451566	0.105817
PromE(800)-GAL4	GD	Control	60000/GD	F	5	0.00729406	0.0170248	0.0117421	0.00766065	0.00695967	0.0224838	0.00814253	0.00204726	0.000756192	0.186598	0.00128234	0.0017138	0.00132405	0.00229117	0.00331187	0.000543125	0.00143066	0.0292863	0.0112919	0.0436022	0.0582288	0.00808093	0.0882678	0.00969549	0.0307727	0.00278677	0.162139	0.00109525	0.000375032	0.000320329	0.000652636	0.00124733	0.00796031	0.0036752	0.0031621	0.00236396	0.000909728	0.0175613	0.0091449	0.695759	0.0624443	0.037564	0.00129731	0.103367
PromE(800)-GAL4	Pxd	CG3477	48587/GD	F	1	0.0196534	0.0381251	0.0256606	0.0102439	0.0215033	0.0640088	0.0168648	0.00612117	0.00199296	0.366055	0.00321985	0.00341667	0.00127929	0.00581294	0.0117221	0.00390821	0.00456943	0.0483	0.024315	0.0990873	0.0466061	0.0211906	0.208356	0.0129732	0.107528	0.0140311	0.223981	0.00129208	0.000523495	0.00166027	0.00113864	0.00457055	0.0152753	0.00527106	0.0102972	0.00784005	0.00654604	0.0284424	0.022726	1.09904	0.150167	0.150679	0.0125455	0.206001
PromE(800)-GAL4	Pxd	CG3478	48587/GD	F	2	0.0160916	0.0307021	0.0229316	0.00965989	0.0188915	0.0561533	0.0156799	0.00591439	0.0020148	0.299476	0.00242556	0.00300048	0.000700995	0.00479818	0.00950013	0.00357486	0.00383845	0.0379125	0.020616	0.0859018	0.0449282	0.0189464	0.176212	0.0124871	0.0945033	0.0126091	0.181255	0.00117684	0.00038981	0.0012942	0.00120633	0.00406469	0.0121998	0.005899	0.00916377	0.00719244	0.00587373	0.0206491	0.0196622	0.938768	0.132689	0.137437	0.0117389	0.159577
PromE(800)-GAL4	Pxd	CG3479	48587/GD	F	3	0.0159191	0.0303747	0.0214675	0.00883863	0.0178166	0.0539687	0.0145339	0.00565096	0.00177147	0.287194	0.00233133	0.00291273	0.00108548	0.00468822	0.00928703	0.00347909	0.00378477	0.0374128	0.0195399	0.0817566	0.0403187	0.0181799	0.169255	0.0104458	0.0933949	0.0125958	0.173254	0.001073	0.000413499	0.00127342	0.00109663	0.00385762	0.013331	0.00371848	0.00888123	0.00672208	0.00572064	0.0219491	0.018493	0.881936	0.123943	0.133612	0.0107411	0.15949
PromE(800)-GAL4	Pxd	CG3480	48587/GD	F	4	0.0327699	0.0591626	0.0417844	0.0154574	0.0349006	0.10164	0.0263829	0.00958037	0.00290997	0.521674	0.00405024	0.00543736	0.00186451	0.0086395	0.0176342	0.00601586	0.00692009	0.0653933	0.0368173	0.147939	0.0639866	0.0341045	0.301326	0.0193427	0.161832	0.0206578	0.290326	0.00164372	0.000574576	0.00199837	0.00152058	0.00660226	0.0207368	0.0080268	0.0147909	0.0110218	0.00941773	0.0355845	0.0311655	1.45075	0.205228	0.215398	0.0135761	0.255407
PromE(800)-GAL4	Pxd	CG3481	48587/GD	F	5	0.0341938	0.064956	0.0407864	0.0148647	0.0347176	0.101934	0.0252303	0.00898376	0.00259154	0.587368	0.00439765	0.00578394	0.00181251	0.00882099	0.0185149	0.0060573	0.00700225	0.0774447	0.0372389	0.146793	0.0577729	0.0321859	0.31127	0.0144174	0.159231	0.0208647	0.326398	0.00158332	0.000660681	0.00212794	0.00185618	0.00695702	0.0228797	0.00623194	0.0149098	0.0116993	0.0104243	0.0444011	0.0317939	1.49278	0.210822	0.211006	0.0133571	0.304204
PromE(800)-GAL4	Prx6005	CG3083	25020/GD	F	1	0.0108262	0.0222971	0.0143872	0.00634201	0.0101949	0.0342231	0.0102122	0.00354574	0.00144872	0.244177	0.00165049	0.00173789	0.000574715	0.00285257	0.00583545	0.00197072	0.00311134	0.0351249	0.0119135	0.0512546	0.0467638	0.0109697	0.101186	0.012115	0.0525245	0.00755833	0.179776	0.00101378	0.000223805	0.000804919	0.000701424	0.00221649	0.00824869	0.00429633	0.00617035	0.00481427	0.00344047	0.018938	0.0123569	0.687114	0.0811639	0.078252	0.00568435	0.124732
PromE(800)-GAL4	Prx6005	CG3083	25020/GD	F	2	0.00950068	0.0189283	0.0124783	0.00523083	0.00811824	0.0280774	0.00851071	0.00277811	0.00119106	0.21581	0.00140071	0.00144236	0.00102849	0.00242938	0.00451049	0.00165448	0.00255782	0.029309	0.0102979	0.0451815	0.0429815	0.00865355	0.0834454	0.01006	0.0403285	0.0061202	0.157928	0.000885298	0.000194041	0.000669482	0.000608104	0.00182754	0.00618789	0.00454689	0.00520351	0.00396092	0.00247994	0.0145077	0.0101437	0.590591	0.0634113	0.0578903	0.00522134	0.0957134
PromE(800)-GAL4	Prx6005	CG3083	25020/GD	F	3	0.00999147	0.0195296	0.0135798	0.00640926	0.00959251	0.0313374	0.00916195	0.00289259	0.00117136	0.207934	0.00153403	0.00159978	0.00105245	0.00263854	0.00535688	0.00168914	0.00283261	0.0291641	0.0117745	0.047537	0.049799	0.0102836	0.0946031	0.0105195	0.0471729	0.00647012	0.157822	0.00105539	0.000216912	0.000744576	0.000558715	0.00194293	0.00776002	0.00421023	0.00538306	0.00435198	0.00298145	0.0157144	0.0125016	0.653887	0.0795098	0.0724486	0.00662897	0.0961844
PromE(800)-GAL4	Prx6005	CG3083	25020/GD	F	4	0.0108379	0.0209799	0.0137958	0.00640844	0.00928012	0.0316852	0.00978592	0.00312892	0.00122709	0.239915	0.00167048	0.00154619	0.00104813	0.00267657	0.0051216	0.0018333	0.00288705	0.0323069	0.0110188	0.0480463	0.0503205	0.00983081	0.0915406	0.0110864	0.0471712	0.00667479	0.182318	0.00125944	0	0.000778807	0.000490704	0.00190702	0.00736157	0.00456699	0.00549728	0.00433312	0.0026251	0.0164965	0.0116737	0.660089	0.0783192	0.0713083	0.00714153	0.110579
PromE(800)-GAL4	Prx6005	CG3083	25020/GD	F	5	0.0114051	0.022665	0.0148875	0.00681025	0.01022	0.0355497	0.0104981	0.00343124	0.00129749	0.241169	0.0019543	0.00172781	0.00117309	0.00305283	0.00606287	0.00202744	0.00336409	0.0342857	0.0122876	0.0526409	0.0536153	0.0109287	0.103949	0.0128765	0.0518333	0.00712055	0.186351	0.00119153	0.000308404	0.000864521	0.000699119	0.00218846	0.0084478	0.00453314	0.00611324	0.00507536	0.00337888	0.0192176	0.0130677	0.698106	0.0791469	0.0822373	0.00728313	0.112973
PromE(800)-GAL4	pxn	CG12002	15276/GD	F	1	0.00767697	0.0150678	0.00829722	0.00670063	0.0063586	0.0205402	0.00779544	0.0023468	0.0013953	0.181068	0.00149948	0.000883927	0.000984065	0.00200256	0.00337794	0.00123681	0.0014135	0.0291207	0.00643241	0.0301059	0.0452932	0.006115	0.0732289	0.0078776	0.0349956	0.00538557	0.17442	0.000846487	0.000325363	0.000635132	0.000595363	0.00130471	0.00581274	0.00430311	0.00442925	0.00430389	0.0030146	0.0195675	0.0099319	0.548656	0.0690503	0.0629661	0.0062377	0.10558
PromE(800)-GAL4	pxn	CG12002	15276/GD	F	2	0.00811819	0.0143811	0.00890991	0.00732679	0.00673459	0.0215655	0.00827938	0.00261597	0.00159985	0.193955	0.00160969	0.000901096	0.00115796	0.00217454	0.00306497	0.00142084	0.00134507	0.0263236	0.00722228	0.0337508	0.0537933	0.00672712	0.0801242	0.00890835	0.0367579	0.00574078	0.186363	0.000949312	0.000317358	0.000728367	0.000690595	0.00142785	0.00664137	0.00499528	0.00445327	0.00449249	0.00285535	0.0179488	0.010661	0.628611	0.0731137	0.0664271	0.00577851	0.110666
PromE(800)-GAL4	pxn	CG12002	15276/GD	F	3	0.00933513	0.0178819	0.00975891	0.00743281	0.0075903	0.0238946	0.00911335	0.00279433	0.00172882	0.222395	0.00155322	0.00104563	0.000945383	0.00228403	0.00347312	0.00162279	0.00158866	0.030616	0.00763033	0.0365205	0.0531058	0.00754193	0.0827693	0.00941436	0.0394136	0.00587366	0.180015	0.000864317	0.00021226	0.000680177	0.000590557	0.00154401	0.00678845	0.00490085	0.00495454	0.00429172	0.00258562	0.0170831	0.0105815	0.624001	0.0682066	0.0551072	0.00628787	0.116037
PromE(800)-GAL4	pxn	CG12002	15276/GD	F	4	0.00862931	0.0154602	0.00896252	0.00713552	0.00673945	0.0215229	0.00846716	0.00247297	0.00162125	0.202715	0.00154598	0.000900569	0.0010142	0.00202401	0.0031173	0.00122358	0.0013011	0.0260169	0.00646814	0.0319522	0.0494791	0.0059219	0.0731791	0.00845581	0.0343144	0.00494646	0.163597	0.000801985	0.000225888	0.000650785	0.000550951	0.00129622	0.00571642	0.00468992	0.00414127	0.00391005	0.00221836	0.0131748	0.00943651	0.564091	0.0628474	0.0490125	0.00585788	0.0904146
PromE(800)-GAL4	pxn	CG12002	15276/GD	F	5	0.00824436	0.0150894	0.00884005	0.00702806	0.00664114	0.0208752	0.00806669	0.00227114	0.00152947	0.194079	0.0016021	0.000884411	0.0010091	0.00201901	0.00297345	0.00137013	0.00129816	0.0261579	0.00643259	0.0308018	0.0492694	0.0057714	0.0717032	0.00807028	0.0333119	0.00466023	0.162079	0.000846302	0.000274687	0.000712362	0.00050974	0.00127911	0.00548894	0.00494676	0.00406019	0.00399816	0.00216709	0.0139249	0.0095637	0.573989	0.0655464	0.0520708	0.00586375	0.092123
PromE(800)-GAL4	Cyp4s3	CG9081	38217/GD	F	1	0.032996	0.0578907	0.0301752	0.0146091	0.0315338	0.0889168	0.0285071	0.0102932	0.00496818	0.5555	0.00421935	0.00450791	0.00156563	0.00777916	0.0160225	0.00575234	0.00578808	0.0699996	0.0266586	0.119736	0.0563457	0.0316916	0.289432	0.0231479	0.143146	0.0190566	0.323506	0.00133705	0.000671313	0.00201731	0.00185926	0.00668158	0.018079	0.00803186	0.0148723	0.0115085	0.0106282	0.0396968	0.0301415	1.35902	0.218781	0.201006	0.0200082	0.307095
PromE(800)-GAL4	Cyp4s3	CG9081	38217/GD	F	2	0.0138638	0.0244439	0.0120194	0.0103723	0.0122911	0.0348944	0.0132498	0.00295793	0.00242899	0.313109	0.0021962	0.00129782	0.000772248	0.00322576	0.00522432	0.00230084	0.00178586	0.0416378	0.011846	0.0403152	0.0510753	0.0117171	0.122854	0.0118096	0.0611579	0.00767968	0.2862	0.00103304	0.000467867	0.000821403	0.00119411	0.00163886	0.00891838	0.00584962	0.0040716	0.00697316	0.0054177	0.0297222	0.0200223	0.858648	0.140063	0.130197	0.0115673	0.19399
PromE(800)-GAL4	Cyp4s3	CG9081	38217/GD	F	3	0.010281	0.0177459	0.0104074	0.00890746	0.0109915	0.032158	0.010991	0.00319569	0.00180835	0.213899	0.0020446	0.00116579	0.000927389	0.00316317	0.00522456	0.00213537	0.00179924	0.0297004	0.010224	0.0412523	0.0465473	0.012754	0.127696	0.0101635	0.0628711	0.00722864	0.212106	0.00134286	0.000589536	0.00092848	0.00102101	0.00190122	0.0091881	0.00542557	0.00498324	0.00678397	0.0055542	0.0254525	0.020639	0.845295	0.143519	0.148882	0.0106602	0.169877
PromE(800)-GAL4	Cyp4s3	CG9081	38217/GD	F	4	0.0319231	0.0544899	0.0315954	0.0142985	0.0321559	0.0904044	0.0285708	0.00987413	0.0048194	0.515864	0.00451143	0.00458461	0.00165695	0.00787275	0.0170553	0.00503042	0.00567813	0.0632168	0.0279505	0.123936	0.0495053	0.0302164	0.300636	0.0195582	0.144167	0.0173864	0.291261	0.00148434	0.000721255	0.00214716	0.00190929	0.00676932	0.0219186	0.00420497	0.0151444	0.0118547	0.0109175	0.0356517	0.0319192	1.42815	0.22911	0.219956	0.0179821	0.27344
PromE(800)-GAL4	Cyp4s3	CG9081	38217/GD	F	5	0.0342926	0.0588152	0.0331039	0.0146801	0.0345634	0.0961119	0.0296087	0.0109119	0.00504256	0.559534	0.00491786	0.00494015	0.00171235	0.00853654	0.0173701	0.00633396	0.00611862	0.0684473	0.0298843	0.133021	0.0514427	0.0332201	0.322458	0.0203294	0.155224	0.0196312	0.312535	0.00146231	0.000791191	0.00239067	0.00218728	0.00752657	0.023273	0.00451105	0.0161784	0.012612	0.0114663	0.0394233	0.0337855	1.49171	0.238472	0.226693	0.017617	0.300865
PromE(800)-GAL4	CG14688	CG14688	39840/GD	F	1	0.0207324	0.0296627	0.0294138	0.021996	0.0233347	0.0567703	0.0208652	0.00539094	0.00354105	0.379775	0.00238163	0.00267468	0.00369193	0.00506052	0.00672034	0.00327046	0.00325027	0.0399721	0.0250947	0.106646	0.132323	0.0201119	0.187987	0.0222086	0.0744616	0.00848026	0.266981	0.00136938	0.000206388	0.000991703	0.00107383	0.00372222	0.0184344	0.0106689	0.0104696	0.00780319	0.00470899	0.0180556	0.027392	1.37463	0.135068	0.0941624	0.0116476	0.138049
PromE(800)-GAL4	CG14688	CG14688	39840/GD	F	2	0.0135842	0.0235759	0.0156136	0.0103964	0.0130452	0.0346027	0.0114078	0.00326591	0.00209702	0.280464	0.0016668	0.00184513	0.00177389	0.00314117	0.00514387	0.0021024	0.0023096	0.0348538	0.0123833	0.0528385	0.0691323	0.0118242	0.108721	0.0114293	0.0487086	0.00603177	0.201828	0.000860227	0	0.00068301	0.000818855	0.002405	0.00840415	0.00737177	0.0066582	0.00543846	0.00368568	0.0171304	0.0146025	0.822175	0.08927	0.0779926	0.00768659	0.114659
PromE(800)-GAL4	CG14688	CG14688	39840/GD	F	3	0.0175998	0.0306356	0.0205184	0.0130369	0.0173924	0.0449924	0.0148443	0.00422842	0.00260781	0.346229	0.00210551	0.00238687	0.00218701	0.00408158	0.00692037	0.00275019	0.00304959	0.0440767	0.01578	0.0683012	0.0833394	0.0158003	0.1394	0.0154905	0.0638991	0.00766496	0.242503	0.00110797	0	0.000899784	0.000996073	0.0030847	0.0110527	0.00860899	0.00850413	0.00672165	0.00486915	0.0220136	0.0184453	1.00639	0.117891	0.0853662	0.0106129	0.150462
PromE(800)-GAL4	CG14688	CG14688	39840/GD	F	4	0.0146068	0.0254688	0.0178104	0.0114317	0.0148497	0.039816	0.0128892	0.00366321	0.00215606	0.280382	0.00214194	0.00204594	0.00175761	0.0035545	0.00613304	0.00234642	0.00263413	0.0373457	0.0136711	0.0582087	0.0696544	0.01336	0.123037	0.0143154	0.056688	0.00645063	0.208004	0.00108515	0.000288441	0.000863707	0.000898236	0.00255854	0.0100116	0.00643461	0.00743852	0.00601512	0.00452418	0.0206746	0.0171859	0.868217	0.10881	0.081913	0.00994884	0.129705
PromE(800)-GAL4	CG14688	CG14688	39840/GD	F	5	0.0241043	0.0383058	0.0291403	0.0163375	0.0251099	0.0636492	0.0197855	0.0061606	0.00338065	0.411037	0.00303074	0.00330306	0.00247956	0.00568862	0.00959121	0.00376311	0.00417409	0.0503159	0.0210426	0.0939832	0.084843	0.0207748	0.193675	0.0176496	0.0880222	0.00955032	0.273526	0.00129062	0.000383891	0.00127953	0.00113024	0.00407881	0.0157722	0.00832993	0.0115972	0.00862349	0.00611906	0.0257287	0.0245158	1.22852	0.150961	0.115855	0.0130704	0.175829
PromE(800)-GAL4	CG8814	CG8814	2606/GD	F	1	0.0172849	0.035308	0.025091	0.02185	0.0198904	0.0524275	0.0175989	0.00421614	0.00198032	0.338364	0.00283346	0.00351623	0.00306939	0.00523762	0.00946928	0.00383553	0.00467508	0.0521009	0.0208515	0.0657837	0.112509	0.0183118	0.150564	0.018922	0.0826581	0.00983688	0.256892	0.00155405	0	0.00125295	0.000831601	0.00356073	0.00959174	0.0115928	0.0101281	0.00826777	0.00652914	0.0279583	0.0203675	0.998278	0.14973	0.145839	0.0152022	0.190997
PromE(800)-GAL4	CG8814	CG8814	2606/GD	F	2	0.00880066	0.0175107	0.014459	0.012272	0.0104397	0.0286389	0.0101088	0.00260647	0.00125825	0.206173	0.00173142	0.00214655	0.00180423	0.00354835	0.00555749	0.00206841	0.00276582	0.0296173	0.0148991	0.0496388	0.0696554	0.0106981	0.109754	0.0110891	0.0482586	0.006639	0.172184	0.00118395	0.000353498	0.00114942	0.000986873	0.00279602	0.00929108	0.00690708	0.00838202	0.00620854	0.00418862	0.0186169	0.0155391	0.814493	0.093214	0.0782492	0.00573901	0.120253
PromE(800)-GAL4	CG8814	CG8814	2606/GD	F	3	0.0133159	0.0282963	0.0206636	0.0171735	0.0182015	0.0467296	0.0138973	0.00378164	0.0015845	0.292725	0.00270841	0.00370524	0.00222081	0.00557697	0.0105288	0.00365351	0.00446081	0.0472537	0.024454	0.0713138	0.0932837	0.020565	0.188054	0.0149555	0.0857556	0.0102632	0.238372	0.00172803	0.000459738	0.00159172	0.00137467	0.00483943	0.0139737	0.0096535	0.0125511	0.00977653	0.00772698	0.0306004	0.0248775	1.14396	0.149454	0.139636	0.0118148	0.191346
PromE(800)-GAL4	CG8814	CG8814	2606/GD	F	4	0.0134255	0.0263587	0.0205028	0.0162959	0.0162718	0.0420434	0.015006	0.0033846	0.00191416	0.299362	0.00247475	0.00276569	0.00212893	0.00479558	0.00818436	0.00306369	0.00365305	0.0445279	0.0215964	0.0698948	0.0978598	0.0179602	0.163829	0.0166954	0.0752784	0.00950996	0.260029	0.00185511	0.000429028	0.00135344	0.00119426	0.00365782	0.0145904	0.00948436	0.00967342	0.00829807	0.00611906	0.0268187	0.0238026	1.15589	0.132126	0.124063	0.00925054	0.171418
PromE(800)-GAL4	CG8814	CG8814	2606/GD	F	5	0.0149512	0.0332784	0.0161552	0.0100677	0.0158543	0.0402513	0.0141377	0.00409839	0.00262206	0.318559	0.0027999	0.00261555	0.00138036	0.00433464	0.00886002	0.00286323	0.00366202	0.049893	0.0149499	0.0575812	0.0455375	0.0149399	0.146284	0.0133883	0.061941	0.00774952	0.231122	0.00111587	0.000453606	0.00138726	0.00127468	0.0034492	0.0104858	0.00560478	0.00793955	0.00732832	0.00599988	0.031153	0.0178775	0.819876	0.117999	0.0880037	0.0102293	0.19369
[truncated: 14 more columns]

## Sheet: F
Line	Allele	Sex	Sample	n-C21 (1)	n-C22 (4)	7,11-C23:2 (5)	2-Me-C22 (6)	9-C23:1 (8)	7-C23:1 (9)	6-C23:1 (10)	5-C23:1 (11)	x-C23:1 (12)	n-C23 (13)	11-/ 9-Me-C23 (14)	7,11-C24:2 (15)	x,y-C24:2 (16)	3-Me-C23/ 9-C24:1 (17)	6-C24:1 (19)	NI (20)	5-C24:1 (21)	n-C24 (22)	9,13-C25:2 (23)	7,11-C25:2 (24)	2-Me-C24 (25)	6,10-C25:2 (26)	9-C25:1/ 5,9-C25:2 (27)	8-C25:1 (28)	7-C25:1 (29)	5-C25:1 (31)	n-C25 (32)	NI (33)	NI (34)	13-/11-Me-C25 (35)	5-Me-C25 (36)	8,12-C26:2 (37)	7,11-C26:2 (38)	2-Me-C25 (39)	6,10-C26:2 (40)	3-Me-C25/ 9-C26:1 (41)	7-C26:1 (42)	n-C26 (44)	9,13-C27:2 (45)	7,11-C27:2 (46a)	2-Me-C26 (46b)	5,9-C27:2/ 9-C27:1 (47)	7-C27:1 (48)	5-C27:1 (49)	n-C27 (50)	8,12-C28:2 (51)
w1118	Control	F	1	0.00678049	0.0143911	0.0108781	0.00847596	0.00982426	0.0660821	0.00483836	0.00262424	0.000560867	0.118347	0.0012647	0.00204214	0.000952411	0.00296378	0.0105005	0.00283676	0.00527093	0.0271347	0.0104605	0.0331635	0.0548872	0.0161189	0.158515	0.00250962	0.120238	0.00667449	0.121118	0.00161636	0.000179136	0.000471264	0.00101288	0.00229614	0.00743861	0.00858855	0.00379841	0.00909522	0.0132811	0.0201938	0.0141059	0.756441	0.109538	0.172168	0.245487	0.00966521	0.0817742	0.0124886
w1118	Control	F	2	0.0059967	0.0111845	0.0119432	0.0117498	0.0101373	0.0717954	0.00500922	0.00342782	0.000512414	0.100615	0.00140357	0.00206256	0.00133706	0.00308289	0.0112372	0.00311531	0.00586692	0.0212242	0.0107921	0.0365338	0.0706731	0.0146216	0.161967	0.00238141	0.132426	0.00829222	0.10542	0.00191977	0	0.000687025	0.00101633	0.0024365	0.00902283	0.00996352	0.00452494	0.00944051	0.014887	0.0161431	0.0150372	0.869356	0.124937	0.180657	0.268948	0.0119319	0.0728797	0.0135037
w1118	Control	F	3	0.00520125	0.0106781	0.00828197	0.00962093	0.00689424	0.0519751	0.00423328	0.00229764	0.000467887	0.0954825	0.00110853	0.00149204	0.00116932	0.0022991	0.00868572	0.00234469	0.00489339	0.0225897	0.00752115	0.025731	0.0624241	0.0107682	0.124201	0.00188362	0.100548	0.00654781	0.110097	0.00157984	0.000203601	0.000398824	0.000804781	0.00183711	0.0071577	0.0089209	0.00409749	0.00806335	0.0130897	0.0185283	0.0120034	0.686443	0.160087	0.152704	0.230696	0.0104247	0.0740861	0.0117605
w1118	Control	F	4	0.00668856	0.0141161	0.0084014	0.00888845	0.0076422	0.0594334	0.00412655	0.0023242	0.000538524	0.114229	0.00102979	0.00143096	0.00102293	0.0024137	0.00888658	0.00256419	0.00487089	0.0271138	0.00738389	0.0262745	0.058933	0.0134177	0.126913	0.00148076	0.109615	0.00587889	0.115386	0.00141651	0.000180815	0.000622601	0.00082003	0.00160093	0.00601193	0.00871121	0.00318792	0.0079054	0.011941	0.0193221	0.00992846	0.621295	0.15102	0.147025	0.235031	0.00869386	0.0694778	0.00970805
w1118	Control	F	5	0.00561696	0.013136	0.00802573	0.00937112	0.00703474	0.0518756	0.00393874	0.0021581	0.000484915	0.101558	0.00102421	0.00171251	0.00137604	0.00250366	0.00936981	0.00255733	0.005682	0.0265567	0.00759283	0.0258922	0.0659025	0.0117344	0.12596	0.00225074	0.103717	0.00638835	0.108477	0.00142269	0	0.000402393	0.00082952	0.00199621	0.00613429	0.0103695	0.0045341	0.00799302	0.0124102	0.0192336	0.0107175	0.65741	0.161984	0.132497	0.211951	0.00833771	0.0657688	0.0115
CG10097	e00276	F	1	0.00463416	0.00892924	0.00497458	0.00673489	0.0061439	0.0588024	0.00349625	0.00331049	0.000645075	0.115799	0.00103143	0.000521396	0.000954758	0.0018695	0.0048803	0.00225514	0.00240369	0.0174424	0.00632617	0.0223185	0.0429776	0.0146932	0.099486	0.00187753	0.093707	0.00869904	0.142823	0.00121142	0.000197586	0.000464241	0.000697677	0.000761199	0.00522355	0.00800368	0.00171303	0.00555151	0.00567116	0.0168073	0.00956635	0.548517	0.144279	0.117074	0.204199	0.00855503	0.104926	0.00520832
CG10097	e00276	F	2	0.00481154	0.00935012	0.00475719	0.00685512	0.00513511	0.0529711	0.00337806	0.00330626	0.00059322	0.123847	0.00130764	0.000468837	0.000986903	0.00199439	0.0048441	0.00224634	0.0020597	0.0194592	0.00581658	0.0183408	0.042898	0.0117811	0.106281	0.00262851	0.0939966	0.010659	0.147628	0.00129657	0.000222689	0.000571185	0.000749398	0.000595814	0.00524721	0.00733211	0.0011184	0.00591011	0.00578779	0.0177029	0.008405	0.434616	0.210303	0.12182	0.230899	0.0104316	0.11121	0.00452183
CG10097	e00276	F	3	0.00493646	0.00917981	0.00577628	0.00610569	0.00659863	0.0559008	0.00365534	0.00320234	0.000609268	0.121899	0.00121876	0.000588011	0.00107675	0.00217933	0.00468995	0.00205834	0.0021126	0.0197092	0.00679338	0.0215388	0.0400447	0.0122132	0.105392	0.00263173	0.0867562	0.00843301	0.158682	0.0011144	0.000220948	0.000448693	0.000714613	0.000736728	0.00500308	0.00678774	0.00143276	0.00585548	0.00613546	0.0198682	0.0101362	0.510573	0.144278	0.134564	0.203628	0.0097742	0.11634	0.00533615
CG10097	e00276	F	4	0.00543108	0.00902718	0.00576608	0.00731878	0.00834369	0.0682265	0.00364443	0.00392038	0.00066045	0.126818	0.00171805	0.000464297	0.00132512	0.00265324	0.0047681	0.00244444	0.00207022	0.0175602	0.00691151	0.0222519	0.0492582	0.0156605	0.116397	0.00159608	0.104596	0.00935721	0.156979	0.00146853	0.000255383	0.000663496	0.000923667	0.000577578	0.00431703	0.00786872	0.00100221	0.00602024	0.00484567	0.01565	0.00975258	0.469176	0.195827	0.12841	0.22209	0.00920614	0.104755	0.0037997
CG10097	e00276	F	5	0.00623083	0.0120175	0.00731213	0.0069771	0.00854219	0.0896094	0.00434993	0.00509821	0.000666191	0.13857	0.00146047	0.00077937	0.000986361	0.00267807	0.00727913	0.00330014	0.0033629	0.0204191	0.00807942	0.032391	0.0427682	0.0195398	0.134176	0.00160451	0.1341	0.00849078	0.132725	0.00111554	0.000196809	0.000535643	0.000677302	0.000981973	0.00601952	0.00640567	0.00194485	0.0055444	0.0061049	0.0163452	0.00906047	0.522247	0.135743	0.110765	0.198722	0.00851969	0.0974535	0.00495455
[truncated: 14 more columns]

## Sheet: G
Driver	UAS-RNAi	CG Number	Transformant ID	Sex	Sample	n-C21 (1)	x-C22:1 (2)	x-C22:1 (3)	n-C22 (4)	2-Me-C22 (6)	NI (7)	9-C23:1 (8)	7-C23:1 (9)	6-C23:1 (10)	5-C23:1 (11)	n-C23 (13)	x,y-C24:2 (16)	3-Me-C23 (17)	7-C24:1 (18)	6-C24:1 (19)	5-C24:1 (21)	n-C24 (22)	2-Me-C24 (25)	6,10-C25:2 (26)	9-C25:1 (27)	7-C25:1 (29)	5-C25:1 (31)	n-C25 (32)	2-Me-C25 (39)	3-Me-C25 (41)	7-C26:1 (42)	6-C26:1/ i (43)	n-C26 (44)	2-Me-C26 (46)	9-C27:1 (47)	7-C27:1 (48)	n-C27 (50)	2-Me-C27 (52)	NI (54)	n-C28 (55)	2-Me-C28 (57)	7-C29:1 (59)	n-C29 (60)	2-Me-C29 (61)	2-Me-C30 (62)	n-C31 (64)	Total CHCs (ug/fly)
PromE(800)-GAL4	app	CG42318	106488/KK	M	1	0.0276184	0.00523777	0.000814841	0.0363246	0.00245768	0.000954143	0.0345875	0.41098	0.00453639	0.0345245	0.19836	0.000375045	0.00205389	0.0167347	0.00549491	0.00930797	0.00906449	0.00926295	0.00475982	0.0278148	0.105688	0.00221333	0.0325552	0.00089921	0.000699523	0.0005388	0.000405227	0.00368644	0.045526	0.000987131	0.00467449	0.0267491	0.00162687	0.00148139	0.00296347	0.0721571	0.00155977	0.0127549	0.00306068	0.0150896	0.001791	1.17865
PromE(800)-GAL4	app	CG42318	106488/KK	M	2	0.032792	0.00377016	0.000545607	0.0446441	0.00265655	0.000720606	0.0277919	0.289351	0.00278977	0.024718	0.265558	0.0004239	0.00192536	0.0115944	0.0039446	0.005882	0.0121065	0.0149014	0.00347007	0.0213945	0.0789382	0.00201071	0.0436346	0.00116602	0.00108792	0.000401304	0.00030179	0.00491039	0.0636975	0.00135827	0.00404651	0.0361887	0.00212279	0.00258045	0.00392366	0.0932183	0.00172461	0.0167593	0.00424252	0.0182717	0.00207176	1.15364
PromE(800)-GAL4	app	CG42318	106488/KK	M	3	0.0339166	0.00442083	0.000728552	0.0476704	0.00399567	0.000882061	0.0342624	0.328708	0.00284924	0.0279879	0.257037	0.000595416	0.00253276	0.0138737	0.00445783	0.00718919	0.0118725	0.0212286	0.00367947	0.0232493	0.0892516	0.00226509	0.0399983	0.00160754	0.0017106	0.000463766	0.000333683	0.00447174	0.0723221	0.00123609	0.00434962	0.0307475	0.00226471	0.00362869	0.00329425	0.0916782	0.00191291	0.0135975	0.00391392	0.0169452	0.00181236	1.21894
PromE(800)-GAL4	app	CG42318	106488/KK	M	5	0.0275972	0.00305037	0.000450742	0.0422786	0.00242676	0.000678278	0.0245998	0.256645	0.00253021	0.0221014	0.245447	0.000586379	0.00178617	0.011146	0.00372298	0.00566628	0.0111449	0.0136972	0.00283148	0.0195407	0.0765726	0.00198555	0.0394382	0.000999137	0.00102264	0.000449568	0.000305748	0.00443014	0.056919	0.00104274	0.0038914	0.0328311	0.00205047	0.00248204	0.00347974	0.0894498	0.00181696	0.0153372	0.00392938	0.017768	0.00186828	1.056
PromE(800)-GAL4	CG13091	CG13091	100943/KK	M	1	0.0329651	0.00591366	0.000408378	0.0396315	0.00488609	0.00082025	0.0521472	0.440681	0.004461	0.0351251	0.211786	0.000375667	0.00151122	0.0221284	0.0096495	0.0136842	0.00962267	0.00711749	0.00632374	0.0330801	0.234896	0.0128004	0.0258286	0.00192078	0.000587137	0.00194956	0.00151818	0.00350382	0.0978083	0.00437118	0.0407218	0.0204903	0.00349566	0.000471443	0.00321079	0.131121	0.00335948	0.0100526	0.0034506	0.0176643	0.00159391	1.5542
PromE(800)-GAL4	CG13091	CG13091	100943/KK	M	2	0.0284739	0.00308224	0.000214915	0.0364975	0.00432878	0.000415923	0.029904	0.224914	0.00252566	0.0183899	0.208157	0.000314285	0.00152349	0.0114406	0.0051154	0.00697276	0.00915334	0.00837674	0.00303671	0.0184651	0.126035	0.00835368	0.0251114	0.00214289	0.000624685	0.000943205	0.000910532	0.00350373	0.0993181	0.00287308	0.0264982	0.0215847	0.00355512	0.00239028	0.00309116	0.133989	0.00257885	0.0102913	0.00404161	0.0178094	0.00170272	1.11893
PromE(800)-GAL4	CG13091	CG13091	100943/KK	M	3	0.0304512	0.0031951	0.000242143	0.0419389	0.00404487	0.000397928	0.0314369	0.239608	0.00279717	0.0202386	0.232837	0.000355968	0.00166244	0.0129216	0.00558959	0.00799352	0.011078	0.00846537	0.00310235	0.0205243	0.141141	0.00979051	0.0298313	0.00205447	0.000748374	0.00119334	0.00114414	0.00484501	0.100484	0.00339137	0.0340697	0.0289044	0.00369547	0.00364485	0.00488076	0.14201	0.00425378	0.0159124	0.00515597	0.0227351	0.00218905	1.2414
PromE(800)-GAL4	CG13091	CG13091	100943/KK	M	4	0.0307422	0.00309081	0.000234861	0.0435509	0.00369876	0.00037072	0.0303921	0.230474	0.00244377	0.0182832	0.224128	0.000268022	0.00150213	0.0124295	0.00494557	0.00758029	0.0110873	0.00731051	0.00274225	0.0173746	0.119888	0.00779455	0.0279492	0.0018341	0.00060456	0.000951482	0.000876356	0.00439058	0.0986687	0.00269125	0.0266023	0.0262489	0.00390107	0.00321158	0.00428946	0.152602	0.00348107	0.0142549	0.00516518	0.023085	0.00218511	1.18357
PromE(800)-GAL4	CG13091	CG13091	100943/KK	M	5	0.0237153	0.00222629	0	0.035645	0.00360714	0.00028141	0.0225825	0.173325	0.00211693	0.0139664	0.192917	0.000348434	0.00126147	0.00931339	0.00400768	0.00643604	0.00989423	0.00852939	0.00214589	0.013766	0.0971217	0.00659693	0.0246555	0.0019972	0.000667254	0.000719159	0.000786308	0.00404359	0.10055	0.00198365	0.021923	0.0227094	0.00364985	0.00260942	0.00384964	0.14079	0.00311824	0.0118003	0.00486162	0.0211114	0.00202879	1.00386
PromE(800)-GAL4	CG16979	CG16979	105386/KK	M	1	0.0337304	0.00769897	0.0014459	0.0420971	0.00638541	0.00150876	0.0527676	0.647444	0.0047667	0.0421761	0.221119	0.00105822	0.00310229	0.0241857	0.00712639	0.0120412	0.00928779	0.0285616	0.00507592	0.03441	0.130362	0.00212491	0.0310874	0.00161913	0.00119008	0.000749989	0.000304578	0.00301591	0.0944191	0.0011908	0.0041416	0.0179173	0.00242213	0.0020608	0.00169299	0.0913523	0.00102686	0.00589843	0.00235378	0.0121463	0.00126151	1.59451
PromE(800)-GAL4	CG16979	CG16979	105386/KK	M	2	0.0362798	0.00519395	0.00100335	0.0465101	0.00553717	0.00111401	0.0410902	0.414022	0.00393627	0.0285041	0.241301	0.00115351	0.00235785	0.0164302	0.00464587	0.00806522	0.0105092	0.0377916	0.00301731	0.0233431	0.083948	0.0017167	0.0340753	0.00198369	0.00125089	0.000501586	0.000273312	0.0034856	0.114479	0.000784008	0.00249305	0.0196542	0.002713	0.00275228	0.00195665	0.103042	0.00116304	0.00667877	0.00252232	0.0136282	0.00154883	1.33246
PromE(800)-GAL4	CG16979	CG16979	105386/KK	M	3	0.0403487	0.00483982	0.000878412	0.0527579	0.00578399	0.000919458	0.0361884	0.365114	0.00404328	0.0274617	0.280632	0.00141275	0.00253481	0.0134569	0.00433498	0.00749621	0.0122863	0.0376011	0.00266421	0.0195725	0.0731864	0.00145581	0.0390008	0.00178992	0.00139187	0.000488874	0.000583007	0.00406397	0.105001	0.00062319	0.00232741	0.0242622	0.00264191	0.00254244	0.00250373	0.100539	0.00103353	0.0089823	0.00320005	0.0135856	0.00162152	1.31115
PromE(800)-GAL4	CG16979	CG16979	105386/KK	M	4	0.0311628	0.00393357	0.000672617	0.0435911	0.00445667	0.00079428	0.0312832	0.320123	0.00281871	0.0230889	0.243456	0.000812495	0.00188263	0.0122107	0.00382218	0.00628186	0.0108061	0.0319458	0.00250149	0.0191164	0.0737841	0.00159509	0.0366074	0.00169604	0.00129151	0.000404104	0.000281244	0.00381848	0.101034	0.000940766	0.00253218	0.0250238	0.00263998	0.00242082	0.00243966	0.106233	0.00125543	0.00981997	0.00316953	0.0157369	0.00175744	1.18924
PromE(800)-GAL4	CG16979	CG16979	105386/KK	M	5	0.0350223	0.0044562	0.000758185	0.0497374	0.00452288	0.00100253	0.0372607	0.374261	0.00327172	0.0264698	0.270473	0.00104066	0.00218881	0.0146915	0.00467069	0.00878421	0.0121506	0.034612	0.00312251	0.0223215	0.0884054	0.00154886	0.0401785	0.00170702	0.00136141	0.000373219	0.000258314	0.00416515	0.1075	0.000548226	0.00317769	0.0265623	0.00270306	0.00299852	0.00257349	0.107685	0.00186063	0.0100354	0.00339253	0.0154733	0.00179118	1.33554
PromE(800)-GAL4	CG30008	CG30008	102817/KK	M	1	0.0336149	0.00335379	0.00406528	0.0358609	0.00730628	0.000458276	0.0121566	0.19408	0.00161405	0.00681202	0.040706	0.00162647	0.0031662	0.00658915	0.000913406	0.00266067	0.00556403	0.0285231	0.000707094	0.00588758	0.00935776	0.000210222	0.00843697	0.00257791	0.00100545	0.00017039	0.000190519	0.00246655	0.0717863	0.000707959	0.00130094	0.00753708	0.00394017	0.00135476	0.00238563	0.100279	0.00109466	0.00599417	0.0011819	0.0215177	0.00172598	0.641127
PromE(800)-GAL4	CG30008	CG30008	102817/KK	M	2	0.0412122	0.00232896	0.00263462	0.0467318	0.00727985	0.000255225	0.00888128	0.122133	0.000814471	0.00453001	0.0525363	0.00180767	0.00222219	0.00421874	0.000592557	0.00120261	0.00723639	0.0374841	0.000652279	0.00438242	0.00625365	0	0.0108612	0.00341845	0.000990522	0	0.000200181	0.00314236	0.0900933	0.00025372	0.000818114	0.00959571	0.00494847	0.00172894	0.00303062	0.12064	0.000985406	0.0075071	0.00143471	0.0248373	0.00193812	0.641814
PromE(800)-GAL4	CG30008	CG30008	102817/KK	M	3	0.0291601	0.00152497	0.0018416	0.0351324	0.00588168	0	0.00602857	0.0857004	0.000568148	0.00318929	0.0396423	0.00149893	0.00163668	0.0030107	0.000383761	0.000836824	0.00570509	0.0336281	0.00048995	0.00306926	0.00451822	0	0.00850272	0.00312577	0.00074132	0	0	0.00249501	0.0851154	0.000368673	0.000634551	0.00795551	0.00472894	0.00113094	0.00285595	0.116773	0.000909255	0.00695969	0.00124028	0.0238357	0.00200706	0.532827
PromE(800)-GAL4	CG30008	CG30008	102817/KK	M	4	0.025832	0.0013645	0.00161391	0.0324442	0.00476404	0	0.00591579	0.0782601	0.000431398	0.00286305	0.0381894	0.00132378	0.00152302	0.00287772	0.00033715	0.000814626	0.00568681	0.030668	0.000438841	0.00297101	0.00444624	0	0.00866235	0.00296784	0.000652864	0	0	0.00262004	0.080428	0	0.00058334	0.00816744	0.00460127	0.00110557	0.00292342	0.114795	0.000828955	0.00705931	0.00116411	0.0247743	0.00189627	0.505996
PromE(800)-GAL4	CG30008	CG30008	102817/KK	M	5	0.0180905	0.000968475	0.0012199	0.0249918	0.00690758	0	0.0044471	0.0586292	0.000278335	0.00191098	0.0264747	0.00174619	0.00129369	0.0022233	0.000236568	0.000573119	0.00414044	0.0394909	0.000240266	0.0021296	0.00341345	0	0.00584543	0.00354354	0.000805943	0	0	0.00179966	0.0945027	0	0.000530566	0.00538807	0.00482866	0.000663724	0.00191141	0.114226	0.000710758	0.00495782	0.000908043	0.0204879	0.00160571	0.462122
PromE(800)-GAL4	CG8680	CG8680	102017/KK	M	1	0.126415	0.0204742	0.00417897	0.128239	0.0257707	0.00423577	0.150015	1.38076	0.00980295	0.123639	0.668557	0.00500103	0.010859	0.0518706	0.0171935	0.0264239	0.0233289	0.0941503	0.024312	0.0967842	0.27453	0.0058684	0.0757214	0.00556281	0.00470792	0.00157233	0.00075058	0.00629276	0.215601	0.0055904	0.010805	0.0362417	0.0062567	0.00574453	0.00290636	0.185163	0.00776254	0.0119178	0.00594117	0.0223009	0.0020757	3.88668
PromE(800)-GAL4	CG8680	CG8680	102017/KK	M	2	0.0963213	0.0115085	0.00227991	0.112738	0.0166859	0.00286359	0.0862266	0.782391	0.00700326	0.0708961	0.634542	0.00304889	0.00635386	0.0301057	0.0101826	0.0159243	0.0251953	0.0797296	0.012366	0.05698	0.171364	0.00453211	0.0860153	0.00476878	0.00381307	0.000958652	0.000536295	0.00808243	0.202795	0.00335482	0.00791152	0.0485326	0.00624901	0.00710381	0.00415154	0.196522	0.0069849	0.0169461	0.00657339	0.0258246	0.0025722	2.87981
PromE(800)-GAL4	CG8680	CG8680	102017/KK	M	3	0.0877255	0.0132694	0.00296687	0.095403	0.0200892	0.00297588	0.0987491	0.886707	0.00745019	0.0794674	0.48514	0.00353529	0.00716066	0.0346833	0.010654	0.017831	0.0180091	0.0887957	0.0115246	0.0621324	0.177467	0.00426035	0.0569459	0.0050548	0.0036334	0.000892551	0.00206209	0.00491433	0.189668	0.00361599	0.00751564	0.0274336	0.00510541	0.00486355	0.00236981	0.151035	0.00620282	0.00957315	0.0046829	0.0194796	0.00197477	2.72385
PromE(800)-GAL4	CG8680	CG8680	102017/KK	M	4	0.114259	0.0156449	0.00290233	0.132005	0.0225342	0.00422988	0.121829	1.06668	0.00590949	0.0933481	0.725136	0.00488996	0.0093125	0.0412886	0.0142774	0.0205695	0.0275426	0.103267	0.019235	0.0855377	0.239202	0.00570481	0.0882676	0.00620734	0.00411871	0.00110878	0.000621629	0.00772852	0.233945	0.00485952	0.00996533	0.0437251	0.0066197	0.00627607	0.003512	0.196342	0.00829781	0.013949	0.00582627	0.0236319	0.00223324	3.54367
PromE(800)-GAL4	CG8680	CG8680	102017/KK	M	5	0.0636448	0.00776042	0.00159879	0.0722059	0.0126811	0.00177652	0.0607611	0.550861	0.0045623	0.0496812	0.406755	0.00263625	0.00488331	0.0211743	0.00683127	0.0107436	0.0146621	0.0620608	0.00685124	0.0385744	0.113737	0.00288493	0.051268	0.00357775	0.00276366	0.000570996	0.000356541	0.00432624	0.150383	0.00202469	0.00484918	0.0264281	0.00414839	0.00392704	0.00208097	0.129403	0.00429115	0.00891804	0.00387047	0.0159264	0.0016626	1.93865
PromE(800)-GAL4	Desi	CG14686	105692/KK	M	1	0.0283421	0.00584811	0.000812583	0.036108	0.00316123	0.00099665	0.0415421	0.474196	0.00454879	0.0381494	0.230603	0.000531709	0.0023919	0.0177701	0.00617481	0.00933826	0.0100573	0.0155765	0.00505221	0.0318734	0.122367	0.00242566	0.0372488	0.00127411	0.00096286	0.000750833	0.00033507	0.00383506	0.0707703	0.00152165	0.00482586	0.0272677	0.00207201	0.00194979	0.00291745	0.0870465	0.00148268	0.0112537	0.00308697	0.0141016	0.00168155	1.36251
PromE(800)-GAL4	Desi	CG14686	105692/KK	M	2	0.0355971	0.00463385	0.000670589	0.046199	0.00382789	0.00078723	0.0362797	0.357685	0.00366184	0.0302349	0.276469	0.00110512	0.00256689	0.01424	0.00483234	0.00679874	0.0120575	0.0212991	0.00338584	0.026675	0.0953248	0.00229701	0.0419865	0.00173621	0.00144477	0.000542944	0.000311215	0.00429882	0.0887386	0.00162442	0.00374252	0.0289314	0.00251885	0.00300952	0.00288975	0.0983145	0.00155524	0.010718	0.00390226	0.0150534	0.0016188	1.29957
PromE(800)-GAL4	Desi	CG14686	105692/KK	M	3	0.0362428	0.00465762	0.000648502	0.0491813	0.0036094	0.000829991	0.0365123	0.351306	0.00332009	0.0297886	0.310455	0.000636194	0.0021712	0.0135966	0.00473207	0.00665254	0.0134167	0.0218253	0.0032966	0.0253121	0.0947657	0.00233588	0.0482158	0.0016663	0.00115986	0.000507211	0.000285055	0.00493257	0.0880721	0.0014811	0.00378287	0.0344701	0.00277166	0.00244671	0.00350124	0.11144	0.00153626	0.0134563	0.00367106	0.0171438	0.0019296	1.35824
PromE(800)-GAL4	Desi	CG14686	105692/KK	M	4	0.0286407	0.00331147	0.000462469	0.0396829	0.00279735	0.000539433	0.0269364	0.264223	0.00248726	0.0224473	0.250167	0.000500429	0.00166641	0.0105629	0.00356595	0.00510201	0.0110665	0.0189034	0.00240406	0.0194752	0.0728329	0.00189846	0.0392703	0.00140225	0.00119158	0.000441348	0.000258186	0.0040988	0.0795968	0.00108703	0.00286237	0.0282979	0.0023576	0.00366914	0.00292842	0.0960956	0.00131793	0.0109612	0.00327992	0.0146118	0.00171494	1.08512
PromE(800)-GAL4	Desi	CG14686	105692/KK	M	5	0.0281354	0.00330424	0.00046246	0.0397964	0.00310367	0.000592324	0.0282193	0.265211	0.00261864	0.0224351	0.253515	0.000596996	0.00172409	0.0104685	0.00360747	0.00517899	0.0112678	0.0220508	0.00241352	0.0187157	0.0739896	0.00191224	0.0393961	0.00140122	0.00120462	0.000386251	0.000271342	0.00414529	0.0874476	0.000486328	0.00284937	0.0279952	0.00251444	0.00304569	0.00290522	0.102237	0.00124429	0.0109051	0.00327908	0.0153114	0.00285973	1.10939
PromE(800)-GAL4	KK Control	Control	60100/KK	M	1	0.0325973	0.0038732	0.000670313	0.0432381	0.00358956	0.000482014	0.0298144	0.290986	0.00221719	0.0247908	0.22997	0.000690246	0.00176953	0.0125883	0.00387982	0.00749807	0.0106337	0.0205756	0.0025687	0.0187065	0.0709319	0.00194705	0.032964	0.00125523	0.000997447	0.000398184	0.000234525	0.0036001	0.0791294	0.00112073	0.00298535	0.0222085	0.00201728	0.00251885	0.00226915	0.0773616	0.00129357	0.00780812	0.00261107	0.0102441	0.00142422	1.06646
PromE(800)-GAL4	KK Control	Control	60100/KK	M	2	0.0292894	0.00295941	0.000546092	0.0364274	0.00370086	0.000446877	0.0238296	0.218381	0.00240548	0.0204381	0.197702	0.000580272	0.00163613	0.00926676	0.00267139	0.00473861	0.00878125	0.0194766	0.00179628	0.0139713	0.0507462	0.00131296	0.028508	0.00146551	0.00113918	0.000371174	0.000211305	0.00301217	0.0724057	0.000876432	0.00213951	0.0190436	0.00187658	0.00243106	0.00188564	0.0690739	0.0010497	0.00660991	0.00271424	0.00987455	0.00108915	0.877191
PromE(800)-GAL4	KK Control	Control	60100/KK	M	3	0.028479	0.00317237	0.00053133	0.0370299	0.00342579	0.00052648	0.025617	0.247013	0.00257225	0.022605	0.210876	0.000590112	0.00154955	0.010411	0.00319464	0.00567754	0.00948027	0.020759	0.002134	0.0158969	0.0623834	0.00182316	0.0315086	0.00131695	0.00107022	0.000376633	0.00026901	0.00329594	0.077594	0.000856454	0.00261347	0.0219938	0.00207953	0.00252789	0.00217036	0.0812661	0.00125774	0.00809373	0.00265934	0.0112585	0.00122223	0.969178
PromE(800)-GAL4	KK Control	Control	60100/KK	M	4	0.0229545	0.00215026	0.000379111	0.0319691	0.00271611	0.000352654	0.0177337	0.172282	0.00175406	0.015749	0.180935	0.000505452	0.00121854	0.00751518	0.00232304	0.00432514	0.00866767	0.0177268	0.00156747	0.0121365	0.0439684	0.0012678	0.0281374	0.00111933	0.0009208	0.00023729	0.000185689	0.0031901	0.063538	0.000427787	0.00195433	0.0201174	0.00171014	0.00188874	0.00220123	0.0694938	0.00119429	0.00794265	0.00249724	0.0110528	0.00159219	0.769598
PromE(800)-GAL4	KK Control	Control	60100/KK	M	5	0.0285808	0.00336701	0.000575721	0.0371289	0.00387389	0.000557728	0.0271693	0.25527	0.00249046	0.0220482	0.209333	0.000739806	0.00162643	0.0105802	0.00328488	0.00627771	0.00927185	0.0245897	0.00207466	0.0151504	0.061055	0.00122782	0.0303196	0.00142124	0.00108155	0.000278211	0.000204901	0.0030322	0.0870337	0.000664365	0.00233141	0.0200943	0.00221369	0.00298343	0.00202086	0.0835101	0.00112349	0.00713584	0.00258837	0.0113408	0.00116619	0.986818
PromE(800)-GAL4	Lip2	CG17116	102033/KK	M	1	0.0245203	0.00597289	0.000977747	0.0275513	0.00759327	0.000907113	0.0393442	0.483574	0.00435263	0.0364418	0.179062	0.00156588	0.00260362	0.0158553	0.00569805	0.00843587	0.00696932	0.0412575	0.00314463	0.0272261	0.0984936	0.00182053	0.0237104	0.00240007	0.0012842	0.00046618	0.000252692	0.00228439	0.108197	0.000917617	0.00285259	0.0110437	0.00226038	0.00181249	0.0014103	0.0717173	0.000902139	0.00389235	0.00137232	0.00803386	0.00109291	1.26945
PromE(800)-GAL4	Lip2	CG17116	102033/KK	M	2	0.0320239	0.00578832	0.000894435	0.0403448	0.00844829	0.000916383	0.040324	0.424264	0.00412983	0.0337792	0.256678	0.00250927	0.00297466	0.0147456	0.00578778	0.0082427	0.0103407	0.0558796	0.00292704	0.0278592	0.0981377	0.00230298	0.0336332	0.00337188	0.00161601	0.000402334	0.000322808	0.00340013	0.147032	0.000908138	0.00259749	0.0161949	0.00326231	0.00333103	0.00192531	0.101892	0.00102706	0.00493127	0.0020142	0.0103669	0.00125064	1.41878
PromE(800)-GAL4	Lip2	CG17116	102033/KK	M	4	0.0238753	0.00327466	0.000513626	0.0337531	0.00632903	0.000326258	0.0243755	0.242525	0.00234965	0.0204268	0.21827	0.00167445	0.00226539	0.0089836	0.00351565	0.0051381	0.00987839	0.0529224	0.00161819	0.0167912	0.062717	0.00168441	0.0303763	0.00281585	0.00206121	0.000319928	0.000254624	0.00316972	0.133372	0.000804294	0.00176815	0.014454	0.0027237	0.00361293	0.00172036	0.0822242	0.000628276	0.00450179	0.00213224	0.00843941	0.00109884	1.03969
PromE(800)-GAL4	Lip2	CG17116	102033/KK	M	5	0.0260907	0.00316821	0.000526717	0.0394208	0.00582806	0.000473522	0.0247874	0.248885	0.00274534	0.0212485	0.234316	0.00147308	0.00236561	0.0101101	0.00351648	0.00637846	0.0112594	0.0465943	0.00166029	0.0157942	0.0626756	0.00170968	0.0324525	0.00244781	0.00210132	0.000246539	0.000225282	0.00371637	0.124665	0.000688407	0.00205896	0.0172908	0.00278706	0.00412982	0.00246195	0.0928252	0.000767975	0.00588462	0.00317814	0.0105308	0.00135007	1.08084
PromE(800)-GAL4	PHGPx	CG12013	100790/KK	M	1	0.0260109	0.00574242	0.00111554	0.0373905	0.00425639	0.000997008	0.0461717	0.480668	0.00430203	0.0354913	0.201022	0.00114273	0.00282872	0.0210778	0.00575776	0.0104984	0.00999152	0.0249042	0.0036954	0.0292325	0.107686	0.00192196	0.0296067	0.00144221	0.00107832	0.000745086	0.000306623	0.00310708	0.0840028	0.00120365	0.00352867	0.0171153	0.0020757	0.00191514	0.0021816	0.082341	0.0010772	0.00687117	0.00225842	0.0119903	0.00146215	1.31663
PromE(800)-GAL4	PHGPx	CG12013	100790/KK	M	2	0.0323568	0.00456715	0.000742627	0.04601	0.00530553	0.000725731	0.0363363	0.351224	0.00384946	0.0283937	0.266416	0.00111682	0.00246973	0.0145016	0.00464865	0.00719218	0.0122618	0.0353814	0.00238495	0.0230823	0.0868288	0.00216179	0.038638	0.00215054	0.00132326	0.000535807	0.000335668	0.0038614	0.1136	0.0010204	0.00299102	0.0219588	0.00277739	0.00256896	0.00252383	0.0976117	0.000923071	0.00793698	0.00252873	0.0124287	0.00140044	1.28507
PromE(800)-GAL4	PHGPx	CG12013	100790/KK	M	3	0.0288163	0.00380222	0.000670337	0.0445124	0.00335085	0.000433387	0.0321374	0.304793	0.00217963	0.0224086	0.24897	0.000818672	0.00199688	0.0138837	0.00409183	0.00723814	0.0123384	0.0289256	0.00213963	0.0203161	0.0753138	0.00177462	0.0376581	0.00170743	0.001305	0.000420427	0.000273606	0.00403779	0.0976625	0.00103947	0.00273782	0.0245829	0.00268424	0.00283943	0.00289291	0.105899	0.00113	0.00959038	0.00319373	0.0138047	0.00162574	1.176
PromE(800)-GAL4	PHGPx	CG12013	100790/KK	M	4	0.0274628	0.00375635	0.00072341	0.0460091	0.00317312	0.000683723	0.0310815	0.289256	0.00256693	0.0227303	0.243382	0.000851693	0.00189953	0.0137287	0.0038942	0.00725215	0.0125035	0.0251275	0.00216483	0.0195399	0.0755968	0.00170734	0.0373852	0.00148747	0.00108712	0.000403434	0.000219747	0.00430245	0.0837563	0.000966967	0.00282678	0.0263571	0.00239441	0.00244523	0.00302213	0.0984531	0.00109455	0.0107577	0.00343585	0.0146571	0.00182896	1.13197
PromE(800)-GAL4	PHGPx	CG12013	100790/KK	M	5	0.0340124	0.00408155	0.000614524	0.0538213	0.00380266	0.000862017	0.0367392	0.325041	0.00356488	0.0273514	0.309428	0.000885868	0.00224622	0.0151568	0.0050249	0.00874681	0.0152052	0.0309457	0.00318948	0.0248611	0.101514	0.0026112	0.0468183	0.00181262	0.00139903	0.000462624	0.000383904	0.00501957	0.10058	0.00104997	0.00413533	0.0318224	0.0029182	0.00314635	0.0034966	0.116756	0.00161266	0.0130066	0.00383058	0.0176813	0.00197288	1.36761

## Sheet: H
Driver	UAS-RNAi	CG Number	Transformant ID	Sex	Sample	n-C21 (1)	x-C22:1 (2)	x-C22:1 (3)	n-C22 (4)	2-Me-C22 (6)	NI (7)	9-C23:1 (8)	7-C23:1 (9)	6-C23:1 (10)	5-C23:1 (11)	n-C23 (13)	x,y-C24:2 (16)	3-Me-C23 (17)	7-C24:1 (18)	6-C24:1 (19)	5-C24:1 (21)	n-C24 (22)	2-Me-C24 (25)	6,10-C25:2 (26)	9-C25:1 (27)	7-C25:1 (29)	5-C25:1 (31)	n-C25 (32)	2-Me-C25 (39)	3-Me-C25 (41)	7-C26:1 (42)	6-C26:1/ i (43)	n-C26 (44)	2-Me-C26 (46)	9-C27:1 (47)	7-C27:1 (48)	n-C27 (50)	2-Me-C27 (52)	NI (54)	n-C28 (55)	2-Me-C28 (57)	7-C29:1 (59)	n-C29 (60)	2-Me-C29 (61)	2-Me-C30 (62)	n-C31 (64)	Total CHCs (ug/fly)
PromE(800)-GAL4	Cyp9f2	CG11466	106779/KK	M	1	0.0687289	0.0143135	0.00364107	0.0737369	0.0107286	0.00435143	0.102168	0.947191	0.0407562	0.0716412	0.42952	0.00442301	0.0310378	0.0126538	0.0180127	0.00122657	0.0177506	0.0548003	0.0140733	0.0537279	0.190081	0.00649537	0.0622639	0.00211434	0.00091067	0.00075172	0.000437068	0.00477365	0.149584	0.00372888	0.00849851	0.0305721	0.00304331	0.0019882	0.00314496	0.104495	0.00225673	0.0107523	0.00227448	0.0130669	0.0017248	2.57831
PromE(800)-GAL4	Cyp9f2	CG11466	106779/KK	M	2	0.0523129	0.0104456	0.00292974	0.0560108	0.00888377	0.00290608	0.0768661	0.728241	0.0287263	0.0566761	0.330462	0.00357024	0.0236858	0.0094989	0.0157554	0.00146066	0.0135922	0.0449018	0.0102789	0.0427841	0.149189	0.0051174	0.0497151	0.00168341	0.000891863	0.000591728	0.000368892	0.00402602	0.131696	0.00333948	0.00765437	0.0278539	0.00269361	0.0017631	0.00309259	0.101753	0.0021362	0.0106357	0.00241281	0.0141676	0.00163217	2.04391
PromE(800)-GAL4	Cyp9f2	CG11466	106779/KK	M	3	0.0426206	0.00965616	0.00236105	0.047073	0.00742552	0.00288325	0.06944	0.64869	0.0249631	0.0476852	0.279816	0.00300263	0.0220672	0.0084927	0.0127291	0.000678042	0.0121879	0.0407838	0.00976714	0.0370987	0.133139	0.00455086	0.0429872	0.0016663	0.000641236	0.000563594	0.000294879	0.00351561	0.121058	0.00270605	0.00632298	0.0231728	0.00268191	0.00161292	0.00263242	0.0978433	0.00177094	0.00911706	0.00188537	0.0130152	0.00157533	1.80321
PromE(800)-GAL4	Cyp9f2	CG11466	106779/KK	M	4	0.0420682	0.00924282	0.00232666	0.0488637	0.00585821	0.00214478	0.0622216	0.615436	0.0311944	0.0507515	0.286869	0.00289241	0.0207117	0.00858666	0.0134277	0.000767002	0.0131977	0.0287121	0.00803396	0.0352324	0.13672	0.00504787	0.048623	0.00127388	0.000786498	0.000634597	0.000388161	0.00437677	0.102667	0.00260349	0.00748677	0.0321804	0.00272457	0.00179871	0.00369337	0.110099	0.00177915	0.0145351	0.00297793	0.0172734	0.00213068	1.78916
PromE(800)-GAL4	Cyp9f2	CG11466	106779/KK	M	5	0.0353853	0.00777355	0.00198538	0.042346	0.00481385	0.00191786	0.0519348	0.524268	0.0212026	0.043003	0.248816	0.00245836	0.0178877	0.0070704	0.011457	0.000579492	0.0116089	0.0247668	0.00729586	0.0308161	0.117406	0.00398721	0.0422921	0.00105492	0.000549032	0.000516535	0.000296914	0.00393897	0.0899722	0.00215577	0.00608144	0.0289976	0.00234176	0.00160297	0.00338153	0.0972971	0.00205531	0.0136944	0.0027784	0.0159102	0.00204623	1.53699
PromE(800)-GAL4	CG18609	CG18609	100172/KK	M	1	0.0415608	0.00871767	0.0013854	0.0533367	0.00584968	0.00276194	0.0752695	0.667251	0.0336537	0.0564673	0.375681	0.00360609	0.0235541	0.0107042	0.0133638	0.000973151	0.0170773	0.107615	0.00919748	0.044507	0.181395	0.00699067	0.0472603	0.00277085	0.00234032	0.000578643	0.000338273	0.00168323	0.0736505	0.00144612	0.00372601	0.00533389	0.00055078	0.000978402	0.000700613	0.0171507	0.00269371	0.00287979	0.000331177	0.00686813	0.00169351	1.91487
PromE(800)-GAL4	CG18609	CG18609	100172/KK	M	2	0.0391171	0.00898603	0.00170255	0.0461837	0.00634748	0.0026186	0.0707242	0.613534	0.028652	0.0517406	0.338715	0.00348257	0.0211985	0.00976368	0.0116178	0.000727823	0.0148109	0.111002	0.0093481	0.0441907	0.172181	0.00579528	0.0435385	0.00258816	0.00238995	0.000569162	0.000379999	0.00156815	0.0723991	0.00163628	0.00406157	0.00495615	0.000534596	0.00101526	0.000605926	0.0177869	0.00264497	0.00275099	0.000280542	0.00738778	0.00185601	1.78226
PromE(800)-GAL4	CG18609	CG18609	100172/KK	M	3	0.0440089	0.00965454	0.00175596	0.0541241	0.00628204	0.00285521	0.0771334	0.666098	0.0246752	0.0548669	0.394657	0.00381943	0.0238326	0.0103739	0.0125661	0.000721662	0.0177183	0.114437	0.0105836	0.0482441	0.183653	0.00613696	0.0496811	0.00277432	0.0026015	0.000613716	0.000379875	0.00191914	0.0800105	0.00165787	0.00388556	0.0062388	0.000640529	0.0012609	0.000734451	0.0222139	0.0031195	0.00350565	0.000327132	0.00900602	0.00198692	1.96173
PromE(800)-GAL4	CG18609	CG18609	100172/KK	M	4	0.0346775	0.00725182	0.00141292	0.0438002	0.00466661	0.00195451	0.0574632	0.498134	0.0241845	0.0423965	0.313564	0.00287962	0.0178759	0.00787014	0.00987435	0.000612323	0.0141904	0.0904901	0.0070241	0.0342301	0.135971	0.00453932	0.0390178	0.00215061	0.00215637	0.000457918	0.000270752	0.00144424	0.0615292	0.00122206	0.00273583	0.00454672	0.000433632	0.000905201	0.000574464	0.0152969	0.00196864	0.00261543	0.000281832	0.00646549	0.00160892	1.50138
PromE(800)-GAL4	CG18609	CG18609	100172/KK	M	5	0.0411773	0.00889702	0.00180101	0.0488559	0.00596008	0.00259482	0.069407	0.597827	0.0324297	0.0503241	0.345536	0.00342139	0.020769	0.00943903	0.0115609	0.000771697	0.0149447	0.104451	0.00870304	0.0403158	0.158279	0.00540176	0.0422239	0.00237817	0.00222919	0.000472938	0.000418621	0.00146517	0.067156	0.00145876	0.0032628	0.00463557	0.000463726	0.000909678	0.000533525	0.0151328	0.00225105	0.00247194	0.000232397	0.00624893	0.00157494	1.73909
PromE(800)-GAL4	CG5599	CG5599	106456/KK	M	1	0.0847845	0.0202912	0.00447821	0.0809847	0.032971	0.00828916	0.146993	1.32771	0.0599874	0.12409	0.661804	0.00988768	0.00929839	0.0391391	0.0224722	0.031097	0.0250521	0.173409	0.0297797	0.0972477	0.32128	0.00992946	0.104758	0.0138666	0.00357223	0.00128242	0.00101749	0.00660006	0.402239	0.00297427	0.0123205	0.0504706	0.0122558	0.00497954	0.00528567	0.326082	0.009656	0.0368438	0.00589724	0.0498717	0.00912886	4.38242
PromE(800)-GAL4	CG5599	CG5599	106456/KK	M	2	0.162175	0.0378946	0.0075842	0.124769	0.0209926	0.0297854	0.252924	2.25651	0.0675429	0.191408	1.00884	0.0110216	0.0553263	0.0323785	0.0380865	0.0022856	0.0313775	0.179729	0.0561011	0.154226	0.480007	0.0152003	0.147381	0.0129082	0.00494425	0.00127038	0.0011042	0.00792212	0.419427	0.00630596	0.0203457	0.0696305	0.0130983	0.00816446	0.00589167	0.381153	0.0162463	0.0411414	0.0086973	0.0535316	0.00943368	6.45135
PromE(800)-GAL4	CG5599	CG5599	106456/KK	M	3	0.1035	0.0242758	0.00498443	0.0947894	0.022076	0.00963665	0.162313	1.50431	0.0471407	0.12545	0.749854	0.00871434	0.0420832	0.0223077	0.0271384	0.0014146	0.0274517	0.123033	0.0390639	0.114507	0.354082	0.0111653	0.125943	0.0083785	0.00408561	0.00107816	0.00207818	0.00800118	0.301262	0.00475375	0.0156066	0.0671276	0.008613	0.00700521	0.00639365	0.27293	0.0111295	0.0359494	0.00760594	0.042822	0.00700289	4.56174
PromE(800)-GAL4	CG5599	CG5599	106456/KK	M	4	0.134029	0.0287187	0.00642432	0.129252	0.022191	0.00759697	0.175008	1.76889	0.0620551	0.15567	0.958837	0.012424	0.0535611	0.0270409	0.0328971	0.00259829	0.0366149	0.125995	0.0376743	0.118083	0.391689	0.0132148	0.159652	0.00824191	0.00462366	0.00121242	0.00146162	0.0108226	0.311004	0.0045011	0.0172551	0.0891627	0.00955779	0.00863691	0.00849837	0.31233	0.011691	0.0471772	0.0109929	0.0543948	0.00856998	5.38418
PromE(800)-GAL4	CG5599	CG5599	106456/KK	M	5	0.159603	0.0359049	0.00714827	0.158278	0.0131326	0.0138318	0.243106	2.17021	0.0594574	0.193016	1.0135	0.0131194	0.0708233	0.0333244	0.0398027	0.00208127	0.0406245	0.0864741	0.0613205	0.167436	0.55739	0.0182611	0.170387	0.00657427	0.00503285	0.00205312	0.00151782	0.0121294	0.248824	0.00834578	0.0294602	0.101905	0.00940165	0.0102954	0.00908435	0.331931	0.0187638	0.0552377	0.0161247	0.0641986	0.0105818	6.27678
PromE(800)-GAL4	CG7724	CG7724	105609/KK	M	1	0.0380878	0.00793689	0.00164021	0.0393391	0.00599079	0.00175684	0.0488831	0.561695	0.0264777	0.0467985	0.308783	0.00236851	0.0148551	0.00761309	0.00982022	0.000769038	0.0110955	0.0338089	0.00589065	0.029106	0.128657	0.00410933	0.0498989	0.00215686	0.000742461	0.000318093	0.000313113	0.00355824	0.0962543	0.000800116	0.00429624	0.0261813	0.0024829	0.00147015	0.00203556	0.0923153	0.00150239	0.00889743	0.00189704	0.0136111	0.00173751	1.64651
PromE(800)-GAL4	CG7724	CG7724	105609/KK	M	2	0.042887	0.0105047	0.00240916	0.0415779	0.00893676	0.00210037	0.0652128	0.705598	0.0369493	0.0587478	0.303955	0.00297037	0.0186302	0.00945852	0.0131337	0.00105405	0.0103017	0.0474446	0.00560891	0.03152	0.14603	0.00455948	0.0429415	0.00279435	0.000897108	0.00035772	0.000345839	0.00258192	0.117775	0.000876186	0.00428881	0.0172562	0.002723	0.00137474	0.00135145	0.0902949	0.00132649	0.00532031	0.00151721	0.010852	0.00145396	1.87662
PromE(800)-GAL4	CG7724	CG7724	105609/KK	M	3	0.0350678	0.00888283	0.00196834	0.0366875	0.00667537	0.00181801	0.0543869	0.594032	0.0249048	0.0490944	0.251268	0.00259117	0.0175234	0.00817308	0.011747	0.00084908	0.00919996	0.0367135	0.00511145	0.0289139	0.130521	0.00398745	0.0362995	0.00230021	0.000818794	0.000329993	0.000289532	0.00239001	0.0974154	0.000752214	0.00366586	0.0162469	0.00237744	0.00131444	0.00129162	0.0821395	0.00113571	0.00548803	0.00160792	0.0103182	0.00131278	1.58802
PromE(800)-GAL4	CG7724	CG7724	105609/KK	M	4	0.0359535	0.00827167	0.00173847	0.034674	0.00705918	0.00169741	0.0500548	0.560882	0.0218077	0.0453206	0.247397	0.0022908	0.0152222	0.0073475	0.0101372	0.000684758	0.00838451	0.0367195	0.00488135	0.0261612	0.118683	0.00307589	0.0351283	0.00212779	0.000616308	0.000287087	0.000295702	0.00209417	0.0973639	0.000680137	0.0032256	0.0150097	0.00228902	0.00090422	0.00114994	0.0786287	0.000992007	0.0047104	0.000925229	0.00972413	0.00129433	1.50611
PromE(800)-GAL4	CG7724	CG7724	105609/KK	M	5	0.0359202	0.0075364	0.00153655	0.0355801	0.00648335	0.00159236	0.0452824	0.519601	0.0225059	0.0423712	0.269358	0.00231522	0.0139403	0.0069188	0.00893744	0.000582358	0.00935374	0.0379138	0.00519013	0.0263671	0.113386	0.0032438	0.0401197	0.00215726	0.000780847	0.000284034	0.000269635	0.00265424	0.102843	0.00103971	0.00389084	0.0180407	0.00240746	0.00146585	0.00136361	0.0851762	0.0013132	0.00573256	0.00155734	0.0121473	0.00162622	1.50111
PromE(800)-GAL4	Irc	CG8913	101098/KK	M	1	0.0515084	0.011419	0.00279145	0.0469776	0.00830276	0.00324004	0.0848296	0.754271	0.0313675	0.0612156	0.312523	0.00408523	0.0249088	0.0103255	0.0150256	0.000909534	0.0114078	0.0488871	0.00992079	0.0434725	0.163284	0.00501899	0.0440413	0.00292316	0.00150809	0.000541785	0.000405286	0.00293504	0.120053	0.0016345	0.0049067	0.0184324	0.00312158	0.00237762	0.00165239	0.102368	0.00258658	0.00601504	0.00252964	0.0120922	0.00159475	2.03849
PromE(800)-GAL4	Irc	CG8913	101098/KK	M	2	0.0557066	0.0119644	0.00246974	0.0482856	0.00955048	0.00382258	0.0986198	0.884658	0.0455198	0.073778	0.336315	0.00440272	0.0275166	0.0123627	0.0173171	0.00128551	0.0117937	0.0496412	0.0107682	0.0481576	0.192548	0.00671811	0.0481851	0.0026674	0.00130168	0.000593163	0.000424038	0.00304403	0.124905	0.0023745	0.00660454	0.0194823	0.00305231	0.00211546	0.00173555	0.107147	0.0031506	0.00645783	0.00235942	0.0132306	0.00178076	2.3051
PromE(800)-GAL4	Irc	CG8913	101098/KK	M	3	0.0583041	0.012294	0.00233964	0.049619	0.00976526	0.00404267	0.0993938	0.89143	0.036337	0.07261	0.339497	0.00429323	0.0280485	0.012175	0.016942	0.00108962	0.011685	0.0495274	0.0122434	0.0497912	0.195306	0.00657666	0.0472592	0.00314078	0.00146322	0.000652481	0.000456912	0.00280889	0.12333	0.00200798	0.00652435	0.0184243	0.00317753	0.00213193	0.00152035	0.102558	0.00324649	0.00580942	0.002257	0.0121111	0.00151219	2.3051
PromE(800)-GAL4	Irc	CG8913	101098/KK	M	4	0.0573189	0.0122616	0.00261707	0.0502573	0.0098083	0.00385805	0.0995502	0.902554	0.0413217	0.0748893	0.340745	0.00456702	0.0284916	0.0126582	0.0182849	0.00152018	0.0121551	0.0508531	0.0115996	0.0507385	0.200413	0.00668725	0.0487924	0.00276065	0.00143829	0.000621483	0.00046912	0.0050001	0.123709	0.00217106	0.00688788	0.021409	0.0031906	0.0022424	0.00480401	0.100485	0.0031877	0.009054	0.00254791	0.0116809	0.00427404	2.35003
PromE(800)-GAL4	Irc	CG8913	101098/KK	M	5	0.0553603	0.0124101	0.0025436	0.0500341	0.00954802	0.00419005	0.101522	0.925809	0.0317162	0.0760547	0.343457	0.00460335	0.029421	0.0128991	0.0191693	0.00172188	0.0121449	0.0532186	0.0134659	0.0567473	0.218436	0.00694497	0.049425	0.00320338	0.00145438	0.000635349	0.000501225	0.00319223	0.124375	0.00255838	0.00786065	0.0204388	0.00305894	0.00223109	0.0020388	0.10175	0.00391983	0.00673046	0.00297762	0.0128143	0.00159268	2.39464
PromE(800)-GAL4	CG9458	CG9458	102418/KK	M	1	0.0344384	0.00907194	0.00181407	0.0423682	0.0112151	0.00287211	0.0626833	0.611618	0.019419	0.0455326	0.266448	0.00313181	0.0195643	0.00905334	0.0126278	0.000939623	0.0103419	0.0293706	0.0100437	0.0376988	0.153478	0.00511895	0.0389287	0.00144224	0.000741243	0.000468739	0.000454278	0.00272242	0.0862195	0.00163193	0.00555724	0.0200336	0.00251544	0.00160168	0.00222495	0.0930639	0.00228527	0.00843216	0.00251492	0.0135576	0.00172009	1.68598
PromE(800)-GAL4	CG9458	CG9458	102418/KK	M	2	0.0594404	0.0175498	0.00384973	0.0692928	0.0210916	0.00564832	0.116729	1.12343	0.0385487	0.082591	0.407813	0.00583759	0.0361696	0.0169886	0.0240776	0.00169098	0.0157403	0.0492022	0.0181616	0.0664876	0.273002	0.00764496	0.0567186	0.00337026	0.00155752	0.000778336	0.000690169	0.00357246	0.131941	0.0033745	0.0107737	0.0245499	0.00367258	0.00262045	0.00248538	0.12349	0.00408659	0.00938404	0.00368596	0.0150701	0.00192149	2.86785
PromE(800)-GAL4	CG9458	CG9458	102418/KK	M	3	0.0460601	0.0125887	0.00238433	0.0496323	0.0152496	0.0037687	0.086048	0.829478	0.0338709	0.061023	0.347188	0.00428108	0.0236453	0.012254	0.0147576	0.000849437	0.011996	0.0389374	0.0126631	0.0508551	0.204805	0.00665167	0.0506852	0.00252395	0.00122254	0.000555946	0.000511685	0.00301557	0.110183	0.00225407	0.00752865	0.0236768	0.00315607	0.00218156	0.00199604	0.108902	0.00315051	0.00928383	0.00270416	0.0136177	0.0017869	2.21975
PromE(800)-GAL4	CG9458	CG9458	102418/KK	M	4	0.0514001	0.0134827	0.00291338	0.057668	0.0161404	0.00365436	0.0897321	0.879969	0.0654036	0.0692697	0.403473	0.00455156	0.0239834	0.0138329	0.0164928	0.00131374	0.0146805	0.0409208	0.0113693	0.0478537	0.207067	0.00795114	0.0624776	0.00229949	0.000996727	0.000489529	0.000538746	0.00343614	0.107254	0.00279955	0.00827338	0.0263591	0.00298083	0.00190513	0.00224085	0.102597	0.00311693	0.0104115	0.00247126	0.0124942	0.00217316	2.3999
PromE(800)-GAL4	CG9458	CG9458	102418/KK	M	5	0.0393071	0.010169	0.00202256	0.0469334	0.0116636	0.00349516	0.0716104	0.659239	0.0251667	0.0499986	0.295106	0.00348926	0.0212877	0.0103763	0.0135373	0.000898746	0.0114293	0.0287849	0.0120491	0.0434118	0.175052	0.00501552	0.0434642	0.00194566	0.000851126	0.000532749	0.0004489	0.00302265	0.0858182	0.00253604	0.00684133	0.0223579	0.00257948	0.00168733	0.00221305	0.0928822	0.00253217	0.0094151	0.00252742	0.0137271	0.00187055	1.83885
PromE(800)-GAL4	Nrt	CG9704	106080/KK	M	1	0.042697	0.00918379	0.0018864	0.0384349	0.00701257	0.00281647	0.0665831	0.650555	0.0288098	0.051775	0.263028	0.00291971	0.0183381	0.00864121	0.0127389	0.000900806	0.00904574	0.0337525	0.0069578	0.0302001	0.130762	0.00399794	0.0384032	0.00225559	0.000854697	0.000359508	0.000305118	0.00235155	0.0926933	0.000909857	0.00396668	0.0189856	0.00288442	0.00170083	0.00154726	0.102518	0.00162824	0.00770177	0.00241251	0.0147096	0.00174018	1.71981
PromE(800)-GAL4	Nrt	CG9704	106080/KK	M	2	0.0421788	0.010151	0.00251055	0.037973	0.00760827	0.00277194	0.0673412	0.657718	0.0313833	0.0521553	0.264027	0.00301496	0.0183303	0.00872457	0.0128187	0.00088041	0.00902724	0.038821	0.00677952	0.0301749	0.131899	0.00425553	0.0384218	0.00250196	0.0010154	0.000350535	0.000320657	0.00223859	0.101533	0.000850699	0.00392289	0.0175297	0.00283346	0.00185262	0.00142684	0.099182	0.00183264	0.00677507	0.0023177	0.0129222	0.00170735	1.74093
PromE(800)-GAL4	Nrt	CG9704	106080/KK	M	3	0.0448762	0.0104793	0.00244104	0.0407943	0.00733979	0.0031354	0.0712879	0.679882	0.0271298	0.0526987	0.274776	0.00320903	0.0197034	0.00905514	0.0131498	0.000863972	0.00951997	0.0367311	0.00777171	0.0336334	0.141909	0.00403184	0.0394689	0.00239051	0.000973806	0.000396297	0.000350045	0.00236696	0.098298	0.00106121	0.00423333	0.0189372	0.00284044	0.00181748	0.00150214	0.101974	0.00178169	0.00757023	0.00239736	0.0140306	0.00178486	1.79967
PromE(800)-GAL4	Nrt	CG9704	106080/KK	M	4	0.0475007	0.0114479	0.00263445	0.042241	0.00797128	0.00334008	0.0756478	0.735141	0.0314919	0.0578145	0.300766	0.00380453	0.0200798	0.00978593	0.0137402	0.00091679	0.0102059	0.0396429	0.00799791	0.0347949	0.149374	0.00411615	0.0439442	0.00256535	0.000929113	0.000362422	0.000355089	0.00247759	0.103007	0.00102385	0.00424368	0.0204553	0.0029502	0.00174963	0.00147826	0.105666	0.00157184	0.00769822	0.00216124	0.0139237	0.00179792	1.9294
PromE(800)-GAL4	Nrt	CG9704	106080/KK	M	5	0.0375199	0.00869112	0.00197194	0.0334952	0.00668541	0.00249445	0.058853	0.563285	0.0246261	0.0447939	0.242595	0.00267041	0.015498	0.00758183	0.0106883	0.000666862	0.00821147	0.0341109	0.00614267	0.0279452	0.119148	0.00360886	0.0367634	0.00234541	0.000864805	0.000306861	0.000330767	0.00220154	0.0950242	0.000999403	0.00361234	0.0185846	0.0027787	0.00158799	0.00142727	0.0998051	0.00155335	0.00761713	0.00206409	0.0140029	0.00168043	1.55541
PromE(800)-GAL4	CG9801	CG9801	104525/KK	M	1	0.0507037	0.0124415	0.00295852	0.0531076	0.00685009	0.00395661	0.0917591	0.862841	0.0377463	0.076626	0.365797	0.00444606	0.0280132	0.012858	0.0182814	0.0013118	0.0143517	0.0427469	0.0138098	0.0550777	0.229441	0.00770549	0.0578028	0.00254545	0.00142864	0.000591639	0.000539008	0.00346777	0.116452	0.00268665	0.00858826	0.0261723	0.00291636	0.00273899	0.00230398	0.110484	0.0036649	0.00952561	0.00342112	0.0156859	0.00214439	2.36763
PromE(800)-GAL4	CG9801	CG9801	104525/KK	M	2	0.0759307	0.0188327	0.00418583	0.0726703	0.0102427	0.00600808	0.13291	1.24596	0.0543895	0.109517	0.484122	0.00597761	0.0385983	0.0175169	0.024582	0.00151047	0.0178756	0.055642	0.0193658	0.0743569	0.304013	0.0100128	0.0694576	0.00315018	0.00193945	0.000802116	0.000662217	0.00372086	0.137866	0.00334205	0.010282	0.0264767	0.00315775	0.00304149	0.00213439	0.112503	0.0040717	0.00885841	0.00325242	0.0141827	0.00210738	3.19677
PromE(800)-GAL4	CG9801	CG9801	104525/KK	M	3	0.0405396	0.0105044	0.00220224	0.0413555	0.00595707	0.0035097	0.0763062	0.719501	0.0194334	0.0624469	0.284109	0.00359965	0.0236119	0.0102395	0.0145855	0.000854887	0.0110603	0.0360321	0.0124573	0.0474021	0.188524	0.00588916	0.0434323	0.00190563	0.00125969	0.000492149	0.000988681	0.00255665	0.0980841	0.00212173	0.00699429	0.0188508	0.00239933	0.00223923	0.0016656	0.0887603	0.00281021	0.00689969	0.00258772	0.012081	0.00160556	1.91895
PromE(800)-GAL4	CG9801	CG9801	104525/KK	M	4	0.0428632	0.010957	0.00240584	0.0440947	0.00603003	0.00339742	0.0806587	0.753305	0.0369046	0.0667407	0.305146	0.00396486	0.0245762	0.0113655	0.0157936	0.000942044	0.0121073	0.0360994	0.011565	0.0482722	0.202891	0.00707184	0.048953	0.00231559	0.00139985	0.000587603	0.000452956	0.00287846	0.09883	0.00226369	0.00751972	0.0209006	0.00244705	0.00233753	0.00183431	0.0917218	0.00316449	0.00785045	0.00273025	0.0133414	0.00201007	2.04199
PromE(800)-GAL4	CG9801	CG9801	104525/KK	M	5	0.0467432	0.0113589	0.00235924	0.0487956	0.00630782	0.00351335	0.0845497	0.78797	0.0364789	0.0701672	0.345586	0.00417374	0.0254634	0.0119762	0.015961	0.000961	0.0135381	0.0402025	0.0125627	0.0522023	0.21734	0.00767176	0.0552896	0.00250754	0.00144966	0.000590871	0.000517563	0.00326888	0.111344	0.0019878	0.00745623	0.0243352	0.00285261	0.00254301	0.00205091	0.106521	0.00328291	0.00893681	0.00293536	0.0148192	0.00201154	2.2018
PromE(800)-GAL4	Cyp49a1	CG18377	101530/KK	M	1	0.0279378	0.00556383	0.0013698	0.0382791	0.00355755	0.00178824	0.0442314	0.450028	0.0382376	0.0407759	0.255987	0.0013604	0.00289522	0.0169953	0.00824049	0.0102253	0.0123602	0.0230031	0.00855366	0.0389749	0.150599	0.00535665	0.0490794	0.00167142	0.000990597	0.000820188	0.000728834	0.00436587	0.0717641	0.00137124	0.0066509	0.0300812	0.00204695	0.00162326	0.00346359	0.0910292	0.00287238	0.013981	0.00280441	0.0209637	0.00393453	1.49715
PromE(800)-GAL4	Cyp49a1	CG18377	101530/KK	M	2	0.033459	0.0077969	0.00172102	0.0422666	0.00686145	0.00341585	0.0635122	0.608247	0.0498699	0.0490145	0.2875	0.00256369	0.00374982	0.0218163	0.0108249	0.0127832	0.0132431	0.0494773	0.0126679	0.0494261	0.183427	0.00605776	0.0516773	0.0028835	0.00120682	0.000917878	0.000743041	0.0040477	0.107793	0.00160508	0.00689947	0.0270449	0.00253634	0.00149512	0.00336302	0.103049	0.0038475	0.0127762	0.00231941	0.0225919	0.00403087	1.88121
PromE(800)-GAL4	Cyp49a1	CG18377	101530/KK	M	3	0.0288105	0.00552224	0.00129949	0.0384377	0.0038077	0.00183665	0.0436687	0.449775	0.0366283	0.0386338	0.274291	0.00127006	0.0025707	0.015808	0.00788095	0.00931492	0.0122072	0.0241523	0.00748073	0.0353419	0.137762	0.00442071	0.0495968	0.00173516	0.000806333	0.000623094	0.000556457	0.0041386	0.0749355	0.00103036	0.00504523	0.0309283	0.0021922	0.00138965	0.00352521	0.098364	0.00281569	0.0146171	0.0024969	0.0218545	0.00342508	1.50167
PromE(800)-GAL4	Cyp49a1	CG18377	101530/KK	M	4	0.0319826	0.00599189	0.00124641	0.04057	0.00371281	0.00200894	0.0479031	0.485724	0.0356722	0.0440182	0.28994	0.0012937	0.00285251	0.0173387	0.00837809	0.0100121	0.0125696	0.022646	0.00861733	0.0381545	0.151125	0.00484637	0.0517285	0.00171981	0.000939036	0.000736464	0.000618273	0.00418327	0.0725616	0.00122688	0.00678247	0.032321	0.00207943	0.00157018	0.00342964	0.0933928	0.00262278	0.0150388	0.00292666	0.0199718	0.00339523	1.5843
PromE(800)-GAL4	Cyp49a1	CG18377	101530/KK	M	5	0.0393719	0.00846126	0.0017539	0.046515	0.00656368	0.00249369	0.0644043	0.664236	0.0504069	0.0546961	0.316831	0.00194443	0.00364253	0.0237155	0.0107281	0.0140052	0.0137709	0.0383299	0.00840443	0.0429979	0.171541	0.00539601	0.0511786	0.0025511	0.00116038	0.000814088	0.00070686	0.00400302	0.10575	0.00118308	0.00587333	0.0270042	0.00268183	0.00168819	0.00289941	0.103801	0.00221614	0.010825	0.00237087	0.0185044	0.00240835	1.93818
PromE(800)-GAL4	KK Control	Control	60100/KK	M	1	0.0277389	0.0057551	0.00155319	0.0354851	0.0036624	0.00103683	0.0459613	0.411131	0.0467438	0.039926	0.238017	0.00114826	0.00226004	0.0137276	0.00729165	0.00886566	0.0107615	0.0220447	0.00368321	0.0243382	0.104459	0.00471687	0.0406897	0.00184	0.000860499	0.000547001	0.000702087	0.00334537	0.0797499	0.000665308	0.00385662	0.0229108	0.00212004	0.0014423	0.00247055	0.0817777	0.00110197	0.00888458	0.00208661	0.012927	0.00200037	1.33058
PromE(800)-GAL4	KK Control	Control	60100/KK	M	2	0.0287018	0.00589271	0.0012959	0.0360562	0.00432135	0.00116557	0.0481113	0.434109	0.045346	0.0407881	0.242925	0.00119767	0.00234492	0.0145677	0.00743851	0.00936357	0.0109466	0.0250861	0.00393667	0.0254366	0.108209	0.00461583	0.0413802	0.00193014	0.000811985	0.000500394	0.000622775	0.00341339	0.086461	0.000913564	0.00400846	0.023161	0.00231647	0.00154018	0.00247445	0.0863275	0.00111519	0.00879817	0.00219157	0.0127038	0.00195112	1.38476
PromE(800)-GAL4	KK Control	Control	60100/KK	M	3	0.0294924	0.00601915	0.00141408	0.0381076	0.00384364	0.000994181	0.0498764	0.441727	0.0425136	0.03919	0.248198	0.00114374	0.00237166	0.0150152	0.00749633	0.00944158	0.0115361	0.023307	0.00416083	0.0275397	0.112604	0.00447876	0.042626	0.0019416	0.000758452	0.00051433	0.000742295	0.00361497	0.0855282	0.000784829	0.00412823	0.0246396	0.00229522	0.00143055	0.0025833	0.0874742	0.0012274	0.00945506	0.00210834	0.0131651	0.00199677	1.4078
PromE(800)-GAL4	KK Control	Control	60100/KK	M	4	0.0231986	0.00486011	0.000698505	0.0247344	0.00526813	0.00114657	0.0401006	0.361883	0.0208317	0.0307432	0.188502	0.00178627	0.010333	0.00509175	0.00616782	0.000405337	0.0074182	0.0314695	0.00415726	0.0218326	0.0849305	0.00338173	0.0307777	0.00190399	0.000671885	0.000292847	0.000247702	0.00226417	0.100256	0.000950561	0.00331291	0.0154936	0.00233544	0.0014331	0.00150191	0.0837	0.00107051	0.00545151	0.00155426	0.0109024	0.00138834	1.14511
PromE(800)-GAL4	KK Control	Control	60100/KK	M	5	0.0310218	0.00670521	0.00153511	0.0373871	0.00526216	0.00116963	0.0534348	0.484735	0.0487224	0.0471868	0.26538	0.00247092	0.0150373	0.00812631	0.0100022	0.00105007	0.0113056	0.0328181	0.00477409	0.0292845	0.122729	0.00619901	0.0454957	0.00186187	0.000658613	0.00043551	0.000511345	0.00342699	0.100462	0.00135555	0.00496691	0.0244315	0.00264015	0.00133157	0.0025119	0.0992037	0.00175434	0.00942123	0.00189027	0.0143911	0.00181154	1.54574

## Sheet: I
Driver	UAS-RNAi	CG Number	Transformant ID	Sex	Sample	n-C21 (1)	x-C22:1 (2)	x-C22:1 (3)	n-C22 (4)	2-Me-C22 (6)	NI (7)	9-C23:1 (8)	7-C23:1 (9)	6-C23:1 (10)	5-C23:1 (11)	n-C23 (13)	x,y-C24:2 (16)	3-Me-C23 (17)	7-C24:1 (18)	6-C24:1 (19)	5-C24:1 (21)	n-C24 (22)	2-Me-C24 (25)	6,10-C25:2 (26)	9-C25:1 (27)	7-C25:1 (29)	5-C25:1 (31)	n-C25 (32)	2-Me-C25 (39)	3-Me-C25 (41)	7-C26:1 (42)	6-C26:1/ i (43)	n-C26 (44)	2-Me-C26 (46)	9-C27:1 (47)	7-C27:1 (48)	n-C27 (50)	2-Me-C27 (52)	NI (54)	n-C28 (55)	2-Me-C28 (57)	7-C29:1 (59)	n-C29 (60)	2-Me-C29 (61)	2-Me-C30 (62)	n-C31 (64)	Total CHCs (ug/fly)
PromE(800)-GAL4	CG14688	CG14688	39840/GD	M	1	0.0724584	0.0195342	0.00502901	0.062386	0.0120439	0.0115329	0.15626	1.19304	0.046489	0.0835876	0.441103	0.00613122	0.0373242	0.0146479	0.0200297	0.00116471	0.0160874	0.141705	0.0218767	0.0636213	0.187407	0.00586339	0.0598675	0.00669924	0.00299629	0.000473304	0.000322186	0.00269426	0.221651	0.0010139	0.00408726	0.0147823	0.00416812	0.0029202	0.00130778	0.115171	0.00210574	0.00455168	0.00188129	0.0195355	0.00212026	3.08832
PromE(800)-GAL5	CG14688	CG14688	39840/GD	M	2	0.0542119	0.0155794	0.00465921	0.0502164	0.0124602	0.00738116	0.110953	0.946328	0.0333685	0.0695276	0.345667	0.00473667	0.0281279	0.0113422	0.016769	0.00111525	0.0130023	0.131544	0.0141408	0.0467611	0.138114	0.00421365	0.0475441	0.00600097	0.00238449	0.00032634	0.000740015	0.00241396	0.19991	0.00152721	0.00380507	0.0124759	0.00352237	0.00222196	0.00143723	0.0947102	0.00189436	0.003985	0.00134908	0.0160207	0.00164706	2.46503
PromE(800)-GAL6	CG14688	CG14688	39840/GD	M	3	0.0527119	0.0130048	0.00417118	0.0502536	0.00837966	0.00688025	0.101815	0.807491	0.0279097	0.0571004	0.304227	0.00520885	0.0288075	0.00977489	0.0181349	0.00175355	0.0121068	0.0828516	0.0122523	0.0367956	0.118217	0.00294868	0.0409856	0.00417117	0.00203047	0.000299471	0.00026266	0.0022942	0.151393	0.00072092	0.00290801	0.0130124	0.00305889	0.00243911	0.00128855	0.0914948	0.00178367	0.00412094	0.00222383	0.0157813	0.00160294	2.10548
PromE(800)-GAL7	CG14688	CG14688	39840/GD	M	4	0.0512563	0.0131063	0.00426307	0.04905	0.00999351	0.00523666	0.0964055	0.816296	0.0323867	0.0608149	0.321598	0.00518945	0.027193	0.0099883	0.0178044	0.00169475	0.0124907	0.10271	0.0100343	0.0359987	0.121683	0.00337795	0.0433461	0.00496403	0.00235553	0.000277594	0.000251766	0.00229909	0.17374	0.000634143	0.00291758	0.0121989	0.00319987	0.00242043	0.00151562	0.0922694	0.00166519	0.00429715	0.00185591	0.0170752	0.00184314	2.17837
PromE(800)-GAL8	CG14688	CG14688	39840/GD	M	5	0.0452202	0.0119164	0.00345506	0.0459262	0.00854077	0.00544271	0.088184	0.738905	0.0268641	0.0539684	0.300421	0.0039416	0.0246949	0.0092237	0.0144292	0.000918444	0.012097	0.0920891	0.0105393	0.0344685	0.118447	0.00307839	0.0418988	0.00451263	0.00193518	0.000311378	0.000255812	0.00228033	0.161737	0.000610472	0.00278874	0.0121326	0.00316592	0.00238469	0.00128803	0.0921086	0.00162433	0.00417472	0.00176641	0.0171818	0.00194773	2.00733
PromE(800)-GAL9	CG8814	CG8814	2606/GD	M	1	0.0400367	0.0120321	0.00298741	0.0585174	0.00646424	0.0051067	0.0966292	0.849729	0.0322498	0.0641817	0.378799	0.00470493	0.033992	0.0121039	0.0178386	0.000958026	0.0194171	0.073999	0.0130338	0.0576939	0.184891	0.00545887	0.0651384	0.00372843	0.00178792	0.000759604	0.000426118	0.00523067	0.16257	0.00202566	0.00625627	0.024014	0.00360206	0.00262633	0.00313074	0.119727	0.00216883	0.0072516	0.00249426	0.0198692	0.00211665	2.40646
PromE(800)-GAL10	CG8814	CG8814	2606/GD	M	2	0.0529524	0.0148879	0.00374841	0.0729627	0.00694457	0.00731329	0.122215	1.0054	0.0362447	0.0735404	0.449626	0.00559324	0.0395419	0.0135646	0.0203224	0.00116496	0.0220584	0.0833076	0.0163683	0.0655485	0.198182	0.00549171	0.0720778	0.00397796	0.0019361	0.000763032	0.000457397	0.00548571	0.166366	0.0024213	0.00698479	0.0257911	0.00357819	0.00272907	0.00317282	0.115321	0.00213727	0.00760978	0.00259128	0.0196179	0.00205188	2.76265
PromE(800)-GAL11	CG8814	CG8814	2606/GD	M	3	0.0459228	0.0129241	0.004153	0.0689994	0.00553556	0.00511837	0.105586	0.910886	0.0348251	0.0691156	0.386558	0.00551816	0.0398902	0.0130768	0.0230313	0.00193493	0.0206904	0.0658054	0.0165644	0.0647624	0.201541	0.0059892	0.0658644	0.00281161	0.00209924	0.000839065	0.000531349	0.0053938	0.136927	0.00209949	0.00738196	0.0273645	0.00310838	0.00303693	0.00346131	0.110431	0.00298568	0.00879593	0.00357731	0.0196817	0.00202386	2.51808
PromE(800)-GAL12	CG8814	CG8814	2606/GD	M	4	0.0426431	0.011717	0.00353638	0.0637541	0.00469324	0.00454826	0.0949673	0.808598	0.0281184	0.0654625	0.336988	0.00519346	0.0374309	0.0116959	0.0210847	0.00167156	0.0183507	0.0445615	0.0142019	0.0598183	0.186431	0.0055379	0.0579762	0.00221887	0.00217093	0.000846973	0.000518051	0.0051958	0.103333	0.00219456	0.00753081	0.0275249	0.00264918	0.00334679	0.00370383	0.0994341	0.00393252	0.0100079	0.00461041	0.0205592	0.00225843	2.23259
PromE(800)-GAL13	CG8814	CG8814	2606/GD	M	5	0.0688809	0.0188449	0.0052983	0.101354	0.00615566	0.00687063	0.146546	1.29864	0.043011	0.107038	0.524427	0.00790183	0.0580512	0.0184099	0.0306572	0.00198431	0.0279743	0.0640116	0.0216882	0.0895622	0.286513	0.00896103	0.0864268	0.00262564	0.00286978	0.00124529	0.000676945	0.00747015	0.137801	0.00326203	0.0109759	0.0383703	0.00335515	0.00432792	0.00483484	0.126975	0.00502015	0.0133844	0.00545261	0.0252796	0.00290382	3.4284
PromE(800)-GAL14	Pxd	CG3477	48587/GD	M	1	0.0408679	0.0104218	0.00235462	0.0523792	0.0062879	0.00384429	0.0824033	0.797228	0.0400653	0.072131	0.349845	0.00229508	0.00522933	0.0295729	0.0120263	0.0173722	0.0161345	0.0521616	0.0096437	0.0532168	0.183987	0.00545613	0.0601394	0.00309832	0.00233037	0.000891544	0.000714468	0.00468378	0.118656	0.00119474	0.00631531	0.0265241	0.00281242	0.00284909	0.00302018	0.102353	0.00226812	0.00854772	0.00374863	0.0193564	0.00198244	2.2167
PromE(800)-GAL15	Pxd	CG3477	48587/GD	M	2	0.0371351	0.00964505	0.00238844	0.0494006	0.00506993	0.0030746	0.0710067	0.677337	0.0215424	0.0590849	0.328217	0.00419028	0.0259285	0.00962121	0.014486	0.000885913	0.0156245	0.0475116	0.0101722	0.0500936	0.159514	0.00487632	0.0588717	0.00229654	0.00192667	0.00060761	0.000415404	0.00473075	0.107144	0.00173782	0.00600797	0.028146	0.0025567	0.00304691	0.003321	0.094994	0.00272913	0.00976265	0.00390395	0.0188839	0.0019812	1.9612
PromE(800)-GAL16	Pxd	CG3477	48587/GD	M	3	0.046128	0.0120613	0.00325865	0.0591211	0.0070784	0.00398446	0.0879155	0.824517	0.0396828	0.0732697	0.381637	0.00535695	0.0315483	0.0125627	0.0187944	0.00154923	0.0179169	0.0589482	0.0108405	0.0573102	0.192872	0.0056241	0.0636526	0.00312226	0.00221105	0.000706008	0.000533254	0.00469517	0.126789	0.00263904	0.00754491	0.0255758	0.00287889	0.00311409	0.00294929	0.100551	0.00295452	0.00808173	0.00352556	0.0167436	0.00192599	2.33301
PromE(800)-GAL17	Pxd	CG3477	48587/GD	M	4	0.0565162	0.0145318	0.00391226	0.0689536	0.00898387	0.00507981	0.103534	0.98617	0.0283617	0.0840126	0.422942	0.00595447	0.0367015	0.0137017	0.0239036	0.00221237	0.0189677	0.064939	0.0143969	0.0689693	0.2148	0.00564689	0.0670815	0.00317138	0.00256033	0.000807787	0.000686045	0.00510596	0.132528	0.0026021	0.00784184	0.0278992	0.00294089	0.00329021	0.0034469	0.104166	0.00383989	0.00883208	0.00425671	0.0175247	0.00169099	2.65521
PromE(800)-GAL18	Pxd	CG3477	48587/GD	M	5	0.0512411	0.0137435	0.00354738	0.0665513	0.00783599	0.00529865	0.1011	0.949978	0.0236971	0.0795627	0.406407	0.00566328	0.0372119	0.0135786	0.0246009	0.0019563	0.0189982	0.0653556	0.0166631	0.0700883	0.22029	0.00591577	0.0649966	0.00310711	0.00218554	0.000816388	0.000620263	0.00498079	0.136012	0.00230046	0.00777707	0.0271724	0.00310867	0.00308484	0.00339016	0.11252	0.00339891	0.0084008	0.00424371	0.0181561	0.00161068	2.59851
PromE(800)-GAL19	Prx6005	CG3083	25020/GD	M	1	0.0652645	0.0155941	0.00290948	0.0773345	0.0053215	0.00905961	0.141729	1.21787	0.0558554	0.105349	0.516189	0.00285076	0.00887661	0.0487081	0.0196169	0.0255045	0.0242301	0.0618835	0.025158	0.104505	0.334243	0.0101187	0.0881987	0.00372516	0.00354065	0.00145411	0.000955343	0.00583038	0.123981	0.00163009	0.00916555	0.030052	0.00266764	0.00383311	0.00263842	0.0997451	0.00508138	0.00826257	0.00402214	0.0231509	0.00310842	3.29997
PromE(800)-GAL20	Prx6005	CG3083	25020/GD	M	2	0.0628245	0.0135526	0.00279091	0.073232	0.00523492	0.00737053	0.120001	1.04152	0.0392166	0.0897332	0.470538	0.00657421	0.0408686	0.0154246	0.0217335	0.00149628	0.0212175	0.0565238	0.0214988	0.0809125	0.256332	0.00826355	0.0775212	0.00312191	0.00275148	0.000901161	0.000559173	0.0054519	0.115394	0.00192331	0.00737308	0.0281568	0.00259899	0.00357746	0.00255719	0.0958272	0.00507037	0.00782401	0.00376658	0.0203852	0.00237244	2.84591
PromE(800)-GAL21	Prx6005	CG3083	25020/GD	M	3	0.0603006	0.0145331	0.00341718	0.0707863	0.00463464	0.00739242	0.117558	1.0107	0.0301895	0.0845234	0.450174	0.00737563	0.0404864	0.0147787	0.0213074	0.00155672	0.020458	0.0526258	0.0209762	0.081465	0.246632	0.00665859	0.0729686	0.00281157	0.00230759	0.000820826	0.000539209	0.00523453	0.109142	0.00193507	0.0069358	0.0272681	0.00243512	0.00328662	0.0025943	0.0905562	0.00429704	0.00761234	0.00348443	0.0185528	0.00211686	2.73481
PromE(800)-GAL22	Prx6005	CG3083	25020/GD	M	4	0.0470528	0.0110615	0.0028173	0.0559975	0.00428452	0.00526293	0.0910508	0.776682	0.0324503	0.0663073	0.36217	0.00495139	0.0311333	0.0115632	0.0174119	0.00129908	0.0164695	0.0448026	0.0148911	0.0614014	0.195201	0.00570988	0.0598682	0.00251256	0.00223038	0.000670514	0.000547551	0.0041614	0.0958747	0.00149556	0.00552994	0.0218616	0.00210068	0.00290343	0.00203786	0.078501	0.00378455	0.00621048	0.00310958	0.0161242	0.00196831	2.17332
PromE(800)-GAL23	Prx6005	CG3083	25020/GD	M	5	0.0426289	0.0100385	0.00257432	0.0472569	0.00334727	0.00504235	0.0807149	0.674839	0.0294877	0.0580566	0.293114	0.00404961	0.0252709	0.00977645	0.0140388	0.00114775	0.0128977	0.0328618	0.0144296	0.052781	0.161351	0.00469532	0.0457159	0.00161317	0.00140287	0.000512092	0.000423813	0.00283395	0.0598247	0.00162481	0.00491597	0.0146354	0.00117456	0.0017092	0.00150246	0.0438328	0.00270131	0.00501226	0.00160345	0.0103065	0.00197721	1.78456
PromE(800)-GAL24	pxn	CG12002	15276/GD	M	1	0.0499093	0.0129595	0.00409041	0.0597766	0.00955701	0.00470064	0.101727	0.888489	0.0347325	0.0763042	0.426785	0.00516613	0.0293138	0.012004	0.0201539	0.00224248	0.0174466	0.090209	0.0134112	0.0593082	0.194182	0.00701743	0.0657684	0.00334982	0.00220996	0.000430542	0.000486857	0.00355326	0.138652	0.00113773	0.00462045	0.0201984	0.00241083	0.00241167	0.00231154	0.0852796	0.0027771	0.00631522	0.00212665	0.0169017	0.00175679	2.48318
PromE(800)-GAL25	pxn	CG12002	15276/GD	M	2	0.0434458	0.0114225	0.00296727	0.0533273	0.00681237	0.00472346	0.0915423	0.788157	0.0293914	0.0648379	0.372699	0.00490279	0.0287762	0.0107873	0.0159656	0.00119602	0.0160702	0.0665498	0.0132575	0.0552362	0.171787	0.00522768	0.0596117	0.00285845	0.002263	0.00046489	0.000341127	0.00355575	0.115222	0.0012679	0.00420377	0.0202567	0.00228821	0.00273549	0.00222454	0.0830287	0.00332374	0.00649277	0.00248224	0.0181934	0.00195555	2.19298
PromE(800)-GAL26	pxn	CG12002	15276/GD	M	3	0.0393381	0.0107667	0.00279027	0.0488228	0.00695316	0.00402672	0.0815516	0.732371	0.0317319	0.0605195	0.336806	0.00525992	0.0270886	0.0105824	0.0149678	0.00118488	0.0154317	0.0682147	0.0105847	0.0490248	0.156554	0.00464335	0.0551265	0.00306427	0.00218428	0.00043208	0.000306423	0.00338088	0.119981	0.00105261	0.0038845	0.0180443	0.00235543	0.00257621	0.00206811	0.0824496	0.00310905	0.00622341	0.00228174	0.0181037	0.00210129	2.04892
PromE(800)-GAL27	pxn	CG12002	15276/GD	M	4	0.0400678	0.0111042	0.00307406	0.0472263	0.00806261	0.00419275	0.0857384	0.760586	0.032733	0.0618128	0.335712	0.00503257	0.025991	0.0103913	0.015366	0.00146684	0.0140646	0.0816797	0.0109922	0.0482957	0.151737	0.00473531	0.0531307	0.00334385	0.00199969	0.00036403	0.000646905	0.00291177	0.133876	0.00101663	0.00343568	0.0165033	0.00251693	0.00234111	0.00195557	0.0859278	0.00304442	0.00564667	0.00195497	0.0170207	0.0018549	2.10049
PromE(800)-GAL28	pxn	CG12002	15276/GD	M	5	0.0436648	0.00982872	0.00245161	0.0575205	0.00400056	0.00402019	0.0757559	0.663776	0.0263048	0.0554684	0.379924	0.0041585	0.023618	0.00890978	0.0119768	0.000878212	0.0173729	0.04466	0.00868451	0.0407955	0.12873	0.00363388	0.0645544	0.00195096	0.00187923	0.000342779	0.000269139	0.00445112	0.0918846	0.00127673	0.0036841	0.0275896	0.00212686	0.00291101	0.00287681	0.0849595	0.00264637	0.00993046	0.00328193	0.0206913	0.00214214	1.94665
PromE(800)-GAL29	Cyp4s3	CG9081	38217/GD	M	1	0.0785235	0.0172925	0.00425945	0.0823598	0.00794851	0.00826452	0.146539	1.17682	0.0426553	0.10396	0.519208	0.00734395	0.0441997	0.0165011	0.022251	0.00150747	0.0208793	0.064944	0.0222679	0.0812568	0.25615	0.00862106	0.0791796	0.00293031	0.00273352	0.000767963	0.000457902	0.00487181	0.127044	0.00315687	0.00845305	0.0315217	0.00275922	0.00359185	0.00290398	0.108786	0.00383765	0.0102329	0.00429305	0.0212919	0.00241404	3.15691
PromE(800)-GAL30	Cyp4s3	CG9081	38217/GD	M	2	0.0950793	0.0205638	0.00504437	0.0976924	0.00803099	0.00930951	0.170646	1.40519	0.04704	0.124976	0.6012	0.01059	0.0531678	0.0198484	0.0262454	0.00219881	0.0240394	0.0609017	0.0230538	0.0953108	0.296966	0.00921507	0.0895411	0.00286779	0.00347861	0.00090796	0.000539	0.00554538	0.120905	0.00273675	0.00879866	0.035374	0.00263443	0.0044373	0.00313317	0.109624	0.00530408	0.0114583	0.00530352	0.0216495	0.00252814	3.64625
PromE(800)-GAL31	Cyp4s3	CG9081	38217/GD	M	3	0.0737491	0.0149885	0.00416681	0.0760383	0.00748383	0.00602294	0.123533	1.03465	0.0398989	0.0920029	0.474764	0.00668865	0.0369838	0.0138163	0.0209813	0.00199346	0.0183815	0.0533826	0.015375	0.0665594	0.211292	0.00648726	0.0720671	0.00244308	0.00241159	0.000615513	0.000433954	0.00464099	0.106615	0.00199138	0.00625665	0.0314929	0.00229714	0.00332665	0.00292298	0.0995646	0.00394605	0.0100645	0.00423754	0.0194631	0.00211768	2.77796
PromE(800)-GAL32	Cyp4s3	CG9081	38217/GD	M	4	0.0679888	0.0149636	0.00409685	0.072294	0.00867169	0.00606817	0.122799	1.03378	0.0321551	0.0899315	0.460541	0.00617063	0.0373424	0.0137343	0.021254	0.00178753	0.0181589	0.0759728	0.0167786	0.0678429	0.212036	0.0066381	0.069928	0.00340652	0.00251246	0.000624544	0.000380051	0.00448678	0.146238	0.00190351	0.00584683	0.0291551	0.00297693	0.00339184	0.00293358	0.1155	0.00366853	0.00953611	0.004204	0.0206693	0.00204085	2.82201
PromE(800)-GAL33	Cyp4s3	CG9081	38217/GD	M	5	0.112122	0.0230961	0.00598779	0.117739	0.00877888	0.0111097	0.190464	1.54063	0.0556872	0.134108	0.667146	0.00942785	0.0577496	0.0203003	0.0324982	0.00315939	0.0263369	0.0669716	0.0279432	0.102431	0.311442	0.0104254	0.0951412	0.00302625	0.00322099	0.000947347	0.000577747	0.00612059	0.123938	0.00287371	0.00888928	0.0381905	0.00271529	0.00465211	0.00364545	0.11185	0.00483844	0.0117295	0.00548951	0.0221846	0.00237119	3.9898
PromE(800)-GAL34	GD Control	Control	60000/GD	M	1	0.0344897	0.00854037	0.00148283	0.051413	0.00494809	0.00311681	0.0741391	0.646464	0.0172873	0.0498124	0.346721	0.0019428	0.00373307	0.0269107	0.00877907	0.0119877	0.0193111	0.0683808	0.00968411	0.0535069	0.142016	0.00432261	0.0633109	0.0039181	0.00218378	0.00110863	0.000607394	0.00595761	0.147264	0.00173397	0.00547767	0.0268763	0.00289694	0.0018068	0.00418115	0.0970414	0.00145209	0.00916616	0.00199296	0.0198823	0.00214142	1.98829
PromE(800)-GAL35	GD Control	Control	60000/GD	M	2	0.028576	0.0071682	0.00118956	0.0421026	0.00447975	0.00286592	0.0614687	0.547326	0.0096393	0.0425027	0.30052	0.00190163	0.00334575	0.0225331	0.007467	0.010417	0.0164338	0.0651162	0.00923887	0.0487386	0.128944	0.00329139	0.0558126	0.00342018	0.00190706	0.000985927	0.000478832	0.00553566	0.141004	0.00184161	0.00573633	0.0255524	0.00283782	0.00165519	0.0041449	0.0952742	0.00178723	0.00903275	0.00195351	0.0194716	0.00194186	1.7463
PromE(800)-GAL36	GD Control	Control	60000/GD	M	3	0.0273551	0.006557	0.000889876	0.045516	0.00386685	0.00159194	0.0558783	0.539662	0.00452969	0.0379236	0.297708	0.00156522	0.0162729	0.00484461	0.00872097	0.00032807	0.0151484	0.0610329	0.00628639	0.0450885	0.12434	0.00247351	0.0541177	0.00292073	0.000297147	0.00124076	0.000570004	0.00504365	0.140499	0.00184973	0.00519452	0.0256577	0.000923618	0.00161588	0.00412597	0.0939541	0.00136196	0.00895418	0.00202725	0.018398	0.00201229	1.67855
PromE(800)-GAL37	GD Control	Control	60000/GD	M	4	0.0330403	0.00787595	0.00114623	0.0257695	0.00413849	0.0015414	0.065721	0.635412	0.0119534	0.0436118	0.342362	0.00177917	0.0194847	0.00554889	0.00992042	0.000456279	0.0178425	0.0637368	0.0063127	0.048556	0.1346	0.00317634	0.0611619	0.00311536	0.000572568	0.00126658	0.000618944	0.00535401	0.146507	0.00158896	0.00490229	0.0269629	0.0026445	0.00214086	0.00420003	0.0956515	0.00126507	0.00901715	0.0018736	0.0200891	0.00215983	1.87534
PromE(800)-GAL38	GD Control	Control	60000/GD	M	5	0.0346203	0.00853566	0.00115426	0.0258188	0.00487573	0.00144848	0.0673809	0.64007	0.0138848	0.0434832	0.347225	0.00217612	0.0035682	0.0271236	0.00840936	0.0123558	0.0194677	0.0681463	0.00853696	0.0534617	0.142298	0.00402697	0.0627654	0.00373286	0.000738532	0.00199527	0.000969924	0.0059685	0.146058	0.00160215	0.00557322	0.0268685	0.00277807	0.00159625	0.00403904	0.097124	0.00156317	0.00896968	0.00142119	0.0177614	0.0014962	1.93178

## Sheet: J
Line	Allele	Sex	Sample	n-C21 (1)	x-C22:1 (2)	x-C22:1 (3)	n-C22 (4)	2-Me-C22 (6)	NI (7)	9-C23:1 (8)	7-C23:1 (9)	6-C23:1 (10)	5-C23:1 (11)	n-C23 (13)	x,y-C24:2 (16)	3-Me-C23 (17)	7-C24:1 (18)	6-C24:1 (19)	5-C24:1 (21)	n-C24 (22)	2-Me-C24 (25)	6,10-C25:2 (26)	9-C25:1 (27)	7-C25:1 (29)	5-C25:1 (31)	n-C25 (32)	2-Me-C25 (39)	3-Me-C25 (41)	7-C26:1 (42)	6-C26:1/ i (43)	n-C26 (44)	2-Me-C26 (46)	9-C27:1 (47)	7-C27:1 (48)	n-C27 (50)	2-Me-C27 (52)	NI (54)	n-C28 (55)	2-Me-C28 (57)	7-C29:1 (59)	n-C29 (60)	2-Me-C29 (61)	2-Me-C30 (62)	n-C31 (64)	Total CHCs (ug/fly)
w1118	Control	M	1	0.0411776	0.0147927	0.00423672	0.0318383	0.00716626	0.00878264	0.0837677	1.01973	0.00280489	0.0410156	0.194287	0.00491799	0.00484236	0.0282032	0.00996854	0.0123579	0.00906414	0.118795	0.0423633	0.0305822	0.0896388	0.00140467	0.0301762	0.00630272	0.00143464	0.00085252	0.000353545	0.00225673	0.227952	0.00214176	0.00513788	0.00893973	0.00327356	0.00463499	0.00113228	0.0866565	0.00123683	0.00213939	0.000715603	0.0108952	0.000927862	2.19944
w1118	Control	M	2	0.0362979	0.014996	0.00389906	0.0286688	0.00629958	0.00754077	0.0921976	1.0274	0.00339392	0.0450311	0.178904	0.00457644	0.00490721	0.0309992	0.0104236	0.0124022	0.00808481	0.105526	0.0451151	0.0337625	0.10081	0.000746022	0.0266681	0.00560209	0.00122834	0.000764037	0.000310431	0.00182089	0.198126	0.00182497	0.00487178	0.00774368	0.00312348	0.00147446	0.000766452	0.0858129	0.0016286	0.00175591	0.00057367	0.00900446	0.000761628	2.15696
w1118	Control	M	3	0.0426303	0.0164816	0.00429789	0.035001	0.00732751	0.00963915	0.0985603	1.11962	0.0033501	0.0465755	0.205887	0.00525237	0.00525391	0.0330055	0.0115304	0.0144014	0.00948445	0.122585	0.0464149	0.0354969	0.109509	0.000829274	0.0313736	0.00678528	0.00151864	0.000954759	0.000335719	0.00226703	0.243705	0.00223672	0.00555938	0.00904867	0.00354394	0.00172758	0.000950458	0.0889187	0.00130925	0.00199835	0.000578152	0.0091512	0.000854105	2.39706
w1118	Control	M	4	0.0460242	0.0140518	0.00398382	0.0325075	0.00616295	0.00635736	0.0732397	0.950821	0.00137039	0.0420534	0.185911	0.00395148	0.00377326	0.0251371	0.00871258	0.0106954	0.00798831	0.0991396	0.0295768	0.0227469	0.0822882	0.000596404	0.0272464	0.00492978	0.00134596	0.000648142	0.000612951	0.00198856	0.18581	0.00126813	0.00268681	0.00893994	0.00277501	0.001786	0.000832635	0.0778973	0.000796627	0.00212265	0.000765162	0.00777306	0.000817238	1.98848
w1118	Control	M	5	0.0460087	0.0145454	0.00368847	0.0310006	0.00652158	0.00747594	0.0762357	0.946223	0.00812747	0.0431239	0.192374	0.00445805	0.00385767	0.0232525	0.00903848	0.0100225	0.00767431	0.105801	0.0315105	0.0235684	0.0824392	0.000606381	0.0276292	0.00536696	0.00125527	0.000571693	0.000651245	0.00177135	0.199991	0.000952416	0.00255502	0.00804657	0.00302459	0.00146369	0.000658089	0.0763526	0.000643992	0.00170595	0.000527592	0.00751531	0.000748098	2.01925
CG10097	e00276	M	1	0.017288	0.00870807	0.00189448	0.0251596	0.00349259	0.00753972	0.0607429	0.678144	0.00896578	0.0267351	0.203136	0.00291378	0.00406604	0.0183898	0.00839907	0.0076438	0.00996005	0.0669613	0.0424767	0.0475577	0.103775	0.000656207	0.0462989	0.00386522	0.000735302	0.000392716	0.000337129	0.00331705	0.174307	0.00183455	0.00386392	0.0215368	0.0045921	0.00133417	0.00178243	0.154206	0.00253374	0.00797699	0.00108691	0.0301717	0.00294409	1.81878
CG10097	e00276	M	2	0.0220729	0.0110892	0.00217517	0.0221175	0.00503381	0.00993157	0.0727169	0.809534	0.00969638	0.0320831	0.203778	0.003687	0.00467091	0.0168917	0.00906288	0.00728776	0.00738095	0.0749098	0.0493882	0.0513793	0.0992664	0.000575159	0.0414534	0.00436132	0.00116904	0.000403655	0.000327065	0.00244515	0.184137	0.00182908	0.00329872	0.0200007	0.0047763	0.00131942	0.00140563	0.153618	0.00260353	0.00702658	0.00103332	0.0251792	0.00231036	1.98507
CG10097	e00276	M	3	0.0197403	0.00839121	0.00187987	0.0217843	0.00357418	0.00565841	0.0544661	0.620766	0.00683973	0.0256148	0.183396	0.00260269	0.00342242	0.0147427	0.00684168	0.0065421	0.00751433	0.0599051	0.0317472	0.0367599	0.0720507	0.000484744	0.0374648	0.00333549	0.0011018	0.000321002	0.000263858	0.00234516	0.146868	0.00166413	0.00254089	0.0163224	0.00372474	0.00131538	0.00119265	0.116663	0.00195589	0.00521816	0.00100217	0.0171662	0.00197909	1.55826
CG10097	e00276	M	4	0.0281737	0.010865	0.00280801	0.0340749	0.00376004	0.00597216	0.0643039	0.807378	0.00912033	0.037131	0.241638	0.00285388	0.00408709	0.0217435	0.00873844	0.00865326	0.0111598	0.0621779	0.0363641	0.041896	0.098708	0.000695993	0.0488736	0.00342326	0.0011772	0.000588676	0.000383664	0.00358491	0.153331	0.0023195	0.003568	0.0238206	0.00399824	0.00134784	0.00175581	0.12925	0.00327406	0.0076126	0.00102234	0.0207166	0.00258611	1.95609
CG10097	e00276	M	5	0.0162438	0.00731191	0.00159826	0.0183442	0.00308684	0.00469044	0.0458422	0.546838	0.00608355	0.020971	0.162041	0.00239724	0.00298186	0.0122249	0.00604157	0.00521819	0.00667757	0.0576365	0.0273945	0.0323401	0.0635315	0.000369637	0.034382	0.0031523	0.000757021	0.000209734	0.00020832	0.00215062	0.14477	0.00156599	0.00219726	0.0148144	0.00366193	0.00133765	0.00119523	0.117816	0.00200292	0.00538902	0.00108622	0.0190567	0.00226223	1.40894
