# Supplementary figures and images for: Genetic architecture of natural variation in cuticular hydrocarbon composition in Drosophila melanogaster
Source: eLife journal article supplement (doi:10.7554/elife.09861), 2015-11-14

*PromE(800)-GAL4 x UAS-CG9801*

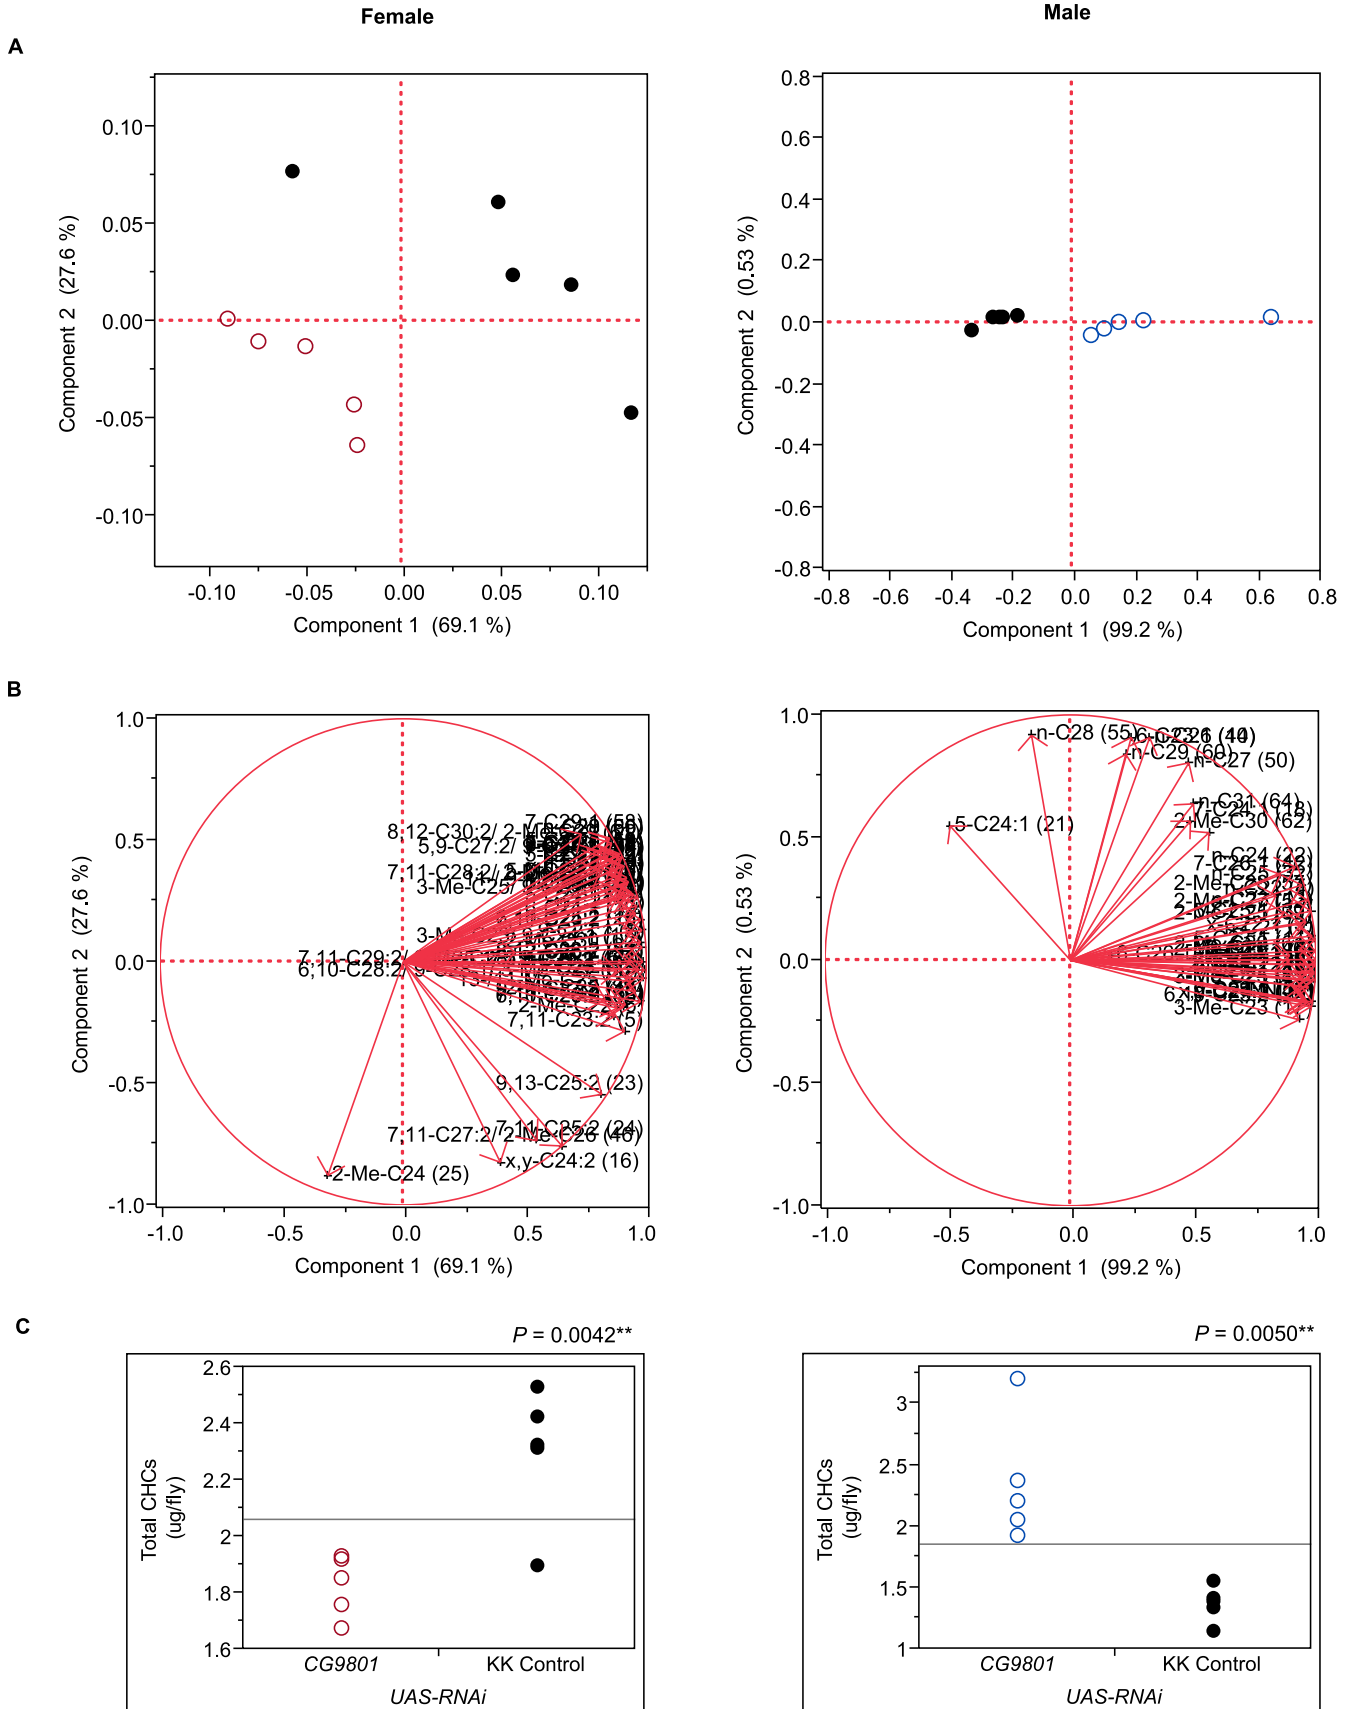

Supplement: supp [file elife-09861-supp-v2.zip]

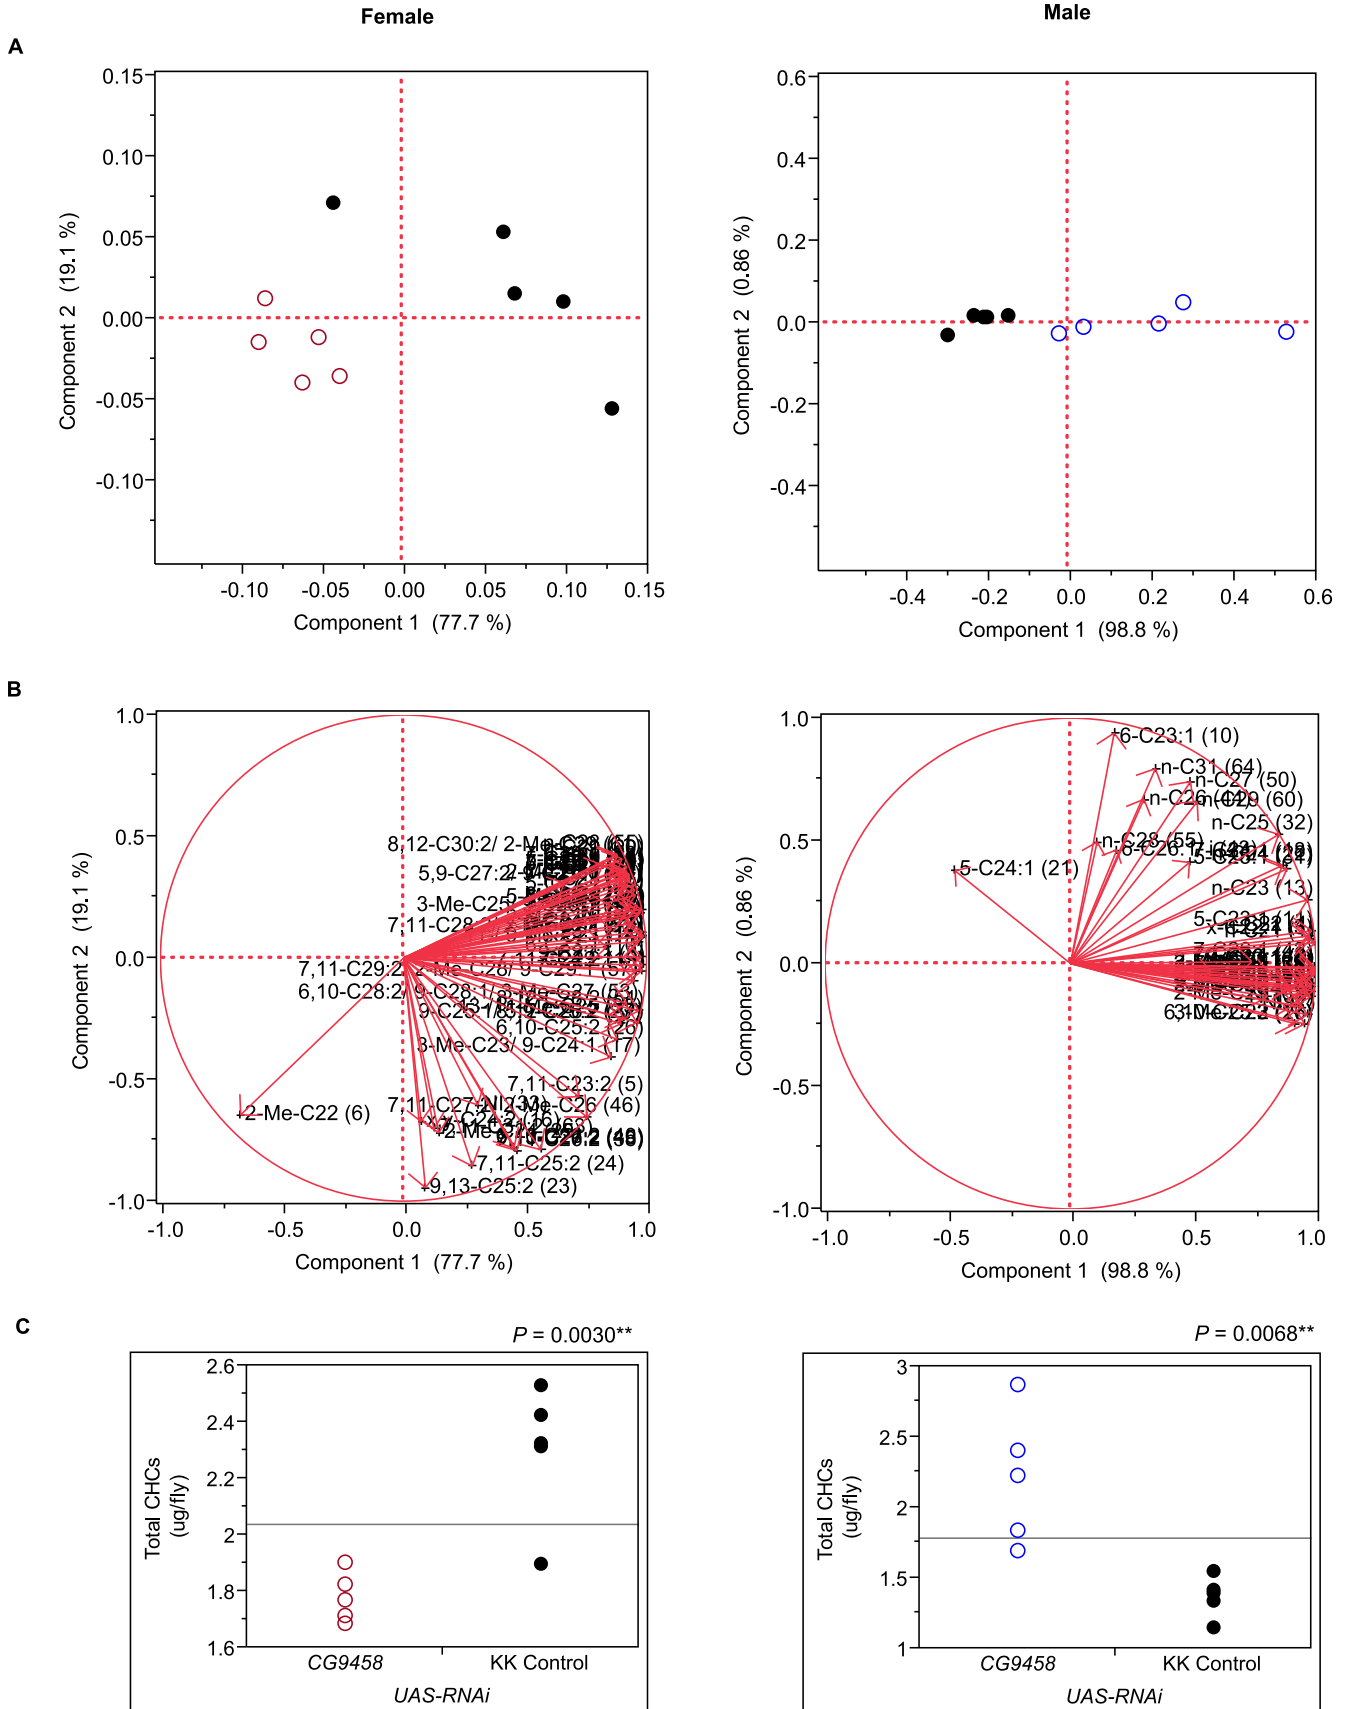

Supplement: supp [file elife-09861-supp-v2.zip]

**PromE(800)-GAL4 x UAS-Cyp49a1**

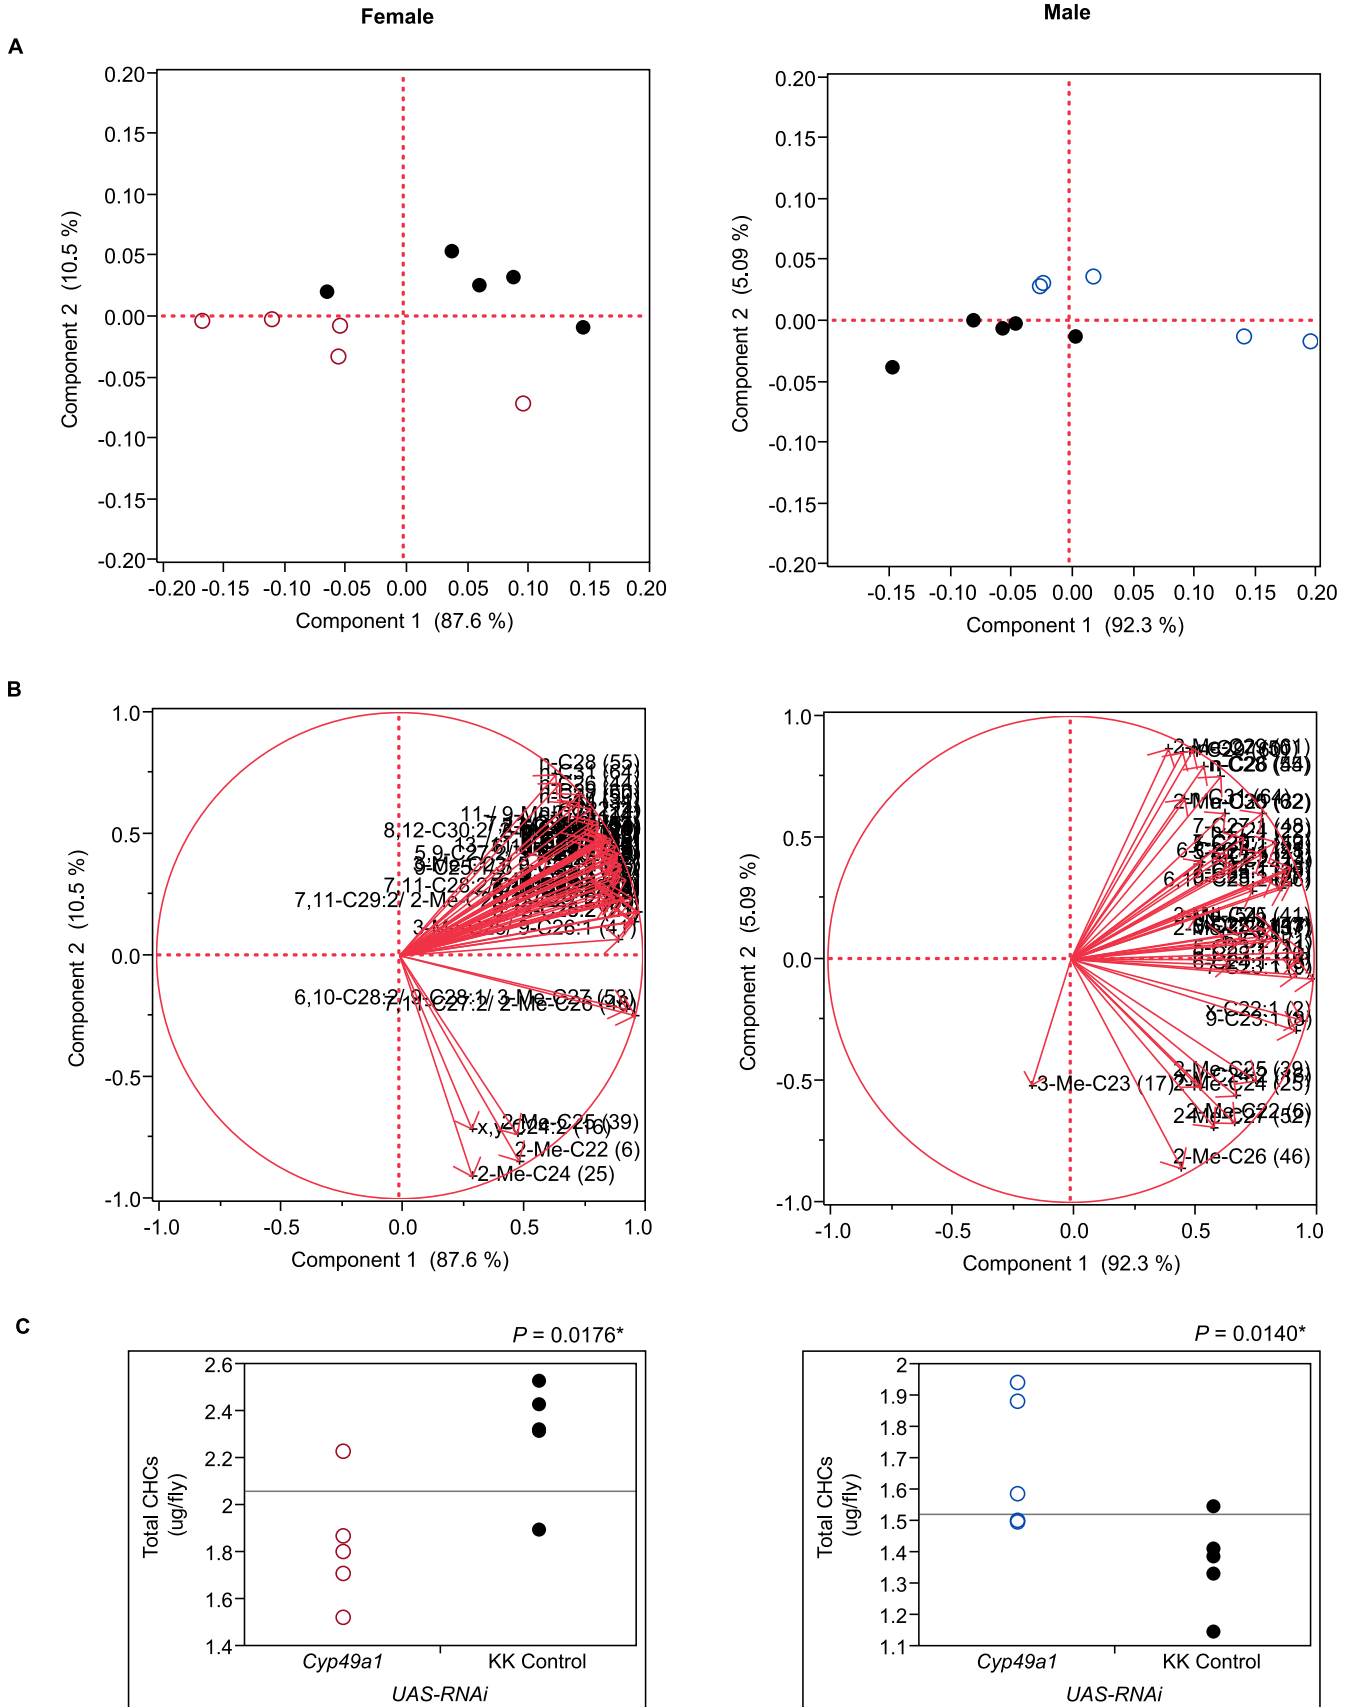

Supplement: supp [file elife-09861-supp-v2.zip]

A

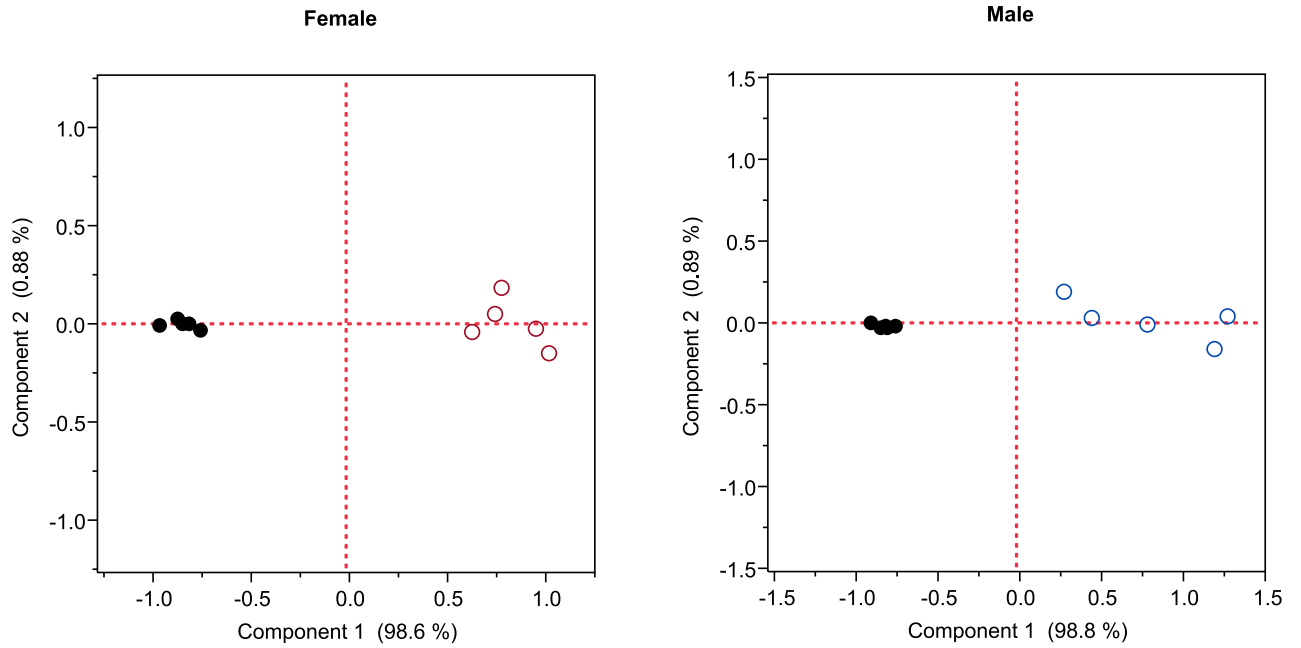

B

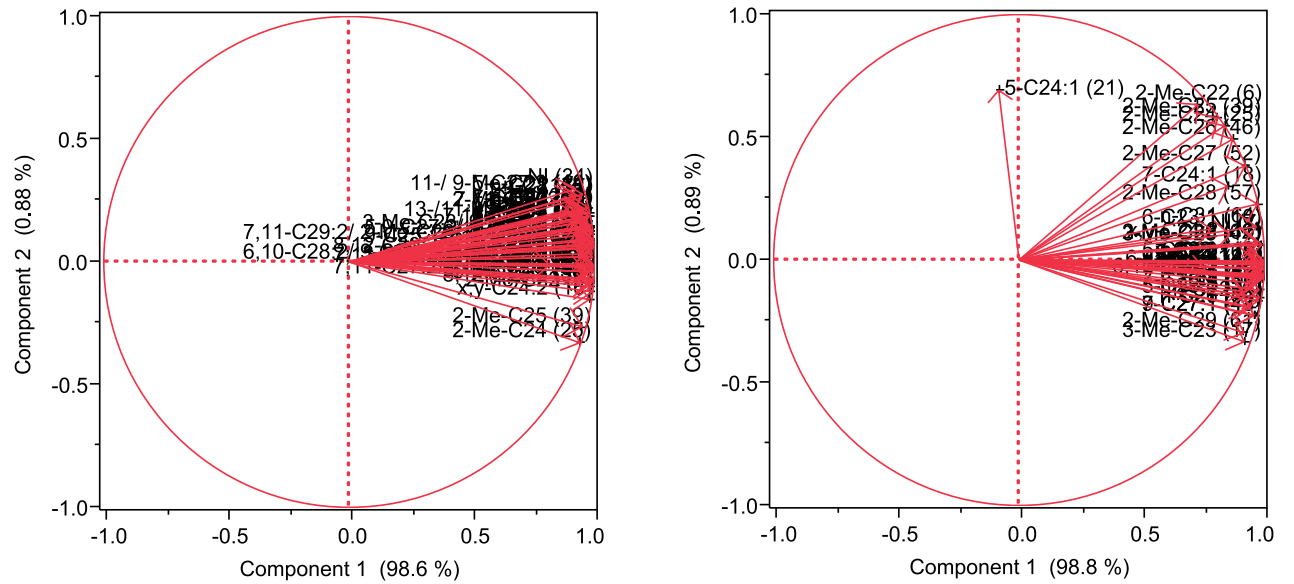

C

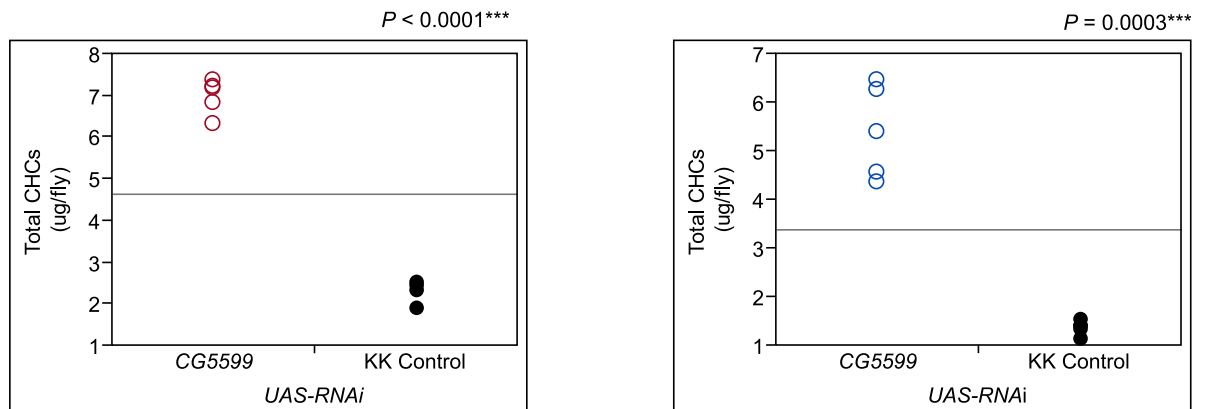

Supplement: supp [file elife-09861-supp-v2.zip]

*PromE(800)-GAL4 x UAS-Irc*

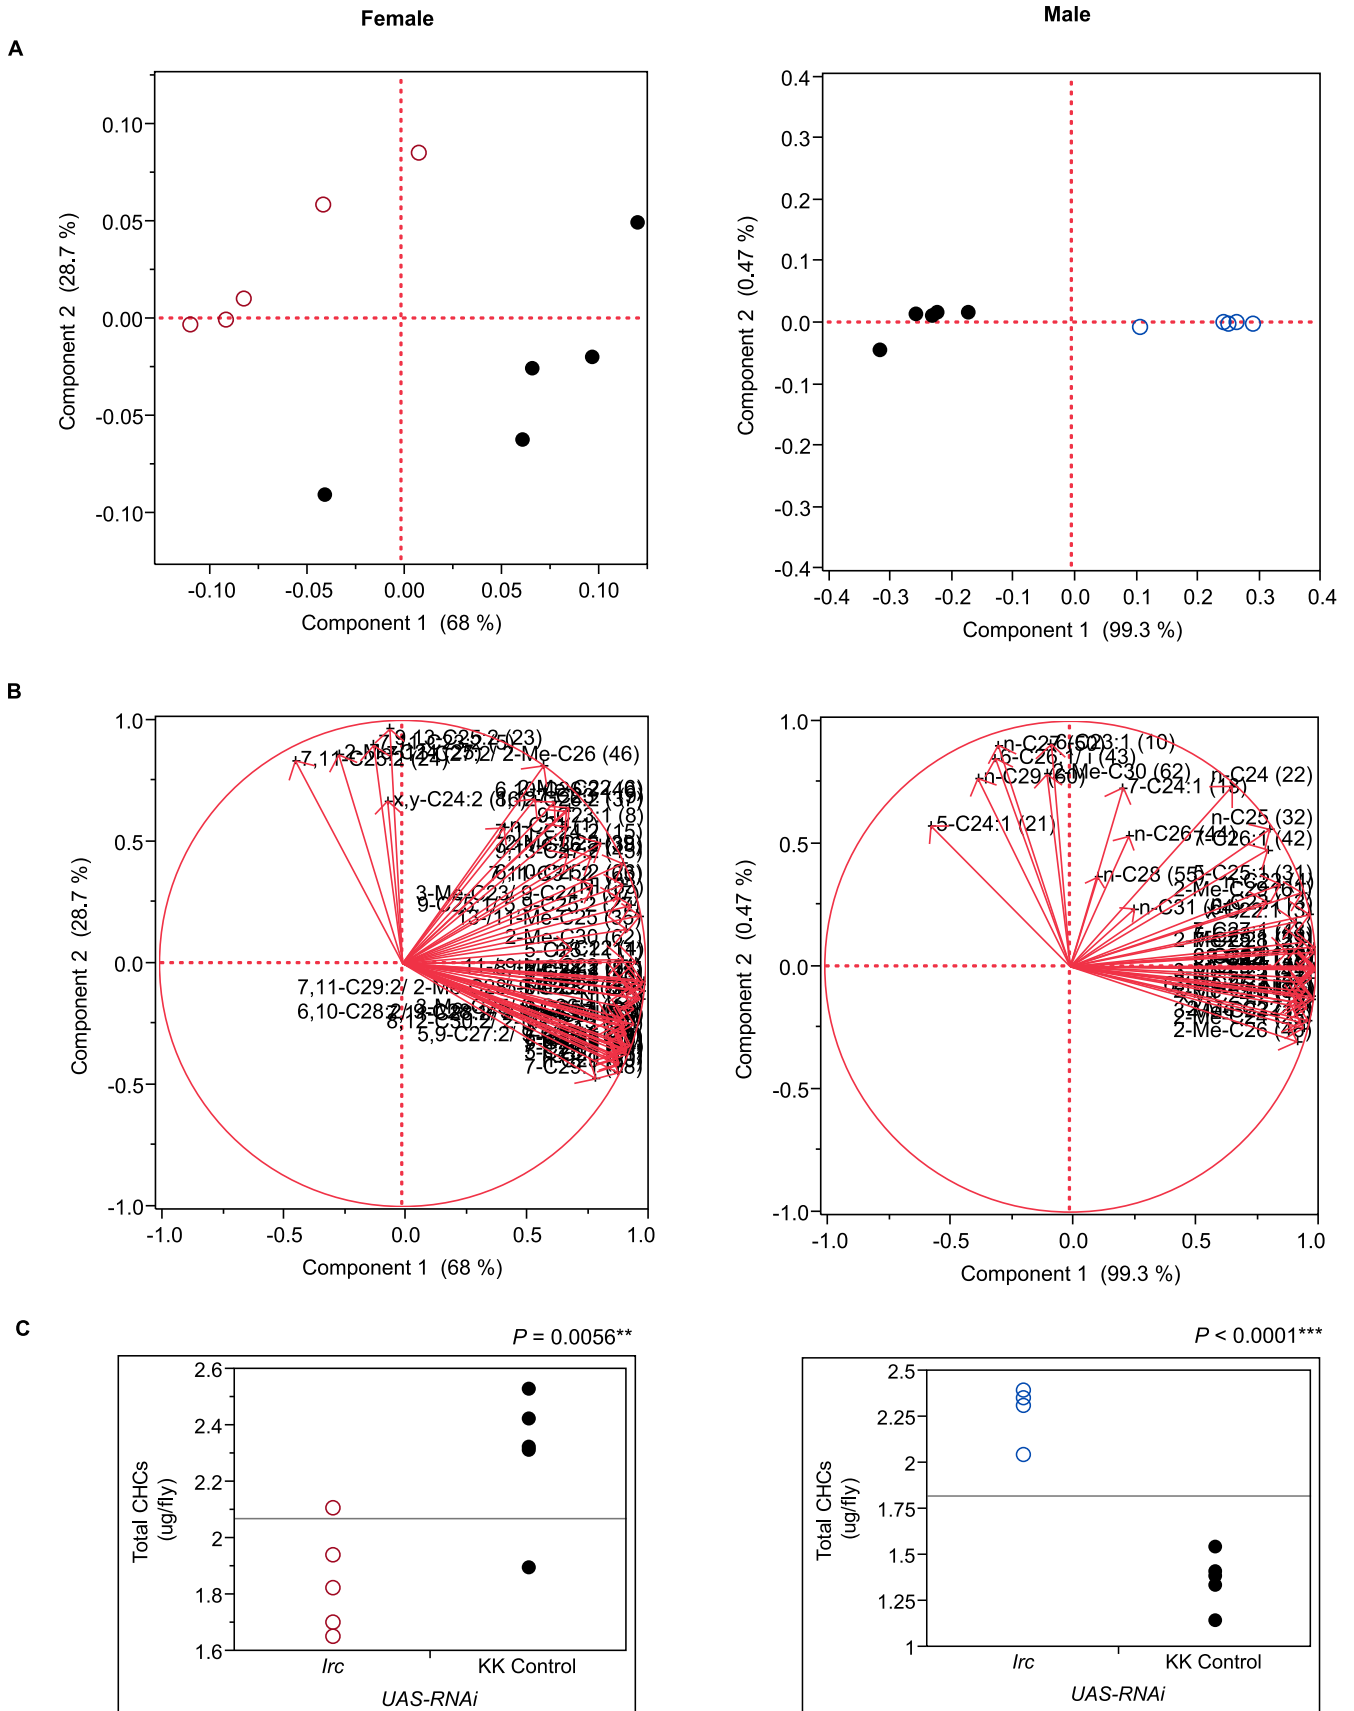

Supplement: supp [file elife-09861-supp-v2.zip]

# Exelixis Mutant *CG10097*

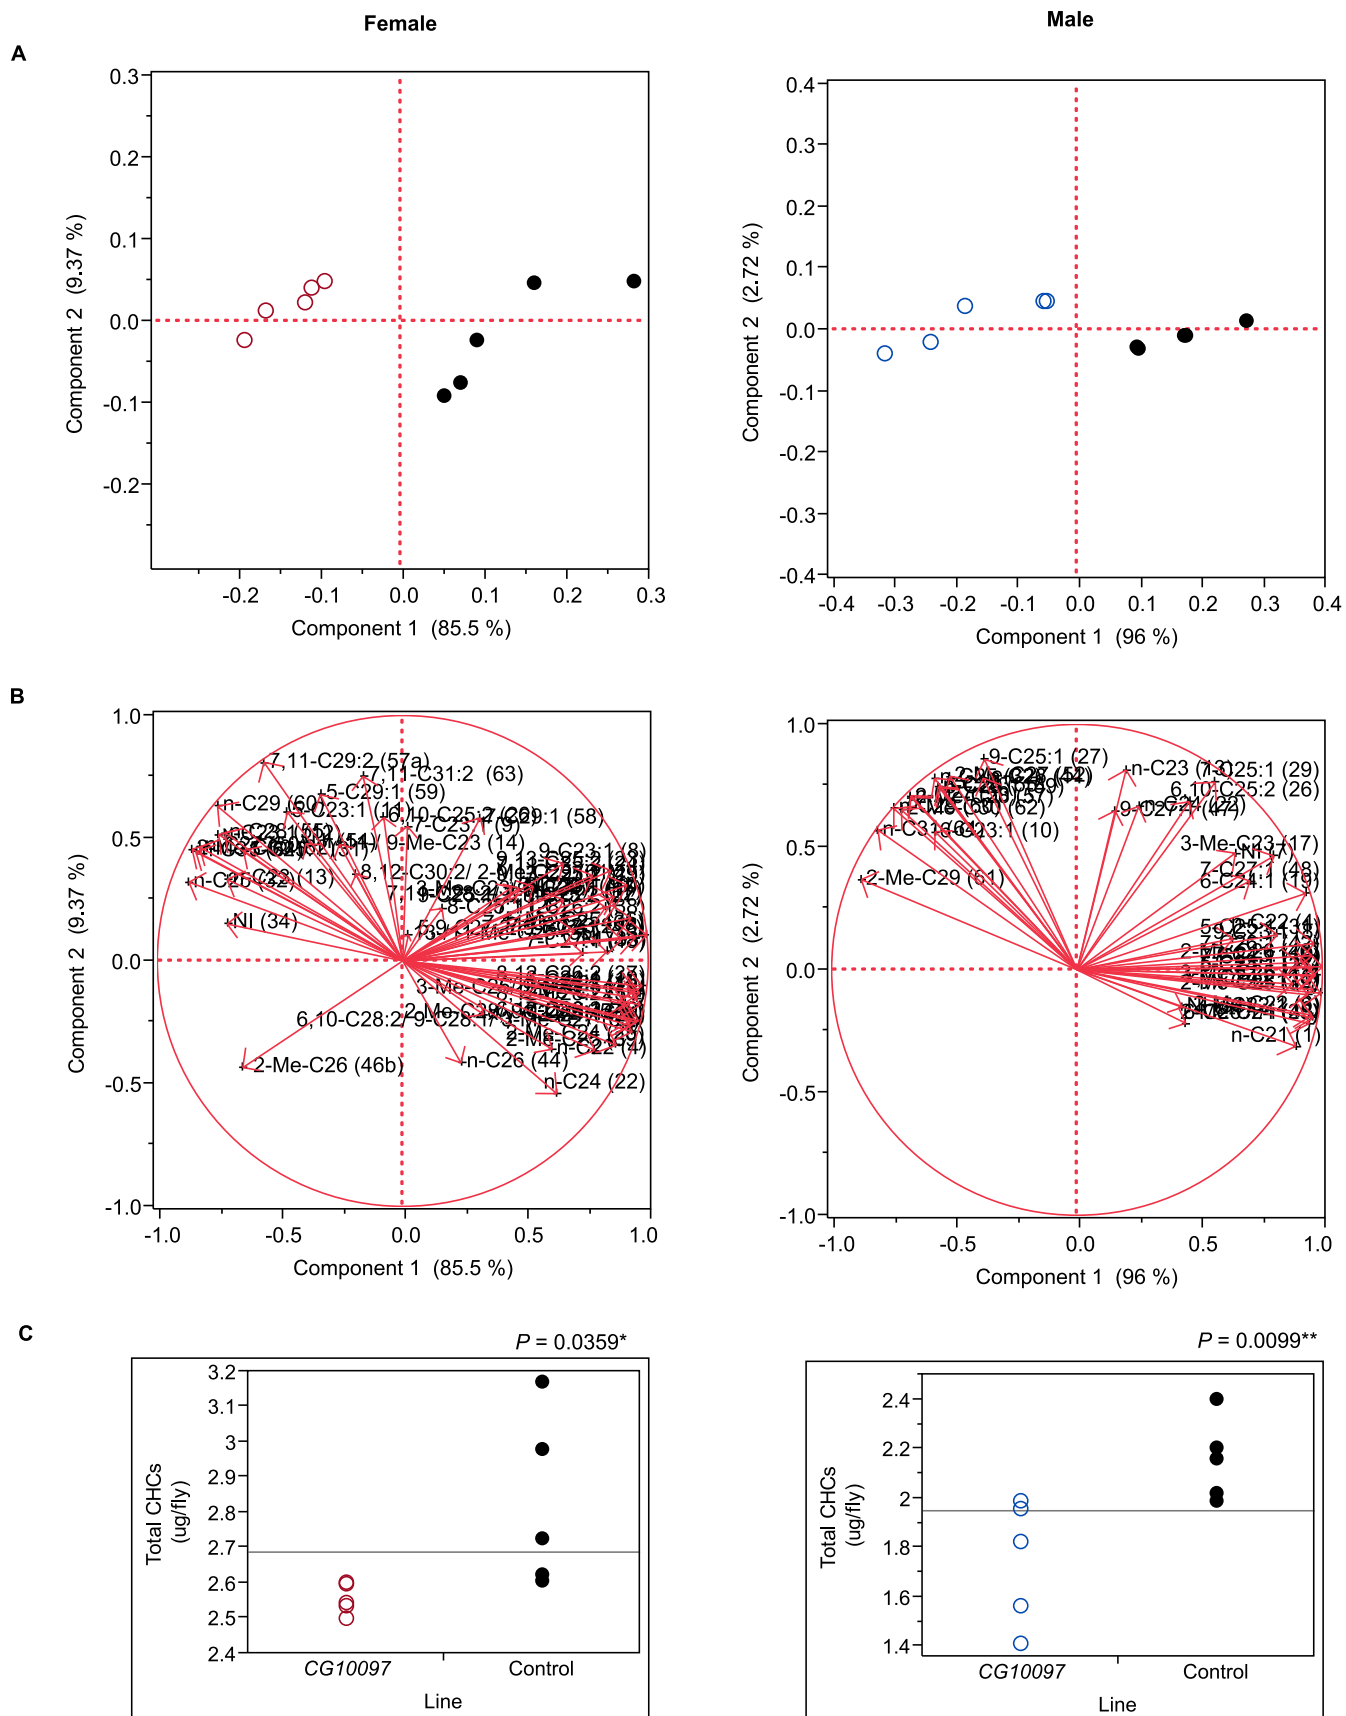

Supplement: supp [file elife-09861-supp-v2.zip]

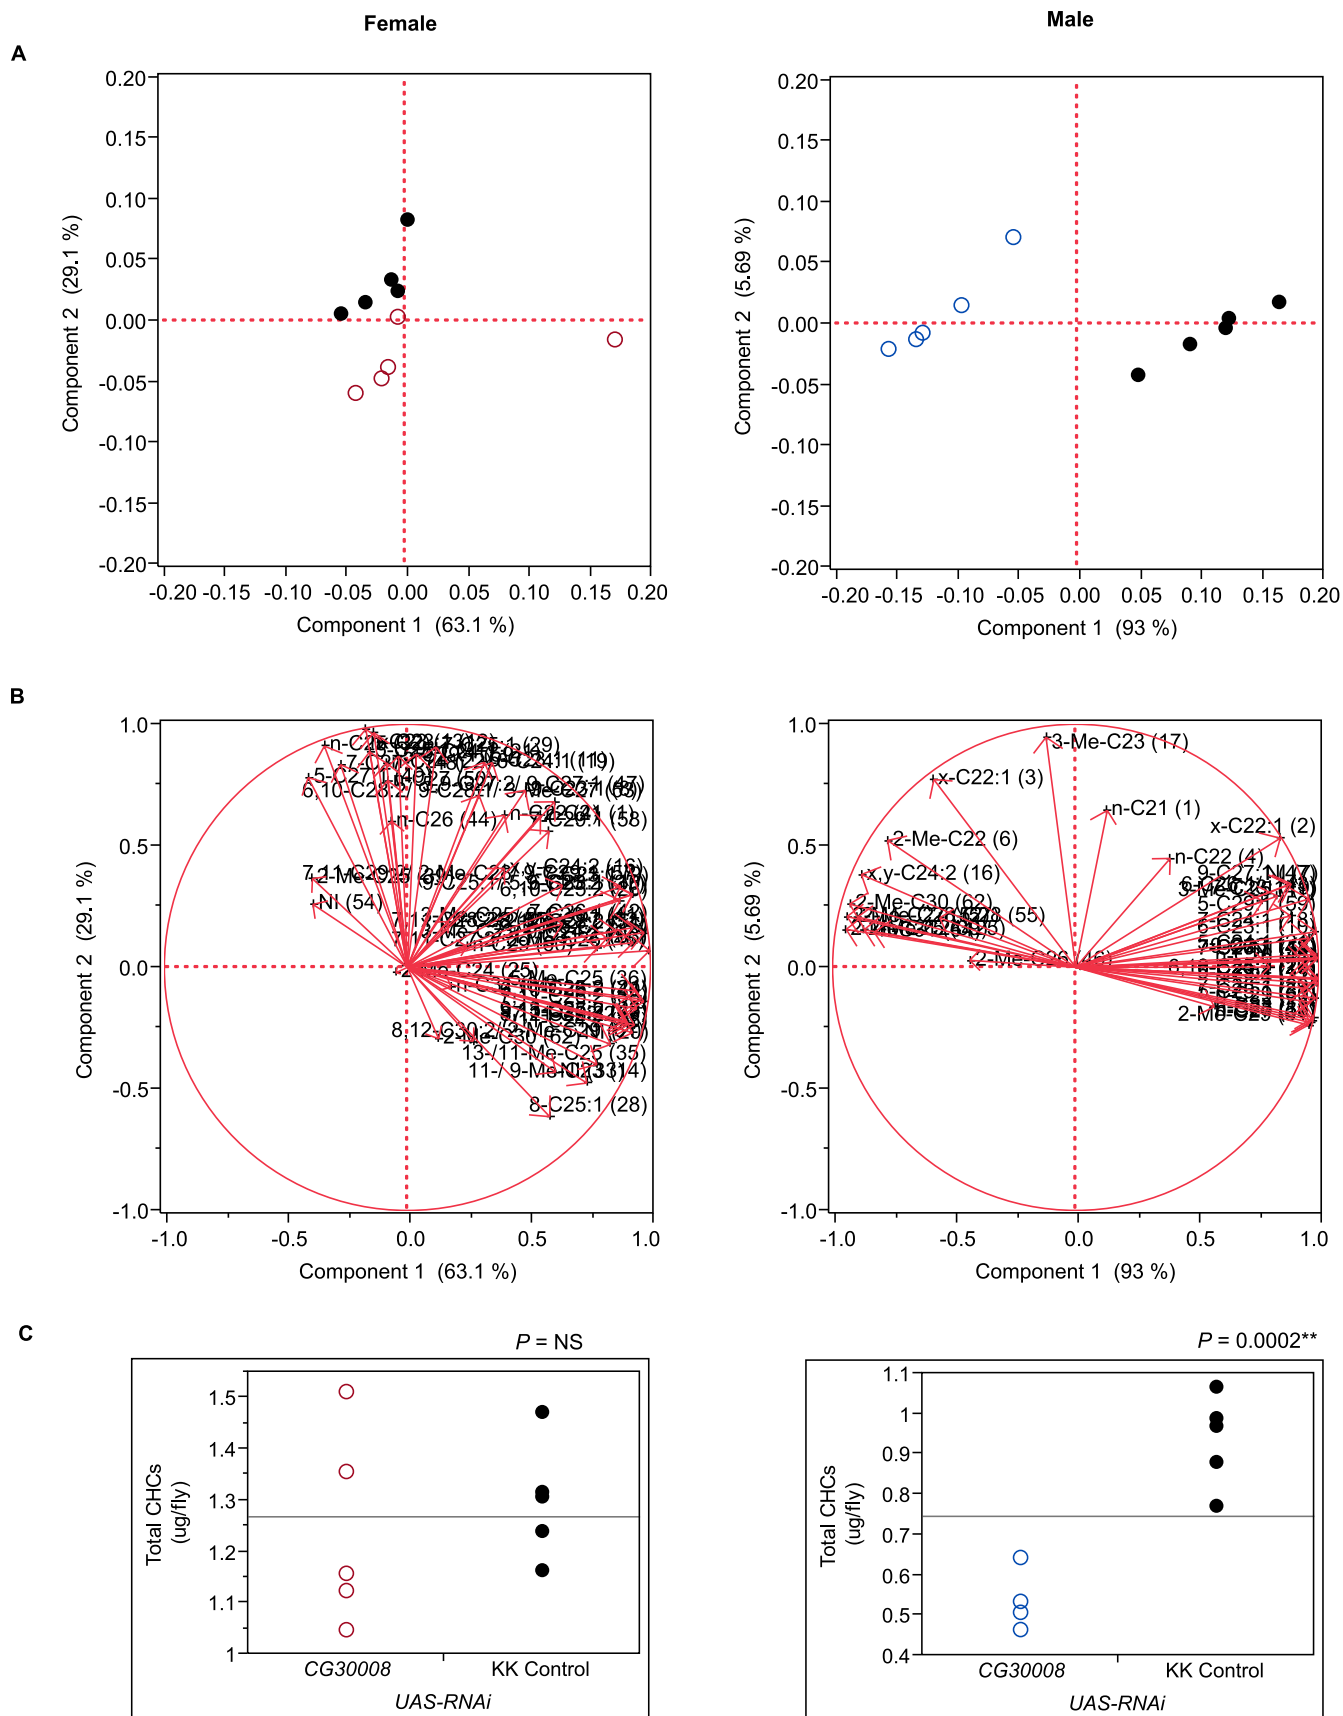

Supplement: supp [file elife-09861-supp-v2.zip]

**PromE(800)-GAL4 x UAS-CG8680**

**A**

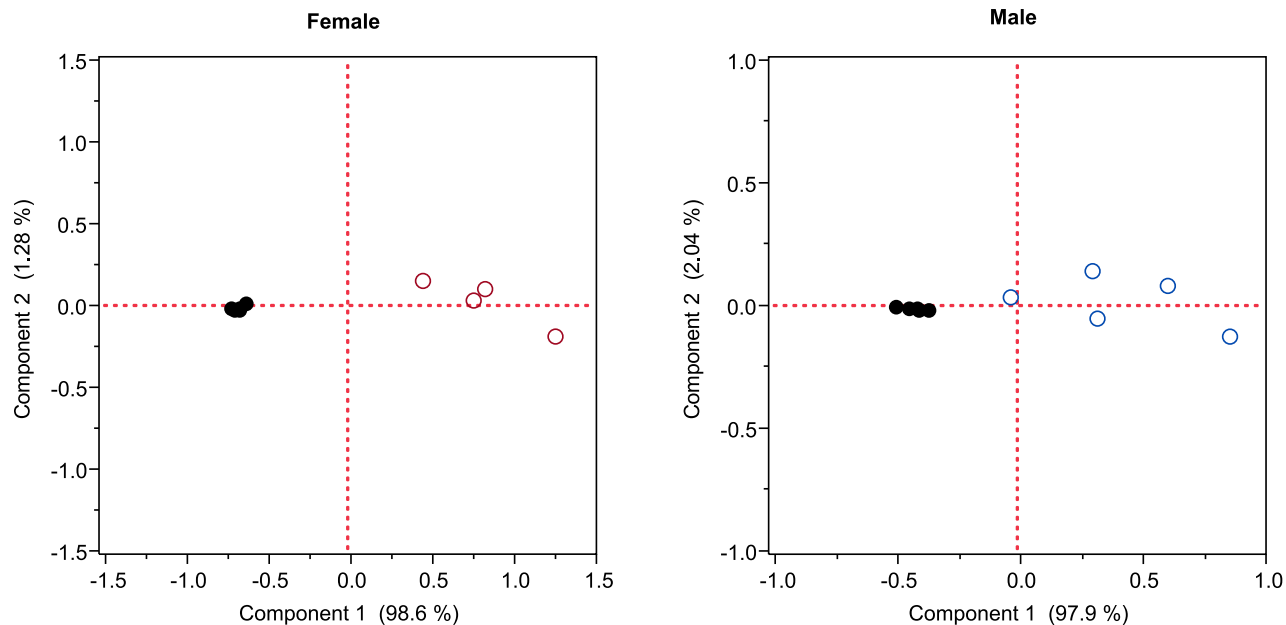

**B**

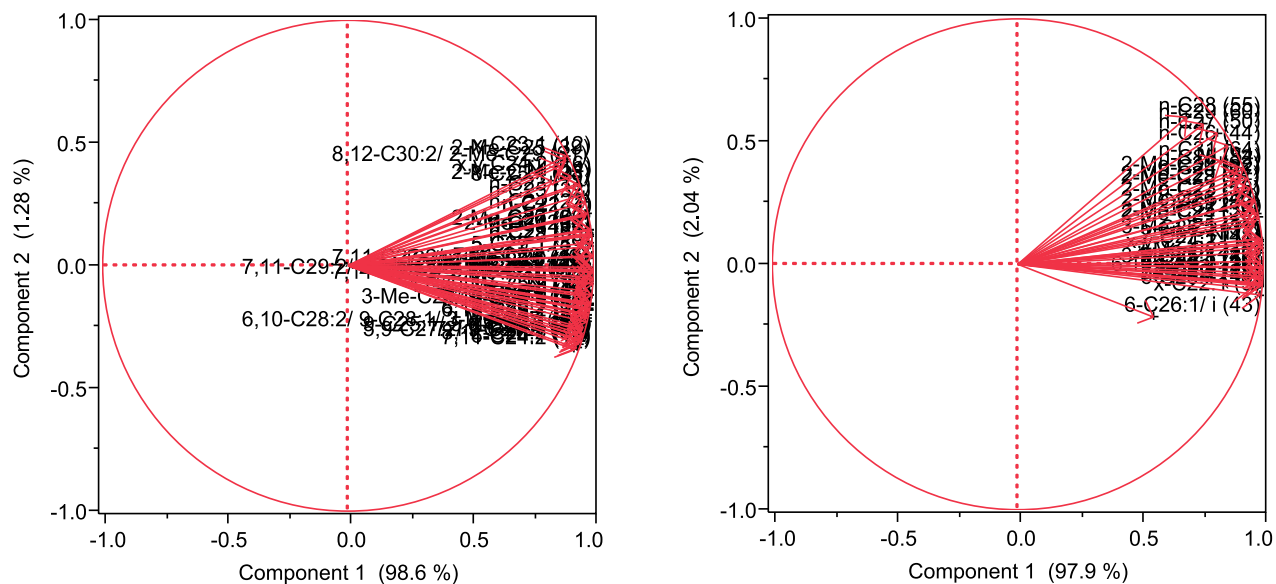

**C**

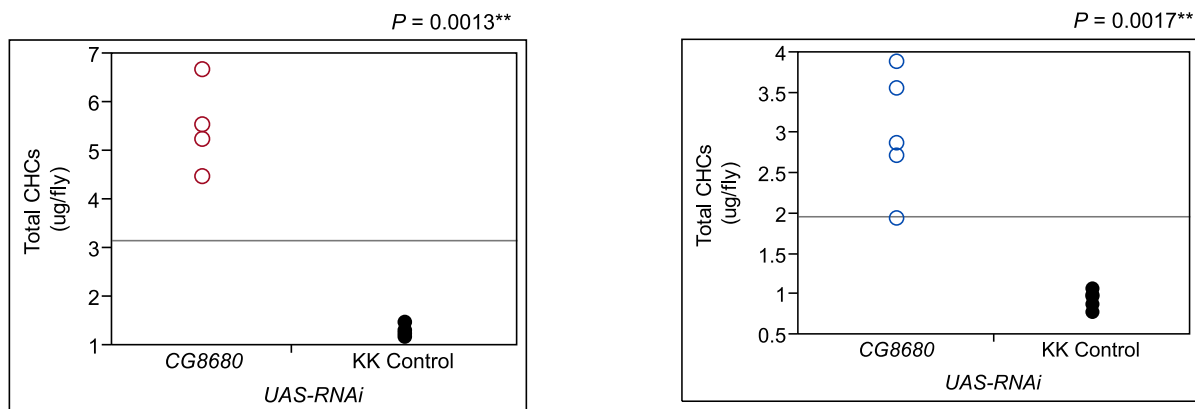

Supplement: supp [file elife-09861-supp-v2.zip]

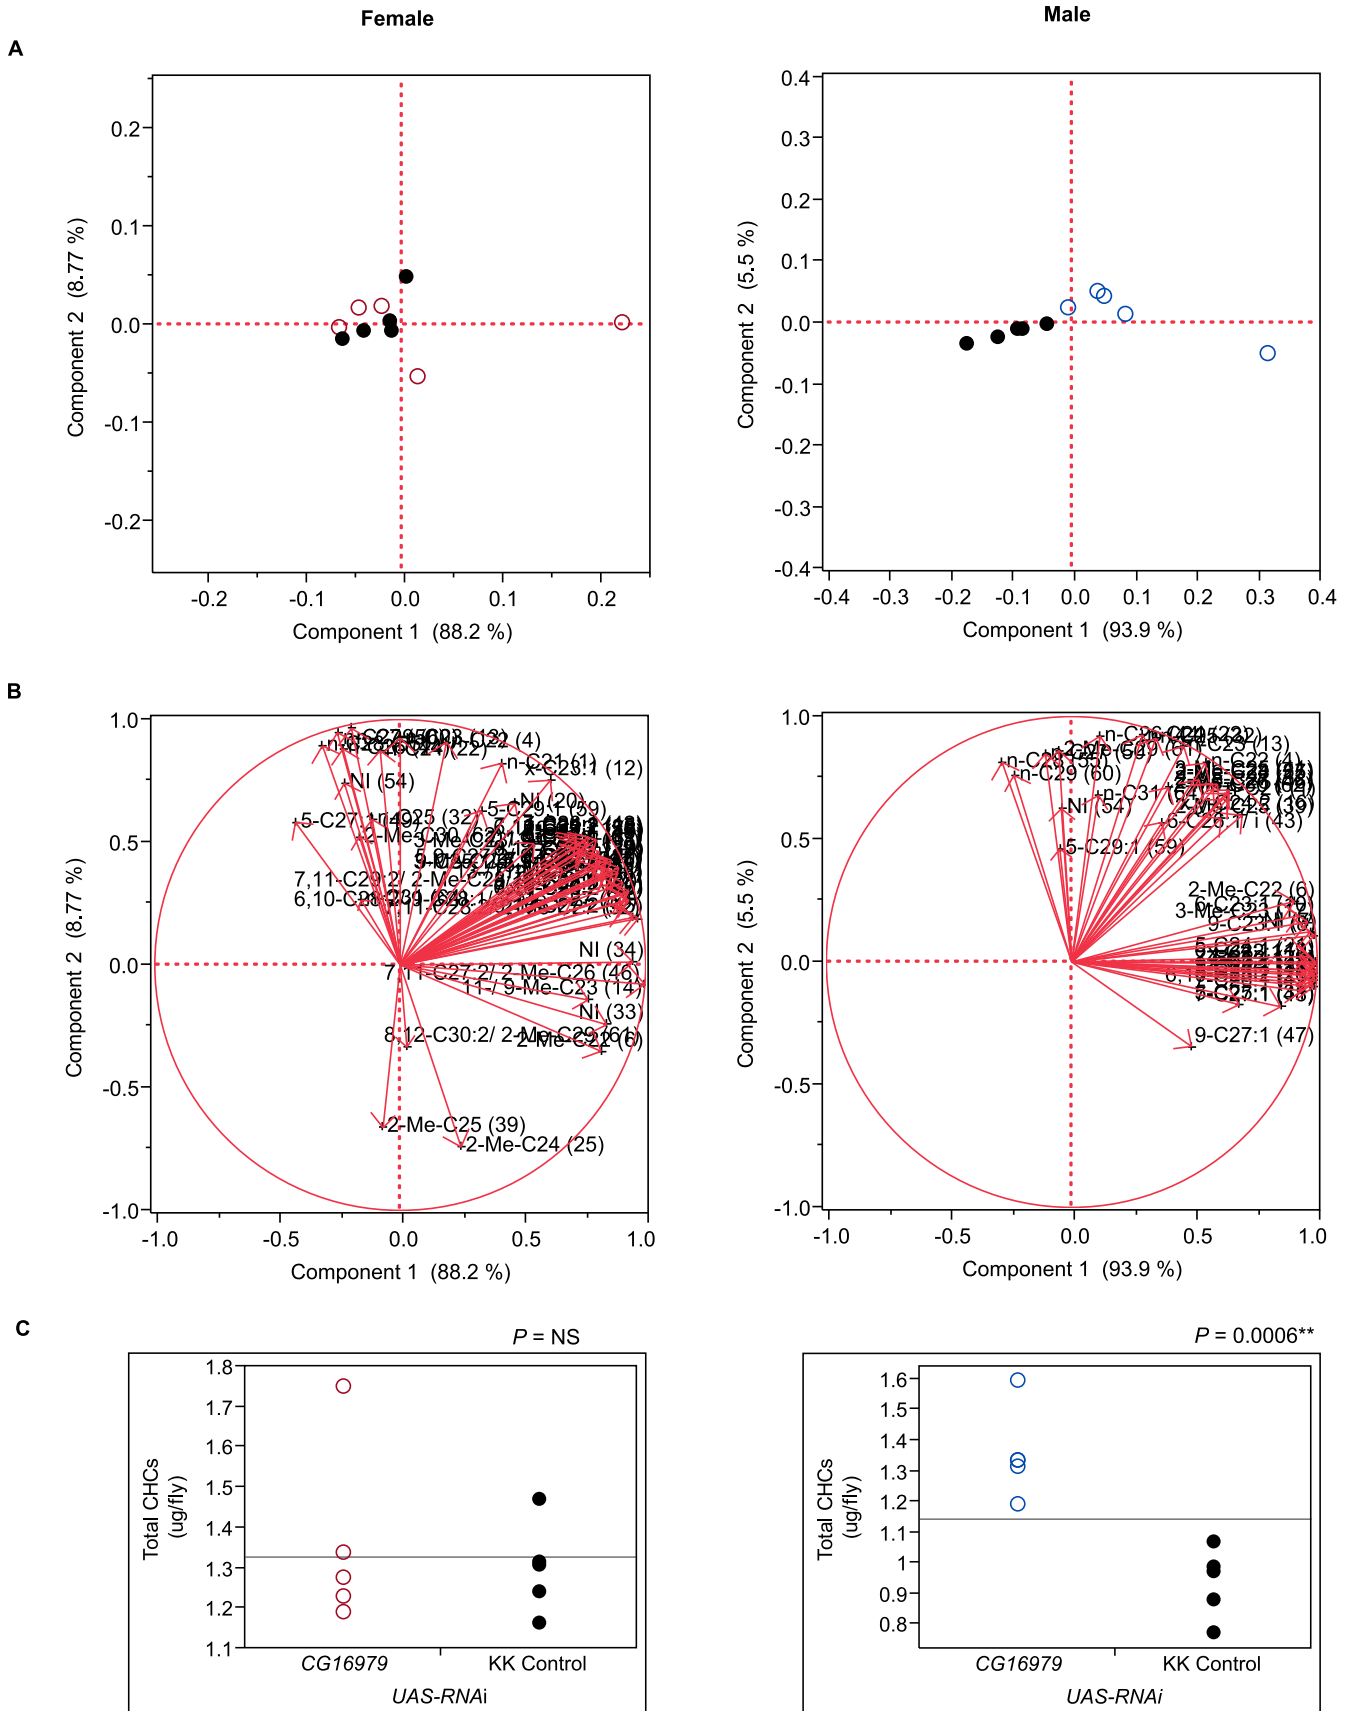

Supplement: supp [file elife-09861-supp-v2.zip]

*PromE(800)-GAL4 x UAS-PHGPx*

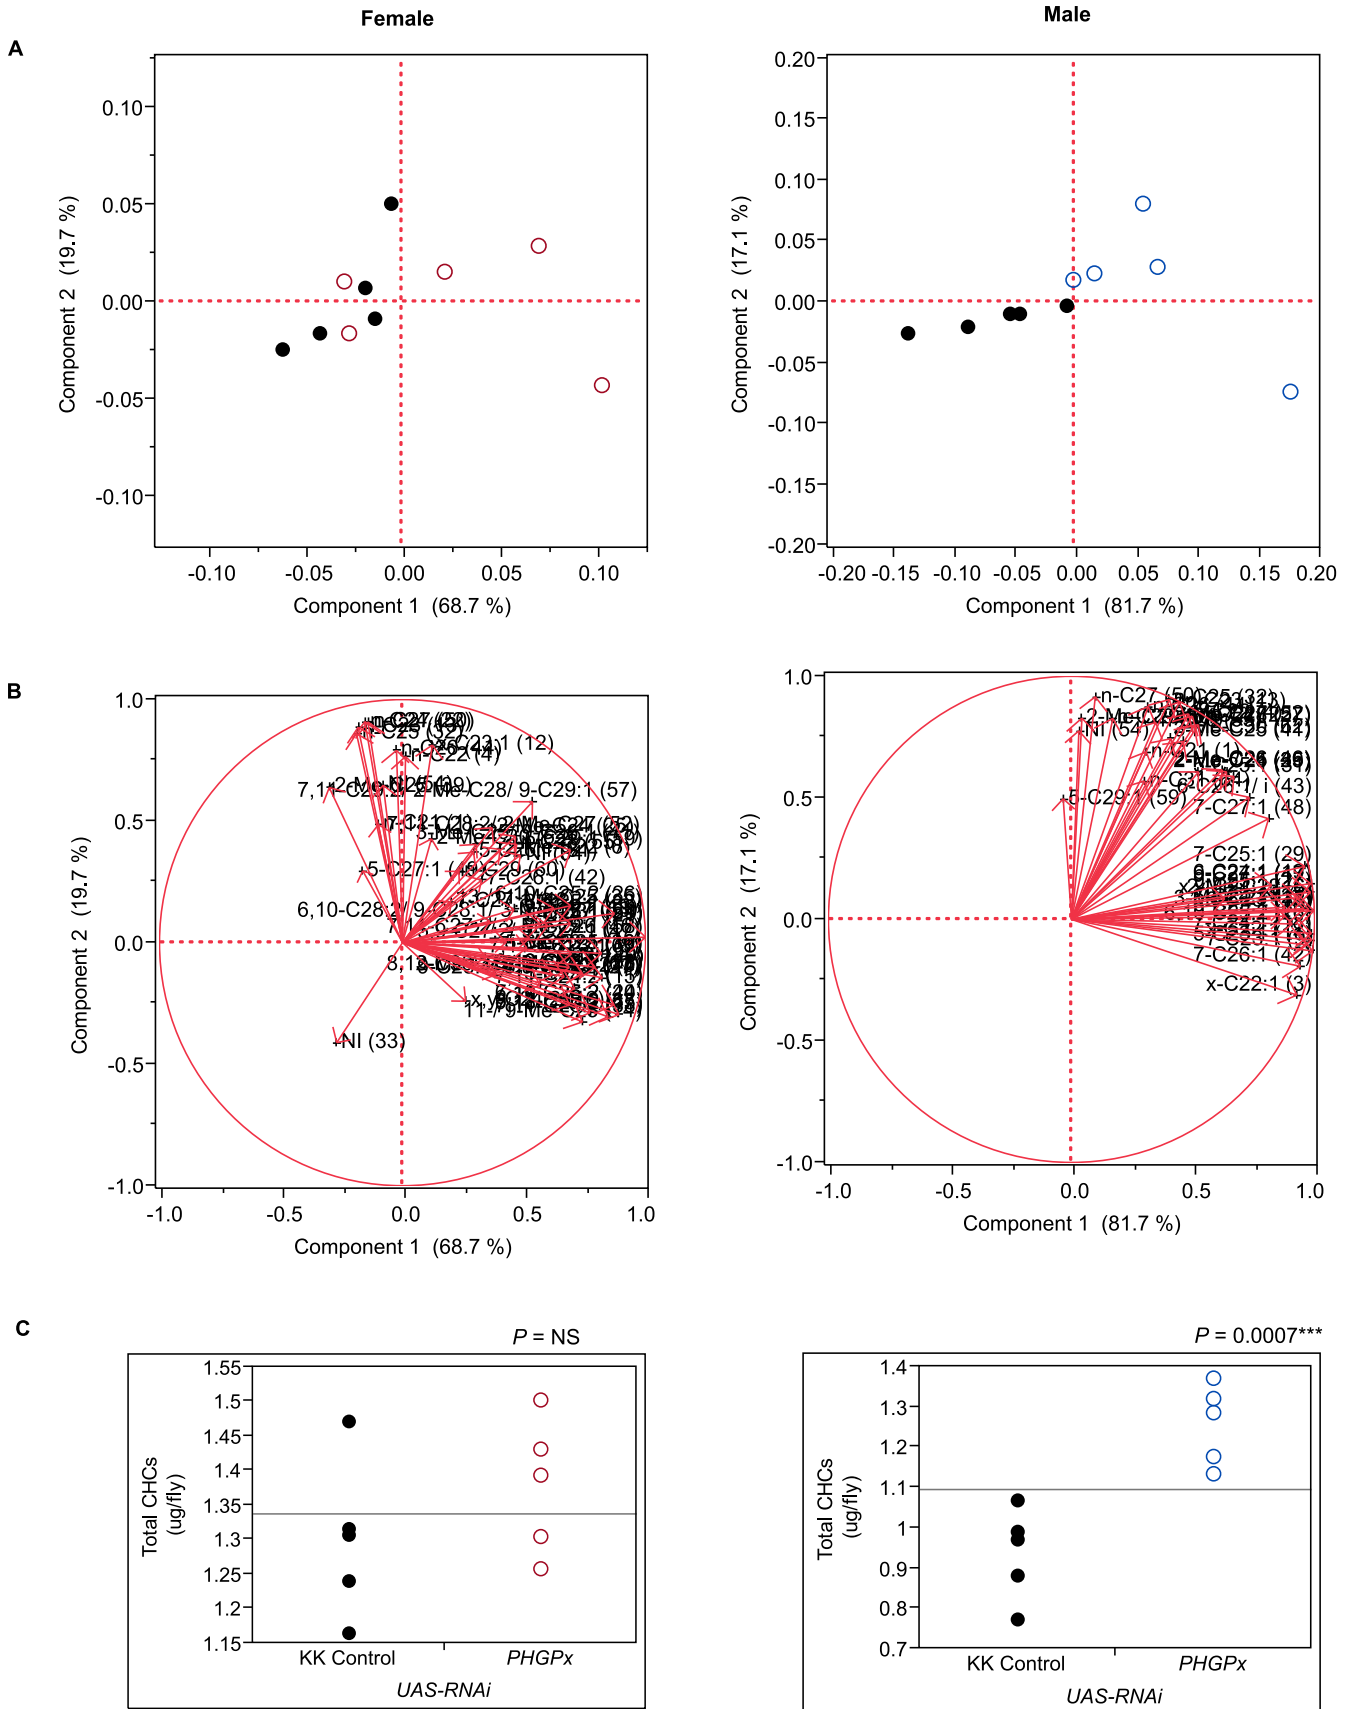

Supplement: supp [file elife-09861-supp-v2.zip]

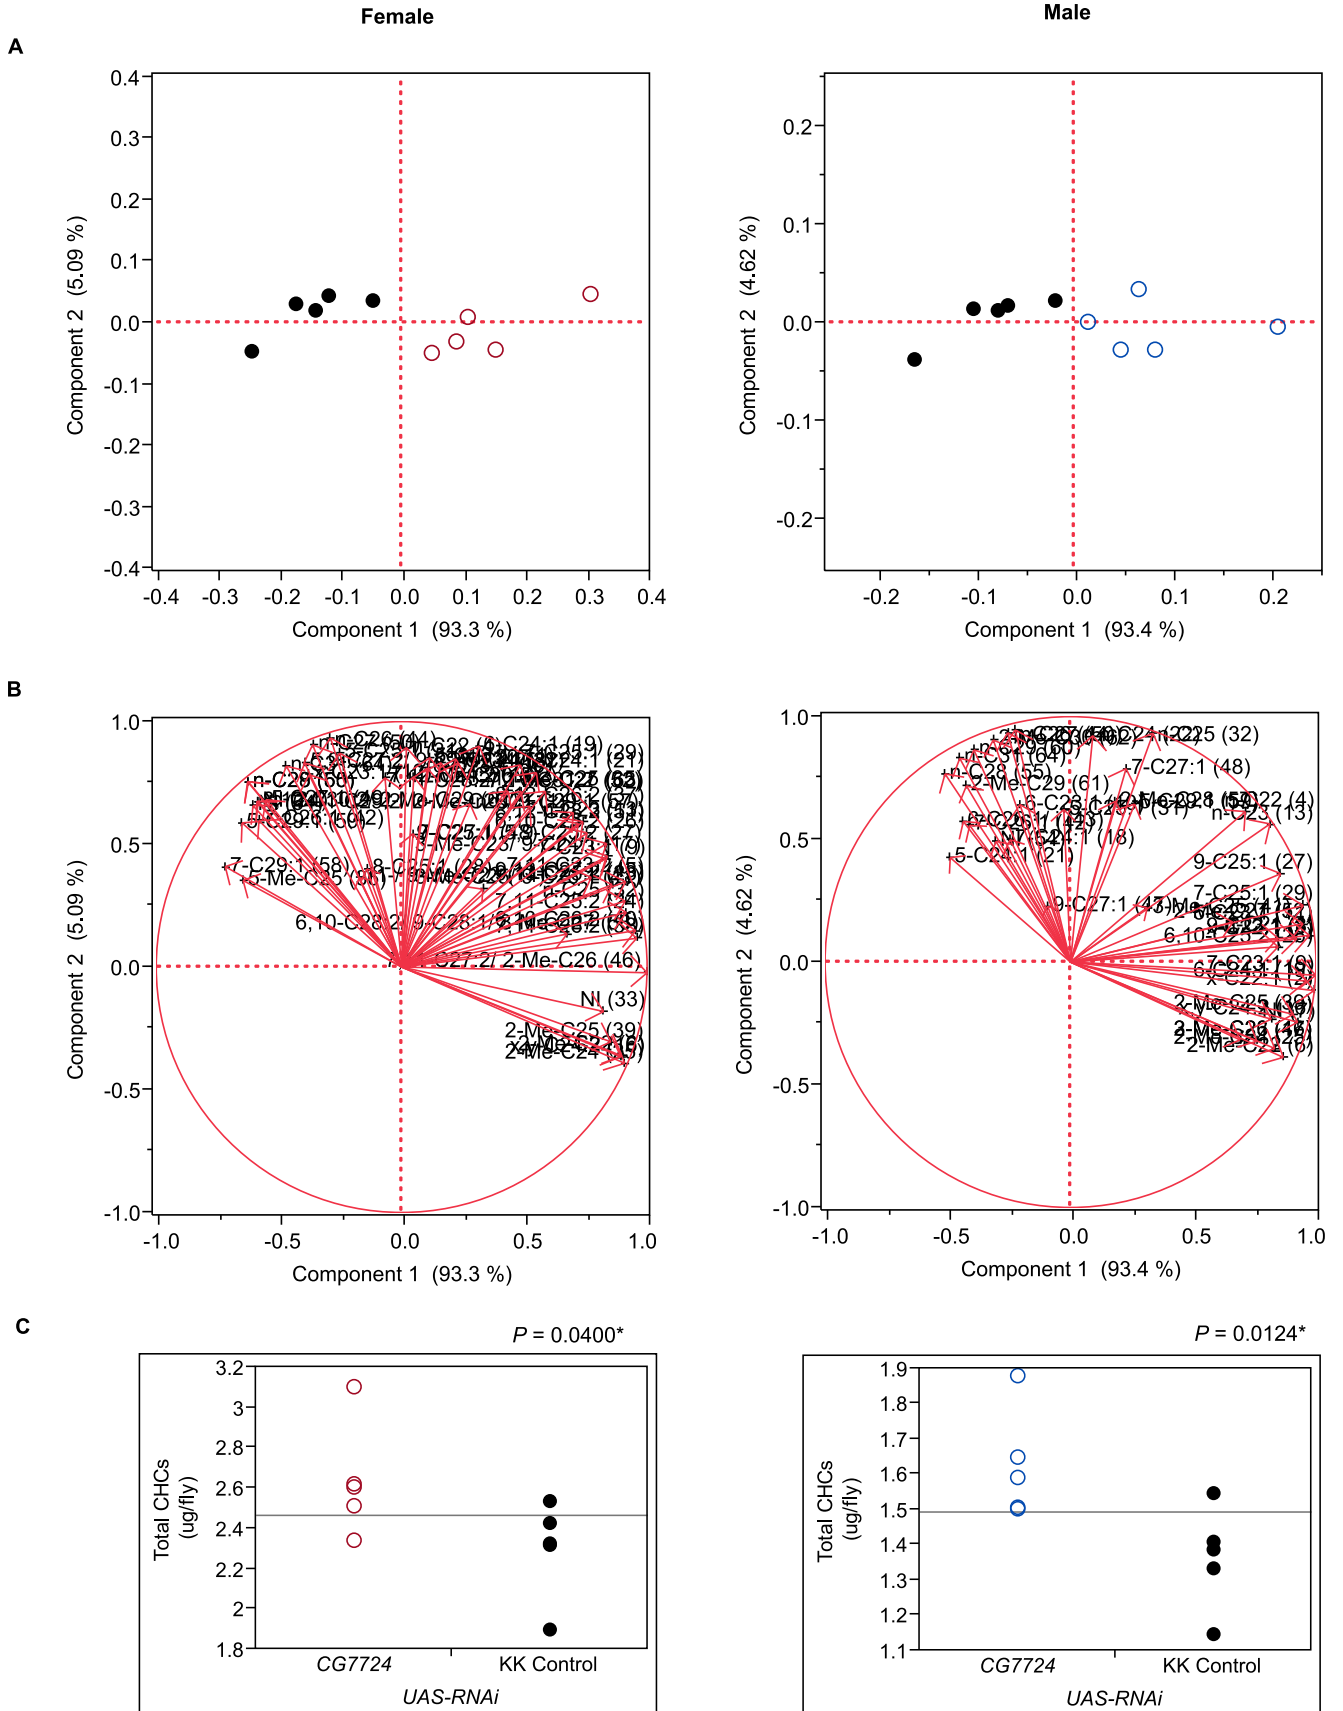

Supplement: supp [file elife-09861-supp-v2.zip]

**PromE(800)-GAL4 x UAS-CG18609**

**A**

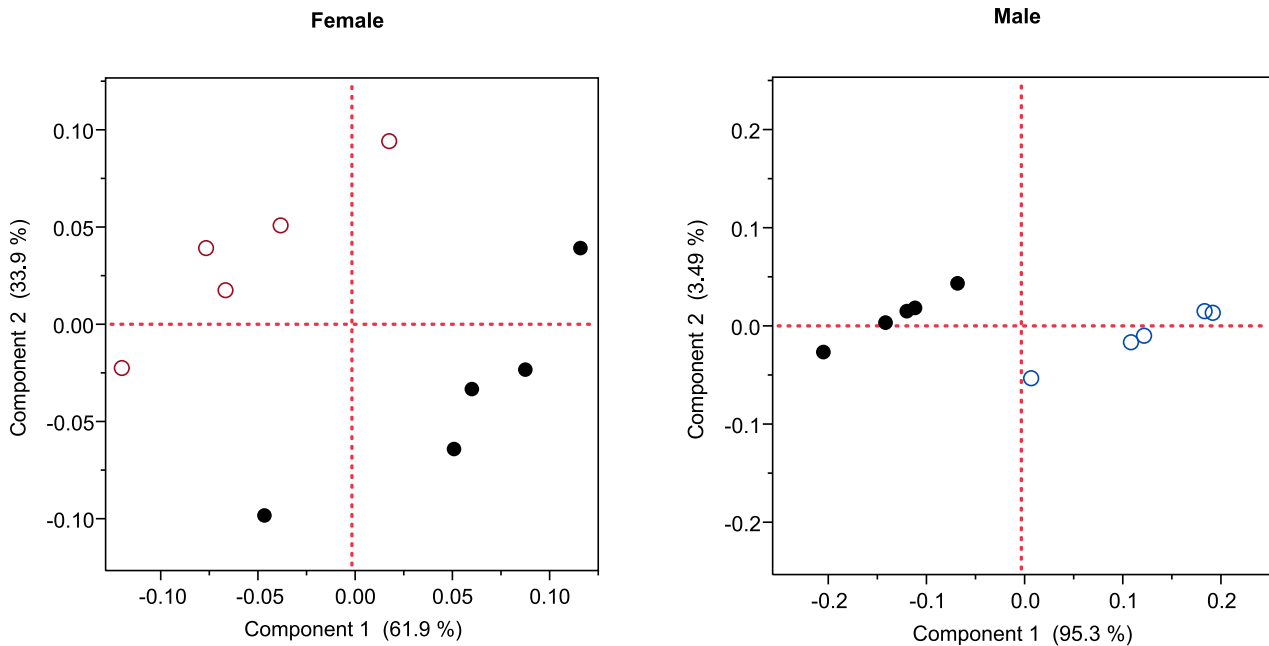

**B**

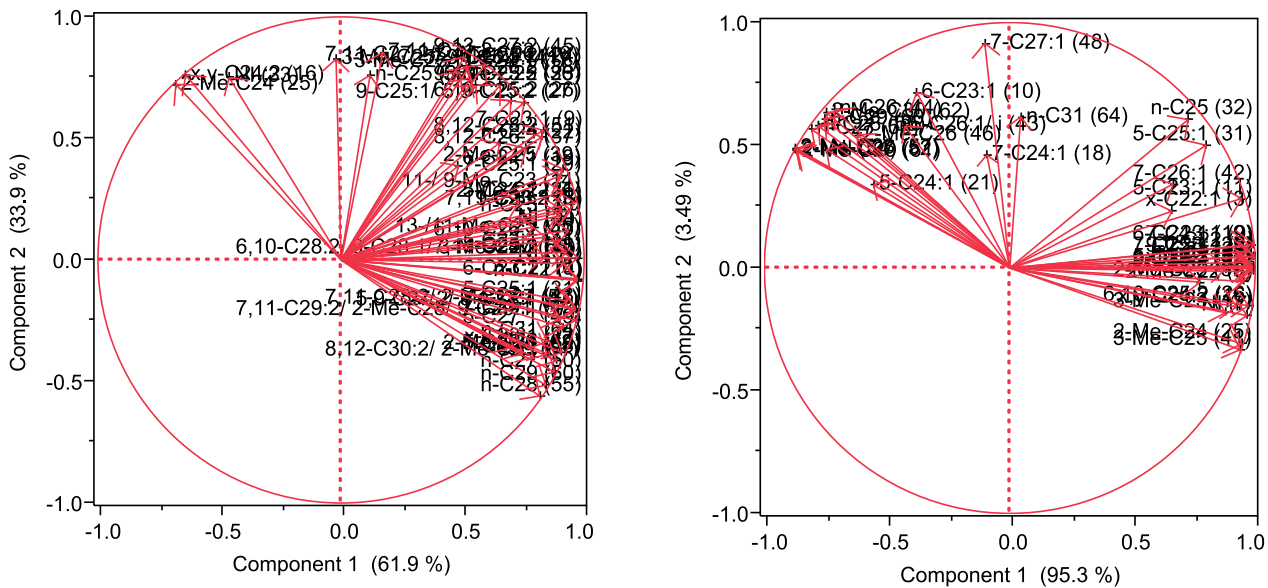

C

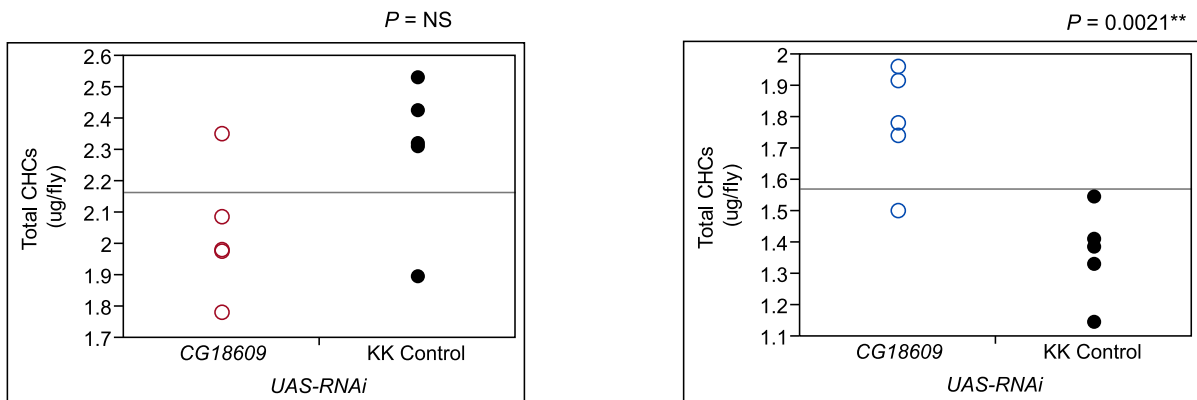

Supplement: supp [file elife-09861-supp-v2.zip]

*PromE(800)-GAL4 x UAS-Cyp4s3*

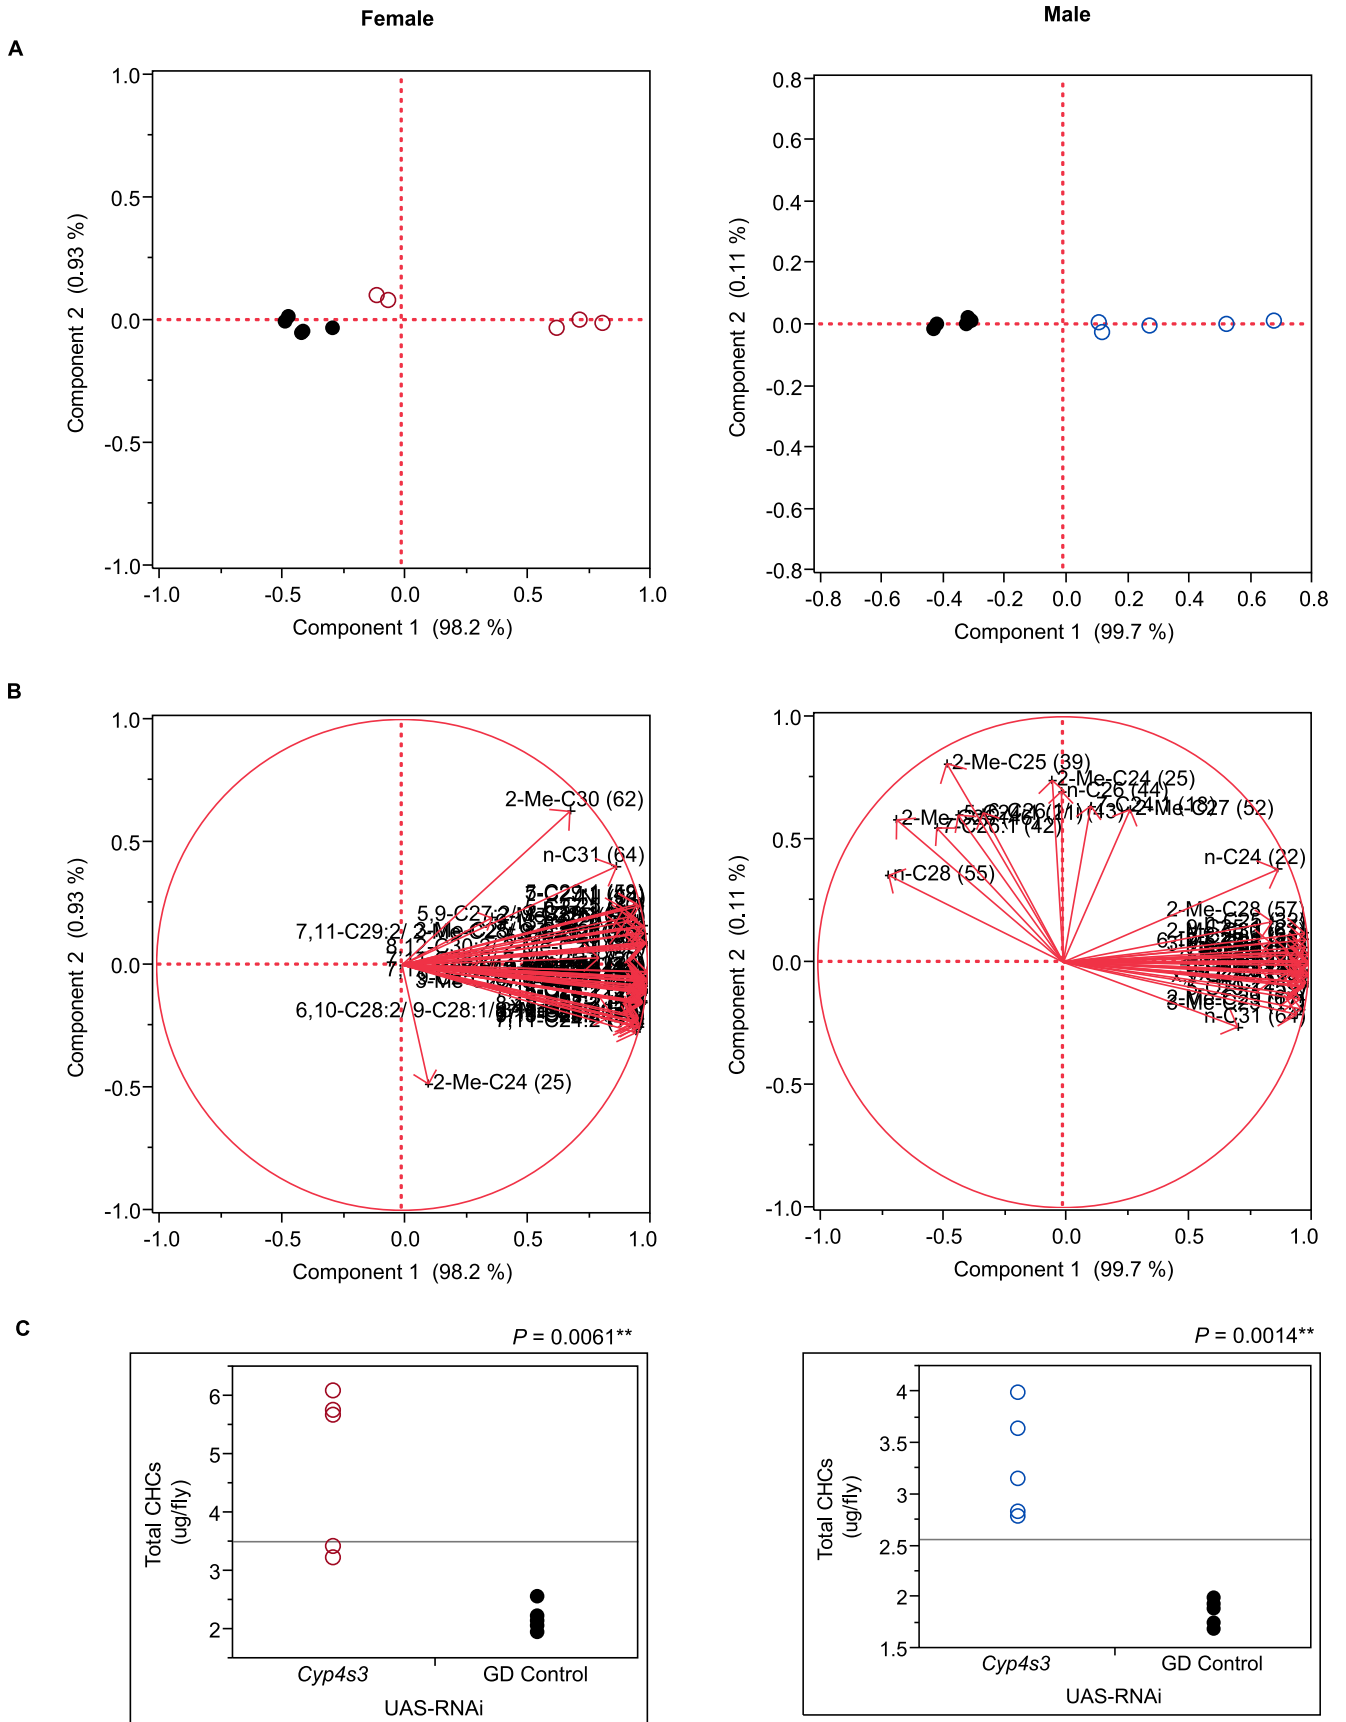

Supplement: supp [file elife-09861-supp-v2.zip]

***PromE(800)-GAL4 x UAS-Cyp9f2***

**A**

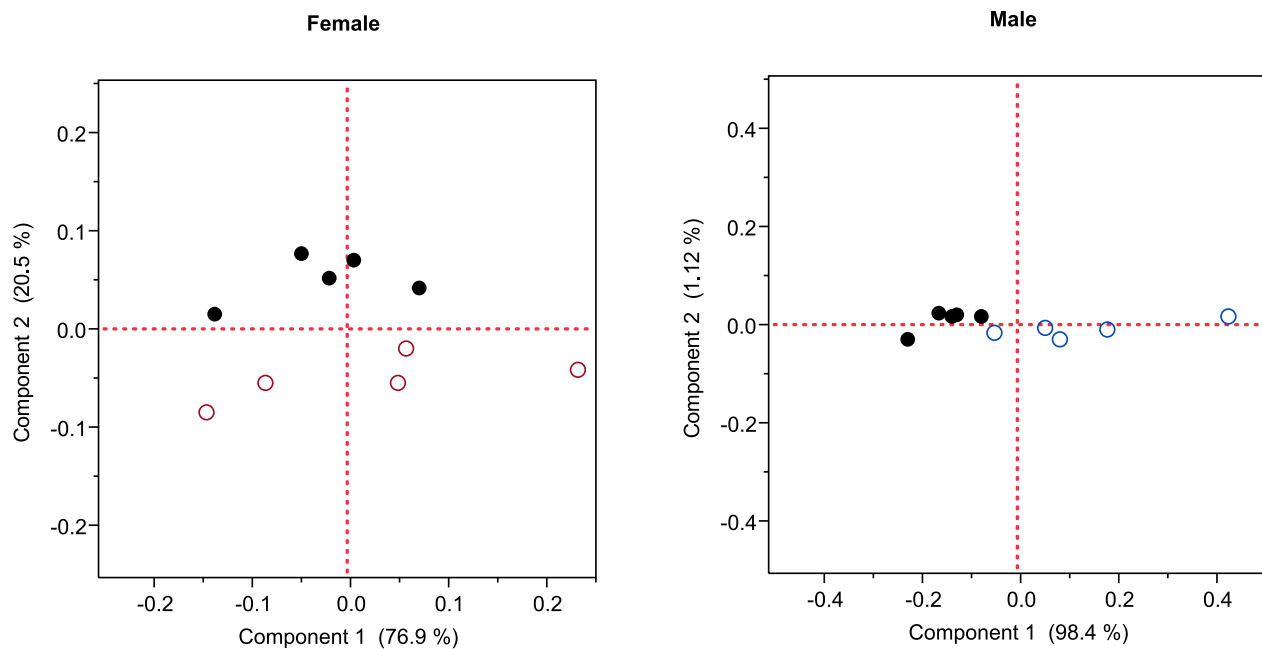

**B**

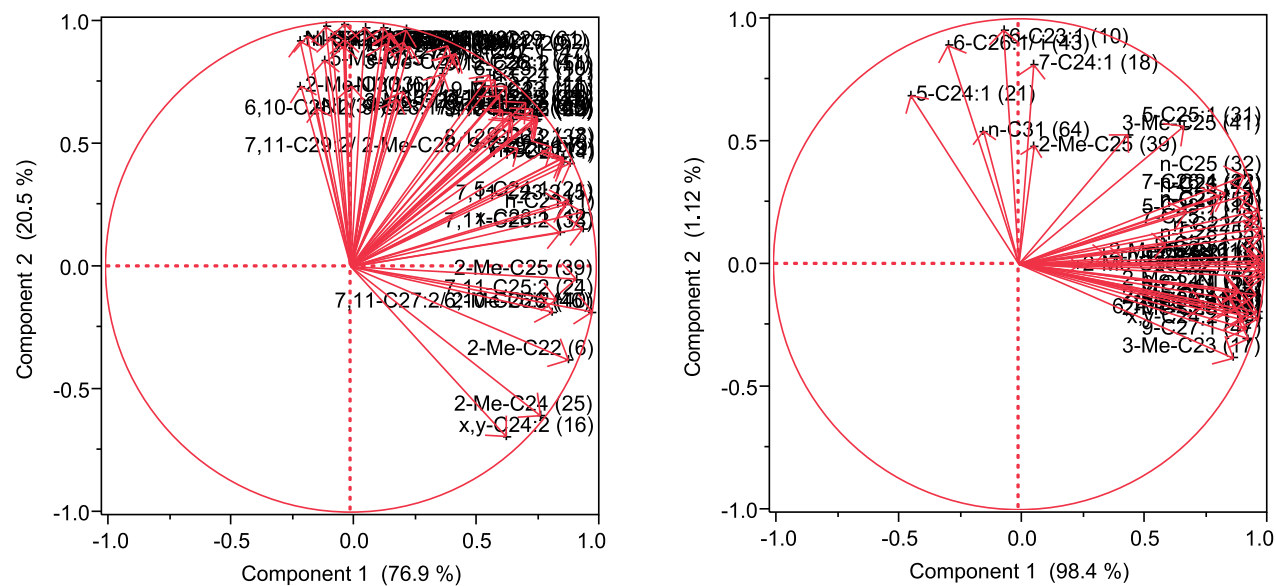

**C**

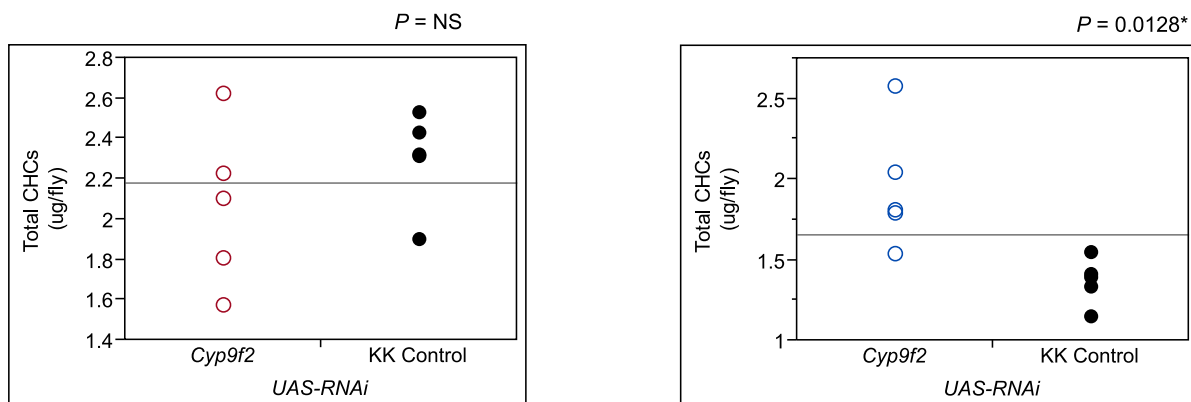

Supplement: supp [file elife-09861-supp-v2.zip]

*PromE(800)-GAL4 x UAS-Prx6005*

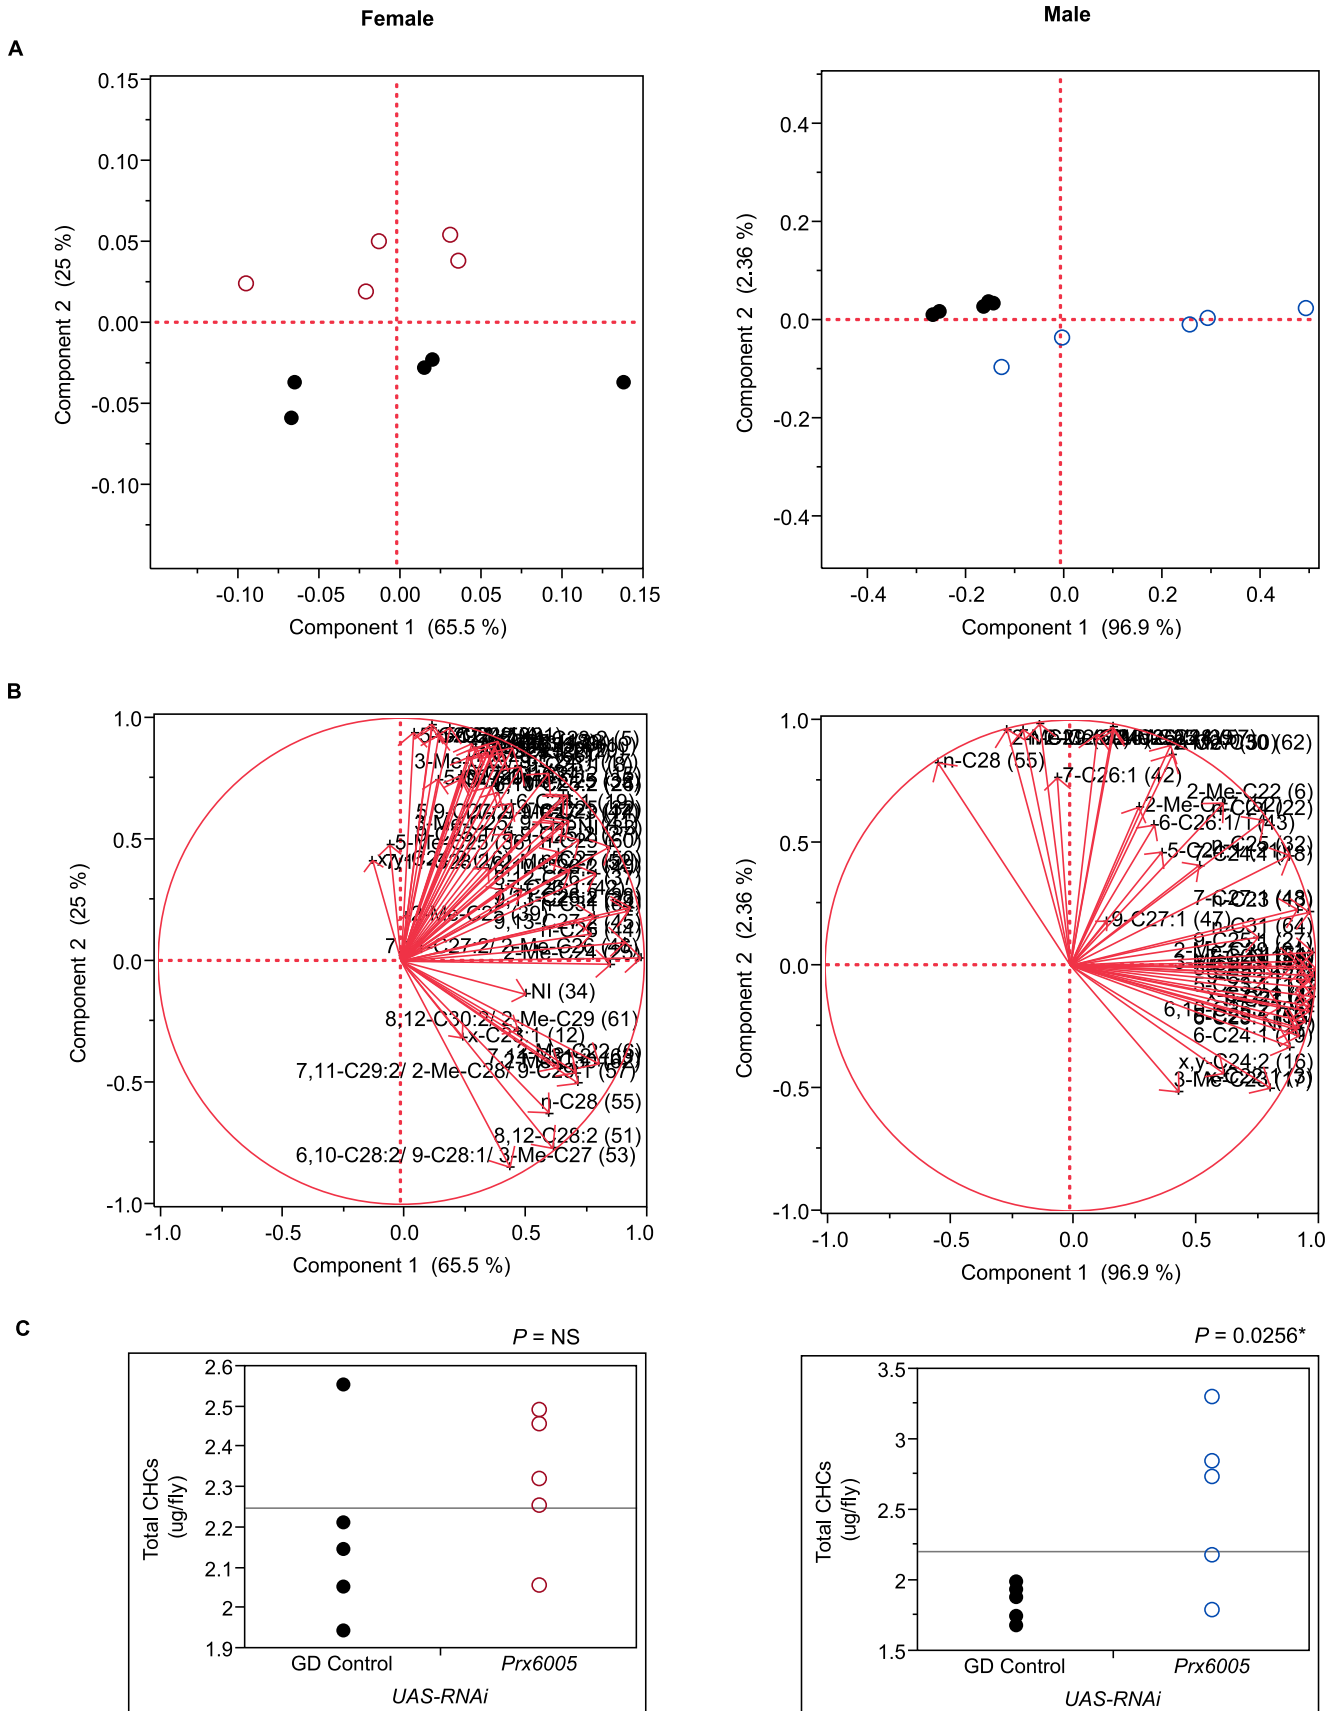

Supplement: supp [file elife-09861-supp-v2.zip]

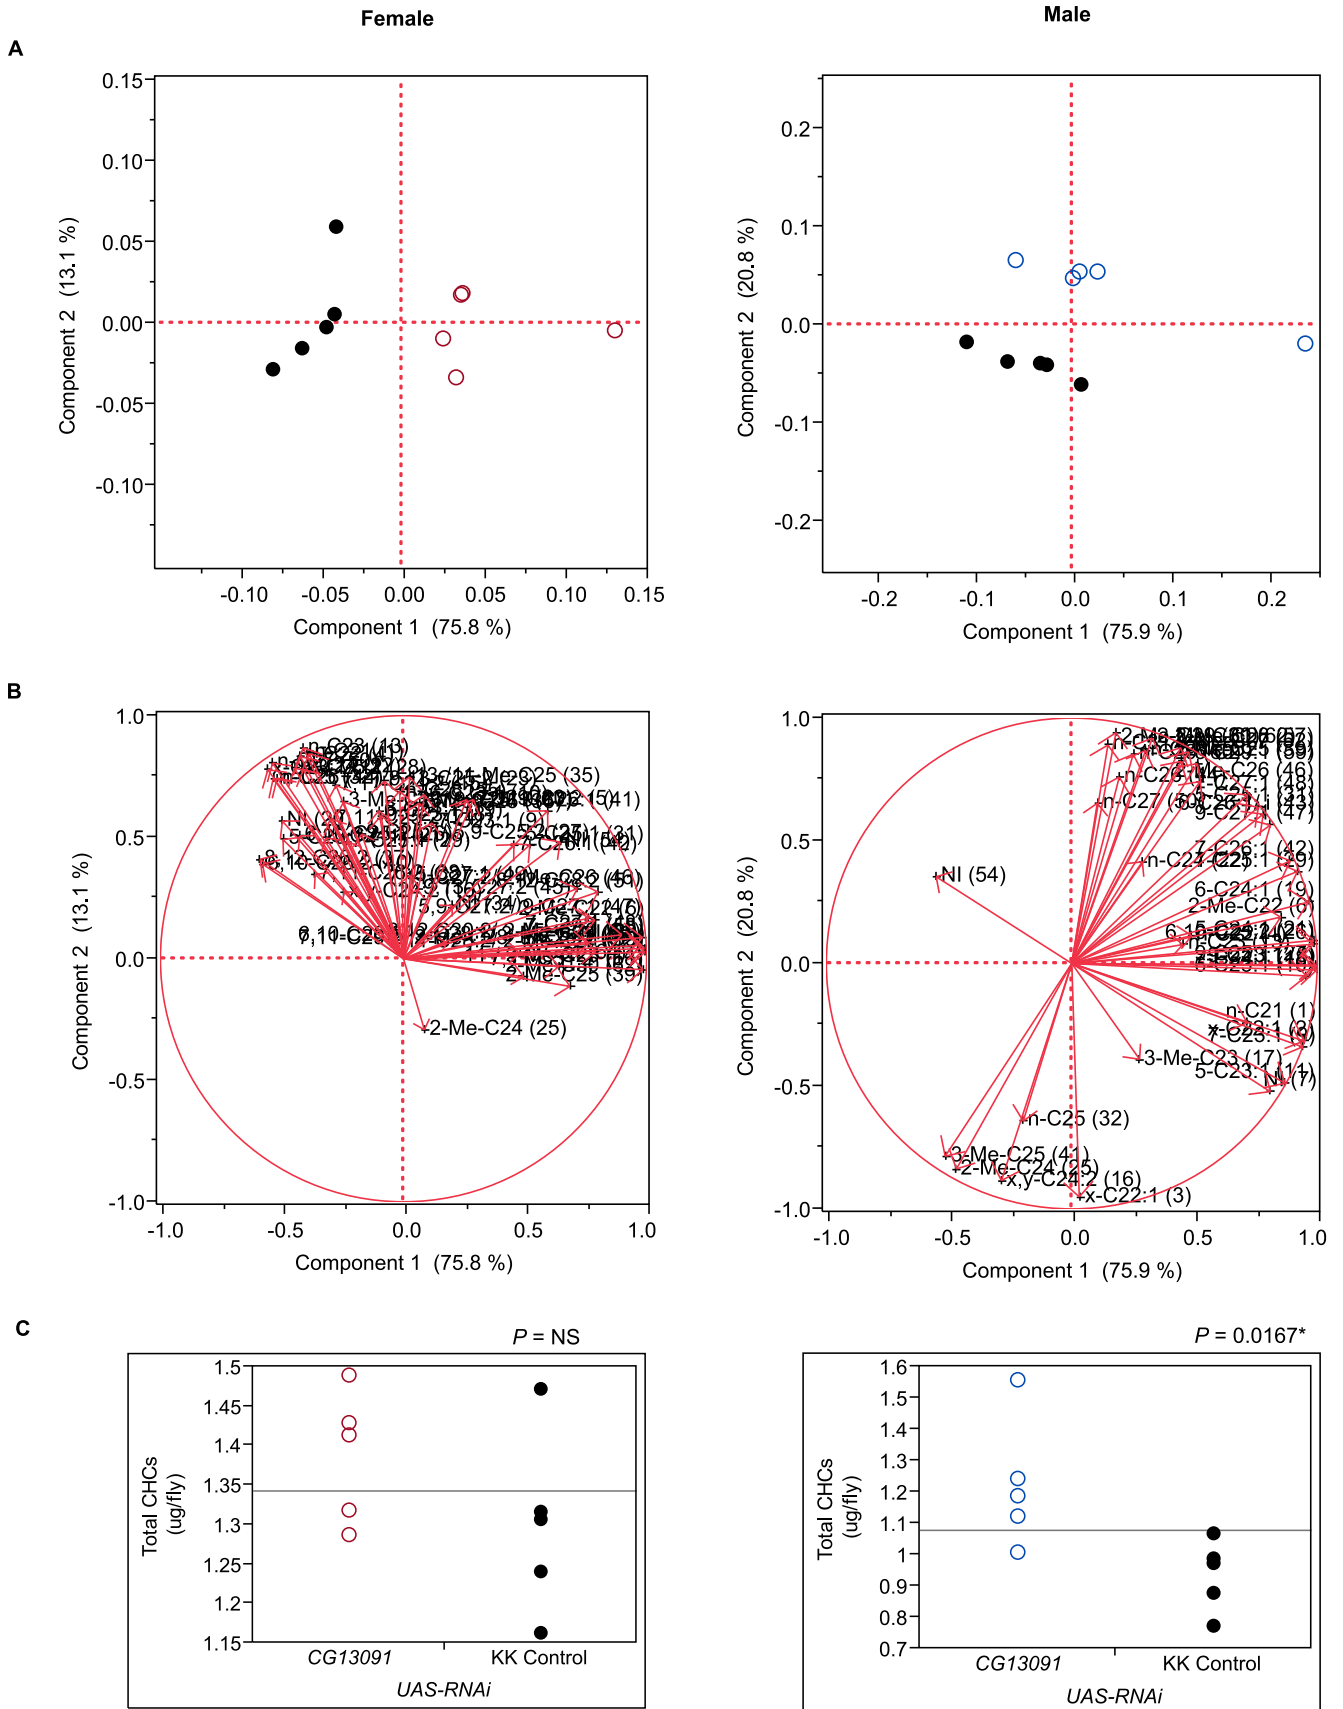

Supplement: supp [file elife-09861-supp-v2.zip]

PromE(800)-GAL4 x UAS-Nrt

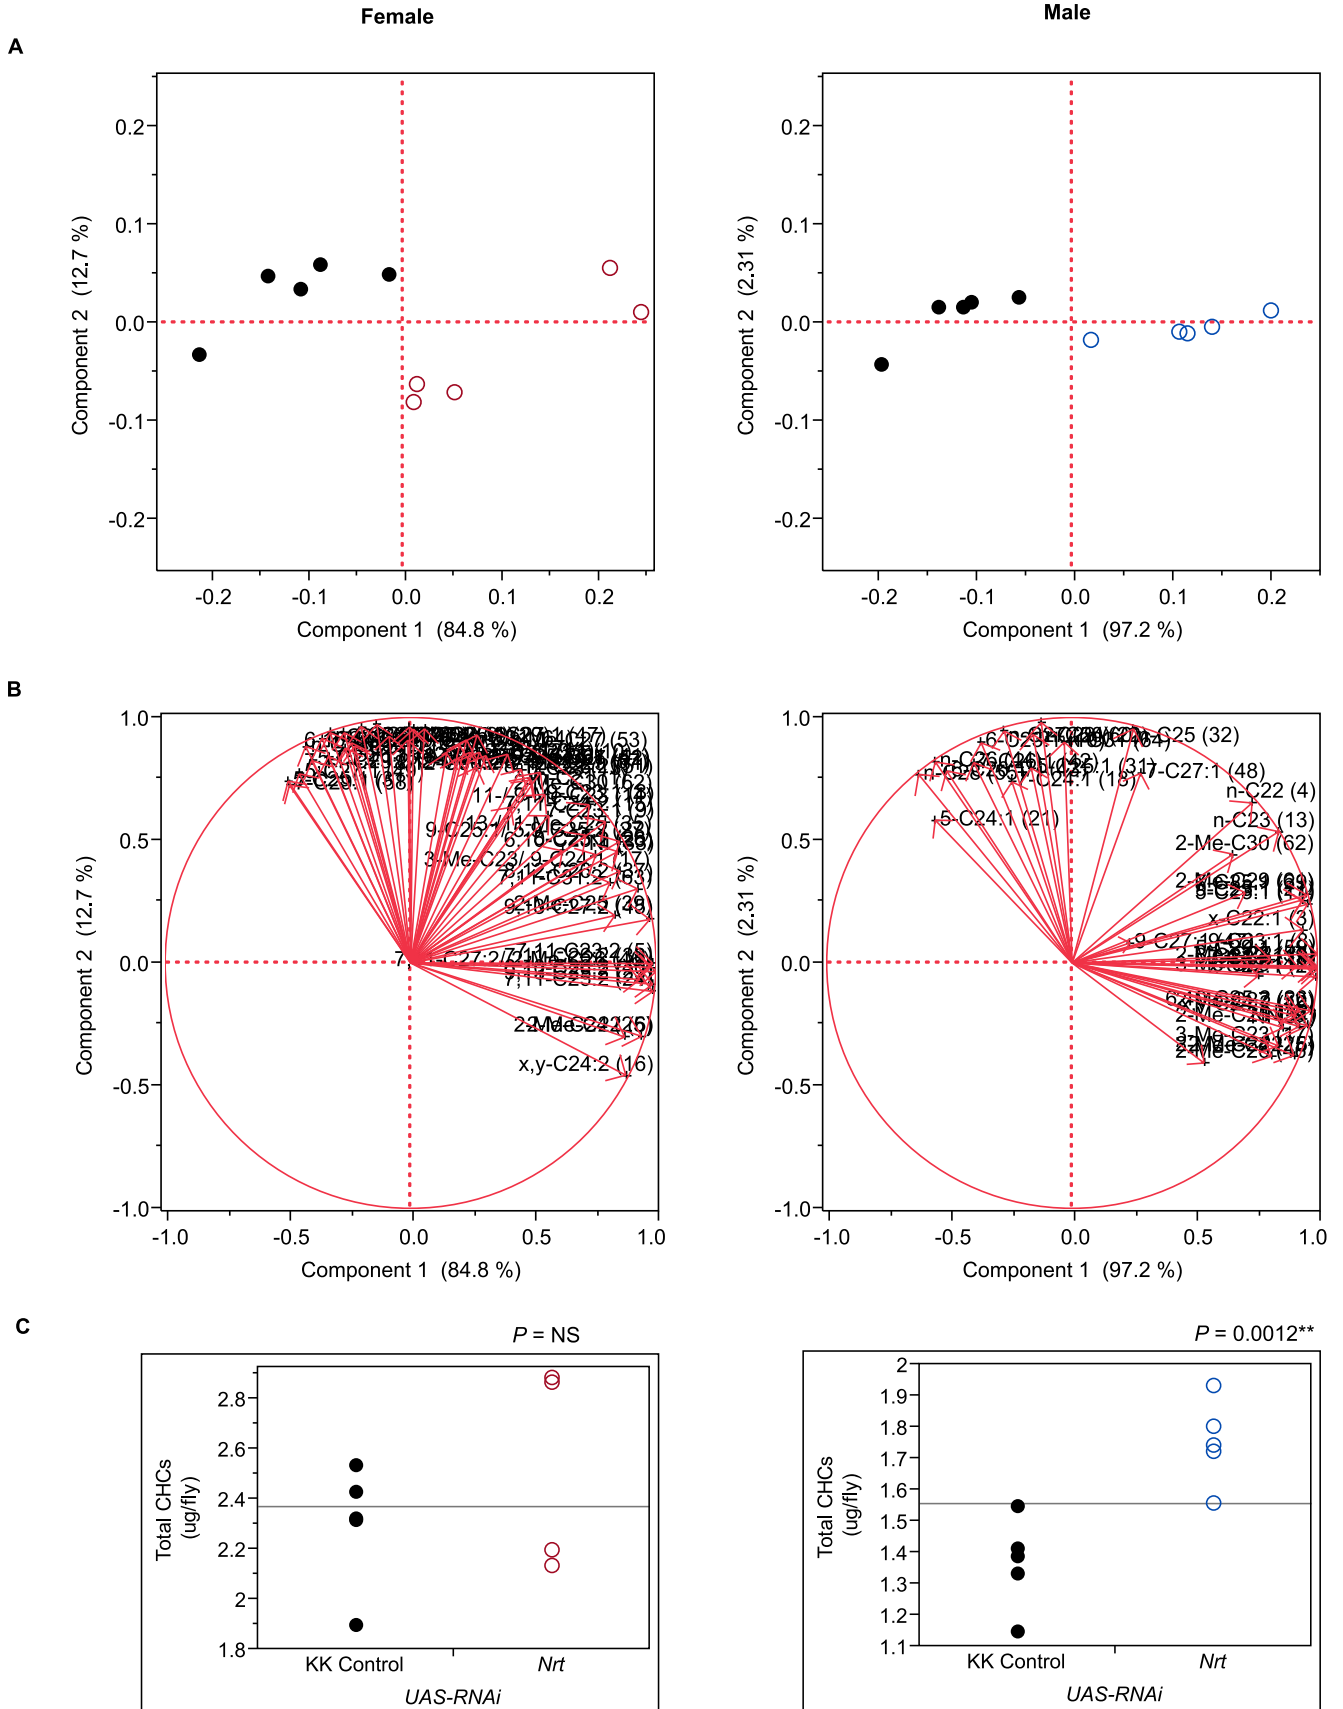

Supplement: supp [file elife-09861-supp-v2.zip]

*PromE(800)-GAL4 x UAS-app*

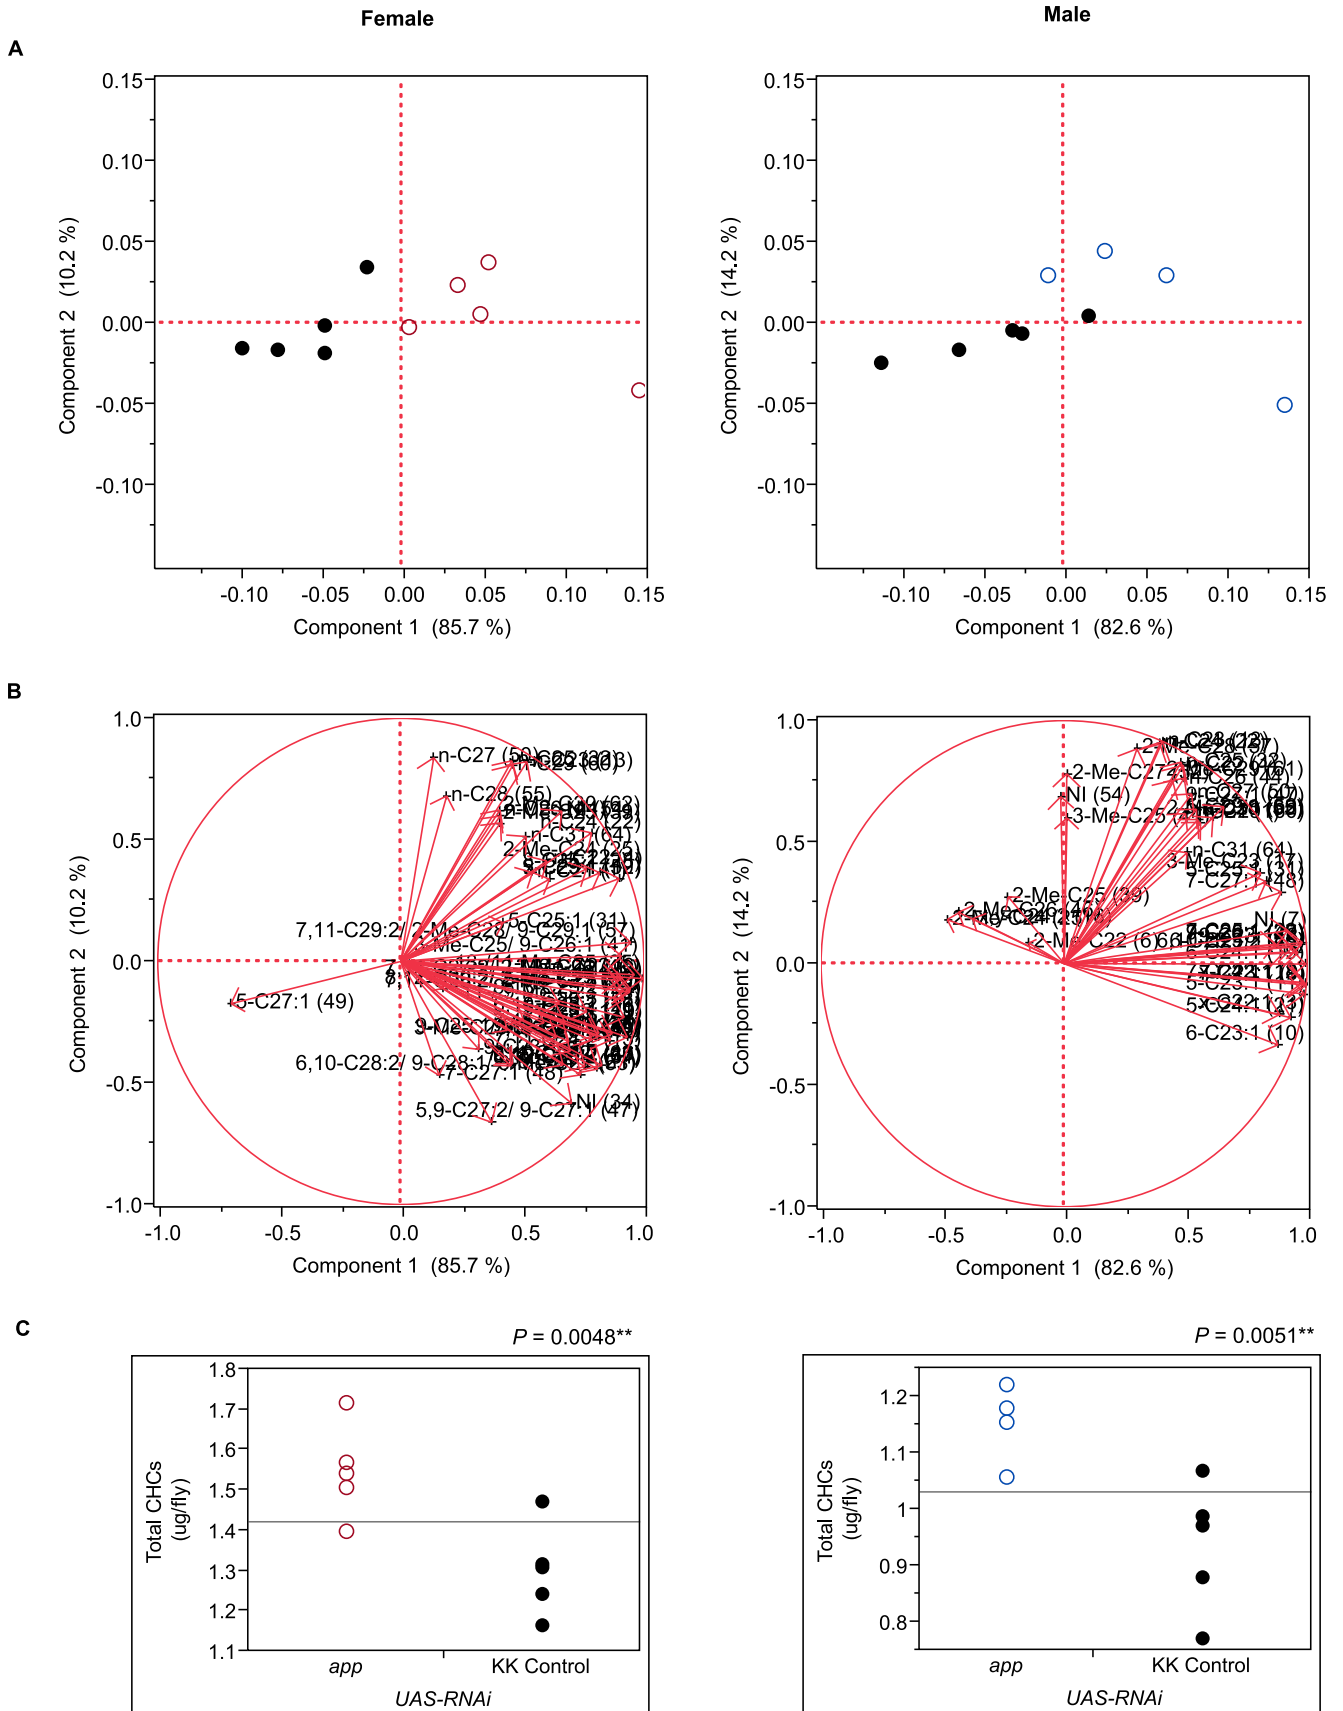

Supplement: supp [file elife-09861-supp-v2.zip]

*PromE(800)-GAL4 x UAS-CG8814*

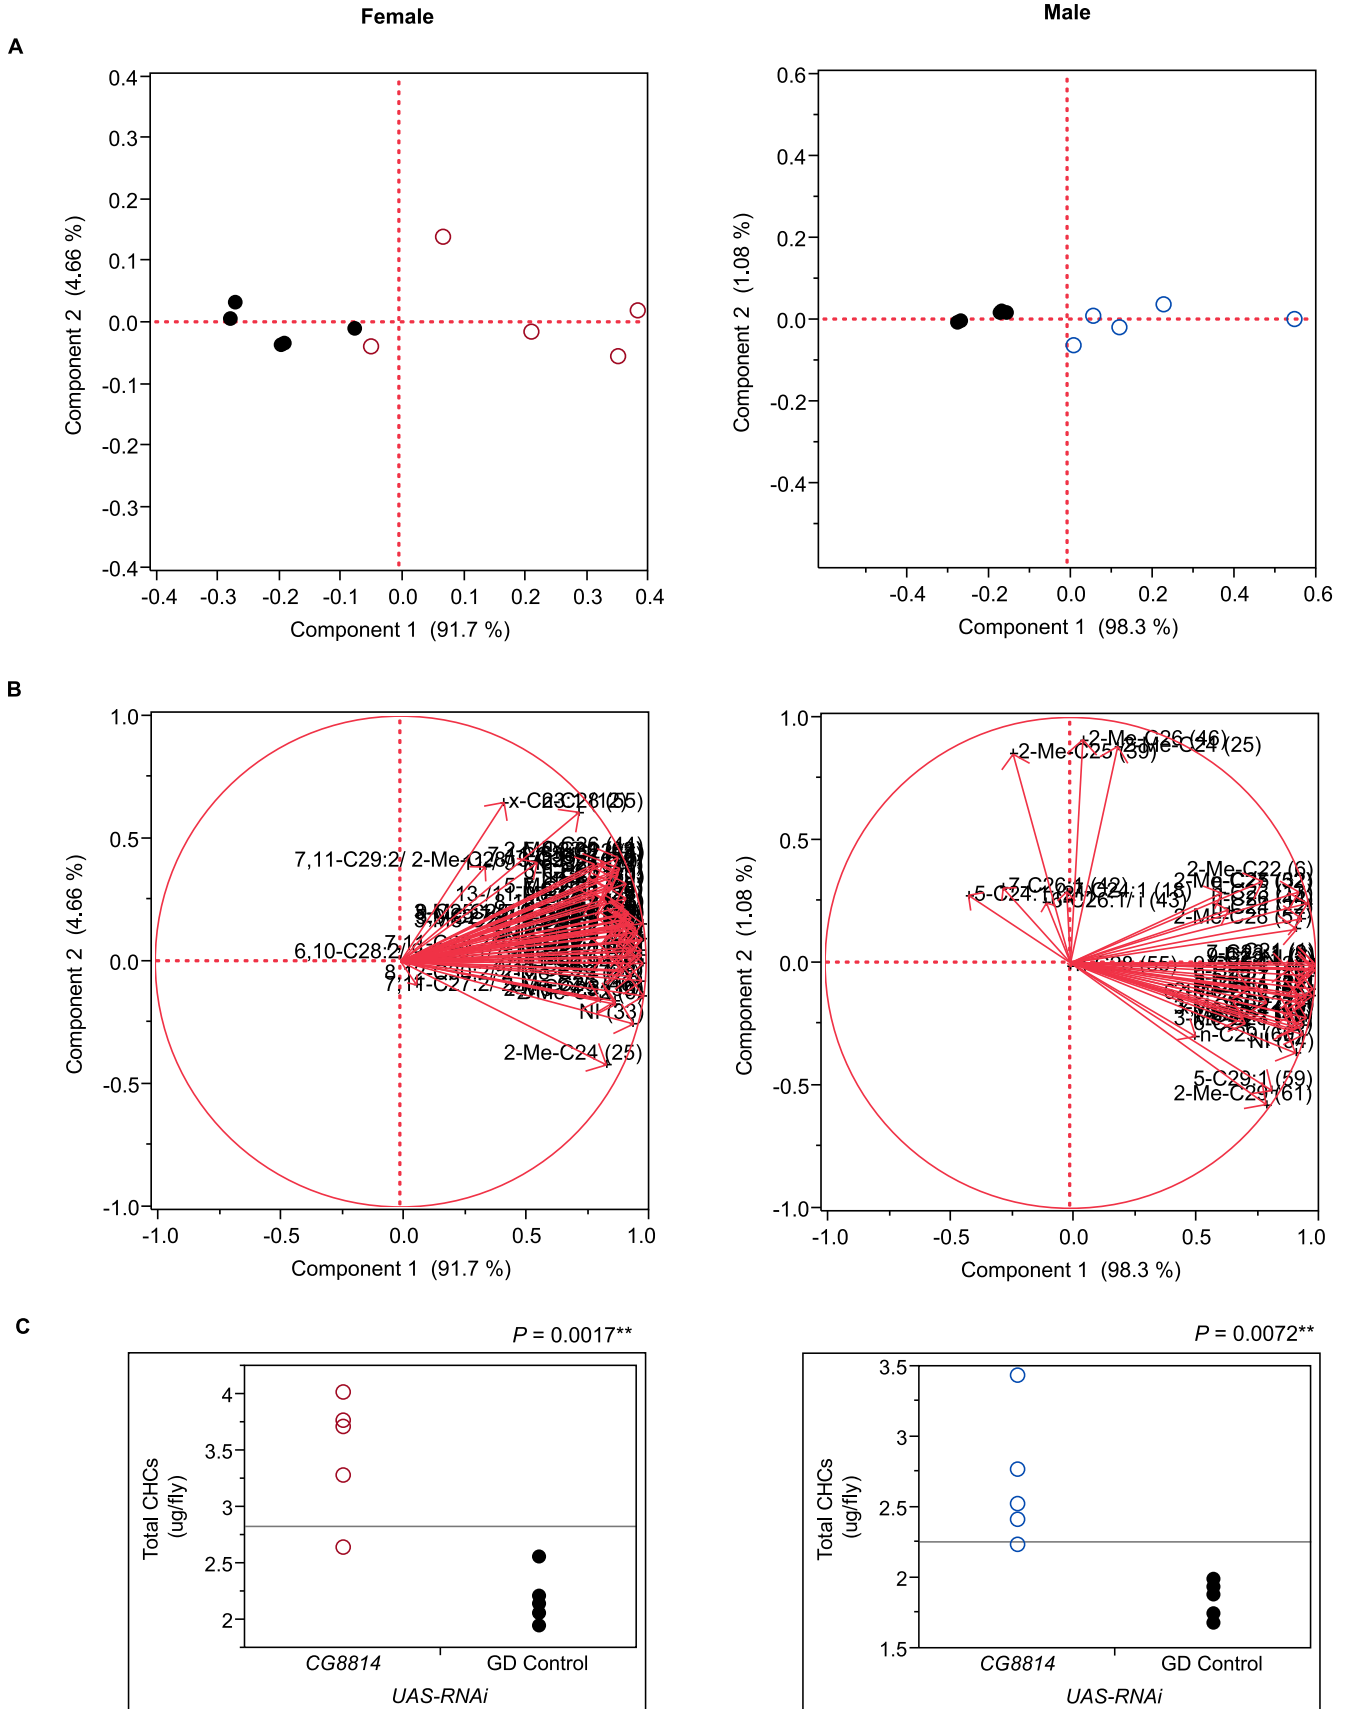

Supplement: supp [file elife-09861-supp-v2.zip]

PromE(800)-GAL4 x UAS-pxn

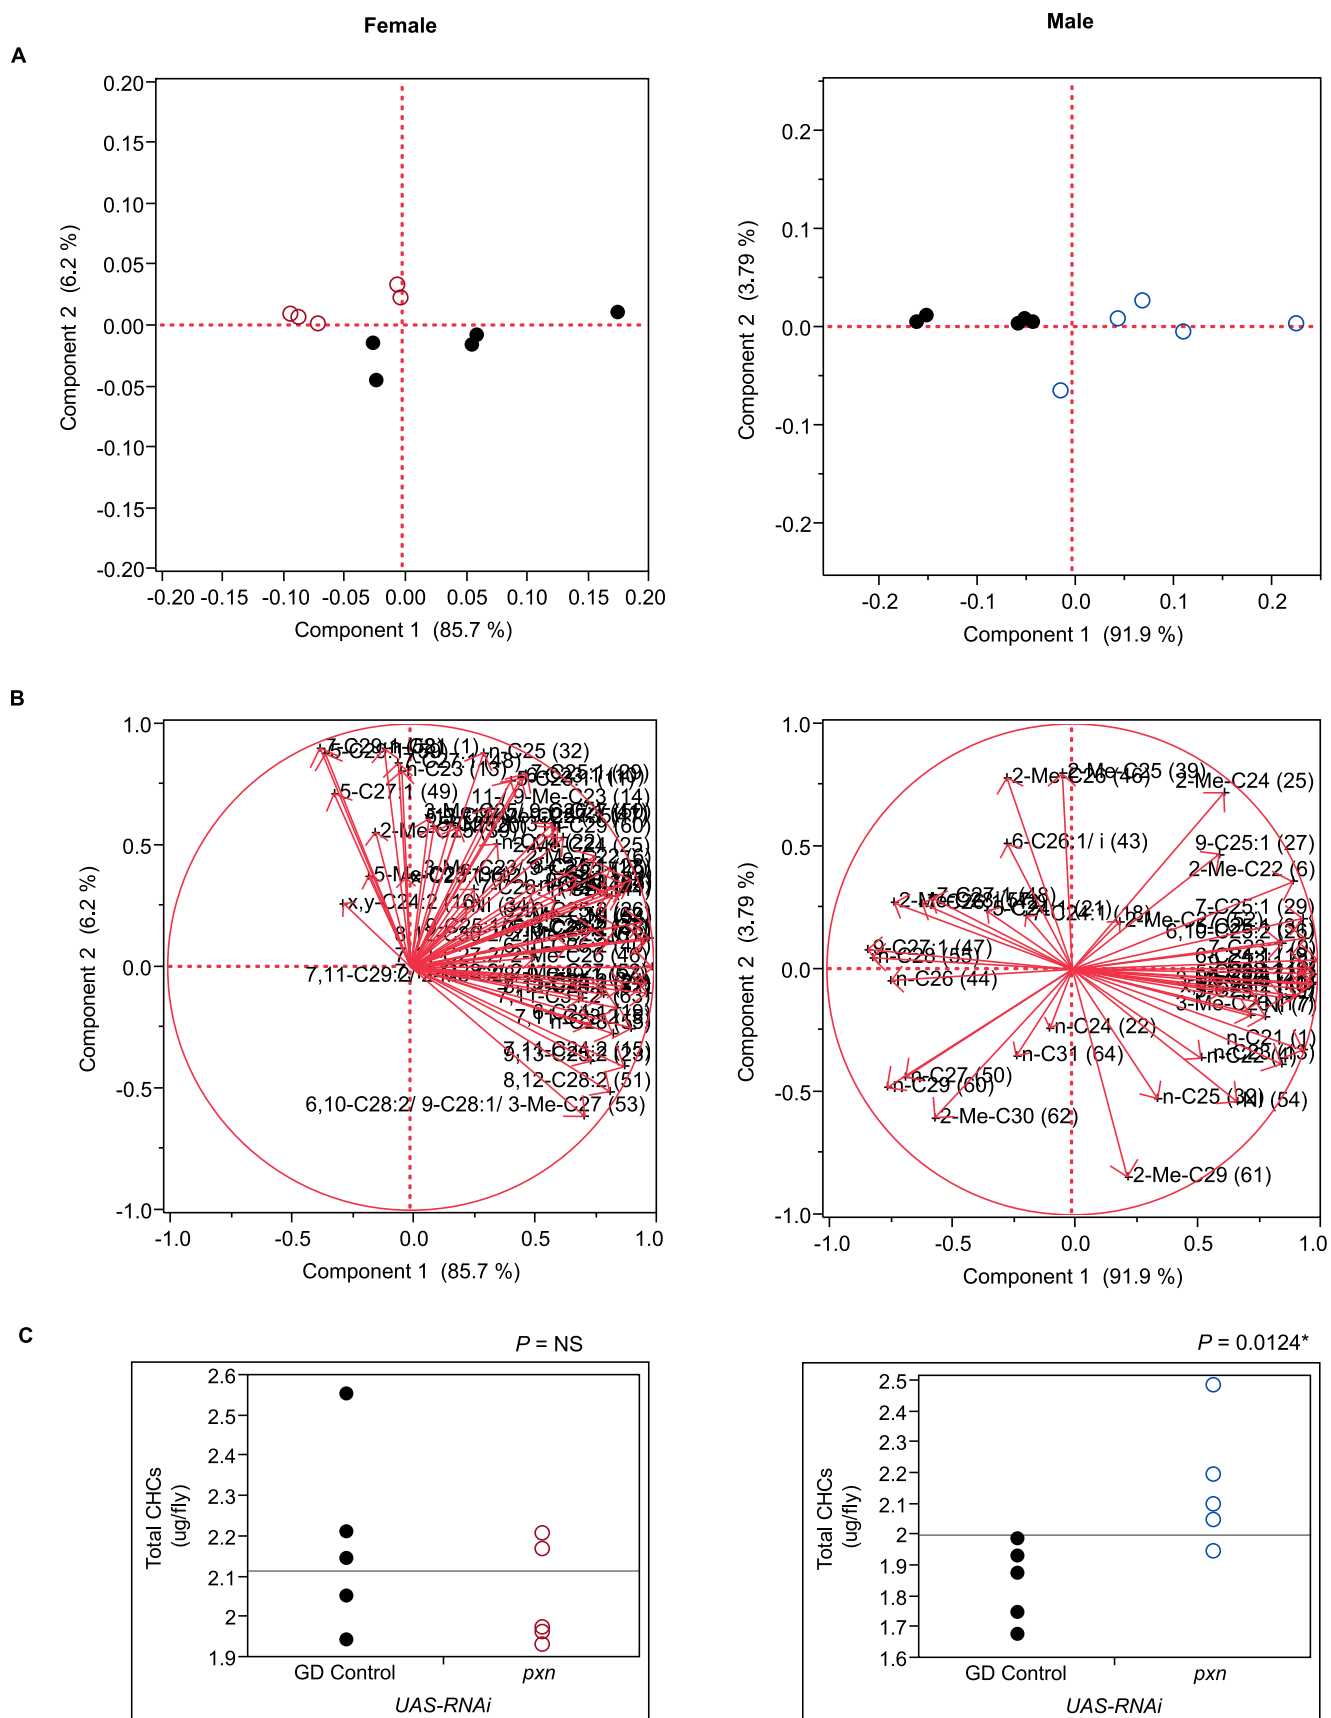

Supplement: supp [file elife-09861-supp-v2.zip]

**PromE(800)-GAL4 x UAS-Lip2**

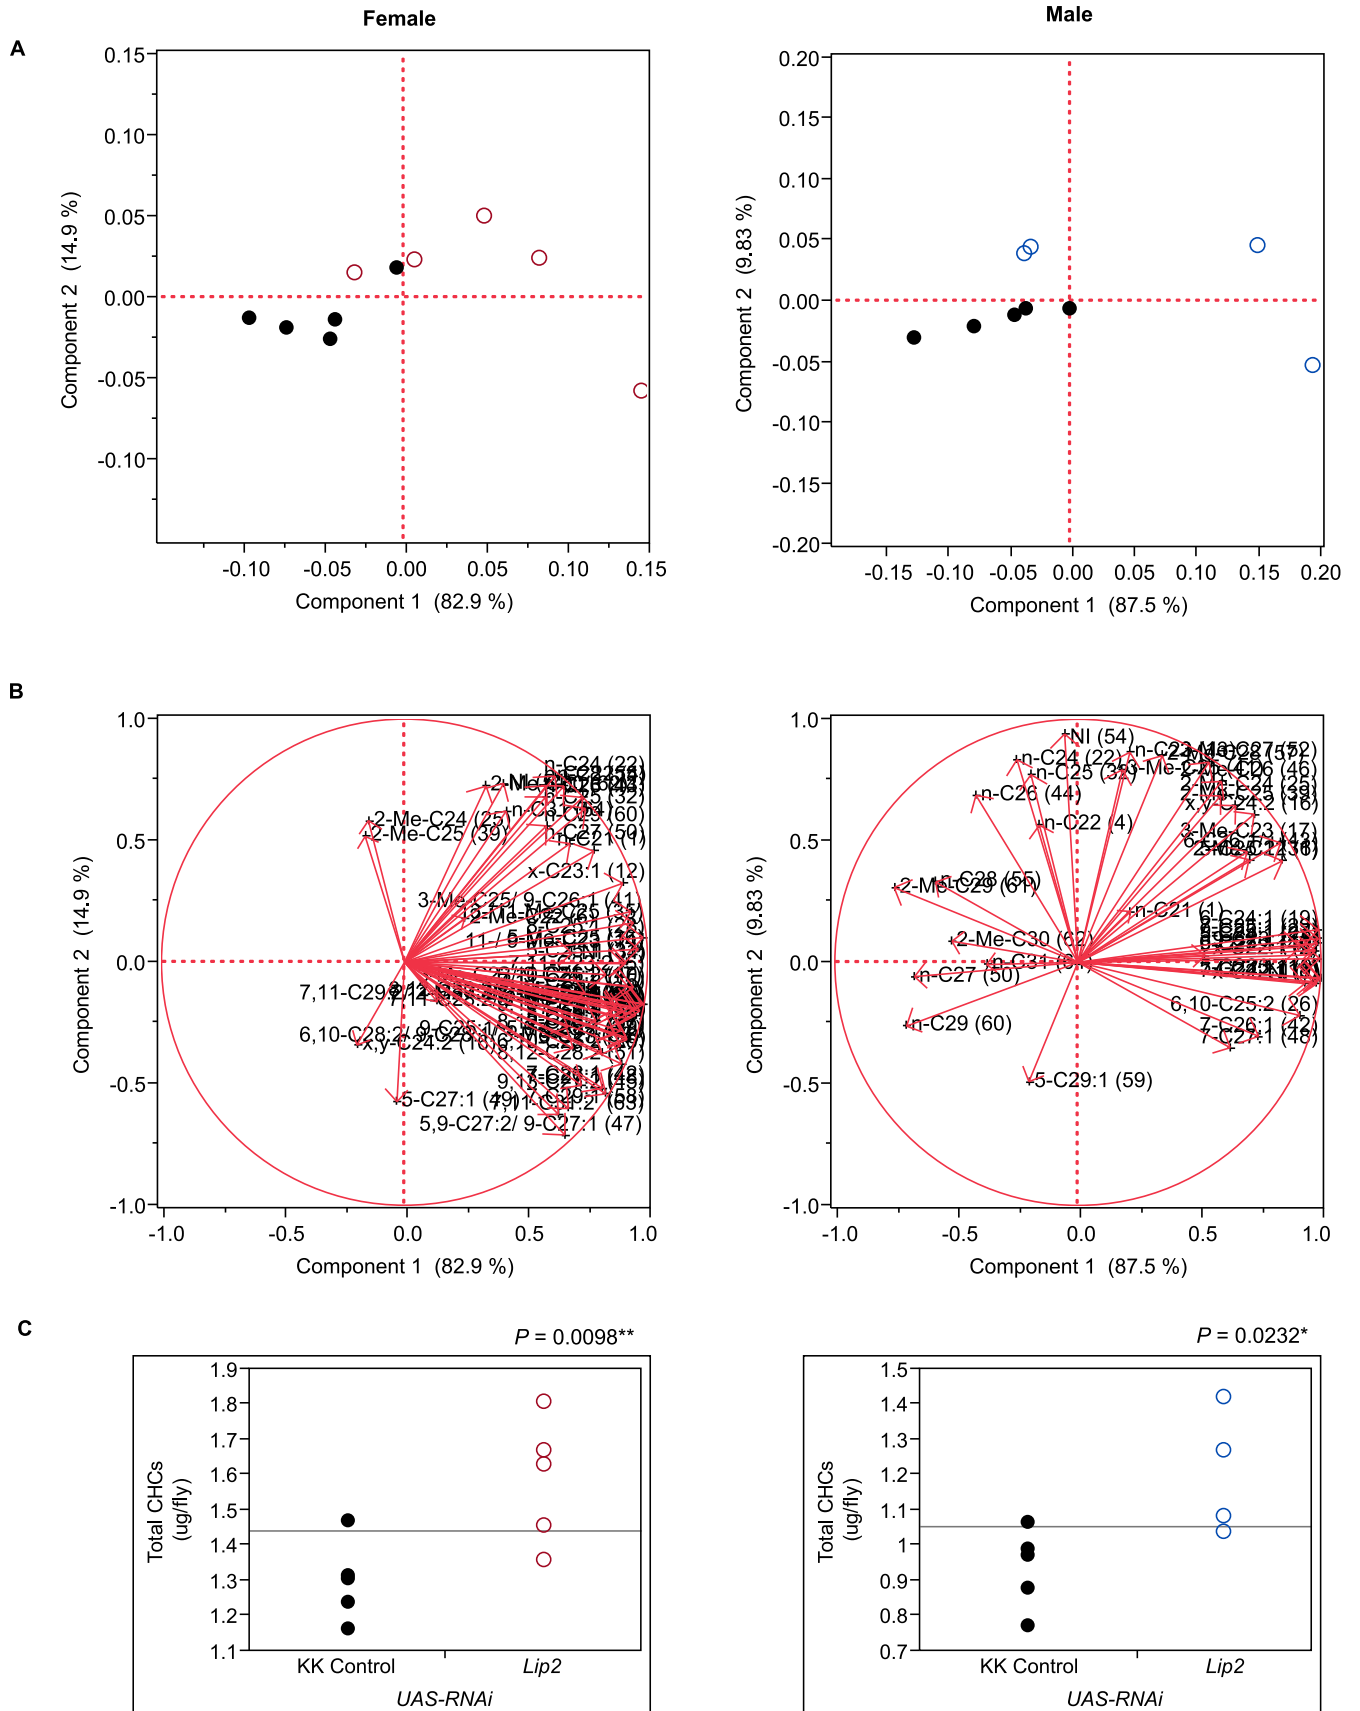

Supplement: supp [file elife-09861-supp-v2.zip]

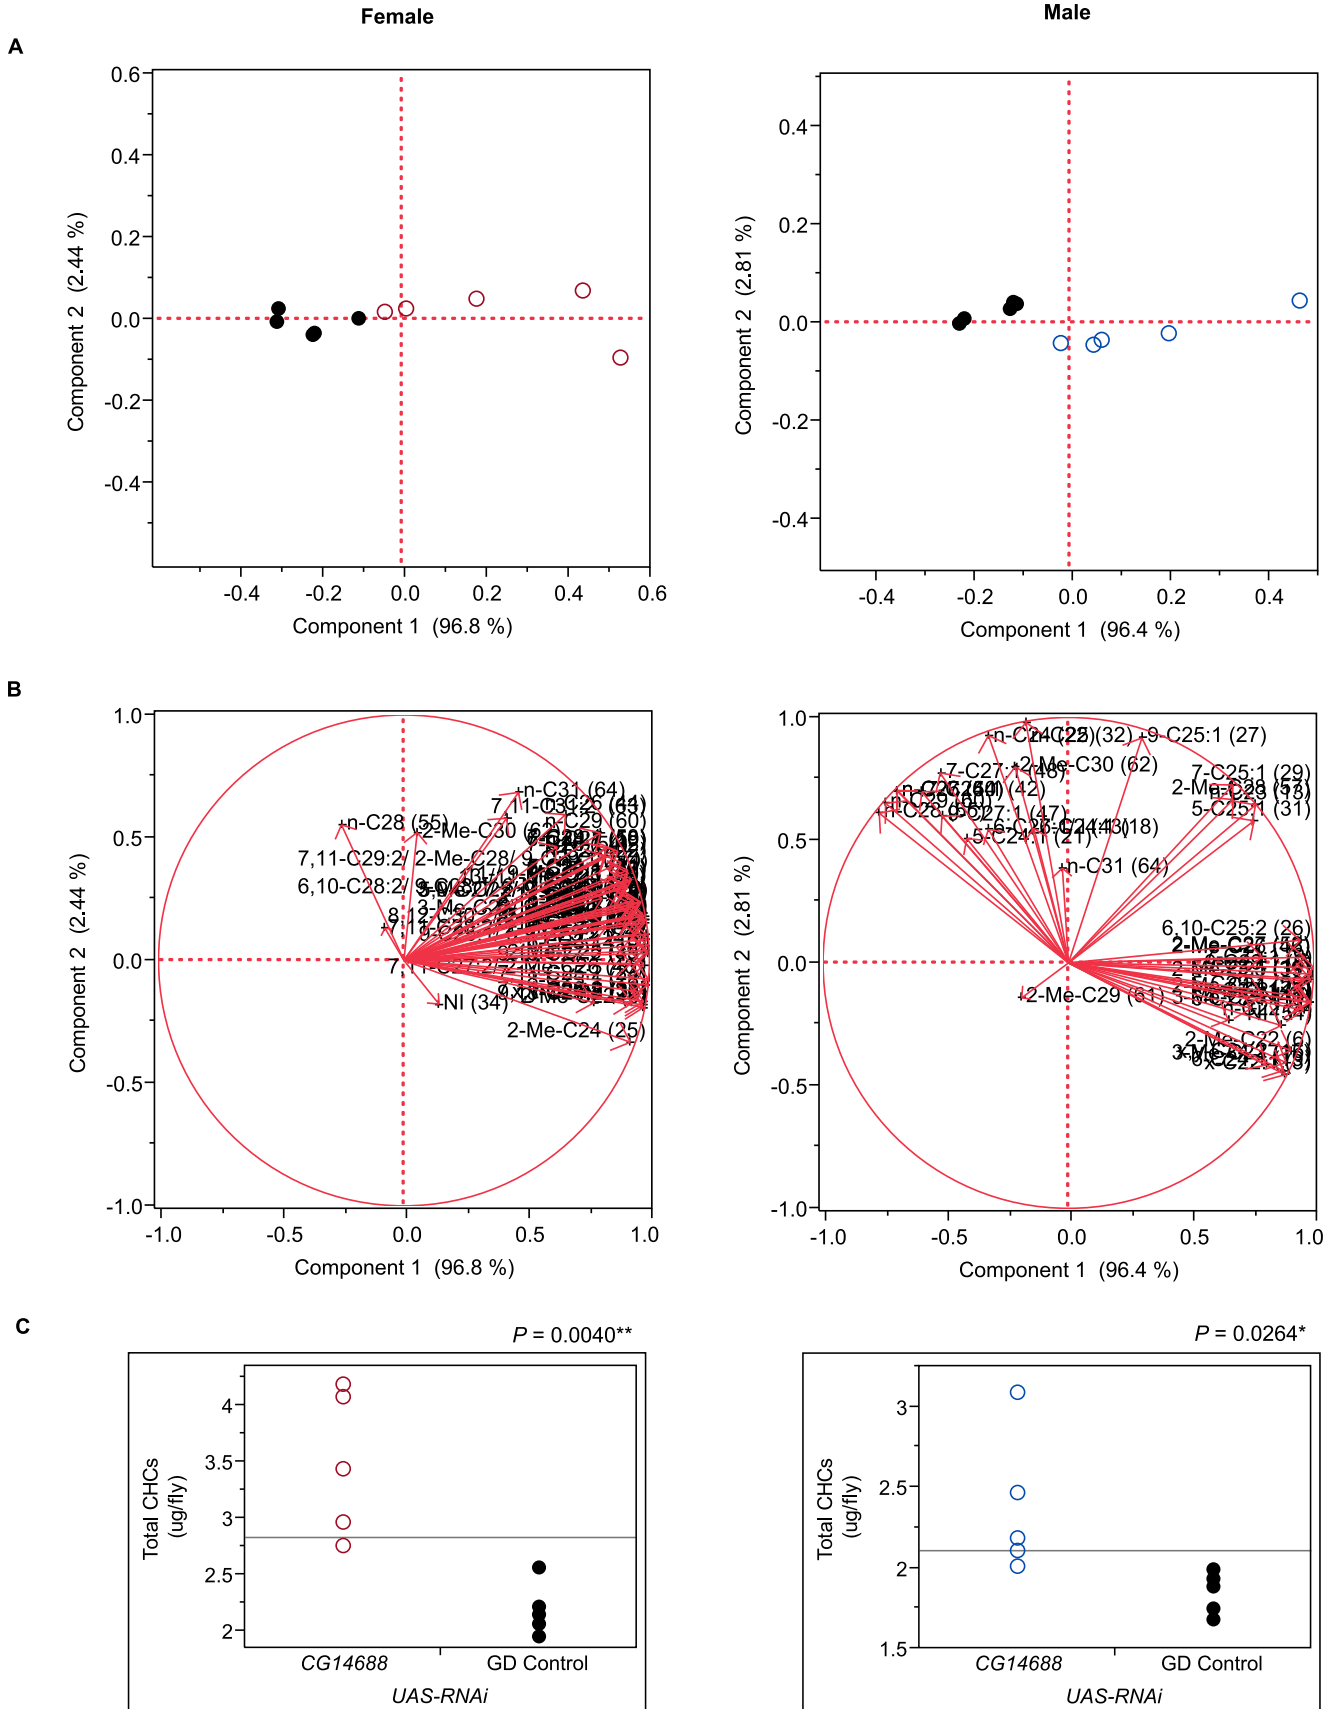

Supplement: supp [file elife-09861-supp-v2.zip]

*PromE(800)-GAL4 x UAS-Pxd*

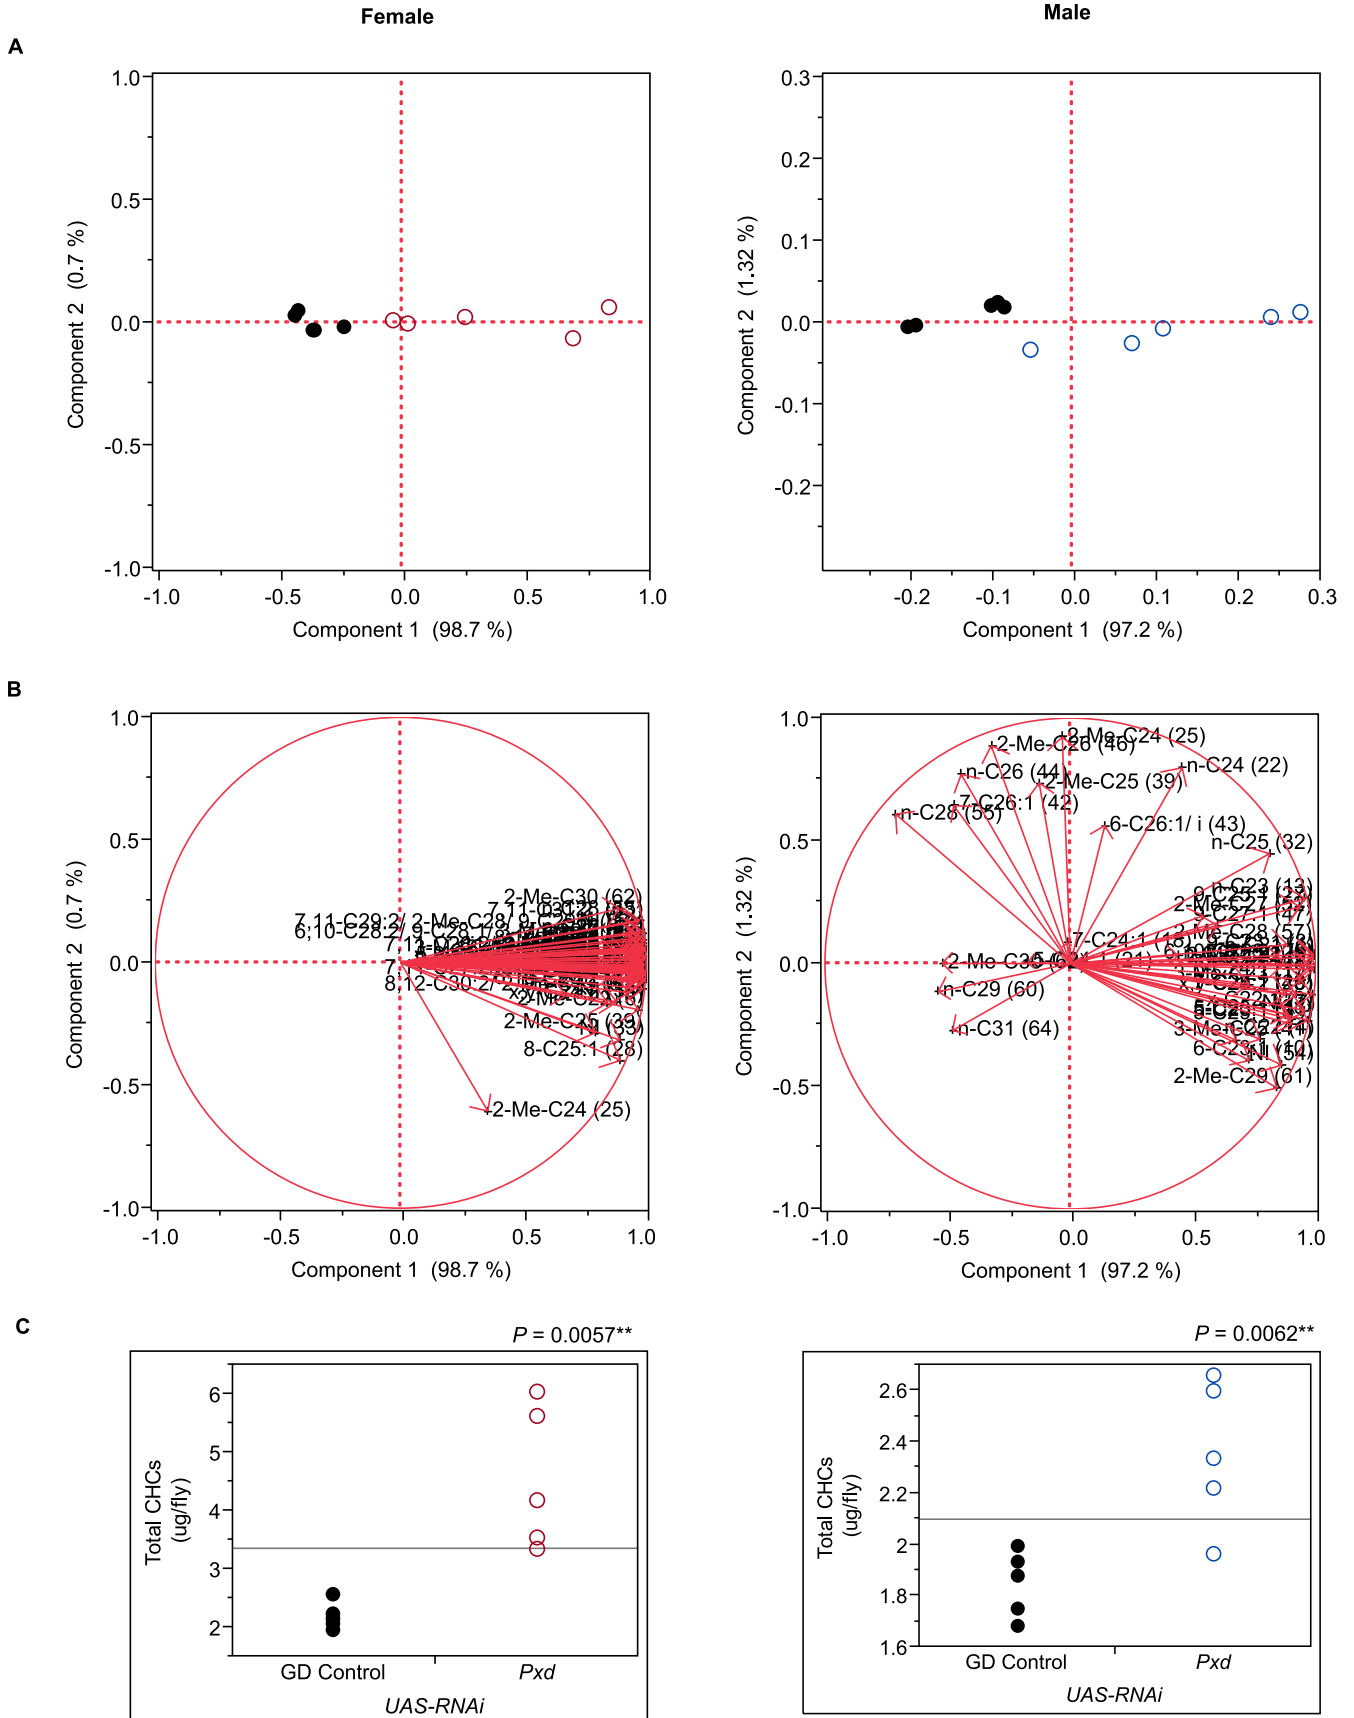

Supplement: supp [file elife-09861-supp-v2.zip]

*PromE(800)-GAL4 x UAS-Desi*

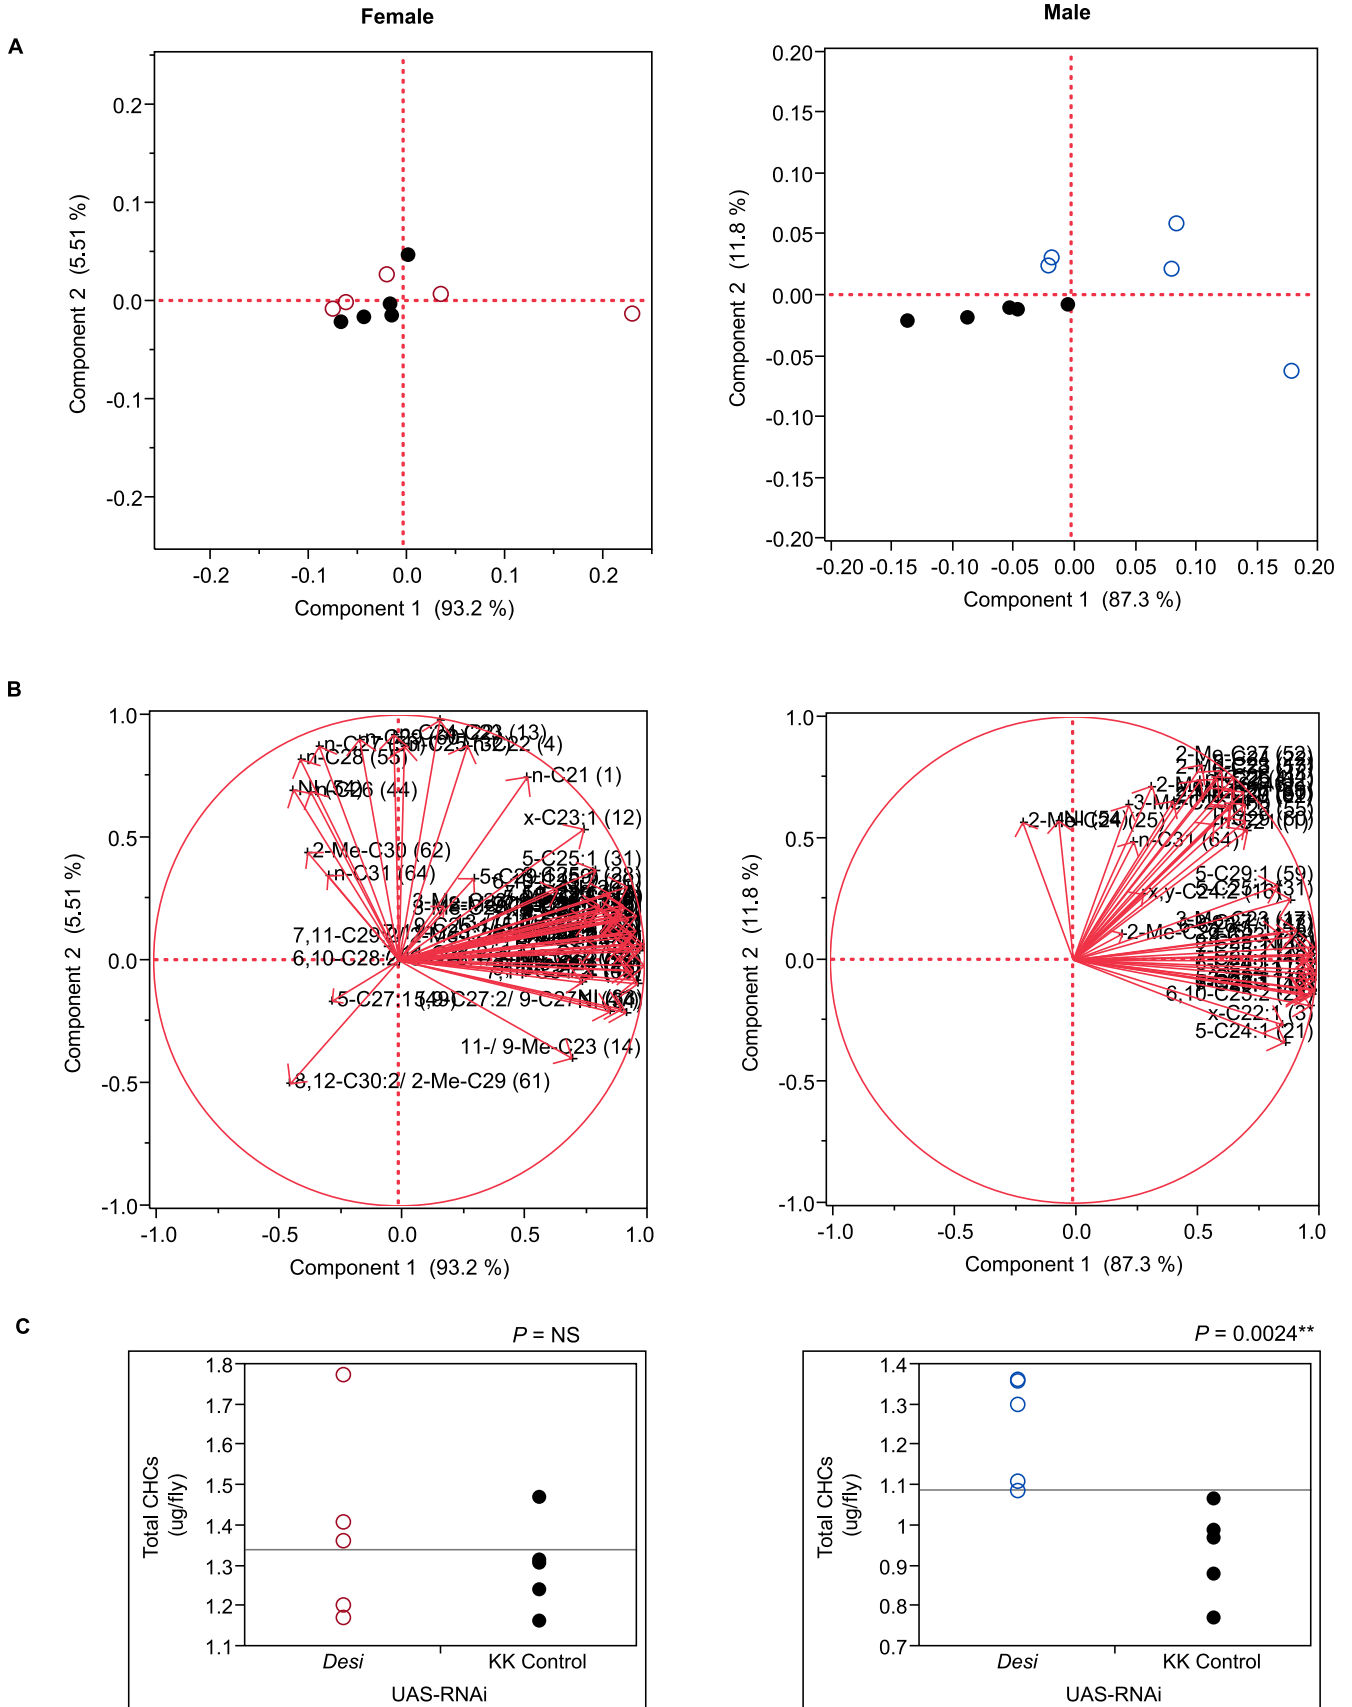

Supplement: supp [file elife-09861-supp-v2.zip]
